# Supplementary material
Source: publisher figshare collection journal article supplement (https://gsajournals.figshare.com/ndownloader/files/18900929)
Supplement: Supplementary file 1 [file 18900929]

## Sheet: Replicates1-3
Table S10. Raw data from ddPCR of yeast
Replicate 1
BY4741_TechRep_1			BY4741_TechRep_2			BY4741_TechRep_3			NegativeControl_TechRep1			B30_TechRep_1			B30_TechRep_2			B30_TechRep_3			NegativeControl_TechRep_2			AFG_TechRep_1			AFG_TechRep_2			AFG_TechRep_3			NegativeControl_TechRep_3			AHG_TechRep_1			AHG_TechRep_2			AHG_TechRep_3			AHQ_TechRep_1			AHQ_TechRep_2
Ch1 Amplitude	Ch2 Amplitude	Cluster	Ch1 Amplitude	Ch2 Amplitude	Cluster	Ch1 Amplitude	Ch2 Amplitude	Cluster	Ch1 Amplitude	Ch2 Amplitude	Cluster	Ch1 Amplitude	Ch2 Amplitude	Cluster	Ch1 Amplitude	Ch2 Amplitude	Cluster	Ch1 Amplitude	Ch2 Amplitude	Cluster	Ch1 Amplitude	Ch2 Amplitude	Cluster	Ch1 Amplitude	Ch2 Amplitude	Cluster	Ch1 Amplitude	Ch2 Amplitude	Cluster	Ch1 Amplitude	Ch2 Amplitude	Cluster	Ch1 Amplitude	Ch2 Amplitude	Cluster	Ch1 Amplitude	Ch2 Amplitude	Cluster	Ch1 Amplitude	Ch2 Amplitude	Cluster	Ch1 Amplitude	Ch2 Amplitude	Cluster	Ch1 Amplitude	Ch2 Amplitude	Cluster	Ch1 Amplitude	Ch2 Amplitude
262.514	6076.7	4	285.778	6528.96	4	300.203	5896.35	4	449.16	1630.56	1	273.514	5618.45	4	303.345	5961.64	4	296.208	6020.9	4	432.103	1632.31	1	245.193	6173.86	4	289.374	6180.84	4	317.073	5586.83	4	439.764	1776.5	1	256.896	5854.05	4	274.122	5762.36	4	296.829	6044.61	4	275.386	5666.46	4	296.851	5514.92
276.031	6244.35	4	287.056	5720.08	4	311.316	6181.12	4	462.082	1757.3	1	287.851	5863.31	4	319.755	5798.75	4	308.111	5741.54	4	462.399	1657.77	1	280.27	5980.73	4	315.015	5733.58	4	317.519	6015.06	4	461.691	1713.12	1	279.217	6275.41	4	281.704	6144.58	4	298.374	6470.76	4	278.072	6243.45	4	301.323	5935.96
286.525	6220.95	4	294.407	6418.2	4	314.011	6209.53	4	467.832	1709.41	1	293.714	6245.08	4	320.218	5761.47	4	310.992	5822.01	4	467.645	1543.71	1	288.924	5944.67	4	317.127	6090.31	4	319.888	5599.74	4	465.33	1653.89	1	283.604	6195.65	4	298.129	6305.54	4	305.402	5895.93	4	285.687	6000.34	4	306.703	5549.44
296.628	5949.19	4	307.535	5730.06	4	318.461	6004.26	4	474.357	1739.83	1	296.155	6158.05	4	323.609	5802.68	4	324.162	6101.06	4	468.204	1621	1	289.923	5758.51	4	318.321	5963.36	4	320.266	5930.98	4	465.401	1574.7	1	300.989	5690.17	4	298.768	6109.3	4	307.465	6170.16	4	289.122	5854.89	4	306.978	5820.61
297.359	5971.46	4	308.069	5789.36	4	321.078	6201.71	4	475.632	1673.14	1	296.399	6113.83	4	323.646	6033.09	4	331.994	5845.64	4	468.258	1687.89	1	294.503	6031.92	4	318.634	6154.42	4	321.136	5977.94	4	474.606	1669.57	1	301.138	6128.15	4	301.625	5810.97	4	311.204	6421.92	4	293.895	5818.2	4	308.914	6177.25
299.969	5991.62	4	310.363	5803.34	4	321.136	5728.43	4	475.755	1552.95	1	301.308	5669.92	4	326.874	5560.91	4	334.065	5700.93	4	469.47	1632.42	1	297.885	5775.79	4	322.945	5826.71	4	325.798	5750.67	4	475.308	1679.42	1	302.34	5795.15	4	304.508	5898.03	4	311.806	5951.02	4	294.474	6243.52	4	309.624	5702.11
300.225	5913.75	4	311.609	6332.19	4	322.291	6419.63	4	478.075	1687.61	1	302.778	5906.66	4	328.5	6297.98	4	334.231	5961.61	4	476.169	1660.23	1	297.942	5856.32	4	323.881	6220.92	4	328.764	5745.67	4	476.074	1624.55	1	305.556	5676.47	4	307.649	6238.45	4	313.392	5877.14	4	296.254	5729.68	4	310.495	5777.01
301.571	5870.61	4	314.807	6069.76	4	323.345	5991.89	4	478.74	1720.42	1	302.828	6042.58	4	328.882	6142.19	4	335.816	5732.07	4	476.606	1637.78	1	298.107	5801.17	4	324.179	5771.85	4	329.383	6035.71	4	477.102	1666.73	1	306.435	5878.23	4	308.357	5703.82	4	315.347	5922.79	4	297.091	5902.53	4	311.535	5740.67
305.214	6360.37	4	319.908	6060.49	4	324.759	5728.65	4	478.955	1691.26	1	303.455	6216.45	4	329.169	6221.99	4	337.913	5813.28	4	476.672	1672.02	1	299.474	6036.72	4	325.672	5949.66	4	332.709	5793.35	4	477.175	1693.4	1	306.512	5929.78	4	309.96	6365.74	4	316.384	5737.32	4	297.625	6058.96	4	311.893	6160.68
308.664	5809.44	4	320.346	6442.88	4	325.914	5610.89	4	479.172	1748.84	1	304.119	5818.67	4	329.741	5915.85	4	338.163	5897.1	4	477.342	1700.54	1	300.055	6128.33	4	326.232	5558.59	4	333.604	5967.13	4	478.012	1677.28	1	307.094	6376.26	4	309.996	6437.49	4	320.81	5813.68	4	297.856	6340.71	4	312.1	6380.9
309.34	6090.68	4	322.27	6244.98	4	328.659	5946.34	4	480.105	1677.55	1	312.041	5944.18	4	330.666	5761.28	4	339.545	5654.38	4	478.372	1681.02	1	300.652	6189.17	4	326.552	5893.53	4	333.871	5669.51	4	479.106	1634.93	1	307.225	5986.09	4	310.19	5574.13	4	322.47	5904.23	4	298.108	5846.75	4	312.658	6067.1
310.688	5933.92	4	322.599	5924.55	4	328.885	5789.5	4	482.071	1654.77	1	314.487	5708.9	4	332.112	5723.45	4	340.656	5807.77	4	478.721	1625.31	1	301.655	5962.46	4	326.869	5726.37	4	334.098	5707.2	4	479.489	1600.84	1	307.553	5684.82	4	312.436	5949.48	4	323.037	6137.39	4	299.7	5621.66	4	313.238	5584.88
311.909	5793.4	4	323.202	6214.82	4	331.259	6181.15	4	483.362	1624.33	1	315.108	5855.16	4	332.125	6133.68	4	341.174	5730.46	4	478.898	1596.17	1	302.693	5960.61	4	327.021	6197.89	4	334.831	5684.93	4	479.601	1581.27	1	308.583	6084.65	4	314.248	6432.25	4	323.87	5784.7	4	300.516	6207.95	4	313.983	5516.23
314.448	5759.33	4	323.575	5889.94	4	335.368	5995.3	4	483.416	1668.52	1	316.15	5842.26	4	332.615	5868.88	4	343.292	6164.67	4	479.036	1604.71	1	304.295	5663.77	4	327.301	5871.81	4	337.61	5837.13	4	480.671	1696.32	1	308.847	5867.47	4	314.47	6374.46	4	326.499	5985.55	4	301.768	5762.79	4	315.106	5895.23
314.851	6167.7	4	324.66	5774.63	4	335.784	5840.46	4	483.962	1634.62	1	318.64	5780.46	4	333.685	5952.23	4	343.722	6248.22	4	479.698	1676.98	1	305.427	5922.93	4	327.424	6245.72	4	338.078	5760.43	4	483.325	1576.94	1	309.2	5803.77	4	314.539	6150.76	4	328.273	6145.04	4	301.856	6173.16	4	315.348	5782.55
315.103	5778.67	4	325.401	5723.15	4	335.967	6193.6	4	485.232	1587.84	1	318.917	5875.54	4	334.398	5728.42	4	344.107	5942.48	4	480.111	1645.64	1	308.061	6138.55	4	327.663	6002.76	4	338.13	5943.82	4	484.592	1680.55	1	309.332	5869.88	4	315.515	5868.54	4	328.479	6366.59	4	302.348	5954.36	4	316.193	5710.48
316.404	6266.1	4	326.421	5945.86	4	337.736	6163.64	4	486.506	1619.55	1	319.048	5772.98	4	335.251	5794.24	4	344.698	5613.51	4	481.589	1602.72	1	308.192	6272.74	4	327.78	5827.16	4	338.65	5866.76	4	484.937	1661.95	1	309.383	6203.07	4	316.173	5875.47	4	329.829	6278.84	4	303.006	5749.34	4	316.678	5653.89
316.807	5682.48	4	327.357	6148.3	4	338.272	5883.02	4	487.83	1617.94	1	319.922	5907.87	4	336.698	5964.47	4	345.066	5840.31	4	481.603	1564.88	1	310.41	6082.08	4	328.989	5945.08	4	338.788	5734.38	4	485.077	1715.31	1	309.852	5505.98	4	317.802	5853.64	4	330.926	5812.47	4	303.122	5866.2	4	317.06	6085.13
317.944	5968.75	4	328.357	5825.37	4	338.652	5861.22	4	488.172	1573.17	1	320.143	6158.62	4	337.269	5921.41	4	345.286	6136.61	4	481.909	1636.19	1	312.484	5819.59	4	330.316	5827.66	4	339.036	6154.37	4	485.196	1563.11	1	310.365	5732.55	4	322.192	5847.15	4	332.247	5559.78	4	303.31	5774.27	4	317.197	5774.61
319.194	5515.53	4	328.723	6046.04	4	339.704	5664.53	4	488.296	1614.22	1	321.133	5884.62	4	337.697	5837.52	4	349.498	6152.65	4	482.157	1785.39	1	312.868	6153.54	4	330.966	6041.17	4	340.808	5642.68	4	485.705	1606.11	1	310.818	5923.06	4	323.442	5642.61	4	332.275	6029.7	4	303.793	5980.45	4	317.995	6441.28
319.463	5807.19	4	328.856	6237.49	4	339.927	5712.79	4	488.605	1682.05	1	321.645	5836.68	4	338.652	5962.41	4	349.602	5715.3	4	482.819	1584.88	1	313.776	5794.84	4	331.535	5933.12	4	341.299	6238.84	4	485.76	1641.55	1	311.287	5780.81	4	323.829	5757	4	332.64	5825.84	4	303.898	6212.65	4	319.063	5776.52
319.643	5900.26	4	329.012	5843.93	4	340.467	6030.48	4	489.608	1623.64	1	322.326	6352.6	4	340.555	6102.49	4	352.729	5837.12	4	483	1681.29	1	314.121	5599.79	4	331.834	5710.78	4	341.606	6166.23	4	486.606	1658.23	1	311.391	5951.79	4	323.866	5644.06	4	333.05	6066.26	4	305.785	5609.74	4	319.067	5866.8
319.893	6065.21	4	329.451	5670.84	4	340.628	6276.73	4	490.944	1688.22	1	322.952	6167.36	4	341.414	5722.09	4	352.917	6228.78	4	483.192	1668.11	1	314.584	6178.93	4	332.195	5600.97	4	341.938	6235.05	4	486.658	1684.33	1	311.578	5902.85	4	324.126	6417.14	4	333.211	5958.81	4	306.298	5888.57	4	319.715	6069.92
320.871	6309.46	4	329.63	5874.74	4	340.79	5995.81	4	492.531	1681.56	1	323.138	5936.87	4	342.411	5740.57	4	353.588	5765.39	4	483.34	1641.73	1	314.826	6223.37	4	332.834	6115.53	4	342.323	5619.82	4	486.799	1596.9	1	313.097	6205.85	4	324.427	6225.85	4	333.644	5787.86	4	306.625	6210.08	4	320.94	5658.73
321.019	5978.52	4	330.15	5902.87	4	341.958	5573.81	4	492.556	1652.26	1	323.833	5768.85	4	342.768	5827.09	4	354.285	5979.47	4	483.404	1591.23	1	315.188	5788.08	4	332.968	5851.54	4	342.808	5902.58	4	486.95	1708.78	1	313.117	5852.69	4	325.295	5747.59	4	335.274	5957.7	4	308.399	5802.16	4	321.295	5478.24
321.384	5781.67	4	330.273	6101.46	4	342.121	6316.33	4	493.812	1716.41	1	324.731	5808.14	4	342.881	5726.5	4	354.321	6251.95	4	484.317	1752.01	1	316.666	6239.98	4	333.296	5829.15	4	343.062	5706.18	4	487.161	1601.02	1	313.261	5825.52	4	326.745	5616.66	4	335.384	5674.57	4	308.807	6097.94	4	322.64	5727.59
322.835	5762.39	4	330.957	5924.23	4	342.265	5996.66	4	494.166	1583.85	1	325.361	5957.78	4	343.225	5645.28	4	354.574	5744.01	4	485.653	1678.8	1	316.796	5758.68	4	333.367	6111.29	4	343.187	5691.19	4	487.319	1632.57	1	313.37	5724.86	4	327.887	5908.5	4	336.276	6062.11	4	309.119	5866.39	4	322.847	5516.03
323.793	5789.14	4	332.364	5998.02	4	342.333	5912.32	4	494.524	1558.91	1	325.617	5732.4	4	343.502	5808.64	4	355.24	5651.99	4	485.946	1554.66	1	316.863	5937.47	4	333.397	5940.99	4	344.163	5762.25	4	487.421	1578.21	1	313.964	6319.99	4	327.978	5872.27	4	336.426	5778.12	4	309.405	6072.95	4	323.106	5801.26
324.198	6085.36	4	332.481	5649.66	4	342.345	6118	4	495.021	1660.06	1	326.892	5817.63	4	343.721	5870.47	4	355.397	5691.1	4	486.266	1518.6	1	317.445	5783.67	4	333.446	5779.85	4	344.633	6128.55	4	488.146	1657.41	1	314.632	5983	4	328.331	5925.28	4	337.113	5639.68	4	309.474	5673.01	4	323.337	5974.08
324.349	5907.24	4	333.048	6015.62	4	342.399	5508.26	4	495.145	1643.97	1	328.025	5707.68	4	343.753	6257.31	4	355.689	5959.39	4	486.3	1648.69	1	318.248	6008.85	4	335.655	6256.51	4	345.643	5743.62	4	488.396	1648.76	1	314.795	5920.37	4	328.518	5682.36	4	337.733	5607.98	4	309.751	5668.05	4	323.386	6053.69
324.549	5857.9	4	333.86	5996.45	4	342.803	5554.37	4	495.588	1692.3	1	329.432	6222.77	4	344.652	5851.2	4	358.045	5601.7	4	486.347	1787.65	1	318.587	5792.12	4	335.882	5689.99	4	345.928	5889.97	4	489.181	1641.12	1	315.673	6025.73	4	328.936	5289.19	4	337.871	5670.68	4	309.954	6018.99	4	324.558	5881.43
325.359	6202.11	4	334.665	6389.4	4	342.822	6131.87	4	495.719	1608.04	1	334.17	5636.38	4	344.901	5838.81	4	360.63	5480.15	4	486.393	1516.53	1	318.6	5959.19	4	335.882	6168.7	4	346.08	5753.79	4	489.393	1623.06	1	315.861	6266.38	4	329.064	5780.41	4	337.967	5791.69	4	310.31	5994.11	4	324.797	5644.85
325.393	6035.14	4	334.97	5588.14	4	342.839	6186.93	4	496.449	1648.1	1	334.79	5592.74	4	345.053	6433.56	4	361.657	6079.95	4	486.504	1610.66	1	318.772	5952.09	4	336.038	5981.19	4	346.398	5969	4	489.463	1621.12	1	315.889	5954.02	4	329.341	5779.65	4	338.165	5890.25	4	310.583	5714.85	4	325.047	5447.36
325.817	5650.27	4	334.989	5771.41	4	343.3	6002.12	4	497.273	1528.6	1	334.852	6085.23	4	345.236	5875.59	4	361.707	5810.37	4	487.784	1643.69	1	318.81	6005.93	4	336.089	5733.36	4	347.126	5734.82	4	489.674	1641.29	1	316.031	5826.58	4	329.873	6279.75	4	339.038	5637.43	4	310.818	6159.42	4	326.109	6046.97
325.841	5817.81	4	335.627	6307.41	4	343.94	6135.45	4	498.034	1671.01	1	335.456	6122.17	4	346.02	5781.3	4	362.359	5579.79	4	487.975	1676.12	1	318.993	5975.44	4	336.627	6096.63	4	347.212	5865.31	4	489.87	1710.61	1	317.592	5749.27	4	329.903	5677.11	4	339.417	6208.9	4	310.975	6327.25	4	326.371	5547.11
326.122	5918.02	4	335.882	5810.71	4	344.572	6150.62	4	498.112	1683.93	1	335.504	5876.85	4	346.218	6275.59	4	362.982	5549.61	4	488.196	1683.97	1	319.404	5985.11	4	336.64	5730.21	4	347.291	5902.93	4	489.916	1699.03	1	319.19	5906.13	4	330.902	5837.91	4	339.614	5812.36	4	311.016	5912.3	4	326.831	5910.06
327.326	5653.91	4	336.015	6387.59	4	344.874	5674.99	4	498.79	1568.46	1	335.951	5672.44	4	346.307	5505.9	4	363.127	6061.51	4	488.247	1616.33	1	319.504	5945.62	4	337.18	5766.44	4	347.594	5675.32	4	490.411	1707.77	1	320.303	5825.08	4	331.33	6158.85	4	339.828	5622.52	4	311.302	5644.78	4	327.086	6271.83
327.356	5710.78	4	336.692	5990.04	4	345.281	5996.14	4	498.903	1674.41	1	336.056	5942.14	4	347.581	6091.57	4	363.19	5770.57	4	488.549	1709.48	1	319.548	6049.12	4	337.296	6203.5	4	347.656	6112	4	491.579	1622.47	1	320.387	5826.42	4	331.589	5764.64	4	339.928	5673.55	4	311.634	6173.09	4	327.228	5742.43
327.868	5621.06	4	336.748	5999.25	4	345.83	6060.31	4	499.189	1542.16	1	336.77	6177.26	4	347.668	5986.29	4	363.249	5878.22	4	489.248	1659.29	1	319.785	5985.76	4	337.416	6157.3	4	348.121	5888.41	4	491.727	1797.66	1	320.589	5730.86	4	331.738	6010.18	4	340.043	5635.62	4	311.723	5812.04	4	327.707	6063.91
328.046	6085.4	4	336.846	5889.93	4	346.08	5954.64	4	499.362	1733.04	1	336.981	5732.21	4	347.923	5747.84	4	364.347	5770.91	4	489.564	1729.13	1	319.82	6081.64	4	337.934	5756.5	4	348.139	5824.76	4	491.729	1639.22	1	321.611	6290.45	4	332.097	6032.24	4	341.409	5910.53	4	312.174	6029.65	4	327.755	5572.66
328.104	5875.94	4	336.914	5650.61	4	346.441	5805	4	499.372	1637.36	1	337.131	5932.19	4	348.756	5797.2	4	364.596	5805.62	4	489.691	1608.21	1	320.736	5746.84	4	337.954	6136.8	4	348.331	5705.52	4	492.019	1630.49	1	321.771	5808.1	4	332.102	6051.34	4	341.526	5665.21	4	312.261	5807.02	4	328.243	5911.84
328.162	6306.45	4	336.978	5751.17	4	346.474	5738.84	4	499.938	1742.11	1	337.261	5733.87	4	349.44	5650.05	4	365.226	6051.3	4	489.79	1618.19	1	320.855	5781.64	4	338.276	5671.45	4	349.407	5766.92	4	492.08	1638.8	1	324.032	6599.93	4	332.222	5760.49	4	341.599	5796.52	4	312.407	5866.76	4	328.436	6101.63
328.343	5862.96	4	337.681	5764.56	4	346.475	5699.59	4	500.057	1629.99	1	337.309	5739.9	4	349.495	5764.79	4	365.423	5591.39	4	490.355	1606.69	1	320.89	5808.05	4	338.625	5853.46	4	349.787	5698.23	4	492.438	1608.42	1	324.24	5655.09	4	332.683	5915.07	4	341.753	6084.82	4	312.451	5705.09	4	328.624	5796.3
328.855	5924.75	4	338.005	5881.37	4	347.073	5741.98	4	500.214	1669.99	1	337.68	5786.21	4	349.608	5764.32	4	365.842	5748.83	4	490.54	1680.38	1	320.917	6165.23	4	339.061	5837.01	4	349.895	5788.14	4	492.953	1646.29	1	324.373	5917.56	4	332.756	5887.57	4	341.979	5742.44	4	312.457	5729.54	4	328.711	5676.2
328.916	5788.33	4	338.106	5696.29	4	347.569	6164.64	4	500.425	1573.26	1	338.028	6074.34	4	350.132	6084.8	4	366.355	5796.63	4	490.989	1626.32	1	321.11	5666.36	4	339.163	5943.42	4	350.472	6317.98	4	492.969	1606.28	1	324.737	6141.08	4	333.006	5793.89	4	342.571	5844.44	4	312.588	6044.93	4	329.669	5655.74
328.923	5450.86	4	338.299	5714.21	4	347.739	5887.94	4	501.32	1704.99	1	339.585	5694.99	4	350.652	6233.01	4	366.409	5727.23	4	491.295	1596.72	1	321.965	5994.42	4	339.181	5455.66	4	350.907	5858.82	4	493.142	1596.48	1	324.973	6103.98	4	333.388	5649.63	4	342.942	5739.62	4	313.94	6086.55	4	329.865	5578.16
329.1	5938.43	4	338.463	5780.48	4	348.085	5835.78	4	501.356	1646.53	1	339.626	5700.56	4	350.937	5788.54	4	366.492	5770.3	4	491.344	1633.51	1	322.287	5827.39	4	339.326	6124.62	4	351.041	5646.98	4	493.449	1651.14	1	325.022	6219.84	4	334.147	6151.33	4	343.283	5697.86	4	314.311	6005.58	4	330.059	5640.26
330.052	6187.25	4	338.575	5812.99	4	348.176	5976.07	4	501.429	1699.71	1	339.904	5901.47	4	351.454	6312.35	4	367.496	6190.54	4	491.453	1654.05	1	322.532	6090.99	4	339.518	5673.98	4	352.645	5898.56	4	494.116	1615.13	1	325.327	5769.24	4	334.547	5808.37	4	343.349	6120.84	4	314.348	6116.89	4	330.319	5762.15
330.083	6019.75	4	338.698	5750.17	4	348.786	5719.01	4	501.539	1702.18	1	339.91	6465.98	4	351.542	6043.13	4	367.546	5980.07	4	492.284	1682.48	1	322.915	5570.01	4	339.831	5800.01	4	352.676	5843.6	4	494.119	1561.84	1	325.892	5708.36	4	334.729	5858.05	4	343.514	6113.96	4	314.765	5709.85	4	330.373	5785.26
330.184	6141.73	4	338.739	5997.68	4	349.258	5822.87	4	501.599	1733.98	1	340.047	5488.49	4	352.198	5735.12	4	367.583	6346.01	4	492.469	1741.48	1	322.937	5972.25	4	340.414	5542.72	4	352.981	6120.51	4	494.145	1678.41	1	326.577	5796.93	4	335.997	5701.93	4	344.063	5463.72	4	314.838	5902.63	4	330.744	6128.78
330.883	5498.66	4	338.765	5872.5	4	349.441	6052.22	4	501.835	1768.29	1	341.481	6410.27	4	352.298	6293.32	4	367.775	5777.63	4	493.225	1666.17	1	323.177	5735.62	4	340.462	5875.02	4	353.114	5737.55	4	494.643	1612.4	1	326.668	5770.16	4	336.049	6115.15	4	344.086	5921.93	4	316.137	5683.53	4	330.772	6056.53
331.243	5480.14	4	339.192	5789.51	4	350.172	5797.98	4	501.886	1633.65	1	341.778	5815.22	4	352.429	6150.44	4	368.137	5819.2	4	493.331	1661.15	1	323.561	5986.41	4	340.513	5937.64	4	353.755	5819.27	4	494.821	1647.6	1	326.79	5869.32	4	336.11	6182.72	4	344.157	5688.23	4	316.644	5562.99	4	330.857	5730.24
331.556	5833.98	4	339.586	5767.11	4	350.31	5654.23	4	502.099	1703.93	1	342.064	5759.6	4	352.471	6400.08	4	368.303	5780.8	4	493.544	1657.67	1	323.869	6236.86	4	341.197	5776.78	4	354.03	6195.16	4	495.076	1642.98	1	326.826	5570.01	4	336.359	5785.88	4	344.158	6130.22	4	316.851	6312.25	4	331.259	5575.05
331.613	6254.02	4	339.65	6178.03	4	350.527	6195.26	4	502.187	1802.89	1	342.158	5744.34	4	352.628	5807.41	4	368.501	6058.22	4	493.567	1658.81	1	323.898	5895.5	4	341.317	5808.18	4	354.693	5653.45	4	495.091	1679.03	1	326.844	5843.69	4	336.435	6010.43	4	344.187	6263.41	4	317.345	6177.54	4	331.372	5570.08
331.769	6156.28	4	339.671	6194.09	4	350.956	5614	4	502.393	1545.87	1	342.345	5919.22	4	353.064	5606.11	4	369.022	5738.85	4	493.695	1711.14	1	323.967	5838.94	4	341.501	6236.38	4	354.841	5374.23	4	495.119	1729.86	1	328.014	6222.33	4	336.79	5880.08	4	344.337	5809.43	4	318.532	5833.99	4	331.533	5854.7
331.964	5525.69	4	340.013	6306.36	4	351.319	5898.86	4	502.595	1634.4	1	342.914	5947.97	4	353.341	5552.45	4	369.443	6044.13	4	493.807	1581.3	1	324.357	6166.06	4	341.524	5799.69	4	354.87	6118.81	4	495.205	1587.64	1	328.089	5849.17	4	337.269	5690	4	345.156	6146.11	4	318.787	5896.92	4	331.555	5779.27
332.227	5758.07	4	340.117	5829.88	4	351.64	6179.39	4	502.656	1802.62	1	343.058	5531.99	4	353.609	5679.35	4	369.767	6142.79	4	493.83	1711.95	1	324.471	5792.99	4	341.759	5765.39	4	354.911	5903.77	4	495.365	1643.26	1	328.174	5845.32	4	337.403	5795.94	4	345.46	5848.07	4	318.809	5701.48	4	331.721	5703.81
332.522	6224.55	4	340.147	5634.03	4	351.665	5578.44	4	502.846	1625.93	1	343.534	6034.39	4	354.071	5812.77	4	370.505	5839.55	4	494.169	1566.74	1	324.88	6117.4	4	342.652	5837.32	4	355.016	5723.84	4	495.681	1715.68	1	328.258	6143.84	4	337.532	6113.36	4	345.471	6241.12	4	318.851	6052.71	4	331.852	6310.86
332.543	5800.76	4	340.217	5691.71	4	351.796	5649.97	4	503.617	1651.11	1	343.657	6074.57	4	354.313	6059.52	4	370.931	5828.66	4	494.235	1579.66	1	325.178	5759.32	4	342.663	5750.94	4	355.135	5697.2	4	495.985	1746.29	1	328.276	6232.09	4	337.936	6119.88	4	345.645	5792.48	4	318.926	6033.73	4	331.896	6226.12
332.781	6111.51	4	340.444	5619.4	4	352.595	5766.28	4	503.662	1766.65	1	344.536	5627.44	4	354.829	6087.65	4	371.504	5896.64	4	495.187	1780.4	1	325.751	5953.7	4	342.815	6090.69	4	355.227	5673.75	4	496.133	1781.74	1	328.381	5706.46	4	338.186	6173.7	4	346.468	5915.04	4	319.372	5866.58	4	331.925	6115.67
332.97	5842.89	4	340.567	6182.8	4	352.838	5508.87	4	503.773	1654.59	1	345.129	6145.35	4	354.937	5806.31	4	371.785	6106.73	4	495.324	1615.16	1	325.941	6117.46	4	343.089	5622.75	4	355.243	5880.42	4	496.675	1639.5	1	328.531	5878.51	4	338.55	5877.82	4	346.588	5864.92	4	320.464	5939.87	4	332.049	5747.98
333.072	6166.66	4	341.128	5765.01	4	353.027	6183.3	4	503.829	1748.77	1	345.886	5671.71	4	355.472	5710.89	4	371.787	5779.61	4	495.484	1645.93	1	325.964	5675.97	4	343.098	5677.6	4	355.669	6123.25	4	497.274	1690.21	1	328.635	5841	4	338.708	5661.53	4	347.424	6238.39	4	320.683	5744.25	4	332.058	5658.91
333.51	6273.17	4	341.635	5728.61	4	353.182	6116.81	4	503.859	1672.63	1	346.622	5899.22	4	355.738	5928.5	4	373.219	5727.29	4	495.511	1842.86	1	326.16	6083.05	4	343.251	6363.34	4	356.091	5728.3	4	497.445	1582.06	1	328.636	5530.83	4	338.954	6038.08	4	347.531	6026.63	4	320.76	5886.11	4	333.239	5990.94
333.882	5469.31	4	341.696	5571.78	4	353.228	5741.66	4	504.488	1587.74	1	346.769	5546.09	4	355.893	5739.97	4	373.544	5620.94	4	495.864	1706.51	1	327.043	6171.51	4	343.29	6189.35	4	356.108	6027.37	4	497.446	1610.27	1	328.913	6148.69	4	339.562	5618.63	4	348.028	5706.1	4	320.837	5737.98	4	333.774	5751.74
334.002	6084.56	4	341.807	6073.06	4	353.304	5833.23	4	504.775	1639.03	1	347.054	5679.94	4	356.418	5660.18	4	373.621	6047.61	4	495.892	1557.97	1	327.304	6255.44	4	343.325	6029.22	4	356.838	5998.87	4	497.677	1635.05	1	328.95	6373.28	4	339.58	6424.5	4	348.031	6258.97	4	320.848	6056.73	4	334.242	5828.41
334.017	6116.47	4	341.82	5677.21	4	353.865	5866.42	4	504.937	1696.89	1	347.182	5831.42	4	356.851	5594.07	4	373.986	6217.31	4	496.004	1696.87	1	327.364	6178.08	4	343.327	5652.49	4	356.905	5751.87	4	498.001	1650.3	1	328.955	5659.16	4	339.611	6445.49	4	348.157	5798.94	4	321.013	5720.58	4	334.338	6152.15
334.052	5881.58	4	342.215	5855.47	4	354.019	6323.77	4	505.506	1595.65	1	347.564	5620.98	4	357.347	5813.75	4	374.67	5725.03	4	496.083	1699.2	1	327.633	5840.08	4	343.581	5841.52	4	357.142	5879.17	4	498.004	1592.75	1	329.708	6033.89	4	339.705	5742.31	4	348.888	5541.43	4	321.248	5682.97	4	334.574	5801.22
334.151	5859.93	4	342.719	5743.3	4	354.251	5929.5	4	505.689	1672.13	1	348.314	5409.61	4	357.354	6064.82	4	375.34	5733.67	4	496.22	1631.21	1	327.671	6327.69	4	343.618	6266.92	4	357.295	5713.15	4	498.302	1590.6	1	329.739	6205.31	4	339.775	5714.95	4	348.899	6002.49	4	321.472	5793.79	4	334.618	5640.26
334.882	5824.27	4	342.765	5885.82	4	354.504	6123	4	505.737	1775.8	1	348.461	6231.87	4	357.475	5786.01	4	375.773	5760.27	4	496.562	1691.48	1	328.069	6047.8	4	343.86	6070.94	4	357.361	5950.6	4	498.352	1678.08	1	329.797	5812.12	4	340.213	6181.53	4	349.287	6259.27	4	321.587	5648.23	4	334.677	5472.02
335.478	5669.75	4	342.871	5822.11	4	354.53	5966.14	4	505.798	1808.32	1	348.625	5758.95	4	357.785	5867.12	4	375.894	5553.02	4	496.67	1684.19	1	328.137	5609.52	4	344.446	5877.47	4	357.423	5756.69	4	498.414	1743.17	1	329.891	5821.09	4	340.398	5737.31	4	349.369	5922.18	4	321.694	5951.7	4	334.823	5878.74
335.608	5784.76	4	342.978	6270.05	4	354.714	5828.16	4	506.202	1628.35	1	348.782	5845.26	4	357.79	5535.25	4	375.894	5768.08	4	496.808	1655.15	1	328.369	5834.35	4	344.479	6053.45	4	357.64	5546	4	498.723	1780.86	1	330.747	6195.83	4	340.783	6231.85	4	349.45	6088.53	4	321.813	6275.95	4	334.946	6037.14
335.765	5851.73	4	343.374	5705.7	4	354.857	6092.08	4	506.378	1583.78	1	348.917	5762.24	4	357.897	6122.1	4	375.93	5735.09	4	497.397	1555.72	1	328.627	6333.31	4	344.574	6060.47	4	357.675	6108.46	4	499.044	1656.24	1	330.772	6015.68	4	341.03	5767.76	4	349.827	5819.99	4	321.818	5731.58	4	335.186	5954.78
335.816	6198.74	4	343.664	5903.16	4	355.266	5630.96	4	506.456	1758.66	1	348.982	6085.86	4	358.168	5746.78	4	375.957	5773.96	4	497.45	1675.86	1	328.847	5675.35	4	344.581	5974.55	4	357.937	5769.99	4	499.114	1603.21	1	331.066	5795.5	4	341.116	5825.31	4	349.844	5686.53	4	321.977	6046.44	4	335.204	5714.99
336.653	5789.41	4	343.73	5823.3	4	355.276	5540.71	4	506.584	1620.31	1	349.16	5690.16	4	358.314	6072.29	4	376.186	5661.98	4	497.468	1628.4	1	329.831	5981.55	4	344.636	5814.26	4	357.977	5927.55	4	499.447	1713.37	1	331.217	5813.18	4	341.531	6361.36	4	349.906	5932.8	4	322.511	5706.8	4	335.244	5746.75
336.742	5806.26	4	343.779	5889.86	4	355.325	5660.87	4	506.641	1594.72	1	349.626	6259.35	4	358.464	6198.84	4	376.611	6104.95	4	497.5	1542.4	1	329.9	6264.26	4	344.839	5876.89	4	357.998	5890.72	4	500.523	1619.79	1	331.3	6279.34	4	341.977	6401.78	4	349.914	6086.98	4	322.566	5850.34	4	335.363	5451.78
336.861	6162.57	4	343.94	5638.21	4	355.468	5973.87	4	506.929	1583.1	1	350.538	6243.91	4	358.529	5948.36	4	377.014	6017.23	4	497.53	1661.94	1	329.94	5971.03	4	344.957	5794.16	4	358.096	5959.46	4	500.654	1610.28	1	331.612	5885.98	4	342.019	5568.98	4	350.002	5982.36	4	322.586	6142.14	4	335.584	5728.46
336.989	5923.22	4	345.017	5719.24	4	355.905	5812.51	4	507.196	1635.46	1	351.158	5841.81	4	358.813	5821.2	4	377.204	5816.44	4	497.575	1642.22	1	329.981	5595.61	4	345.601	5883.8	4	358.622	5676.89	4	500.754	1634.47	1	331.664	5829.02	4	342.068	5810.33	4	350.566	5760.77	4	322.816	5897.78	4	335.9	5684.41
337.479	5793.02	4	345.04	5786.28	4	356.016	5768.25	4	507.324	1611.74	1	351.267	5900.08	4	359.027	5978.82	4	377.232	5777.64	4	497.59	1637.46	1	330.105	6191.86	4	345.725	6033.94	4	358.738	5898.24	4	500.82	1702.08	1	331.868	6276.67	4	342.229	5858.71	4	350.63	6110.76	4	322.882	5875.59	4	336.179	5775.01
337.568	5555.66	4	345.516	6042.4	4	356.393	5537.15	4	507.39	1764.39	1	351.322	5875.16	4	359.191	5483.84	4	377.252	5543.36	4	497.717	1628.11	1	330.424	5779.34	4	346.017	5865.44	4	359.148	5853.04	4	501.088	1650.02	1	331.92	5892.4	4	342.347	5655.73	4	350.92	5849.57	4	323.517	6119.64	4	336.289	5981.73
338.334	6057.38	4	345.689	5764.14	4	356.563	5694.66	4	507.51	1534.24	1	351.5	5855.75	4	359.722	6162.21	4	377.282	5697.44	4	497.757	1622.09	1	330.535	6123.41	4	346.057	5846.15	4	359.45	6242.53	4	501.28	1568.13	1	331.983	5715.2	4	342.468	5725.47	4	350.929	5798.34	4	323.602	5852.39	4	336.526	5709.38
338.409	6239.99	4	345.866	5918.09	4	356.579	5858.61	4	507.602	1588.58	1	351.81	5674.46	4	359.956	5965.45	4	377.299	6053.72	4	498.317	1663.77	1	331.171	5740.99	4	346.282	5652.43	4	359.51	5804.94	4	501.452	1575.12	1	332.187	5638.34	4	342.702	5585.95	4	351.07	5661.52	4	323.755	5786.97	4	336.709	5664.23
338.861	5687.67	4	346.064	6287.08	4	356.616	5904.81	4	507.603	1628.39	1	352.037	5757.79	4	360.079	6249.99	4	377.344	5952.1	4	498.35	1560.65	1	331.331	6237.07	4	346.292	5757.29	4	359.668	5646.47	4	501.691	1574.41	1	332.259	6018.26	4	343.049	5635.87	4	351.21	5879.54	4	323.885	5737	4	336.961	5724.84
338.96	5650.89	4	346.27	5772.16	4	356.906	6212.11	4	507.708	1553.92	1	352.25	5806.51	4	360.318	5847.17	4	377.379	5599.31	4	498.396	1660.77	1	331.546	5942.88	4	346.57	6259.87	4	359.805	5953.71	4	501.757	1718.12	1	332.445	5878.15	4	343.132	6071.24	4	351.273	6180.44	4	324.298	6329.08	4	337.028	6058.52
339.252	5766.91	4	346.271	5780.62	4	356.954	5887.36	4	507.727	1620.79	1	352.252	5848.94	4	360.775	5921.81	4	377.598	6268.23	4	498.438	1599.57	1	331.557	5646.37	4	346.748	5621.42	4	359.866	5614.79	4	501.876	1644.98	1	332.816	6101.9	4	343.967	5854.51	4	351.68	5564.06	4	324.331	5782.86	4	337.059	5524.96
339.334	5607.89	4	346.294	6112.34	4	357.359	6020.52	4	507.778	1634.55	1	352.359	6069.79	4	360.948	5793.04	4	377.631	6239.55	4	498.632	1569.61	1	331.559	5896.97	4	346.811	6123.31	4	359.98	5833.34	4	501.909	1701.69	1	332.899	5853.92	4	344.396	5905.97	4	351.709	6131.02	4	324.366	6055.91	4	337.079	6020.6
339.82	5965.59	4	346.345	5939.55	4	357.638	6183.47	4	507.78	1560.82	1	352.513	5825.23	4	361.098	6366.19	4	377.834	5551.2	4	498.7	1640.19	1	331.593	5820.76	4	346.839	6172.79	4	360.223	5933.64	4	502.177	1717.61	1	332.923	5953.98	4	344.735	5903.28	4	351.76	6310.46	4	324.382	5798.86	4	337.275	5748.31
340.134	5701.66	4	346.39	5881.09	4	357.728	6143.17	4	508.752	1590.06	1	352.585	5665.61	4	361.253	5987.1	4	377.979	5719.93	4	498.775	1628.98	1	331.883	6003.12	4	347.158	5834.18	4	360.314	6143.82	4	502.545	1638.28	1	333.165	6166.48	4	344.748	6229.66	4	352.076	6242	4	324.551	5633.72	4	337.311	5438.6
340.276	5920.74	4	346.531	5890.01	4	358.074	6034.87	4	509.039	1718.92	1	353.278	5797.52	4	361.399	5606.39	4	378.139	5781.83	4	498.953	1603.38	1	332.021	5882.94	4	347.256	5693.68	4	360.618	5827.9	4	503.001	1675.43	1	333.355	5715.87	4	344.928	6015.15	4	352.133	6129.64	4	324.582	5737.55	4	337.456	6214.09
340.627	5730.37	4	346.542	5989.61	4	358.318	5423.08	4	509.113	1572.15	1	353.3	5705.78	4	361.602	5827.19	4	378.237	6053.16	4	499.016	1659.84	1	332.162	6225.14	4	347.36	5662.94	4	360.804	5713.19	4	503.05	1631.31	1	333.777	6139.49	4	345.4	5725.86	4	352.23	5803.18	4	324.679	6128.6	4	337.725	5600.47
340.927	5922.54	4	346.72	5933.64	4	358.361	6250.49	4	509.252	1699.81	1	353.433	5637.74	4	361.823	5837.93	4	378.539	5625.2	4	499.302	1593.97	1	332.515	5956.59	4	347.736	5715.73	4	360.881	5756.99	4	503.089	1698.18	1	333.961	6344.49	4	345.471	5514.08	4	352.326	5667.75	4	325.094	5663.24	4	337.997	5732.99
341.11	6286.84	4	346.895	5787.03	4	358.401	5711.38	4	509.39	1637.99	1	353.576	5688.83	4	362.072	6429.48	4	378.54	5813.92	4	499.418	1634.28	1	332.704	6132.95	4	347.901	5755.22	4	360.917	5804.99	4	503.297	1587.49	1	333.983	5998.5	4	345.527	5512.08	4	352.371	5687.85	4	325.215	5812.05	4	338.118	5802.35
341.207	5723.48	4	347.062	5837.71	4	358.699	5408	4	509.77	1647.93	1	353.767	5536.34	4	362.212	5561.49	4	379.915	5603.51	4	499.43	1696.42	1	332.714	5784.38	4	347.938	6179.45	4	361.028	5886.79	4	503.444	1643.79	1	333.987	5697.49	4	345.53	5924.32	4	352.693	6079.82	4	325.245	5725.65	4	338.402	6184.91
341.271	5883.37	4	347.24	5799.96	4	358.903	6019.3	4	510.138	1662.5	1	354.057	5821.88	4	362.428	6244.56	4	380.175	5998.53	4	499.507	1631.71	1	332.806	5604.56	4	348.01	5941.36	4	361.032	5637.64	4	503.469	1686.01	1	334.055	5955.65	4	345.672	5758.63	4	352.696	5718.07	4	325.558	5739.26	4	339.17	5612.32
341.986	5864.11	4	347.487	5905.24	4	358.906	6467.34	4	510.325	1774.13	1	354.082	5735.11	4	363.063	6011.93	4	380.379	5950.15	4	499.637	1703.51	1	332.837	6097.61	4	348.077	6138.85	4	361.116	5769.78	4	503.526	1683.08	1	334.156	6159.1	4	345.772	5815.64	4	353.544	5836.01	4	325.64	5786.57	4	339.222	6161.09
342.153	5902.68	4	348.056	5807.24	4	358.907	5682.15	4	510.606	1749.61	1	354.149	5905.7	4	363.123	5806.44	4	380.731	6103.13	4	499.701	1665.52	1	332.924	5688.27	4	348.256	6097.53	4	361.186	5723.19	4	503.618	1757.06	1	334.317	5937.77	4	345.89	5541.64	4	353.847	6039.81	4	325.798	5813.87	4	339.228	5707.83
342.225	5625.44	4	348.258	5782.8	4	359.023	6181.81	4	510.673	1638.24	1	354.373	6119.28	4	363.18	5612.53	4	380.858	5440.2	4	500.173	1681.47	1	332.996	6147.06	4	348.288	6144.85	4	361.576	5752.64	4	503.705	1606.46	1	334.933	5918.53	4	345.912	6126.16	4	353.934	5903.75	4	325.956	5762.42	4	339.401	5883.77
342.27	6282.58	4	348.457	5808.56	4	359.07	6129.96	4	510.745	1684.08	1	354.674	5674.57	4	363.249	5888.37	4	380.877	5694.6	4	500.23	1711.84	1	333.062	5845.26	4	348.314	5834.99	4	361.633	5638.21	4	503.811	1593.94	1	335.228	6013.71	4	346.329	5766.18	4	354.082	5568.98	4	325.964	5788.43	4	339.489	6244.9
342.285	5803.8	4	348.501	6072.19	4	359.144	5862.52	4	510.823	1665.61	1	354.87	5806.53	4	363.26	5480.09	4	380.89	5782.85	4	500.298	1595.87	1	333.119	5845.77	4	348.621	5663.59	4	361.668	5681.74	4	503.835	1618.9	1	335.416	5859.52	4	346.409	5980.37	4	354.445	5590.31	4	326.239	5713.02	4	339.571	5819.81
342.501	5730.59	4	348.692	6110.67	4	359.312	6180.63	4	510.971	1608.85	1	354.962	5947.89	4	363.35	6003.18	4	381.015	5714.31	4	500.334	1642.12	1	333.201	5892.2	4	348.682	6024.6	4	361.709	5727.52	4	503.856	1560.14	1	335.592	6084.16	4	346.46	5507.98	4	354.533	6192.8	4	326.275	5724.1	4	339.594	5850.47
342.791	5841.96	4	348.786	5744.16	4	359.328	5703.99	4	511.005	1580.7	1	355.334	5723.93	4	363.796	5689.41	4	381.042	5624.78	4	500.959	1715.16	1	333.684	5609.75	4	348.764	5980.09	4	362.153	5957.71	4	503.983	1607.57	1	335.836	5836.93	4	346.483	5924.83	4	354.889	6014.04	4	326.335	5921.08	4	339.787	6126.63
342.838	6141.36	4	349.022	5897.2	4	359.328	5641.26	4	511.129	1653.72	1	355.364	5869.57	4	363.82	5779.14	4	381.127	5757.34	4	501.125	1605.59	1	334.13	5731.33	4	349.469	6007.42	4	362.793	5805.41	4	503.989	1724.9	1	335.952	5971.66	4	346.702	5749.65	4	354.9	6187.3	4	326.399	5703.88	4	339.903	5507.4
342.895	5729.56	4	349.174	5703.24	4	359.519	5633.59	4	511.255	1641.03	1	355.612	5933.34	4	363.96	6145.98	4	381.751	5944.5	4	501.128	1750.05	1	334.225	5633.57	4	349.655	5873.62	4	362.815	5819.08	4	504.021	1684.64	1	336.326	5834.3	4	346.972	6327.18	4	355.044	6102.46	4	326.593	5767.77	4	340.117	5734.01
343.156	5841.51	4	349.322	6028.98	4	359.555	5823.15	4	511.319	1734.72	1	355.647	6075.48	4	363.977	5683.67	4	381.78	5728.35	4	501.22	1585.69	1	334.371	5636.39	4	349.916	5958	4	362.867	5768.52	4	504.228	1659.83	1	336.387	6030.87	4	347.02	5864.97	4	355.139	6020.73	4	326.835	5976.78	4	340.145	6143.09
343.462	5876.68	4	349.444	6062.29	4	359.632	5973.89	4	511.456	1662.7	1	355.752	5697.45	4	364.796	6252.86	4	382.112	6054.32	4	501.222	1658.12	1	334.389	6026.67	4	349.992	6181.38	4	363.15	6018.13	4	504.328	1615.57	1	336.463	6130.13	4	347.087	6041.2	4	355.177	5621.72	4	327.024	5864.14	4	340.401	5652.16
343.835	5820.95	4	349.488	6154.94	4	359.641	5801.19	4	511.459	1635.04	1	355.862	5850.59	4	364.925	6065.53	4	382.167	5934.48	4	501.338	1648.49	1	334.45	5653.49	4	350.034	5765.59	4	363.216	5779.5	4	504.371	1622.59	1	336.572	6003.87	4	347.259	6108.71	4	355.231	5681.59	4	327.474	5816.08	4	340.527	5892.37
343.974	5677.7	4	349.613	5819.53	4	359.651	6245.01	4	511.487	1519.2	1	356.014	5851.84	4	365	5810.81	4	382.276	5967.87	4	501.422	1603.52	1	334.5	6242.51	4	350.171	6066.16	4	363.243	5584.28	4	504.494	1576.63	1	336.585	5754.3	4	347.451	6098.32	4	355.277	5503.38	4	327.483	5611.52	4	340.573	6015.47
344.057	6128.16	4	349.887	5992.47	4	359.804	5775.21	4	511.583	1782.57	1	356.179	5818.49	4	365.605	5874.69	4	382.278	5796.21	4	501.507	1640.32	1	334.581	6310.93	4	350.199	5714.56	4	363.389	5826.29	4	504.772	1707.04	1	336.818	5911.12	4	347.76	5987.02	4	355.283	5922.83	4	327.486	5850.5	4	340.84	5629.86
344.186	5431.84	4	350	6052.6	4	359.981	6061.26	4	511.605	1653.53	1	356.233	5692.31	4	366.371	5504.11	4	382.323	5658.56	4	501.697	1666.15	1	334.725	5980.67	4	350.673	5778.53	4	363.434	5886.82	4	504.954	1633.3	1	336.946	5700.83	4	347.877	5897.87	4	355.559	5969.13	4	327.651	5955.41	4	340.979	5637.59
344.745	5776.61	4	350.366	5869.35	4	360.568	5723.45	4	511.658	1621.7	1	356.409	5737.11	4	366.389	5675.02	4	382.49	6080.28	4	501.708	1656.19	1	334.747	5737.52	4	350.675	6219.5	4	363.456	5604.99	4	504.981	1616.48	1	337.468	5825.86	4	347.951	5733.11	4	355.615	5772.47	4	327.787	5812.53	4	341.168	5785.39
344.752	5809.16	4	350.558	5668.48	4	360.584	5669.15	4	511.844	1641.15	1	357.274	5847.18	4	366.649	5689.75	4	382.501	5488.39	4	502.003	1660.14	1	334.748	5912.41	4	350.812	6000.23	4	363.505	6118.47	4	505.045	1586.06	1	337.564	5796.77	4	348.08	5672.21	4	355.695	5679.44	4	327.967	5782.59	4	341.211	5665.99
345.028	5689.04	4	350.698	5642.53	4	360.794	5978.08	4	512.003	1541.1	1	357.389	5650.38	4	366.746	5920.93	4	382.94	5890.64	4	502.017	1600.77	1	334.963	6082.54	4	350.838	5879.35	4	363.567	6173.01	4	505.514	1657.45	1	337.637	5906.34	4	348.157	5907.46	4	355.745	5798.18	4	328.173	5899.15	4	341.313	5455.69
345.069	6103.86	4	350.848	6133.18	4	361.02	6046.91	4	512.191	1680.36	1	357.517	5745.89	4	366.766	5643.26	4	383.23	5790.21	4	502.02	1762.4	1	334.968	5811.56	4	351.107	6150.78	4	363.572	5776.22	4	505.656	1617.65	1	337.651	6123.51	4	348.224	5947.82	4	355.944	5603.29	4	328.237	6013.67	4	341.537	5963.04
345.173	5667.64	4	350.89	5797.56	4	361.06	5536.47	4	512.409	1680.96	1	357.688	5466.89	4	366.856	5829.39	4	383.251	5744.04	4	502.114	1591.78	1	334.994	5827.38	4	351.395	5657.53	4	363.605	5820.73	4	505.771	1700.16	1	337.867	6283.23	4	348.255	5510.1	4	356.197	5866.82	4	328.31	5911.98	4	341.58	5811.07
345.413	5846.38	4	350.952	5686.91	4	361.168	5994.96	4	512.477	1630.03	1	358.066	6033.76	4	366.857	5704.69	4	383.473	6201.97	4	502.179	1705.49	1	335.01	5863.29	4	351.421	5769.03	4	363.72	5913.56	4	505.908	1846.26	1	337.954	6293.36	4	348.629	5773.38	4	356.444	6169.1	4	328.92	5467.67	4	341.637	5723.62
345.518	5711.05	4	351.092	5971.41	4	361.171	5858.93	4	512.598	1556.93	1	358.227	6025.28	4	366.971	6200.11	4	383.536	6398.82	4	502.268	1542.53	1	335.19	5768.7	4	351.547	6267.91	4	363.8	6031.97	4	506.055	1643	1	338.213	6198.08	4	348.999	5960.2	4	356.506	5695.47	4	328.935	5692.59	4	341.728	5843.23
345.774	6012.1	4	351.213	6143.38	4	361.396	5657.81	4	512.905	1644.69	1	358.43	5651.08	4	366.994	5815.71	4	384.036	5746.36	4	502.397	1644	1	335.269	5744.83	4	351.758	5574.37	4	363.844	5760.02	4	506.077	1650.37	1	338.521	5908.09	4	349.24	6331.35	4	356.597	5637.12	4	329.084	5711.55	4	341.772	5770.26
345.856	5861.28	4	351.361	5737.14	4	361.903	6019.2	4	513.013	1612.64	1	358.547	5902.71	4	367.061	5790.92	4	384.266	5647.06	4	502.828	1733.18	1	335.478	5807.12	4	351.779	6101.06	4	363.915	5980.47	4	506.15	1630.19	1	338.708	5915.62	4	349.355	5805.42	4	356.807	5721.02	4	329.17	5939.11	4	341.778	5705.04
345.98	6318.39	4	351.386	6070.35	4	361.971	6087	4	513.051	1685.21	1	359.163	6014.77	4	367.169	5584.74	4	384.416	5892.81	4	503.018	1590.09	1	335.519	6035.75	4	352.176	5720.61	4	363.928	5839.13	4	506.195	1618.43	1	338.805	5642.91	4	349.389	6200.53	4	356.809	5406.02	4	329.486	6164.3	4	342.224	5725.95
345.983	5782.48	4	351.467	6107.88	4	362.06	5941.96	4	513.226	1648.14	1	359.445	5890.57	4	367.581	5847.23	4	384.709	6175.45	4	503.026	1590.08	1	335.663	6018.68	4	352.249	5924.45	4	364.029	6129.29	4	506.285	1556.06	1	338.854	5817.48	4	349.517	5762.36	4	356.841	5813.75	4	329.655	5995.62	4	342.272	5958.23
346.839	5965.87	4	351.597	6128.55	4	362.084	5853.2	4	513.286	1578.89	1	359.452	6014.23	4	367.583	6167.08	4	385.026	5914.94	4	503.059	1662.1	1	335.849	5732.02	4	352.276	5836.63	4	364.248	5982.55	4	506.299	1604.14	1	338.986	5698.42	4	349.544	6390.12	4	356.95	5653.88	4	329.695	6272.59	4	342.514	5972.99
347.07	5807.26	4	351.656	5862.98	4	362.087	6013.46	4	513.303	1727.5	1	359.509	6320.58	4	367.626	5584.29	4	385.284	5734.21	4	503.065	1728.57	1	336.411	5782.03	4	352.47	6263.32	4	364.251	5877.9	4	506.317	1638.1	1	339.333	6096.43	4	349.787	5777.82	4	356.991	5836.23	4	329.779	5604.25	4	342.78	5906.81
347.179	5403.45	4	351.74	6062.23	4	362.251	5798.93	4	513.316	1697.92	1	359.626	5540.12	4	367.947	5741.6	4	385.316	5716.32	4	503.182	1688.59	1	336.487	6015.18	4	352.502	5703.52	4	364.258	5856.71	4	506.445	1577.89	1	339.339	6241.68	4	349.953	5946.65	4	357.08	5693.76	4	329.818	5988.67	4	342.812	5729.28
347.324	5669.93	4	351.817	5758.09	4	362.45	5732.87	4	513.541	1587.77	1	359.654	5714.27	4	367.95	5993.39	4	385.354	5833.41	4	503.208	1561.62	1	336.654	5930.53	4	352.552	5831.63	4	364.511	5726.19	4	506.472	1628.38	1	339.349	6193.65	4	350.145	6131.62	4	357.212	5734.2	4	329.889	6145.16	4	342.827	5845.12
347.648	5839.06	4	351.897	5665.04	4	362.531	5795.24	4	513.638	1743.39	1	359.663	5840.64	4	368.032	6119.32	4	385.488	5713.84	4	503.276	1696.71	1	336.693	5587.82	4	352.569	5806.35	4	364.623	5697.11	4	506.62	1735.35	1	339.446	5796.88	4	350.45	5768.58	4	357.372	5506.48	4	329.943	5759.44	4	343.267	5831.27
347.757	6048.66	4	352.396	6095.66	4	362.583	5579.11	4	513.65	1552.08	1	359.781	5768.08	4	368.266	5527.72	4	385.603	5914.91	4	503.349	1551.43	1	336.704	5757.79	4	352.649	5873.29	4	364.823	5860.59	4	506.653	1626.73	1	339.462	6120.14	4	350.71	6264.37	4	357.516	6073.23	4	329.983	5514.69	4	343.428	5581.2
348.113	5414.22	4	353.198	6009.6	4	362.75	5611.22	4	513.702	1708.32	1	359.898	5704.19	4	368.622	5289.12	4	385.7	5521.96	4	503.361	1651.32	1	336.805	5711.26	4	352.704	5692.96	4	364.902	5796	4	507.064	1635.84	1	339.779	5853.35	4	350.736	5902.57	4	357.52	5631.54	4	330.13	5735.89	4	343.901	6010.2
348.155	5474.58	4	353.296	5713.04	4	362.788	5932.62	4	513.744	1685.82	1	359.971	5881.89	4	368.689	5744.82	4	385.829	5586.99	4	503.593	1640.04	1	336.902	6301.7	4	352.969	5866.91	4	365.06	5814.6	4	507.088	1642.67	1	339.898	5984.8	4	350.736	6007.7	4	357.663	5966.59	4	330.3	5881.13	4	344.37	5611.73
348.277	5746.96	4	353.315	5945.24	4	362.83	5971.68	4	513.759	1638.09	1	360.053	5637.35	4	368.809	5510.51	4	385.881	5817.18	4	503.835	1655.65	1	337.219	5750.58	4	353.032	5876.56	4	365.062	5826.58	4	507.193	1670	1	340.011	5754.5	4	350.851	5716.71	4	357.811	6127.07	4	330.674	5774.39	4	344.401	5803.26
348.503	5673.55	4	353.365	5865.52	4	362.842	5777.97	4	513.786	1719.58	1	360.1	5690.11	4	368.855	5727.98	4	385.888	5595.11	4	503.999	1702.78	1	337.256	5991.54	4	353.148	5919.01	4	365.071	5875.56	4	507.216	1672.45	1	340.012	6358.36	4	350.896	5709.14	4	357.946	5831.53	4	330.736	5796.62	4	344.42	5723
348.511	5586.85	4	353.494	5935.42	4	362.975	5781.5	4	513.797	1634.88	1	360.164	5977.89	4	368.911	5907.35	4	385.93	5596.68	4	504.019	1606.39	1	337.261	5802.53	4	353.15	5913.07	4	365.097	5726.97	4	507.564	1633.55	1	340.113	5937.85	4	350.93	5750.66	4	358.331	5681.46	4	331.125	5952.6	4	344.495	5398.9
348.801	5324.27	4	353.498	5699.4	4	362.994	6230.65	4	513.924	1789.15	1	360.291	5847.47	4	369.206	5814.63	4	386.232	5640.25	4	504.137	1662.17	1	337.292	5775.37	4	353.308	5851.96	4	365.131	5550.44	4	507.695	1648.19	1	340.718	5911.7	4	350.949	6324.08	4	358.477	5891.4	4	331.144	5591.47	4	344.604	5707.02
348.811	5919.84	4	353.501	5970.85	4	363.14	5597.59	4	513.984	1633.33	1	360.879	5726.63	4	369.222	5699.5	4	386.35	5917.15	4	504.187	1622.69	1	337.329	5812.71	4	353.673	5810.61	4	365.199	6201.49	4	507.823	1803.81	1	340.772	5903.96	4	350.975	6190.75	4	358.502	5768.76	4	331.801	5775.89	4	344.739	5638.7
348.826	6102.33	4	353.522	6059.27	4	363.548	5714.31	4	514.006	1710	1	360.948	5804.52	4	369.28	5663.33	4	386.457	5786.44	4	504.311	1687.55	1	337.463	6093.33	4	353.772	5804.99	4	365.199	5787.18	4	508.059	1660.73	1	340.842	6280.86	4	351.048	6134.48	4	358.596	5830.32	4	331.913	5984.39	4	344.799	5536.76
348.882	5970.63	4	353.754	5758.83	4	363.575	5779.45	4	514.016	1612.72	1	360.965	5885.81	4	369.353	5727.39	4	386.549	5853.87	4	504.387	1734.28	1	337.802	5609.94	4	353.785	5747.32	4	365.428	5974.28	4	508.129	1735.07	1	341.081	5789.58	4	351.068	5677.24	4	358.624	6303.74	4	332.119	5745.5	4	345.174	6037.24
348.963	6195.46	4	353.789	5717.5	4	363.681	5649.08	4	514.159	1756.03	1	360.969	5817.21	4	369.502	5909.04	4	386.613	5635.18	4	504.397	1631.59	1	337.975	5822.04	4	353.965	5867.41	4	365.488	5578.89	4	508.374	1629.4	1	341.132	5948.79	4	351.324	5594.98	4	358.7	5938.74	4	332.269	5664.91	4	345.317	6072.31
349.04	5889.34	4	353.884	5845.22	4	363.837	5841.17	4	514.191	1655.11	1	361.256	6256.42	4	369.775	5950.15	4	386.652	5812.78	4	504.404	1551.94	1	338.337	5929.94	4	353.981	6032.88	4	366.13	6236.29	4	508.5	1584.61	1	341.154	6047.5	4	351.382	5654.47	4	358.881	5913.35	4	332.595	5576.44	4	345.401	5950.55
349.041	5562.3	4	353.958	5986.07	4	363.87	5832.24	4	514.238	1716.41	1	361.301	5738.6	4	369.972	5639.75	4	386.736	5652.82	4	504.475	1662.14	1	338.412	5607.11	4	354.088	6343.92	4	366.145	5955.92	4	508.613	1557.52	1	341.216	5833.64	4	351.6	6033.79	4	358.937	5674.81	4	332.831	5540.36	4	345.603	5443.03
349.115	6063.68	4	354.018	6202.68	4	363.875	5924.35	4	514.347	1509.61	1	361.371	5648.74	4	370.276	6270.8	4	386.787	5791.35	4	504.527	1624.36	1	338.489	5825.79	4	354.135	5857.38	4	366.392	5780.33	4	508.677	1833.02	1	341.518	6120.26	4	351.647	5698.91	4	358.99	5850.77	4	332.851	5913.79	4	345.688	5582.51
349.176	5736.69	4	354.14	5888.59	4	363.955	6360.88	4	514.517	1645.04	1	361.449	5848.52	4	370.794	6173.95	4	387.426	5696.42	4	504.548	1606.62	1	338.507	5868.37	4	354.223	5686.78	4	366.535	5631.52	4	508.768	1728.51	1	341.646	5881.95	4	351.734	5961.61	4	359.002	5844.81	4	332.854	5743.21	4	345.708	5548.96
349.258	5699.49	4	354.617	5812.16	4	364.138	5452.78	4	514.567	1599.48	1	361.587	5804.21	4	370.803	5939.5	4	387.833	6173.41	4	504.691	1750.09	1	338.63	6309.91	4	354.508	5838.7	4	366.552	5759.46	4	508.874	1631.18	1	341.71	5732.02	4	351.752	6139.25	4	359.062	5807.42	4	332.987	5731.44	4	345.718	5998.4
349.44	6020.25	4	354.635	5533.07	4	364.158	5805.59	4	514.724	1536.13	1	361.606	6034.16	4	370.834	5414.07	4	388.157	5683.53	4	504.773	1597.67	1	338.729	5807.23	4	354.607	5836.75	4	366.858	5930.69	4	508.937	1561.17	1	341.989	6205.37	4	351.971	6109.72	4	359.31	6169.44	4	333.061	5809.33	4	345.967	5925.41
349.476	6019.26	4	354.853	5803.02	4	364.283	5869.78	4	514.982	1537.76	1	361.707	5876	4	370.982	6319.51	4	388.2	5918.39	4	504.831	1634.23	1	338.934	5960.33	4	354.992	6151.15	4	366.923	5753.64	4	509.015	1603.04	1	342.004	6032.02	4	352.039	5530.08	4	359.508	5873.03	4	333.158	6122.21	4	346.057	5948.84
349.533	6118.47	4	354.869	6298.47	4	364.432	5735.97	4	515.177	1679.25	1	362.013	5771.85	4	371.013	5823.94	4	388.618	5857.54	4	504.846	1765.44	1	338.986	6312.18	4	354.997	5675.72	4	366.958	5588.66	4	509.117	1600.99	1	342.006	5827.6	4	352.082	5631.55	4	359.736	6457.36	4	333.309	5974.58	4	346.088	5817.24
349.722	5902.07	4	354.938	5804.57	4	364.478	6341.75	4	515.207	1665.12	1	362.048	5942.8	4	371.142	5560.23	4	388.651	5687.13	4	504.872	1702.96	1	339.136	5949.28	4	355.289	5694.74	4	367.013	5559.61	4	509.126	1787.9	1	342.075	5819.91	4	352.249	6261.73	4	359.807	5931.09	4	333.447	5666.43	4	346.163	6239.16
349.73	5680.51	4	355.079	6137.05	4	364.492	5736.76	4	515.293	1531.73	1	362.082	5396.44	4	371.344	6110.73	4	389.197	5632.11	4	505.314	1690.44	1	339.155	5991.21	4	355.337	6109.04	4	367.059	6067.82	4	509.137	1667.14	1	342.107	5921.55	4	352.428	5758.6	4	359.879	6000.58	4	333.456	5528.82	4	346.389	5470.31
350.008	5361.66	4	355.105	6080.47	4	364.553	6244.19	4	515.369	1666.33	1	362.108	5752.55	4	371.385	6028.5	4	389.431	5764.37	4	505.381	1542.28	1	339.165	5812.33	4	355.387	6302.44	4	367.103	6181.46	4	509.16	1608.87	1	342.125	5808.16	4	352.473	6344.93	4	359.91	5672.32	4	333.713	5703.38	4	346.549	5760.04
350.096	5776.73	4	355.15	5740.92	4	364.614	5831.97	4	515.467	1706.28	1	362.144	5841.64	4	371.423	5812.58	4	389.529	5903.26	4	505.414	1780.66	1	339.176	6074.93	4	355.431	5958.18	4	367.199	5780.48	4	509.225	1708.77	1	342.135	5813.04	4	352.699	6004.38	4	359.954	5973.82	4	333.813	5779.77	4	346.635	5730.34
350.333	6014.68	4	355.199	5806.58	4	364.676	6145.57	4	515.522	1701.56	1	362.467	5870.91	4	371.521	5754.7	4	389.586	5803.85	4	505.422	1537.62	1	339.251	5774.43	4	356.061	5853.09	4	367.201	5642.43	4	509.231	1629.93	1	342.28	5650.43	4	352.937	6223.49	4	360.365	5812.38	4	333.985	5828.61	4	346.64	5702.74
350.601	6062.69	4	355.281	5691.39	4	364.802	5526.95	4	515.533	1687.53	1	362.746	6323.52	4	371.555	5951.62	4	390.438	5936.51	4	505.45	1734.09	1	339.257	5756.56	4	356.086	5676.32	4	367.265	5759.23	4	509.376	1747.76	1	342.519	5463.86	4	353.044	5690.91	4	360.96	5965.05	4	334.115	6057.6	4	346.74	5585.47
350.674	5456.08	4	355.55	5637.81	4	364.959	5989.95	4	515.603	1651.76	1	362.921	5935.66	4	371.63	6398.65	4	390.451	5649.61	4	505.528	1614.08	1	339.567	6135.59	4	356.192	5867.35	4	367.297	5734.44	4	509.521	1610.7	1	342.614	6333.33	4	353.317	5839.31	4	361.071	5784.99	4	334.243	5715.61	4	346.749	5945.7
350.738	6012.31	4	355.733	5961.53	4	365.03	6279.05	4	515.651	1614.98	1	363.039	5780.06	4	371.64	5733.23	4	390.809	5700.77	4	505.542	1661.92	1	339.699	5881.38	4	356.206	5637.31	4	367.388	5655.53	4	509.857	1593.24	1	342.849	6077.34	4	353.647	6013.53	4	361.359	5687.12	4	334.364	5839.81	4	346.781	5818.16
350.972	6183.6	4	355.826	5927.99	4	365.039	5569.28	4	515.833	1644.42	1	363.049	5899.82	4	371.8	6129.07	4	390.991	6177.66	4	505.551	1645.93	1	339.935	5931.82	4	356.514	5875.76	4	367.413	5754.42	4	509.967	1692.62	1	342.872	5974.49	4	353.7	6292.14	4	361.376	5711.38	4	334.397	5630.65	4	346.794	6146.89
351.255	5866.42	4	356.024	5855.88	4	365.183	5700.14	4	515.879	1633.79	1	363.29	5764.93	4	371.834	5740.17	4	391.047	5565.92	4	505.637	1703.28	1	339.936	5977.19	4	356.581	5759.74	4	367.421	5856.05	4	510.02	1691.53	1	342.883	5802.35	4	353.868	6358.7	4	361.394	5747.02	4	334.499	5785.61	4	346.833	6137.43
351.394	5893.46	4	356.071	5729.76	4	365.425	5502.85	4	515.899	1623.48	1	363.375	5746.36	4	372.428	5573.23	4	391.12	5812.7	4	505.807	1636.45	1	340.18	6306.39	4	356.664	5828.8	4	367.504	5790.71	4	510.045	1670.24	1	342.976	5955.63	4	353.922	5565.43	4	361.538	5671.24	4	334.507	5657.62	4	347.379	5962.52
351.44	5837.88	4	356.152	6060.49	4	365.491	5832.16	4	515.947	1712.86	1	363.445	5746.46	4	372.489	5461.45	4	391.123	6155	4	505.896	1626.49	1	340.186	5888.42	4	356.74	5867.77	4	367.75	5804.14	4	510.141	1697.45	1	343.122	5983.38	4	353.963	5812.52	4	361.703	6019.81	4	334.574	5726.16	4	347.525	5974.55
351.723	5512.92	4	356.274	5904	4	365.681	5803.9	4	516.013	1563.98	1	363.447	5840.42	4	372.675	5907.8	4	391.181	5746.28	4	505.9	1689.44	1	340.196	6103.71	4	356.766	5715.44	4	367.816	5858.83	4	510.218	1632.28	1	343.19	5833.16	4	353.969	5753.52	4	361.84	5763.77	4	334.729	6016.45	4	347.616	5669.26
351.74	5858.81	4	356.353	6308.2	4	365.752	5889.92	4	516.081	1758.59	1	363.489	5802.62	4	372.712	5782.88	4	391.535	5673.11	4	505.956	1597.08	1	340.293	5954.71	4	357.14	6109.11	4	368.039	5644.28	4	510.405	1595.27	1	343.279	5883.8	4	354.096	5685.68	4	362.02	5700.25	4	334.761	5788.37	4	347.739	5861.07
351.766	5829.36	4	356.459	6124.73	4	365.926	5683.97	4	516.084	1737.46	1	363.559	5727.85	4	372.776	5918.51	4	391.772	5740.81	4	505.987	1546.48	1	340.366	5855.39	4	357.153	5896.94	4	368.143	5429.21	4	510.436	1663.57	1	343.516	5831.76	4	354.121	5812.22	4	362.023	5708.16	4	334.79	5739.64	4	347.937	5592.94
352.031	5696.19	4	356.514	5825.51	4	365.973	5860.54	4	516.099	1683.59	1	363.573	5910.36	4	372.802	5844.33	4	391.797	5724.91	4	505.995	1585.91	1	340.418	6008.37	4	357.39	5734.66	4	368.323	5797.68	4	510.603	1587.32	1	343.678	5714.98	4	354.183	5633.34	4	362.114	5792.09	4	335.007	5978.61	4	347.954	6228.51
352.218	5566.61	4	356.665	5656.53	4	366.051	5623.95	4	516.171	1776.96	1	363.666	5272.11	4	372.868	5564.62	4	392.16	5754.25	4	506.082	1765.9	1	340.428	5893.84	4	357.427	5849.98	4	368.347	5737.93	4	510.813	1601.13	1	343.718	5771.14	4	354.218	5937.53	4	362.204	5685.23	4	335.163	5918.16	4	347.96	6124.88
352.479	5668.42	4	357.011	5994.19	4	366.19	5672.7	4	516.26	1766.62	1	363.746	5540.04	4	372.994	6263.41	4	392.235	5832.79	4	506.17	1746.26	1	340.516	5726.57	4	357.531	6095.41	4	368.369	5706.27	4	510.877	1638.26	1	343.797	5960.89	4	354.305	6188.53	4	362.285	5901.81	4	335.262	5889.91	4	348.371	5489.2
352.48	5630.55	4	357.098	6191.49	4	366.195	6410.95	4	516.301	1757.93	1	363.918	5554.98	4	373.007	5794.46	4	392.409	5638.74	4	506.218	1654.21	1	340.621	5967.81	4	357.554	6199.6	4	368.457	5699.13	4	510.929	1618.71	1	343.935	6389.37	4	354.636	6183.1	4	362.579	5854.73	4	335.272	5988.96	4	348.649	5662.47
352.589	6225.81	4	357.119	5698.4	4	366.213	5825.31	4	516.315	1626.86	1	364.018	5858.55	4	373.148	5767.94	4	392.55	5664.97	4	506.4	1640.99	1	340.663	5682.28	4	357.683	5991.75	4	368.493	5888.94	4	511.012	1691.19	1	344.072	5940.8	4	354.708	6139.01	4	362.617	5800.97	4	335.366	5943.09	4	348.688	5767.67
353.001	5841.11	4	357.236	5788.86	4	366.308	6246.39	4	516.318	1552.84	1	364.033	5689.75	4	373.264	5888.22	4	392.567	5483.96	4	506.629	1562.04	1	340.711	5927.66	4	357.747	5840.68	4	368.533	5578.02	4	511.08	1580.68	1	344.233	5665.58	4	354.77	5863.05	4	362.63	5867.8	4	335.43	5867.74	4	348.695	5877.4
353.15	5777.78	4	357.477	6190.31	4	366.462	5660.34	4	516.374	1839.25	1	364.075	5900.55	4	373.299	5564.36	4	392.59	5772.72	4	506.858	1626.62	1	340.732	5888.51	4	357.853	6195	4	368.749	5750.14	4	511.087	1646.67	1	344.263	5806.73	4	354.78	6257.69	4	362.933	5796.11	4	335.432	5711.57	4	348.798	5904.46
353.156	6051.67	4	357.493	5674.08	4	366.488	5808.35	4	516.406	1598.1	1	364.136	5837.96	4	373.43	5699.63	4	392.81	5585.53	4	506.969	1681.57	1	340.832	5687.94	4	357.897	5883.01	4	368.786	6008.56	4	511.092	1674.29	1	344.508	5775.25	4	354.782	6176.81	4	363.015	6337.84	4	335.554	5844.16	4	348.917	6195.65
353.407	5824.27	4	357.56	5639.07	4	366.567	6255.52	4	516.417	1541.87	1	364.224	5748.5	4	373.439	5924.66	4	392.835	5542.49	4	507.141	1601.02	1	340.871	5876.72	4	357.925	6020.87	4	368.891	5867.72	4	511.109	1688.45	1	344.526	5707.38	4	354.817	5804.63	4	363.204	5619.72	4	335.636	5919.06	4	348.972	5582.78
353.443	5852.55	4	357.77	6658.69	4	366.576	5722.43	4	516.494	1799.08	1	364.332	5778.05	4	373.457	6309.19	4	392.869	5789.69	4	507.158	1688.9	1	341.024	6178.53	4	358.239	5714.4	4	368.905	5729.94	4	511.707	1667.57	1	344.552	5838.8	4	354.927	5673.51	4	363.271	6228.49	4	335.721	6133.79	4	349.017	5758.76
353.527	6073.49	4	357.884	5794.77	4	366.677	5727.3	4	516.577	1690.08	1	364.438	5733.93	4	373.463	5897.56	4	393.023	6067.35	4	507.178	1645.98	1	341.115	5815.97	4	358.321	5983.61	4	368.907	6021.88	4	511.718	1631.57	1	344.63	5913.55	4	355.03	6352.58	4	363.361	6371.38	4	335.761	5930.91	4	349.021	6285.16
353.658	5763.68	4	357.895	6218.22	4	366.928	5760.42	4	516.578	1850.12	1	364.615	5559.95	4	373.563	6075.61	4	393.03	5640.86	4	507.284	1631.28	1	341.161	6222.22	4	358.425	6118.08	4	368.909	5737.49	4	512.164	1651.07	1	344.73	5845.17	4	355.205	5722.51	4	363.378	6343.87	4	335.983	5615.34	4	349.077	5920.86
353.709	5758.06	4	357.914	6127.98	4	366.978	5938.81	4	516.594	1781.39	1	365.002	5809.68	4	373.591	5702.63	4	393.034	6070.54	4	507.346	1618.11	1	341.193	5889.79	4	358.918	5836.72	4	369.219	6164.8	4	512.196	1592.15	1	344.748	5915.73	4	355.236	5987.49	4	363.474	5815.05	4	336.005	5655.41	4	349.177	5459.73
353.919	6004.98	4	357.952	5660.73	4	366.988	5386.32	4	516.719	1743.31	1	365.206	5613.8	4	373.769	5803.22	4	393.057	5788.63	4	507.381	1612.9	1	341.204	5649.32	4	359.073	5422.08	4	369.558	5897.01	4	512.225	1687.7	1	344.78	5782.53	4	355.72	6297.18	4	363.525	5814.21	4	336.011	6007.5	4	349.263	6095.8
353.969	6334.11	4	358.001	5803.4	4	367.073	5894.63	4	516.73	1683.6	1	365.284	5672.41	4	373.964	5947	4	393.137	5637.87	4	507.394	1658.07	1	341.409	5706.93	4	359.262	6191.11	4	369.766	5768.11	4	512.232	1562.64	1	344.822	6069.27	4	355.736	6099.11	4	363.579	5839.7	4	336.063	5955.17	4	349.345	6156.44
354.052	5716.25	4	358.021	6182.57	4	367.272	5553.49	4	516.758	1689.1	1	365.49	6182.27	4	373.983	5827.46	4	393.231	6256.31	4	507.465	1628.92	1	341.526	5938.99	4	359.393	5793.41	4	369.85	5912.24	4	512.456	1827.34	1	345.009	5758.96	4	355.882	5643.67	4	363.688	5975.06	4	336.372	5835.48	4	349.567	5808.59
354.054	5779.57	4	358.108	5570.92	4	367.385	6088.32	4	516.769	1617.94	1	365.568	5713.93	4	373.995	5763.5	4	393.25	5785.88	4	507.786	1671.46	1	341.545	5782.49	4	359.477	5749.76	4	369.901	5618.26	4	512.473	1635.49	1	345.016	6152.28	4	355.957	5753.44	4	363.688	6002.73	4	336.373	5797.99	4	349.568	5864.62
354.142	5649.68	4	358.186	5951.58	4	367.407	5784.25	4	516.884	1679.67	1	365.609	5692.71	4	374.067	5655.19	4	393.26	5774.05	4	507.803	1584.08	1	341.563	6137.16	4	359.513	5770.33	4	370.223	5970.88	4	512.651	1712.6	1	345.041	5935.46	4	356.022	5570.65	4	363.815	5731.59	4	336.433	5690.7	4	349.697	5813.98
354.143	6179.86	4	358.303	5862.63	4	367.443	5741.66	4	516.906	1650.97	1	365.679	5674.45	4	374.078	5814.53	4	393.313	5606.7	4	507.862	1521.24	1	341.706	5827.19	4	359.544	5655.07	4	370.321	5619.53	4	512.677	1657.15	1	345.076	5905.65	4	356.025	5590.27	4	363.852	5727.51	4	336.496	5992.44	4	349.708	6162.31
354.168	5693.08	4	358.334	5748.24	4	367.589	5948.57	4	516.947	1591.94	1	365.684	5941.52	4	374.141	5964.27	4	393.353	5661.87	4	507.952	1652.69	1	341.713	6320.03	4	359.622	5588	4	370.45	5632.29	4	512.719	1585.42	1	345.233	5877.41	4	356.055	5772.39	4	363.88	5830.19	4	336.565	6107.05	4	349.784	6372.2
354.354	5769.89	4	358.541	6007.69	4	367.778	5777.63	4	517.119	1601.09	1	365.807	5670.09	4	374.165	5638.3	4	393.493	5836.28	4	508.102	1626.72	1	341.88	5678.99	4	359.659	5863.03	4	370.457	5768.4	4	512.918	1667.25	1	345.32	6007.61	4	356.112	5759.65	4	364.334	6225.27	4	336.656	6208.97	4	349.799	5756.16
354.368	5552.32	4	358.574	5914.87	4	367.78	5647.2	4	517.189	1757.47	1	366.054	5835.08	4	374.204	5620.15	4	393.58	5600.48	4	508.162	1758.9	1	341.899	5880.16	4	359.672	6260.25	4	370.528	5670.1	4	512.926	1652.15	1	345.383	5845.03	4	356.156	5544.04	4	364.587	5722.23	4	336.71	5711.14	4	349.873	5913.09
354.453	5707.17	4	358.634	5686.43	4	367.897	5758.93	4	517.207	1534.49	1	366.197	5473.42	4	374.396	5736.06	4	393.613	5782.55	4	508.244	1653.9	1	342.122	6070.09	4	359.68	5734.46	4	370.696	5845.63	4	512.95	1571.36	1	345.64	5721.02	4	356.177	6044.15	4	364.655	6065.03	4	336.83	5943.05	4	349.914	6070.22
354.483	6159.44	4	358.87	5783.05	4	368.013	5616.15	4	517.431	1634.27	1	366.505	5689.36	4	374.411	6204.02	4	393.738	6064.84	4	508.255	1637.76	1	342.123	6063.48	4	359.681	5679.75	4	370.739	5798.49	4	513.015	1630.84	1	345.801	6007.03	4	356.204	5800.99	4	364.939	6038.14	4	336.832	5998.72	4	349.991	5760.74
354.484	5544.53	4	358.957	5834.97	4	368.188	5591.44	4	517.474	1741.03	1	366.514	5909.59	4	374.57	5914.36	4	393.926	5694.39	4	508.374	1661.95	1	342.296	6085.83	4	359.797	6492.68	4	370.789	6070.17	4	513.044	1554.05	1	345.818	5819.92	4	356.24	6300.97	4	365.09	5948.95	4	336.894	5715.69	4	350.031	5819.59
354.575	5659.58	4	359.013	5866.84	4	368.197	5924.32	4	517.542	1636.39	1	366.642	5818.42	4	374.572	5747.48	4	393.97	5576.76	4	508.434	1599.93	1	342.51	5727.03	4	359.83	5559.42	4	370.811	5663.91	4	513.157	1647.72	1	345.85	6004.36	4	356.244	5861.64	4	365.122	5747.12	4	337.063	5925.83	4	350.151	6159.64
354.85	5825.99	4	359.188	5652.59	4	368.244	5844.32	4	517.586	1675.97	1	366.866	5759.17	4	374.859	5859.38	4	394.1	5552.94	4	508.673	1638.14	1	342.604	5550.94	4	359.844	5606.95	4	371.119	5872.62	4	513.178	1643.53	1	345.971	5706.41	4	356.307	5668.63	4	365.547	5558.69	4	337.109	5728.66	4	350.158	6103.45
354.994	5766.75	4	359.19	6043.96	4	368.339	5567.48	4	517.638	1678.45	1	367.186	5707.86	4	374.887	5636.11	4	394.166	5930.56	4	508.68	1676.05	1	342.613	6326.2	4	359.919	5632.8	4	371.212	5841.39	4	513.202	1737.4	1	346.029	6142.43	4	356.339	5650.66	4	365.604	5772.01	4	337.118	5699.4	4	350.262	5860.08
355.138	5895.82	4	359.465	6127.74	4	368.5	6022.43	4	517.684	1607.14	1	367.455	5539.44	4	374.9	5839.89	4	394.6	5654.32	4	508.696	1670.53	1	342.707	6134.02	4	359.971	5826.77	4	371.238	5632.22	4	513.23	1615.91	1	346.082	5767.32	4	356.37	5863.25	4	365.66	6176.52	4	337.175	5764.45	4	350.279	5578.74
355.183	5605.75	4	359.599	5716.69	4	368.545	5784.71	4	517.812	1600.8	1	367.466	5746.18	4	374.905	5836.71	4	394.85	6169.13	4	508.771	1589.07	1	342.771	5833.79	4	360.078	5743.64	4	371.402	5636.64	4	513.27	1654.96	1	346.105	5809.36	4	356.496	6253.02	4	365.674	6240.64	4	337.275	5542.99	4	350.296	5426.01
355.216	5826.42	4	359.687	5992.93	4	368.75	6118.31	4	517.828	1720.79	1	367.479	5839.58	4	375.3	5650.13	4	395.318	5819.51	4	508.814	1589.69	1	342.814	5916.95	4	360.123	5734.88	4	371.53	6154.98	4	513.305	1745.46	1	346.132	5891.22	4	356.673	5854.89	4	365.723	6005.22	4	337.299	5844.92	4	350.546	5616.94
355.343	5639.46	4	359.795	5868.43	4	368.773	6172.03	4	517.899	1683.76	1	367.595	5980.81	4	375.304	5664.46	4	395.426	6137.34	4	508.839	1636.16	1	343.116	5719.93	4	360.219	5989.52	4	371.545	5837.84	4	513.346	1714.6	1	346.177	6157.23	4	356.727	6233.29	4	365.73	6088.45	4	337.326	6131.71	4	350.559	6022.48
355.485	5896.47	4	359.832	5883.27	4	368.853	5836.76	4	517.907	1633.69	1	367.742	5822.2	4	375.611	5687.45	4	395.447	6093.86	4	508.844	1617	1	343.152	5756.13	4	360.426	5777.99	4	371.614	5750.15	4	513.447	1731.15	1	346.233	5844.34	4	356.814	5973.05	4	365.898	5760.69	4	337.37	5765.59	4	350.697	5642.48
355.549	5502.98	4	359.85	5784.83	4	368.875	6245.67	4	518.029	1668.27	1	367.869	5812.49	4	375.794	5543.18	4	395.512	5725.82	4	508.907	1571.59	1	343.209	5724.78	4	360.427	5731.55	4	371.619	5776.62	4	513.485	1675.63	1	346.239	5741.6	4	356.865	5681.69	4	365.932	5944.88	4	337.453	5550.49	4	350.747	5585.51
355.56	5803.05	4	359.995	6089.41	4	368.925	6156.35	4	518.048	1685.51	1	368.097	6243.45	4	375.989	6175.68	4	395.682	5885.62	4	508.908	1560.27	1	343.283	5721.17	4	360.479	6028.1	4	371.633	5627.47	4	513.597	1545.55	1	346.332	5741.87	4	356.958	6039.85	4	366.019	5905.96	4	337.522	5864.08	4	350.938	5898.27
355.583	6028.03	4	360.113	6365.42	4	369.104	6041.25	4	518.074	1560.84	1	368.147	5675.94	4	376.063	5833.93	4	395.757	5807.93	4	508.914	1653.3	1	343.442	5740.76	4	360.576	5891.62	4	371.638	5599.89	4	513.614	1651.77	1	346.694	5820.59	4	357.047	6129.42	4	366.122	5750.09	4	337.577	5745.97	4	350.951	5875.35
355.665	5879.16	4	360.142	5731.59	4	369.201	6242.72	4	518.393	1574.03	1	368.909	5959.94	4	376.093	6252.8	4	395.83	5766.29	4	508.963	1755.85	1	343.651	6263.32	4	360.608	5623.48	4	371.747	5661.73	4	513.638	1701.51	1	346.77	5886.91	4	357.082	5672.45	4	366.222	6385.76	4	337.639	5799.95	4	351.022	5863.4
355.686	5779.87	4	360.158	5375.43	4	369.385	5892.37	4	518.403	1659.54	1	368.926	5818.01	4	376.184	6067.06	4	395.884	6045.93	4	509.183	1650.61	1	343.678	5541.86	4	360.699	5450.1	4	371.808	5947.03	4	513.646	1681.29	1	346.779	6204.47	4	357.107	6252.86	4	366.253	5768.42	4	337.661	5755.81	4	351.088	5807.97
355.827	5531.03	4	360.208	5752.98	4	369.677	5959.37	4	518.495	1693.37	1	369.056	6082.73	4	376.214	5565.8	4	396.118	5667.35	4	509.19	1637.72	1	343.726	6030.56	4	360.764	5790.5	4	372.084	5641.17	4	513.662	1587.83	1	346.794	6173.67	4	357.117	6122.03	4	366.27	5695.6	4	337.711	5842.04	4	351.141	5830.7
355.86	5682.93	4	360.21	6159.88	4	369.719	6015.24	4	518.51	1666.93	1	369.173	5786.01	4	376.386	5717.53	4	396.272	5868.79	4	509.265	1682.73	1	343.784	5797.63	4	360.848	5885.81	4	372.108	5467.4	4	513.74	1606.73	1	346.837	5744.07	4	357.185	5505.22	4	366.279	6027.53	4	337.787	5743.96	4	351.388	6062.86
356.018	5718.48	4	360.316	5914.48	4	369.729	5613.08	4	518.513	1694.01	1	369.201	5701.01	4	376.83	5756.67	4	396.38	5818.75	4	509.304	1633.09	1	343.795	6205.69	4	360.863	5913.91	4	372.201	5859.13	4	513.775	1732.46	1	346.854	5778.39	4	357.244	6260.09	4	366.382	6084.92	4	337.856	5792.86	4	351.409	5521.28
356.207	6033.94	4	360.606	6285.65	4	369.825	5780.51	4	518.551	1716.95	1	369.245	5715.93	4	377.045	5566.46	4	396.438	5439.14	4	509.313	1640.34	1	343.878	6254.24	4	360.945	5693.57	4	372.236	5738.72	4	513.97	1713.77	1	346.892	5726.76	4	357.264	5704.68	4	366.384	5552.72	4	337.864	5773.01	4	351.41	6229.31
356.394	5681.94	4	360.93	6064.77	4	370.06	6342.65	4	518.592	1577.34	1	369.414	5670.44	4	377.236	5973.01	4	396.637	5820.06	4	509.362	1633.15	1	343.899	6189.17	4	361.072	6303.5	4	372.246	5735.87	4	513.99	1683.94	1	346.896	5618.46	4	357.344	5721.34	4	366.39	5836.55	4	337.928	5835.58	4	351.564	5646.52
356.505	5758.24	4	360.96	5505.91	4	370.074	5683.92	4	518.887	1624.62	1	369.426	5717.32	4	377.331	6207.36	4	396.791	5661.99	4	509.365	1635.16	1	343.944	6130.2	4	361.085	5635.51	4	372.266	5655.9	4	514.005	1706.75	1	346.941	6329.44	4	357.368	5945.28	4	366.402	5770.23	4	338.191	6408.02	4	351.72	5773.95
356.587	5900.27	4	361.241	5874.59	4	370.093	5844.74	4	518.918	1705.28	1	369.47	5814.86	4	377.353	6278.53	4	397.013	5570.57	4	509.62	1552.65	1	344.063	6221.05	4	361.134	5885.56	4	372.405	5866.15	4	514.032	1649.95	1	346.977	5879.91	4	357.372	5887.59	4	366.44	6143.22	4	338.24	5977.6	4	351.785	6063.33
356.693	6135.3	4	361.356	6075.92	4	370.128	5781.85	4	518.941	1573.44	1	369.487	6232.61	4	377.476	5586.15	4	397.116	5622.32	4	509.637	1619.55	1	344.512	5891.25	4	361.137	5931.07	4	372.477	5874.53	4	514.108	1563.07	1	347.111	5727.96	4	357.429	5876.58	4	366.791	5855.75	4	338.383	5830.68	4	351.871	6203.41
356.708	5691.75	4	361.358	5503.85	4	370.195	5711.9	4	519.027	1724.49	1	369.497	6071.21	4	377.484	5756.06	4	397.189	6036.69	4	509.743	1624.92	1	344.534	5870.38	4	361.164	5851.65	4	372.484	5840.6	4	514.111	1476.9	1	347.133	6326.52	4	357.462	5632.9	4	366.799	5833.98	4	338.404	5724.17	4	351.896	5569.37
356.797	5874.9	4	361.495	5835.18	4	370.207	5763.35	4	519.069	1648.93	1	370.056	5804.02	4	377.522	5828.6	4	397.204	6150.94	4	509.756	1782.91	1	344.579	5718.88	4	361.217	6027.7	4	372.55	5950.47	4	514.128	1786.37	1	347.142	5980.3	4	357.655	5682.01	4	366.912	5777.51	4	338.415	5916.1	4	352.005	5680.38
356.834	6175.55	4	361.621	5663.27	4	370.299	5538.83	4	519.132	1641.68	1	370.123	5638.18	4	377.597	6206.88	4	397.324	5674.72	4	509.82	1632.17	1	344.612	6180.24	4	361.262	6094.58	4	372.717	6237.37	4	514.131	1708.4	1	347.221	5874.89	4	357.673	5778.36	4	366.93	5775.58	4	338.499	5682.49	4	352.073	5944.77
356.862	5807.81	4	361.687	5581.05	4	370.407	5777.63	4	519.133	1676.55	1	370.546	5754.18	4	377.721	5999.79	4	397.443	6018.51	4	510.028	1599.94	1	344.88	6067.12	4	361.263	5931.52	4	372.743	5914.03	4	514.137	1658.1	1	347.347	6050.66	4	357.738	5909.31	4	366.936	6283.43	4	338.601	5657.62	4	352.093	5571.39
356.931	5823.08	4	361.723	5943.55	4	370.544	6209.69	4	519.139	1651.77	1	370.625	5695.49	4	377.88	6121.73	4	397.502	6250.85	4	510.043	1614.4	1	345.02	5517.39	4	361.394	5865.91	4	372.798	6132.11	4	514.278	1631.35	1	347.407	5834.4	4	357.972	5891.22	4	367.016	5764.68	4	338.61	5784.09	4	352.451	5852.97
356.938	6073.62	4	361.834	5763.52	4	370.565	5904.68	4	519.173	1665.65	1	370.648	5937.57	4	378.092	5778.08	4	397.592	5638.36	4	510.084	1711.75	1	345.069	6160.58	4	361.427	6090.4	4	372.962	6131.1	4	514.286	1655.66	1	347.55	5929.06	4	357.986	5698.57	4	367.129	5733.2	4	338.748	5771.51	4	352.545	5963.4
357.257	5335.65	4	361.931	5946.88	4	370.568	5732.26	4	519.27	1597.32	1	370.652	5752.27	4	378.309	5759.11	4	397.657	5631.02	4	510.101	1638.27	1	345.133	6009.26	4	361.447	5749.09	4	372.971	5778.43	4	514.385	1681.63	1	347.56	5764.59	4	358.196	5549.66	4	367.42	5523.99	4	338.769	6071.18	4	352.735	5788.98
357.323	5582.72	4	361.931	5631.35	4	370.585	5977.74	4	519.322	1791.16	1	370.711	5862.34	4	378.528	5694.57	4	397.676	5724.52	4	510.174	1687.63	1	345.173	5967.34	4	361.465	5709.55	4	373.017	5647.53	4	514.391	1619.29	1	347.698	5964.09	4	358.236	6276.76	4	367.431	6008.52	4	339.021	5709.01	4	352.737	6045.42
357.4	6284.23	4	362.023	5834.37	4	370.634	6222.01	4	519.467	1655.42	1	370.884	5664.36	4	378.634	5911.34	4	397.8	5870.15	4	510.183	1720.65	1	345.407	6420.74	4	361.522	5691.48	4	373.203	5800.43	4	514.421	1665.26	1	347.798	5826.64	4	358.25	6307.76	4	367.448	5640.1	4	339.192	6140.38	4	352.789	5590.61
357.632	5383.1	4	362.215	5757.59	4	370.757	5531.11	4	519.497	1697.02	1	371.03	5795.31	4	378.644	5682.28	4	397.83	5521.44	4	510.194	1605.86	1	345.453	5714.53	4	361.531	6185.54	4	373.225	5778.15	4	514.457	1552.23	1	347.854	5695.94	4	358.279	5762.26	4	367.531	5740.49	4	339.375	5761.61	4	352.82	5878.54
357.955	5784.47	4	362.372	5653.66	4	370.758	6316.82	4	519.514	1664.92	1	371.341	5469.01	4	378.656	6230.21	4	398.007	5673.13	4	510.208	1605.25	1	345.464	5928.84	4	361.715	6288.09	4	373.225	6057.98	4	514.502	1562.82	1	347.897	5912.13	4	358.335	6218.52	4	367.573	5607.14	4	339.384	5881.38	4	353.043	5640.86
358.129	5656.74	4	362.375	6115.1	4	370.821	6502.4	4	519.534	1694.28	1	371.645	5573.34	4	378.67	6118.94	4	398.171	6144.97	4	510.234	1627	1	345.489	5880.02	4	361.834	5757.9	4	373.243	5728.55	4	514.546	1665.84	1	347.94	5868.41	4	358.37	5949.45	4	367.599	6353.16	4	339.429	5545.59	4	353.048	6147.76
358.306	5460.57	4	362.376	6279.29	4	370.957	5626.77	4	519.581	1691	1	371.738	5784.62	4	378.78	5837.8	4	398.28	5941.93	4	510.257	1550.5	1	345.517	5792.14	4	361.958	6257.95	4	373.369	5767.35	4	514.561	1557	1	347.967	6281.62	4	358.406	5607.88	4	367.736	6012	4	339.431	5760.56	4	353.107	6132.21
358.436	5802.64	4	362.601	5960.25	4	371.024	5903.52	4	519.635	1623.69	1	371.9	5905	4	379.24	5846.05	4	398.483	5617.97	4	510.271	1553.87	1	345.523	6115.79	4	362.031	5600.05	4	373.475	5690.66	4	514.571	1576.64	1	348.021	5626.98	4	358.463	5929.11	4	367.93	5748.14	4	339.696	5762.59	4	353.197	5443.58
358.561	6090.45	4	362.644	5709.54	4	371.075	5828.93	4	519.654	1659.73	1	371.924	6182.74	4	379.256	5740.45	4	398.514	5865.51	4	510.276	1560.5	1	345.535	6235.15	4	362.382	6130.2	4	373.498	5665.33	4	514.603	1667.3	1	348.043	5702.29	4	358.472	5807.39	4	367.984	5962.49	4	339.761	6120.54	4	353.217	5914.67
358.627	5919.69	4	362.652	5583.42	4	371.261	5631.48	4	519.657	1663.7	1	372.141	5615.33	4	379.565	5677.92	4	398.601	5945.75	4	510.425	1557.4	1	345.558	6055.14	4	362.456	5742.05	4	373.524	6049.81	4	514.676	1713.07	1	348.267	6041.18	4	358.548	5653.97	4	368.182	5967.16	4	339.871	5707.77	4	353.297	6306.57
358.729	5877.86	4	362.656	5686.54	4	371.262	5939.87	4	519.794	1565.87	1	372.275	5931.35	4	379.73	5535.17	4	398.638	5658.95	4	510.459	1679.98	1	345.637	5987.52	4	362.582	5791.5	4	373.804	5517.86	4	514.677	1728	1	348.269	5855.66	4	358.633	5700.86	4	368.256	5816.69	4	339.923	5728.44	4	353.323	6148.22
358.738	5755	4	362.895	5722.47	4	371.329	5793.4	4	519.951	1699.26	1	372.31	5920.83	4	379.941	5729.81	4	398.671	5836.53	4	510.618	1738.23	1	345.727	6139.09	4	362.67	5919	4	373.94	6243.33	4	514.72	1581.7	1	348.531	6004.54	4	358.652	5629.36	4	368.321	6047.71	4	339.961	5631.53	4	353.376	5669.92
358.938	5885.63	4	363.222	5876.47	4	371.404	5934.67	4	519.984	1607.72	1	372.354	6077.08	4	380.069	5621.92	4	398.733	5626.39	4	510.641	1649	1	345.804	5690.19	4	362.914	5805.85	4	373.973	5634.37	4	514.772	1663.23	1	348.567	5826.55	4	358.705	5937.88	4	368.335	5631.97	4	339.99	5760.41	4	353.447	5708.08
358.949	6046.04	4	363.308	5631.75	4	371.459	6094.51	4	520.07	1689.47	1	372.612	5940.8	4	380.149	5781.6	4	398.761	5894.97	4	510.646	1623.08	1	346.015	5735.15	4	362.916	5953.36	4	374.101	5946.78	4	514.792	1653.62	1	348.628	5760.46	4	358.751	5684.59	4	368.361	5675.83	4	340.142	6032.72	4	353.452	6072.67
358.981	5718.05	4	363.353	5845.8	4	371.565	5707.86	4	520.149	1668.77	1	372.622	5867.16	4	380.175	5735.03	4	398.861	5531.56	4	510.674	1617.77	1	346.052	5609.01	4	362.973	6132.12	4	374.303	5894.59	4	514.801	1634	1	348.712	6079.74	4	358.758	5769.88	4	368.37	5640.07	4	340.15	5992.05	4	353.475	5834.61
359.056	5961.3	4	363.385	5869.53	4	371.579	6254.54	4	520.18	1606.11	1	372.674	5738.74	4	380.249	5402.5	4	398.967	5664.03	4	510.691	1697.65	1	346.057	6000.78	4	363.04	6115.85	4	374.344	6202.49	4	514.806	1662.21	1	348.776	6037.19	4	358.835	5644.51	4	368.564	6386.71	4	340.198	5641.9	4	353.612	6134.32
359.182	5873.98	4	363.53	5837.86	4	371.604	5901.82	4	520.185	1652.36	1	372.678	5771.5	4	380.254	6238.3	4	399.022	5966.96	4	510.801	1757.18	1	346.06	5640.3	4	363.385	5889.71	4	374.359	5647.58	4	514.823	1601.34	1	348.847	6045.99	4	358.886	5817.51	4	368.657	5979.75	4	340.262	5676.27	4	353.634	5979.19
359.24	5878.65	4	363.541	5508.94	4	371.759	5782.73	4	520.195	1677.25	1	373.02	5697.28	4	380.286	5600.65	4	399.051	5858.8	4	510.804	1642.51	1	346.115	6169.64	4	363.537	5702.39	4	374.411	5945.87	4	514.874	1670.9	1	348.882	5870.38	4	358.983	6139.29	4	368.711	6093.41	4	340.278	5700.05	4	353.68	5905.28
359.321	5568.04	4	363.571	5627.45	4	371.791	5700.89	4	520.198	1644.5	1	373.285	5875.48	4	380.331	5774.89	4	399.209	5770.85	4	510.825	1610.15	1	346.16	5799.23	4	363.79	5619.23	4	374.513	5699.76	4	514.956	1731.16	1	348.976	5959.37	4	359.307	5953.71	4	368.756	5622.39	4	340.349	5711.13	4	353.844	5618.26
359.446	6083.47	4	363.58	6057.4	4	371.83	5700.34	4	520.303	1559.66	1	373.406	5824.05	4	380.593	5620.53	4	399.337	5659.35	4	510.924	1782.04	1	346.175	5699.58	4	363.818	5777.88	4	374.526	5600.66	4	515.289	1620	1	349.016	6030.39	4	359.381	6167.69	4	368.781	5753.71	4	340.397	5896.66	4	353.848	5920.35
359.557	5766.38	4	363.719	5822.66	4	371.964	5872.16	4	520.309	1695.84	1	373.625	6153.14	4	380.717	5702.98	4	399.403	5699.7	4	511.004	1624.41	1	346.218	5827.85	4	363.882	5754.87	4	374.552	5814.65	4	515.339	1643.46	1	349.152	5771.71	4	359.393	6145.22	4	368.832	5566.87	4	340.41	5730.76	4	353.943	5725.45
359.6	5536	4	363.721	5871.57	4	371.983	5717.53	4	520.547	1581.03	1	373.652	5974.44	4	380.979	5828.36	4	399.545	5657.74	4	511.025	1587.24	1	346.506	5695.82	4	364.282	6036.38	4	374.575	5971.83	4	515.366	1620.69	1	349.154	5905.97	4	359.53	5676.65	4	368.883	5704.04	4	340.451	5661.6	4	354.158	5852.18
359.616	6245.05	4	363.737	5729.64	4	372.052	5562.43	4	520.668	1694.25	1	373.765	6037.39	4	381.133	5874.22	4	399.619	5595.81	4	511.064	1615.52	1	346.543	5888.98	4	364.534	5775.79	4	374.612	5853.91	4	515.665	1559.84	1	349.284	5753.07	4	359.531	5695.39	4	368.958	5799.74	4	340.659	5573.13	4	354.16	5947.57
359.638	5553.48	4	363.83	5726.32	4	372.066	5774.88	4	520.681	1714.64	1	373.79	5749.98	4	381.251	6079.68	4	399.698	5805.21	4	511.297	1548.64	1	346.57	5730.25	4	364.583	5908.61	4	374.643	5819.44	4	515.675	1621.14	1	349.317	6363.8	4	359.543	5700.69	4	369.067	5929.75	4	340.661	5597.68	4	354.332	5871.52
359.672	5605.6	4	363.973	5842.79	4	372.104	5793.97	4	520.855	1676.6	1	373.817	5958.23	4	381.343	5649.51	4	399.733	5743.47	4	511.329	1626.4	1	346.771	6102.48	4	364.831	6196.72	4	374.651	5819.48	4	515.676	1644.41	1	349.338	5706.19	4	359.745	6184.46	4	369.116	6289.39	4	340.733	5834.68	4	354.34	5725.61
359.719	5791.14	4	364.061	5898.38	4	372.113	6096.85	4	520.865	1636.99	1	374.066	5805.65	4	381.441	5808.56	4	399.762	5549.02	4	511.374	1639.66	1	346.781	6005.79	4	364.952	6224.11	4	374.779	5795.78	4	515.73	1551.04	1	349.482	5686.7	4	359.751	5701.3	4	369.291	6197.58	4	341.171	5720.84	4	354.408	5833.33
359.728	5768.36	4	364.114	5580.68	4	372.138	5725.18	4	520.887	1631.41	1	374.097	6173.81	4	381.537	5745.06	4	399.896	5609.17	4	511.449	1747.88	1	346.799	6093	4	365.015	5699.49	4	374.954	5955.58	4	515.73	1639.34	1	349.496	5794.03	4	359.773	5448.24	4	369.414	5886.66	4	341.256	5774.4	4	354.411	5720.85
359.799	5757.34	4	364.128	5609.34	4	372.228	5869.83	4	520.903	1699.7	1	374.115	5761.83	4	381.562	5761.14	4	399.998	5583.06	4	511.471	1481.37	1	346.851	5711.4	4	365.247	5894.54	4	375.037	5695.24	4	515.75	1673.1	1	349.514	6011.24	4	359.841	6181.17	4	369.524	6277.12	4	341.371	5855.48	4	354.412	5423.07
360.154	5980.89	4	364.216	5612.23	4	372.323	6220.28	4	520.904	1648.7	1	374.147	5957.93	4	381.707	5756.92	4	400.183	5767.1	4	511.554	1592.54	1	346.93	5652.32	4	365.493	5768.9	4	375.047	5812.78	4	515.779	1579.42	1	349.573	5956.38	4	359.923	5773.11	4	369.537	5976.52	4	341.54	5938.96	4	354.439	5735.68
360.222	6131.32	4	364.226	5867.02	4	372.416	5991.06	4	520.911	1684.84	1	374.26	6083.06	4	381.725	5684.38	4	400.694	5688.13	4	511.588	1608.29	1	347.022	6420.9	4	365.497	5906.69	4	375.063	5839.99	4	515.865	1604.61	1	349.656	6027.73	4	359.934	5886.88	4	369.628	6004.71	4	341.546	5956.1	4	354.591	5624.95
360.306	5772	4	364.269	6117.71	4	372.448	6182.72	4	520.989	1602.5	1	374.292	6203.57	4	381.798	5943.51	4	400.954	5747.13	4	511.757	1660.28	1	347.067	5906.15	4	365.503	5834	4	375.117	6190.66	4	515.903	1718.57	1	349.667	5857.38	4	360.062	6345.43	4	369.691	5791.53	4	341.708	5668.63	4	354.591	5717.17
360.374	5967.12	4	364.372	6022.35	4	372.458	6186.59	4	521.025	1731.6	1	374.361	5619.12	4	382.06	5566.13	4	400.982	5352.4	4	511.773	1576.16	1	347.076	5659.3	4	365.604	6197.87	4	375.124	5719.19	4	515.923	1631.54	1	349.669	6082.53	4	360.066	5558.66	4	369.746	6196.27	4	341.849	5578.04	4	354.78	5784.56
360.386	5772.19	4	364.457	5792.95	4	372.485	5779.53	4	521.073	1740.58	1	375.067	5726.01	4	382.276	5582.56	4	401.014	5779.32	4	511.814	1621.99	1	347.16	5976.94	4	365.668	6030.4	4	375.485	5729.03	4	515.996	1740.15	1	349.726	5692.84	4	360.16	5735.39	4	369.746	5649.97	4	341.856	6067.29	4	354.908	5754.27
360.453	5606.25	4	364.561	6235.87	4	372.55	5903.18	4	521.285	1747.62	1	375.204	5859.42	4	382.369	5534.85	4	401.02	5633.44	4	511.831	1602.67	1	347.282	5538.75	4	365.834	6061.17	4	375.584	5720.18	4	516.058	1681.09	1	349.86	5963.78	4	360.239	6065.8	4	369.784	5686.07	4	341.86	5732.47	4	354.931	5851.3
360.63	5926.24	4	364.608	6103.19	4	372.559	5733.92	4	521.354	1665.81	1	375.276	5724.99	4	382.458	6023.39	4	401.102	5932.2	4	511.866	1562.52	1	347.329	5624.64	4	365.935	6235.08	4	375.591	5794.99	4	516.061	1703.14	1	349.885	5799.3	4	360.28	6176.44	4	370.045	5714.38	4	341.895	5757.57	4	355.037	5404.98
360.637	5285.89	4	364.672	6111.57	4	372.71	5940.38	4	521.392	1776	1	375.442	5972.89	4	382.536	5707.7	4	401.28	5714.68	4	511.9	1720.82	1	347.385	6317.13	4	366.014	5904.86	4	375.618	5789.74	4	516.106	1700.61	1	350.09	5794.7	4	360.292	5857.38	4	370.061	5747.21	4	341.907	5802.01	4	355.067	5659.58
360.681	5513.36	4	364.736	5726.35	4	372.754	5909.18	4	521.432	1754.12	1	375.479	5858.68	4	382.566	5695.92	4	401.29	6187.76	4	511.939	1629.3	1	347.437	5815.15	4	366.05	5560.86	4	375.68	5828.21	4	516.126	1596.21	1	350.271	5640.17	4	360.417	5661.82	4	370.156	5894.78	4	342.017	5749.69	4	355.122	5844.49
360.898	6086.41	4	364.755	5927.14	4	372.773	5744.47	4	521.524	1554.66	1	375.49	5987.24	4	382.586	5685.24	4	401.385	5842.7	4	511.967	1533.72	1	347.625	6211.31	4	366.327	5696.33	4	375.696	6189.31	4	516.389	1684.37	1	350.292	5744.48	4	360.637	6470.33	4	370.264	6209.95	4	342.081	5761.94	4	355.345	5826.88
361.022	5590.29	4	364.77	5866.75	4	372.783	5812.32	4	521.575	1582.92	1	375.649	5959.11	4	382.595	5711.9	4	401.777	5742.69	4	511.993	1732.15	1	347.718	6162.46	4	366.347	5894.31	4	375.748	5667.68	4	516.408	1755.8	1	350.315	6216.15	4	360.658	5458.42	4	370.391	5653.07	4	342.087	5643.55	4	355.363	5773.27
361.063	5719.18	4	364.781	5767.53	4	372.851	6145.84	4	521.587	1598.62	1	375.841	5740.01	4	382.644	6081.66	4	401.848	6233.63	4	512.053	1663.76	1	347.845	5674.97	4	366.372	6201.42	4	375.753	5708.92	4	516.41	1756.8	1	350.346	5723.3	4	360.679	5738.58	4	370.454	5685.32	4	342.184	5922.82	4	355.497	6336.31
361.199	6273.95	4	364.869	5827.91	4	372.873	5630.65	4	521.621	1593.06	1	375.892	6266.85	4	382.673	5595.13	4	401.859	5601.94	4	512.115	1629.82	1	347.87	5991.85	4	366.414	5905.74	4	375.763	5576.4	4	516.431	1561.8	1	350.359	5792.74	4	360.905	5999.83	4	370.513	5995.32	4	342.38	5713.07	4	355.587	5819.89
361.538	5771.87	4	364.89	6084.97	4	372.943	5794.31	4	521.634	1792.85	1	375.905	6011.02	4	382.762	5811.42	4	401.869	5615.27	4	512.146	1625.52	1	348.044	6001.97	4	366.435	6326.84	4	375.812	5709.24	4	516.439	1662.99	1	350.454	5867.83	4	360.915	5498.96	4	370.522	5800.33	4	342.394	6004.09	4	355.615	5620.49
361.798	5620.3	4	365.039	6228.58	4	373.143	6207.02	4	521.688	1620.68	1	376.033	5765.03	4	382.764	5712.38	4	401.986	5816.62	4	512.412	1676.12	1	348.186	5902.29	4	366.445	6375.98	4	375.855	6023.03	4	516.507	1740.4	1	350.498	6021.91	4	361.017	6121.7	4	370.885	5596.84	4	342.4	5759.96	4	355.792	5697.62
362.006	5763.84	4	365.061	5755.59	4	373.241	5528.42	4	521.754	1687.38	1	376.2	5593.4	4	382.805	5566.44	4	401.996	5585.05	4	512.445	1599.27	1	348.186	5842.49	4	366.492	6117.82	4	376.063	5808.78	4	516.516	1674.68	1	350.627	5804.19	4	361.086	5459.97	4	370.891	5665.82	4	342.425	5740.85	4	355.798	6133.4
362.014	5974.88	4	365.089	5932.17	4	373.252	5725.5	4	521.754	1636.5	1	376.262	5742.84	4	382.881	6297.21	4	402.194	5936.59	4	512.463	1715.72	1	348.205	6122.72	4	366.58	5864.77	4	376.084	5919.2	4	516.521	1545.16	1	350.651	5720.02	4	361.138	5738.84	4	371.058	5917.79	4	342.436	5790.93	4	355.861	5612.49
362.049	5645.05	4	365.158	5796.35	4	373.293	6187.41	4	521.961	1593.26	1	376.325	5830.08	4	382.91	5789.31	4	402.455	5705.45	4	512.471	1680.83	1	348.223	6165.89	4	366.99	6329.89	4	376.095	5918.37	4	516.73	1549.16	1	350.66	5781.21	4	361.184	5908.75	4	371.107	5784.89	4	342.481	5761.39	4	355.987	5701.52
362.068	6095.42	4	365.16	5710.87	4	373.553	6323.36	4	521.968	1724.47	1	376.331	6055.94	4	383.044	5846.06	4	402.463	5792.04	4	512.493	1686.12	1	348.288	5913.46	4	367.084	5714.06	4	376.105	5895.48	4	516.858	1737.06	1	350.765	5788.07	4	361.184	5620.7	4	371.135	5780.31	4	342.501	5856.74	4	356.04	6172.65
362.079	6145.31	4	365.196	6151.54	4	373.558	5685.24	4	521.994	1622.36	1	376.526	5718.17	4	383.07	5840.85	4	402.487	5630.7	4	512.499	1625.22	1	348.302	5887.51	4	367.296	5742.61	4	376.315	6173.81	4	516.917	1655.23	1	350.913	5815.43	4	361.27	5607.85	4	371.144	5697.94	4	342.599	5663.78	4	356.103	6082.76
362.097	5626.16	4	365.237	5918.01	4	373.635	5800.97	4	521.995	1571.9	1	376.971	5795.12	4	383.115	5756.44	4	402.489	5703.14	4	512.529	1560.44	1	348.339	6400.13	4	367.381	6271.32	4	376.378	5707.31	4	516.934	1699.62	1	350.953	5823.13	4	361.286	5967.34	4	371.16	5404.85	4	342.613	5933.44	4	356.108	5674.73
362.174	5711.99	4	365.283	5622.93	4	373.761	5905.67	4	522.023	1670.98	1	377.011	6006.7	4	383.228	5786.34	4	402.723	5550.11	4	512.534	1662.23	1	348.495	6117.34	4	367.421	5587.16	4	376.379	5834.09	4	517.013	1721.02	1	350.963	5741.97	4	361.297	6030.59	4	371.348	5907.44	4	342.668	5988.29	4	356.223	6017.55
362.229	6027.6	4	365.329	5885.8	4	373.806	5693.06	4	522.085	1676.98	1	377.129	5868.73	4	383.292	5914.43	4	402.731	5887.91	4	512.549	1572.05	1	348.543	5729.04	4	367.534	6178.95	4	376.38	5653.99	4	517.179	1700.35	1	351.013	5735.74	4	361.307	5996.12	4	371.359	5985.35	4	342.844	5591.76	4	356.486	6277.75
362.253	5529.02	4	365.369	5939.15	4	373.823	6007.51	4	522.19	1792.81	1	377.173	6126.42	4	383.417	5874.36	4	402.751	6019.85	4	512.613	1593.82	1	348.609	5873.87	4	367.547	6059.28	4	376.449	5831.54	4	517.34	1710.57	1	351.079	6017.02	4	361.32	5625.11	4	371.441	5628.45	4	342.847	5852.58	4	356.494	5953.41
362.303	5632.64	4	365.422	5893.94	4	373.84	5727.2	4	522.261	1640.46	1	377.208	5675.65	4	383.707	5734.49	4	402.796	5745.39	4	512.644	1741.2	1	348.617	5995.13	4	367.649	5961.73	4	376.501	5735.32	4	517.417	1618.53	1	351.097	5893.34	4	361.494	5920.1	4	371.487	5684.73	4	343.252	5719.57	4	356.543	5845.06
362.401	5988.6	4	365.445	5628.65	4	373.973	6019.39	4	522.346	1619.71	1	377.233	5885.45	4	383.755	5714.99	4	402.816	5654.22	4	512.705	1742.51	1	348.761	5909.19	4	367.742	5770.77	4	376.559	5932.39	4	517.42	1695.13	1	351.123	6360.66	4	361.574	6099.7	4	371.575	6010.45	4	343.274	5697.77	4	356.615	5838.67
362.478	5588.72	4	365.457	6303.6	4	374.079	5744.54	4	522.397	1729.87	1	377.348	5841.9	4	383.822	5518.12	4	402.834	5930.1	4	512.807	1662	1	348.929	6035.11	4	367.743	6151.41	4	376.832	5650.91	4	517.452	1704.23	1	351.373	5699.57	4	361.802	5555.82	4	371.695	5738.16	4	343.278	6167.45	4	356.678	5966.98
362.678	6337.76	4	365.469	5779.06	4	374.289	5406.71	4	522.53	1707.93	1	377.471	5870.78	4	384.051	5961.8	4	402.842	5483.64	4	512.808	1585.19	1	349.02	5893.21	4	367.785	5738.43	4	376.866	5516.99	4	517.508	1591.52	1	351.465	5954.26	4	361.859	5801.91	4	371.701	5960.51	4	343.296	5812.73	4	356.743	5897.08
362.89	5647.78	4	365.574	5549.57	4	374.363	5717.54	4	522.533	1756.79	1	377.742	5815.57	4	384.166	6164.42	4	402.964	6119.81	4	512.924	1609.52	1	349.11	5903.78	4	367.808	5710.69	4	377.107	5616.66	4	517.603	1539.53	1	351.467	5654.49	4	362.003	5439.97	4	371.85	5697.67	4	343.348	5653.4	4	356.761	5938.59
362.968	5574.93	4	365.577	6064.91	4	374.403	6001.94	4	522.616	1784.77	1	377.825	5852.48	4	384.174	6112.49	4	403.116	5912.26	4	512.988	1742.85	1	349.13	5651.98	4	367.926	5908.23	4	377.27	5546.57	4	517.65	1557.17	1	351.551	5644.44	4	362.191	5885.02	4	371.856	5838.96	4	343.567	5806.92	4	356.917	5956.37
363.001	5528.28	4	365.68	5659.22	4	374.407	5725.85	4	522.637	1717.36	1	377.844	5659.9	4	384.306	5805.77	4	403.155	6229.5	4	513.033	1652.65	1	349.169	6321.68	4	367.98	5956.78	4	377.282	5673.53	4	517.677	1587.15	1	351.661	6277.11	4	362.473	5968.34	4	371.921	5645.83	4	343.638	5839.72	4	357.176	5833.1
363.011	5562.68	4	365.721	5550.02	4	374.553	5670.49	4	522.663	1569.57	1	377.847	6232.07	4	384.403	5882.43	4	403.264	5696.15	4	513.071	1618.08	1	349.305	6198.62	4	367.987	5939.22	4	377.359	5882.66	4	517.719	1619.79	1	351.76	5794.76	4	362.5	5733.42	4	371.929	5884.58	4	343.823	5827.35	4	357.353	5767.93
363.021	6126.18	4	365.839	5832.39	4	374.854	6001.9	4	522.725	1659.97	1	377.914	5939.66	4	384.457	6074.3	4	403.295	5724.77	4	513.134	1638.77	1	349.317	5718.29	4	368.024	6104.09	4	377.426	5756.52	4	517.724	1681.63	1	351.785	5785.85	4	362.572	5846.1	4	372.039	5757.56	4	343.878	5629.61	4	357.355	5748.46
363.067	5734.26	4	365.87	6157.07	4	374.921	5669.54	4	522.778	1623.22	1	377.964	5645.9	4	384.457	5603.76	4	403.304	6119.91	4	513.433	1787.28	1	349.322	5709.18	4	368.34	5639.55	4	377.565	5799.69	4	517.745	1728.37	1	351.834	5794.63	4	362.594	5827.17	4	372.086	6089.34	4	343.95	5808.43	4	357.372	5768.58
363.072	6068.67	4	366.082	5978.25	4	374.939	5673.52	4	522.818	1603.07	1	378.024	5461.36	4	384.628	5869.25	4	403.346	5597.71	4	513.47	1601.33	1	349.38	5939.52	4	368.364	5763.58	4	377.633	5777.5	4	517.758	1689.52	1	351.942	5884.65	4	362.651	6078.64	4	372.21	6155.59	4	343.952	5551.59	4	357.403	5534.58
363.085	5778.25	4	366.19	5779.07	4	375.015	5640.68	4	522.868	1622.3	1	378.057	5834.44	4	384.82	6268.7	4	403.536	5854.15	4	513.497	1632.1	1	349.534	5661.84	4	368.476	5910.72	4	377.644	5758.92	4	517.77	1622.84	1	351.953	5835.97	4	362.721	5902.34	4	372.242	5603.84	4	343.969	5746.98	4	357.438	5577.32
363.091	6168.72	4	366.221	5891.03	4	375.022	5933.98	4	522.884	1648.35	1	378.103	5865.31	4	384.91	5959.36	4	403.833	5814.97	4	513.525	1614.84	1	349.609	5878.16	4	368.516	5938.98	4	377.811	5746	4	517.777	1635.93	1	352.03	6189.98	4	362.837	5679.37	4	372.259	5950.39	4	344.038	5842.5	4	357.502	5591.25
363.156	6147.5	4	366.233	6269.98	4	375.079	6345.62	4	522.968	1570.8	1	378.185	6003.72	4	385.051	5713.32	4	404.021	5644.65	4	513.53	1722.57	1	349.726	6040.47	4	368.554	5771.13	4	377.935	5816.08	4	517.834	1590.86	1	352.046	5991.34	4	362.884	5720	4	372.306	5744.78	4	344.086	5662.44	4	357.537	5593.93
363.358	5953.63	4	366.233	6087.82	4	375.308	5832.99	4	522.975	1626.6	1	378.295	5870.75	4	385.076	5936.24	4	404.037	5656.51	4	513.592	1639.14	1	349.786	5635.84	4	368.653	6189.27	4	377.959	5832.07	4	517.895	1634.09	1	352.052	6307.51	4	363.059	5713.51	4	372.331	5865.29	4	344.153	5764.42	4	357.54	6185.35
363.403	5948.21	4	366.308	5873.39	4	375.353	5720.37	4	522.988	1673.36	1	378.392	5915.56	4	385.545	5844.28	4	404.085	5362.73	4	513.753	1710.1	1	349.838	5912.75	4	368.69	5773.73	4	378.035	5675.89	4	518.039	1568.64	1	352.067	5902.16	4	363.079	5759.11	4	372.346	5968.43	4	344.154	5820.71	4	357.71	5516.58
363.491	5869.24	4	366.361	5994.25	4	375.413	5960.12	4	523.072	1613.94	1	378.472	5780.11	4	385.676	5614.17	4	404.229	6013.6	4	513.753	1571.94	1	349.842	6212.27	4	368.744	5718.48	4	378.064	6308.13	4	518.072	1756.31	1	352.208	5932.34	4	363.134	5818.21	4	372.362	5691.67	4	344.185	5613.06	4	357.757	5669.38
363.571	5759.53	4	366.363	6009.03	4	375.593	5819.57	4	523.091	1604.17	1	378.528	5673.59	4	385.83	5708.72	4	404.332	5830.59	4	513.821	1708.81	1	349.843	6139.4	4	368.753	5859.02	4	378.136	5644.54	4	518.106	1675.64	1	352.25	6125.35	4	363.191	5860	4	372.4	5709.63	4	344.191	5750.68	4	357.766	6166.2
363.745	5934.3	4	366.468	5774.77	4	375.613	6094.91	4	523.211	1650.24	1	378.611	5591.36	4	385.946	5743.78	4	404.508	5604.5	4	513.9	1647.15	1	349.974	5730.88	4	368.887	5536.21	4	378.155	5643.75	4	518.215	1603.04	1	352.267	5718.43	4	363.208	5614.05	4	372.422	5663.71	4	344.212	5767.06	4	357.808	6385.08
363.758	5805.29	4	366.529	5783.06	4	375.703	6089.55	4	523.215	1647.34	1	378.684	5802.47	4	386.056	5658.04	4	404.564	5648.2	4	513.926	1656.63	1	350.038	6095.51	4	368.952	6330.64	4	378.19	5750.9	4	518.234	1724.55	1	352.349	5836.81	4	363.231	5662.16	4	372.49	5751.96	4	344.276	6112.72	4	357.895	5646.54
363.985	6094.18	4	366.545	6158.61	4	375.761	5936.48	4	523.331	1668.71	1	378.756	5937.15	4	386.116	5845.14	4	404.589	5738.09	4	513.928	1681.86	1	350.049	5984.18	4	368.959	5990.16	4	378.308	5893.5	4	518.245	1613.64	1	352.371	5845.09	4	363.307	5929.53	4	372.579	5905.59	4	344.281	6109.9	4	357.964	5900.8
363.998	5862.08	4	366.569	5910.57	4	375.843	5708.98	4	523.334	1848.97	1	378.872	6203.81	4	386.158	5999.21	4	405.015	5652.92	4	513.998	1567.82	1	350.057	5884.97	4	368.976	5990.24	4	378.359	5876.74	4	518.372	1647.46	1	352.4	5781.62	4	363.386	5607.28	4	372.747	5774.74	4	344.387	6163.87	4	358	5513.85
364.008	5605.92	4	366.606	5953.52	4	375.861	5748.65	4	523.349	1603.68	1	379.067	5838.25	4	386.238	5926.18	4	405.048	5632.57	4	514.016	1703.1	1	350.096	5927.47	4	368.986	5448.68	4	378.517	5708.33	4	518.384	1637.37	1	352.401	5544.6	4	363.404	5779.23	4	372.789	5910.82	4	344.433	5776.74	4	358.076	5935.76
364.131	5846.5	4	366.618	5806.53	4	375.873	6216.28	4	523.387	1667.54	1	379.181	5749	4	386.369	5685.99	4	405.066	6168.65	4	514.132	1640.76	1	350.111	5844.71	4	369.096	6177.63	4	378.54	5849.44	4	518.421	1762.85	1	352.537	6088.93	4	363.496	5706.85	4	372.833	5569.87	4	344.463	6029.41	4	358.174	5749.29
364.22	5704.46	4	366.687	5829.7	4	375.92	5581.28	4	523.495	1621.18	1	379.259	5844.86	4	386.376	6059.52	4	405.092	5763.61	4	514.166	1632.95	1	350.159	5896.94	4	369.129	5792.93	4	378.577	5936.61	4	518.429	1646.43	1	352.596	5694.75	4	363.51	5670.66	4	372.904	5569.08	4	344.464	5703.61	4	358.19	5841.44
364.268	5742.36	4	366.699	5675.13	4	376.114	5801.05	4	523.54	1681.57	1	379.302	5788.49	4	386.449	5603.59	4	405.13	5696.53	4	514.173	1580.37	1	350.189	6028.64	4	369.216	6022.74	4	378.58	5718.1	4	518.503	1627.8	1	352.647	5746.83	4	363.513	5958.47	4	372.908	5925.27	4	344.567	5850.61	4	358.229	5773.52
364.327	6313.79	4	366.781	5977.92	4	376.149	5946.62	4	523.543	1652.26	1	379.373	5876.22	4	386.537	5976.79	4	405.172	5643.62	4	514.19	1570.81	1	350.29	5833.04	4	369.222	5683.89	4	378.601	5979.46	4	518.625	1634.34	1	352.831	5759.58	4	363.521	5811.85	4	372.929	5676.55	4	344.701	5693.31	4	358.252	5616.46
364.39	5635.71	4	366.803	5740.29	4	376.153	5991.58	4	523.612	1639.28	1	379.42	6092.95	4	386.679	5895.44	4	405.187	5782.64	4	514.284	1599.76	1	350.381	6021.94	4	369.233	5802.86	4	378.607	5608.95	4	518.637	1581.12	1	352.879	5731.63	4	363.527	5689.5	4	372.946	5840.69	4	344.75	5700.45	4	358.427	5676.54
364.471	6082.18	4	366.961	5609.31	4	376.31	6185.14	4	523.624	1542.7	1	379.541	5741.98	4	386.729	6115.23	4	405.24	6016.06	4	514.34	1647.94	1	350.414	5715	4	369.236	5404.14	4	378.669	5742.15	4	518.665	1646.4	1	352.924	5991.81	4	363.572	5657.41	4	373.019	5903.78	4	344.81	5882.33	4	358.591	5652.13
364.476	5591.45	4	367.053	5604.66	4	376.407	6167.64	4	523.653	1572.45	1	379.564	5576.24	4	386.761	5524.24	4	405.264	5461.98	4	514.351	1658.92	1	350.457	5685.61	4	369.246	5648.01	4	378.781	5956.69	4	518.69	1601.47	1	352.933	5794.93	4	363.614	6183.19	4	373.047	6124.02	4	344.813	5833.95	4	358.613	5896.45
364.557	5761.63	4	367.086	5863.05	4	376.485	6254.12	4	523.692	1575.71	1	379.569	5903.38	4	386.843	5719.26	4	405.304	5697.49	4	514.535	1634.25	1	350.498	5713.91	4	369.31	6138.6	4	378.787	5578.82	4	518.705	1672.77	1	353.081	5903.61	4	363.625	5987.35	4	373.077	6124.26	4	344.815	5646.74	4	358.618	5830.08
364.608	5353.15	4	367.115	5701.96	4	376.606	5575.31	4	523.71	1648.91	1	379.748	5849.34	4	386.848	5699.83	4	405.357	5612.03	4	514.581	1606.88	1	350.506	5868.99	4	369.382	5661.15	4	378.982	5696.92	4	518.76	1676.81	1	353.34	6006.3	4	363.645	5843.33	4	373.193	5581.8	4	344.816	5451.93	4	358.703	6116.4
364.689	5912.1	4	367.127	5783.19	4	376.642	5642.74	4	523.805	1634.38	1	379.762	5595.94	4	386.873	5801.45	4	405.433	5522.27	4	514.625	1586.38	1	350.509	6176.75	4	369.403	5860.2	4	379.126	5613.09	4	518.856	1745.68	1	353.454	5972.22	4	363.685	5642.15	4	373.258	6449.66	4	344.88	6029.31	4	358.757	5744.22
364.701	5735.85	4	367.128	5890.51	4	376.644	5430.07	4	523.821	1616.19	1	379.905	5793.9	4	386.901	5848.99	4	405.531	5718.2	4	514.633	1673.94	1	350.75	6385.88	4	369.44	5809.78	4	379.139	5958.69	4	518.859	1755.34	1	353.468	5766.87	4	363.819	6011.36	4	373.268	5814.68	4	345.085	5735.37	4	358.839	6112.77
364.783	5418.36	4	367.226	6179.94	4	376.804	5673.96	4	523.851	1607.36	1	379.936	5868.54	4	386.972	5723.2	4	405.563	5804.98	4	514.702	1713.27	1	350.885	6019.79	4	369.442	5762.51	4	379.227	5635.25	4	518.963	1683.46	1	353.616	5849.01	4	363.853	5782.27	4	373.31	5964.95	4	345.507	5673.12	4	358.839	5468.08
364.98	5997.04	4	367.255	5647.56	4	376.821	5776.14	4	523.983	1750.5	1	380.221	5706.38	4	387.118	5492.53	4	405.581	5668.55	4	514.777	1727.83	1	350.97	5842.69	4	369.531	5850.91	4	379.229	5517.04	4	518.972	1566.57	1	353.734	5802.34	4	364.029	5940.83	4	373.37	5944.75	4	345.523	5774.77	4	358.848	6208.89
365.075	5903.59	4	367.286	5483.43	4	376.844	6210.07	4	524.072	1568.26	1	380.335	5656.84	4	387.163	5721.57	4	405.868	5805.54	4	514.803	1644.23	1	351.002	5799.44	4	369.549	6082.7	4	379.249	6026.44	4	518.997	1581.9	1	353.832	6327.47	4	364.078	5768.35	4	373.418	5798.02	4	345.745	5991.03	4	358.877	5611.85
365.138	5679.92	4	367.3	5817.02	4	376.903	5761.94	4	524.123	1657.15	1	380.357	5768.93	4	387.255	5623.08	4	405.901	5706.37	4	514.934	1551.97	1	351.053	5830.19	4	369.575	5562.31	4	379.251	5860.8	4	518.997	1568.39	1	353.877	5655	4	364.119	5784.88	4	373.424	6258.64	4	345.818	5812.43	4	358.929	5759.27
365.169	5673.4	4	367.336	5620.08	4	376.975	5616.71	4	524.267	1715.28	1	380.361	5489.51	4	387.448	6292.93	4	405.994	5824.17	4	514.941	1546.93	1	351.07	6213.86	4	369.651	5808.51	4	379.386	6124.66	4	519.015	1673.66	1	353.894	5774.31	4	364.161	5715.1	4	373.573	6106.93	4	345.879	6110.03	4	358.999	5749.12
365.316	6237.51	4	367.371	6123.07	4	376.987	6043.04	4	524.281	1736.96	1	380.435	5848.9	4	387.48	5828.04	4	406.033	5651.77	4	514.988	1617.38	1	351.132	5577.33	4	369.704	5650.43	4	379.479	5794.51	4	519.082	1742.08	1	353.899	6046.97	4	364.233	5705.26	4	373.583	5690.38	4	345.947	5665.48	4	359.018	6050.66
365.338	5664.68	4	367.456	5684.81	4	376.99	6176.91	4	524.311	1656.5	1	380.449	5478.37	4	387.602	5605.78	4	406.044	5771.15	4	515.007	1574.89	1	351.178	5928.42	4	369.719	5578.42	4	379.51	5757.85	4	519.098	1723.33	1	353.993	6074.16	4	364.341	5651.57	4	373.729	6037.9	4	345.974	5794.23	4	359.024	5469.59
365.34	5580.42	4	367.502	5794.95	4	377.063	6080.74	4	524.312	1700.89	1	380.468	5754.32	4	387.846	5850.2	4	406.065	5665.61	4	515.034	1641.15	1	351.278	5602.79	4	369.75	5659.51	4	379.637	5811.03	4	519.168	1671.65	1	354.128	6001.5	4	364.376	5809.61	4	373.878	5896.92	4	346.022	5785.9	4	359.028	5632.43
365.459	5621.62	4	367.55	5733.28	4	377.333	5511.53	4	524.318	1566.54	1	380.507	5605.67	4	387.856	5792.95	4	406.072	5605.62	4	515.139	1470.03	1	351.386	5822.63	4	370.005	5896.3	4	379.649	5840.19	4	519.197	1683.98	1	354.135	5897.18	4	364.405	5667.42	4	373.89	5919.6	4	346.115	5730.05	4	359.03	5710.35
365.48	5596.95	4	367.585	6232.37	4	377.398	5856.79	4	524.34	1685.27	1	380.599	5786.43	4	387.914	6278.49	4	406.107	5983.63	4	515.158	1760.66	1	351.44	5615.3	4	370.012	5645.24	4	380.005	5770.78	4	519.2	1618.07	1	354.164	5832.47	4	364.417	5846.01	4	374.019	5558.17	4	346.248	5850.23	4	359.128	5733.32
365.562	5780.87	4	367.69	5735.65	4	377.514	5852.07	4	524.363	1711.08	1	380.604	6040.37	4	388.15	5447.46	4	406.123	5666.36	4	515.262	1643.83	1	351.518	5654.18	4	370.017	5604.15	4	380.083	5762.71	4	519.364	1630.89	1	354.347	5637.41	4	364.444	5631.45	4	374.024	5924.58	4	346.279	5696	4	359.149	5641.22
365.582	5626.43	4	367.712	6144.38	4	377.517	5593.07	4	524.448	1757.34	1	380.933	5981.99	4	388.158	5716.13	4	406.232	5717.49	4	515.295	1672.73	1	351.575	5906.23	4	370.11	5758.5	4	380.1	5890.78	4	519.408	1710.49	1	354.347	6313.92	4	364.459	5763.69	4	374.126	5966.4	4	346.399	5677.69	4	359.153	6154.95
365.651	5655.21	4	367.847	5909.12	4	377.572	5705.24	4	524.462	1629.97	1	380.946	5562.81	4	388.451	5885.41	4	406.31	5731.69	4	515.32	1801.7	1	351.585	5782.27	4	370.156	5622.56	4	380.126	6012.28	4	519.421	1716.94	1	354.37	5930.68	4	364.525	6106.73	4	374.141	5785.12	4	346.513	5795.63	4	359.201	5699.71
365.666	5726.53	4	367.907	6076.48	4	377.595	5822.11	4	524.528	1594.16	1	381.071	5665.01	4	388.514	5768.14	4	406.336	5790.46	4	515.42	1647.49	1	351.612	6020.02	4	370.184	5600.47	4	380.279	5718.5	4	519.45	1662.01	1	354.438	6136.41	4	364.573	6004.38	4	374.141	5954.47	4	346.595	5713.43	4	359.256	5627.36
365.697	5725.72	4	367.938	5923.15	4	377.633	5876.68	4	524.578	1656.1	1	381.164	5581.14	4	388.525	5603.37	4	406.354	5663.18	4	515.437	1687.55	1	351.651	6163.48	4	370.205	5537.16	4	380.316	5754.67	4	519.458	1639.7	1	354.558	5862.24	4	364.579	6194.86	4	374.23	5850.32	4	346.628	5808.81	4	359.294	6076.41
365.836	6062.1	4	368.024	5864.64	4	377.689	5816.29	4	524.584	1652.06	1	381.478	5898.24	4	388.629	5828.75	4	406.479	5621.21	4	515.44	1646.64	1	351.688	6058.03	4	370.253	5913.98	4	380.346	5743.72	4	519.468	1563.75	1	354.574	5783.38	4	364.584	6202.03	4	374.494	5884.79	4	346.643	5880.86	4	359.43	5672.7
365.841	5441.9	4	368.224	5830.89	4	377.831	5996.02	4	524.586	1666.73	1	381.558	5690.42	4	388.639	5685.43	4	406.563	6063.68	4	515.535	1624.83	1	351.71	5849.64	4	370.286	5781.59	4	380.362	5811.02	4	519.478	1732.56	1	354.735	5592.77	4	364.642	5758.42	4	374.532	5717	4	346.651	5744.96	4	359.442	5579.35
366.064	5658.57	4	368.279	5846.74	4	377.846	6187.16	4	524.689	1668.09	1	381.567	6103.66	4	388.827	5569.91	4	406.57	5714.12	4	515.629	1658.71	1	351.714	5945.34	4	370.393	5836.81	4	380.45	5627.44	4	519.767	1605.53	1	354.809	5682.8	4	364.713	5748.58	4	374.573	5669.22	4	346.655	5742.69	4	359.445	5662.76
366.162	5283.06	4	368.398	6239.89	4	377.924	5852.32	4	524.724	1677.79	1	381.599	5811.41	4	388.953	6179.78	4	406.755	5979.76	4	515.701	1600.11	1	351.803	5562.44	4	370.411	5724.52	4	380.45	5445.12	4	519.771	1681.3	1	354.831	5935.08	4	364.756	5676.34	4	374.738	5605.07	4	346.698	5835.26	4	359.463	5914.14
366.192	5699.01	4	368.399	5423.74	4	378.077	5654.18	4	524.782	1588.6	1	381.637	6027.44	4	389.078	5622.94	4	406.801	5659.85	4	515.744	1681.79	1	351.868	5766.35	4	370.474	5957.8	4	380.503	5738.85	4	519.807	1633.32	1	354.858	5846.74	4	364.848	6002.67	4	374.754	5610.73	4	346.975	5762.84	4	359.553	5582.33
366.304	5813.06	4	368.444	5776.88	4	378.091	6362.54	4	524.869	1580.71	1	381.73	6151.12	4	389.168	5624.83	4	406.875	5747.04	4	515.812	1731.37	1	351.902	5997.22	4	370.49	5859.11	4	380.59	5857.63	4	519.867	1600.99	1	354.89	5923.74	4	364.851	5624.38	4	374.785	5707.84	4	347.054	5635.89	4	359.608	6013.96
366.417	5744.63	4	368.497	5795.83	4	378.098	5574.19	4	524.991	1657.16	1	381.743	6078.81	4	389.2	5839.77	4	406.882	5530.71	4	516.001	1664.39	1	351.904	5719.38	4	370.52	5734.54	4	380.651	5833.07	4	519.915	1771.96	1	354.943	5629.07	4	364.856	5752.42	4	374.799	5840.09	4	347.211	5934.96	4	359.618	5958.81
366.577	5609.59	4	368.541	6161.59	4	378.192	5876.44	4	525.072	1678.33	1	381.985	6041.77	4	389.306	5749.72	4	406.884	5758.48	4	516.055	1654.34	1	351.915	6367.64	4	370.618	5782.19	4	380.71	6043.43	4	519.941	1703.87	1	354.991	5870.69	4	364.938	5855.37	4	374.824	5901.3	4	347.266	5789.84	4	359.874	5506.91
366.581	5796.48	4	368.548	5457.28	4	378.196	5887.41	4	525.08	1727.77	1	382.021	5830.6	4	389.375	5642.03	4	406.973	5943.19	4	516.183	1708.66	1	351.929	5969.61	4	370.625	5638.71	4	380.727	6125.43	4	519.953	1683.09	1	355.135	5780.49	4	365.02	5694.99	4	374.857	6159.84	4	347.367	5776.91	4	359.877	5573.55
366.587	5861.29	4	368.674	5714.71	4	378.312	5667.28	4	525.189	1624.87	1	382.26	5801.72	4	389.609	5810.71	4	407.05	6014.49	4	516.232	1616.68	1	352.069	6284.75	4	370.707	6144.78	4	380.758	6061.66	4	519.965	1612.16	1	355.187	5810.31	4	365.037	5873.29	4	374.874	5800.72	4	347.422	5576.23	4	359.884	5949.87
366.61	5645.69	4	368.811	6098.49	4	378.35	5841.67	4	525.232	1720.03	1	382.272	5765.5	4	389.841	6138.33	4	407.113	5453.5	4	516.328	1621.51	1	352.078	6299.11	4	370.744	5786.92	4	380.774	5858.81	4	519.967	1665.28	1	355.266	5596.06	4	365.22	5689.57	4	374.928	6301.62	4	347.474	5840.98	4	359.935	5520.97
366.79	5916.36	4	368.898	6094.88	4	378.417	5997.28	4	525.328	1695.13	1	382.341	5899.9	4	389.878	6153.78	4	407.244	5607.96	4	516.331	1684.47	1	352.166	6106.02	4	370.756	6167.64	4	380.807	5831.91	4	520.011	1648.76	1	355.277	6149.44	4	365.236	5647.93	4	375.028	5719.41	4	347.498	5936.15	4	360.002	5818.65
367.112	5877.19	4	368.911	5790.26	4	378.515	5823.7	4	525.377	1617.7	1	382.355	6040.74	4	389.888	5749.73	4	407.249	6017.36	4	516.342	1542.53	1	352.34	6071.06	4	370.864	6111.35	4	380.826	5644.35	4	520.02	1575.21	1	355.328	5897.61	4	365.265	5637.71	4	375.031	6010.95	4	347.532	5974.97	4	360.038	6176.36
367.194	5763.7	4	368.913	5744.48	4	378.523	6391.41	4	525.451	1666.14	1	382.491	5682.38	4	389.912	5740.63	4	407.556	5454.34	4	516.38	1639.66	1	352.4	5955.23	4	370.949	5706.94	4	380.884	5818.43	4	520.023	1646.52	1	355.355	6185.27	4	365.407	6367.01	4	375.076	5763.07	4	347.637	5708.37	4	360.044	6198.53
367.264	6366.45	4	368.946	5799.65	4	378.547	5575.99	4	525.497	1654.39	1	382.615	5786.64	4	389.93	5592.65	4	407.7	5698.15	4	516.407	1716.99	1	352.42	5846.47	4	370.958	5866.57	4	380.917	5661.7	4	520.054	1763.59	1	355.397	5948.31	4	365.797	5703.15	4	375.141	6302.81	4	347.667	5740.84	4	360.044	5712.25
367.298	5945.89	4	369.105	5858.01	4	378.635	6267.68	4	525.514	1786.65	1	382.709	5748.69	4	390.069	5698.2	4	407.865	5542.04	4	516.452	1758.09	1	352.468	5599.94	4	370.977	5573.28	4	380.929	5817.41	4	520.058	1583.13	1	355.406	5941.72	4	366.096	5836.73	4	375.146	5877.71	4	347.731	6027.9	4	360.076	5809.7
367.417	5648.93	4	369.11	5969.83	4	378.676	5924.75	4	525.517	1598.72	1	382.765	6263.26	4	390.171	5786.71	4	407.874	5586.45	4	516.49	1593.54	1	352.584	5958.7	4	370.985	5796.1	4	380.973	5850.93	4	520.09	1631.14	1	355.505	5710.2	4	366.114	5805.15	4	375.199	6314.25	4	347.881	5733.65	4	360.114	5458.35
367.455	5867.32	4	369.199	6208	4	378.687	5540.77	4	525.549	1665.83	1	382.788	5631.53	4	390.237	5773.94	4	408.066	5912.17	4	516.593	1621.95	1	352.657	5672.97	4	371.022	5929.05	4	380.999	6047.24	4	520.091	1700.79	1	355.517	5718	4	366.13	5795.29	4	375.226	5931.66	4	347.898	5861.22	4	360.18	5771.94
367.476	5776.75	4	369.32	5475.87	4	378.694	5827.81	4	525.662	1723.4	1	382.812	5822.04	4	390.302	5819.04	4	408.203	5731.03	4	516.714	1548.97	1	352.676	6255.65	4	371.057	5878.06	4	381.03	5404.61	4	520.128	1639.5	1	355.55	5666.47	4	366.212	5374.18	4	375.257	5986.77	4	347.946	6436.95	4	360.23	5865.69
367.496	5631.93	4	369.334	6397.34	4	378.712	6025.66	4	525.723	1622.3	1	382.834	5729.81	4	390.448	5648.14	4	408.208	5750.26	4	516.739	1739.62	1	352.725	5710.07	4	371.082	5712.38	4	381.031	5882.57	4	520.129	1744.82	1	355.618	6053.15	4	366.264	5413.39	4	375.3	5972.63	4	347.95	5847.42	4	360.241	6129.65
367.598	5996.91	4	369.337	5673.39	4	378.784	5801.04	4	525.751	1571.9	1	382.914	5797.09	4	390.461	5485.18	4	408.353	5710.25	4	516.761	1616.48	1	352.766	5923.44	4	371.207	5965.73	4	381.034	6085.19	4	520.13	1704.22	1	355.648	6046.22	4	366.319	5795.65	4	375.399	5790.69	4	348.136	5996.6	4	360.302	5681.45
367.703	5674.2	4	369.344	5628.57	4	378.816	5793.15	4	525.849	1666.27	1	382.947	5918.36	4	390.542	5774.86	4	408.381	5806.56	4	516.922	1693.88	1	352.875	5844.47	4	371.225	5719.91	4	381.184	5783.43	4	520.132	1673.54	1	356.025	5734.21	4	366.39	5724.97	4	375.441	5644.79	4	348.152	5950.5	4	360.322	6285.09
367.709	5691.49	4	369.407	5950.73	4	378.885	5952.05	4	525.901	1632.77	1	383.086	5732.52	4	390.653	5603.6	4	408.398	5812.73	4	516.943	1679.6	1	352.96	5724.02	4	371.236	5830.98	4	381.249	5770.45	4	520.215	1633.45	1	356.063	6200.3	4	366.448	5969.31	4	375.466	6384.1	4	348.203	5752.37	4	360.36	5961.47
367.775	5579.3	4	369.479	5800.57	4	379.035	5577.96	4	525.974	1762.86	1	383.122	5843.27	4	390.851	5700.78	4	408.554	5691.5	4	516.947	1622.11	1	352.984	5852.26	4	371.263	6003.31	4	381.259	5539.61	4	520.238	1711.68	1	356.087	5587.95	4	366.471	6194.9	4	375.492	6001.48	4	348.227	5888.47	4	360.499	5803.44
367.777	5862.52	4	369.512	5617.76	4	379.108	6228.3	4	525.974	1766.84	1	383.365	5944.31	4	390.87	5737.27	4	408.608	5702.65	4	516.963	1709.56	1	353.002	6133.82	4	371.271	5508.58	4	381.322	5636.95	4	520.282	1665.28	1	356.21	5856.38	4	366.654	5727.5	4	375.493	5978.53	4	348.245	5799.53	4	360.522	5625.73
367.924	5818	4	369.525	5642.18	4	379.164	5571.29	4	525.975	1563.84	1	383.422	5704.98	4	390.967	5699.37	4	408.621	5499.21	4	517.029	1557.99	1	353.036	5828.97	4	371.296	5826.58	4	381.327	5671.94	4	520.297	1689.56	1	356.22	6039.34	4	366.732	6335.69	4	375.541	5570.6	4	348.258	5577.88	4	360.569	5848.54
368.076	5668.74	4	369.612	5853.15	4	379.199	5779.02	4	526.013	1630.03	1	383.634	5951.09	4	390.991	5690.28	4	408.735	5661.49	4	517.062	1686.81	1	353.053	5640.14	4	371.384	5700.91	4	381.335	5810.96	4	520.392	1718.7	1	356.25	6198.31	4	366.77	5742.97	4	375.567	5842.48	4	348.277	5713.93	4	360.576	5644.99
368.208	6073.44	4	369.63	5686.33	4	379.284	5878.95	4	526.024	1688.88	1	383.88	5761.22	4	391.134	5723.25	4	408.804	5737.84	4	517.069	1861.71	1	353.057	6019.26	4	371.395	5670.72	4	381.398	5613.16	4	520.58	1736.53	1	356.271	5928.23	4	366.795	5764.18	4	375.584	5837.48	4	348.315	5648.9	4	360.616	5758.56
368.254	5752.75	4	369.644	5910.02	4	379.302	5511	4	526.029	1690.06	1	383.896	5744.17	4	391.199	5985.99	4	408.939	5477.7	4	517.171	1607.85	1	353.081	5689.09	4	371.458	5780.71	4	381.403	5749.57	4	520.682	1549.18	1	356.289	5791.1	4	366.845	6026.36	4	375.621	5634.63	4	348.335	5869.23	4	360.657	5995.82
368.268	5644.87	4	369.724	5746.78	4	379.305	6059.26	4	526.113	1646.63	1	383.949	5849.55	4	391.365	5839.72	4	409.086	5905.19	4	517.252	1576.92	1	353.084	6046.67	4	371.503	5643.74	4	381.414	5853.11	4	520.691	1652.58	1	356.396	5887.67	4	366.923	5988.83	4	375.67	5993.91	4	348.337	5670.28	4	360.677	5692.4
368.411	6162.02	4	369.726	5831.02	4	379.316	5876.27	4	526.189	1633.05	1	384.392	5869.29	4	391.406	6004.95	4	409.181	5487.5	4	517.28	1613.39	1	353.138	5779.5	4	371.508	5651.8	4	381.487	5844.75	4	520.701	1614.77	1	356.432	5737.89	4	367.025	5920.07	4	375.751	5417.04	4	348.359	5699.63	4	360.709	5781.15
368.414	5572.48	4	369.783	6595.55	4	379.33	5856.45	4	526.25	1577.23	1	384.43	6013.55	4	391.443	5580.34	4	409.224	5585.34	4	517.286	1601.97	1	353.147	6083.52	4	371.535	5784.47	4	381.504	6172.06	4	520.746	1689.56	1	356.476	5966.55	4	367.067	5644.85	4	375.779	5944.87	4	348.4	5665.35	4	360.746	6070.99
368.443	6040.2	4	369.806	6385.59	4	379.429	6121.13	4	526.264	1673.1	1	384.444	5792.71	4	391.457	5744.11	4	409.277	5749.91	4	517.318	1660.67	1	353.212	5742.95	4	371.539	5743.33	4	381.549	5665.89	4	520.765	1660.37	1	356.48	6172.53	4	367.071	5688.26	4	375.822	5864.1	4	348.419	5757	4	360.749	5903.4
368.455	5864.66	4	369.921	5757.51	4	379.635	5965.4	4	526.353	1507.94	1	384.451	5896.37	4	391.461	6060.99	4	409.315	5539.56	4	517.362	1601.33	1	353.296	5469.06	4	371.587	5748.32	4	381.622	5979.08	4	520.789	1659.47	1	356.591	5810.09	4	367.088	6371.47	4	375.919	6188.37	4	348.473	5996.51	4	360.777	5903.8
368.474	5652.47	4	370.165	5791.12	4	379.658	5594.32	4	526.452	1656.3	1	384.502	5815.4	4	391.527	5605.32	4	409.328	5639.51	4	517.379	1684.74	1	353.32	5650.98	4	371.657	5709.94	4	381.735	5754.67	4	520.85	1505.69	1	356.69	5879.76	4	367.154	6045.59	4	375.958	5689.3	4	348.546	5708.09	4	360.784	5861.24
368.484	6352.78	4	370.173	5868.28	4	379.689	6129.26	4	526.495	1627	1	384.547	6078.54	4	391.551	6110.24	4	409.337	5801.76	4	517.433	1625.94	1	353.385	6398.21	4	371.683	5633.21	4	381.75	5641.49	4	520.859	1664.2	1	356.708	5563.17	4	367.179	6120.25	4	376.014	5771.48	4	348.549	5545.69	4	360.784	5611.16
368.59	5796.13	4	370.19	6207.52	4	379.705	5672.37	4	526.53	1708.52	1	384.549	5644.49	4	391.556	5829.19	4	409.374	5977.13	4	517.438	1648.65	1	353.484	5762.45	4	371.725	6180.28	4	381.823	5924.47	4	520.878	1614.37	1	356.754	5651.49	4	367.203	5856.92	4	376.033	5795.78	4	348.567	5869.12	4	360.794	5733.02
368.609	6083.29	4	370.213	5780.25	4	379.77	5458.47	4	526.572	1693.54	1	384.634	5772.99	4	391.648	5887.08	4	409.614	5728.39	4	517.505	1584.52	1	353.495	6058.04	4	371.743	5863.34	4	381.838	6084.07	4	520.992	1606.55	1	356.791	6069.38	4	367.208	5855.07	4	376.036	5991.6	4	348.593	5870.3	4	360.804	5665.42
368.697	5875.09	4	370.261	5728.67	4	379.809	5809.42	4	526.576	1707	1	384.706	5948.63	4	391.659	5755.46	4	409.617	5931.6	4	517.649	1706.52	1	353.597	5682.39	4	371.769	6290.51	4	381.858	6195.28	4	521	1671.06	1	356.826	5795.99	4	367.221	5603.86	4	376.067	5858.11	4	348.745	5559.52	4	360.966	5667.88
368.707	5846.53	4	370.286	6005.07	4	379.873	6378.65	4	526.595	1578.13	1	384.714	5735.42	4	391.742	5755.04	4	409.654	6106.59	4	517.74	1599.08	1	353.625	5733.06	4	371.832	5704.5	4	381.926	6158.27	4	521.002	1627.52	1	356.842	6040.45	4	367.246	5772.65	4	376.108	6129.51	4	348.753	5796.87	4	361.014	6075.17
368.754	6312.07	4	370.319	6081.22	4	379.886	5908.64	4	526.666	1703.07	1	384.929	5818.38	4	391.745	5954.97	4	409.823	5540.77	4	517.776	1622.26	1	353.641	5878.68	4	371.883	5592.65	4	381.933	5735	4	521.029	1735.81	1	356.881	5921.16	4	367.246	5783.92	4	376.16	5527.42	4	348.775	6011.87	4	361.1	5660.47
368.801	5782.38	4	370.584	6228.08	4	379.924	5615.68	4	526.721	1592.98	1	384.931	5712.34	4	391.877	6152.32	4	409.86	6016.07	4	517.779	1631.68	1	353.671	5868.03	4	371.919	5815.55	4	381.98	5979.31	4	521.034	1735.61	1	356.891	5740.25	4	367.26	5924.68	4	376.163	5785.99	4	348.818	5661.49	4	361.105	5832.45
368.816	5668.13	4	370.668	5984.27	4	380.053	5819.26	4	526.754	1697.55	1	385.095	6016.67	4	391.912	5752.91	4	409.976	5233.13	4	517.806	1686.46	1	353.719	5812.43	4	371.937	5727.25	4	382.048	5660.03	4	521.064	1543.56	1	356.893	5861.61	4	367.263	5757.93	4	376.191	5825.36	4	348.82	5910.25	4	361.115	5942.5
368.846	5822.47	4	370.67	5819.64	4	380.072	5818.2	4	526.788	1707.98	1	385.154	5740.01	4	391.919	5755.79	4	409.998	5849.76	4	517.835	1648.48	1	353.771	6089.89	4	372.089	6112.31	4	382.073	5619.92	4	521.087	1647.55	1	356.985	6044.64	4	367.266	5479.62	4	376.197	5810.49	4	348.907	6034.21	4	361.147	5537.61
368.888	5963.93	4	370.674	5684.15	4	380.084	5879.75	4	526.793	1708	1	385.172	6234.44	4	392.04	6094.16	4	410.038	5589.8	4	517.933	1712.14	1	353.932	5703.05	4	372.127	6111.71	4	382.215	5687.27	4	521.106	1564.24	1	357.017	6126.16	4	367.321	5903.55	4	376.203	5839.5	4	348.945	5996.01	4	361.156	5976.68
368.902	5265.24	4	370.683	5782.08	4	380.248	6042.4	4	526.809	1562.29	1	385.231	5725.64	4	392.089	6057.74	4	410.109	5430.9	4	517.963	1661.81	1	354.105	5800.69	4	372.166	5988.99	4	382.23	5662.94	4	521.107	1684.63	1	357.035	5509.04	4	367.335	5845.9	4	376.25	5602.59	4	349.045	5685.18	4	361.251	5810.81
368.913	5990.19	4	370.777	5779.32	4	380.278	5951.87	4	526.829	1642.86	1	385.346	5756.03	4	392.211	5670.06	4	410.197	5680.89	4	518.085	1530.7	1	354.168	5660.98	4	372.184	5671.42	4	382.231	5696.8	4	521.108	1567.65	1	357.108	5997.84	4	367.417	5816.63	4	376.26	5766.55	4	349.074	5697.06	4	361.43	5834.23
368.957	5791.86	4	370.799	5664.89	4	380.324	5813.27	4	526.835	1587.89	1	385.52	5695.8	4	392.215	5473.32	4	410.221	5718.55	4	518.109	1666.65	1	354.177	6019.49	4	372.235	5821.9	4	382.252	5818.31	4	521.148	1568.04	1	357.136	5752.98	4	367.504	6097.23	4	376.296	5577.14	4	349.087	5635.5	4	361.444	6262.25
368.981	5666.07	4	370.869	6085.53	4	380.326	5616.74	4	526.85	1757.01	1	385.527	5802.77	4	392.23	5756.93	4	410.246	5817.89	4	518.145	1650.91	1	354.335	5675.54	4	372.274	6054.73	4	382.255	5925.39	4	521.148	1629.57	1	357.218	5580.43	4	367.505	5835.23	4	376.32	5760.63	4	349.093	5945.4	4	361.463	6043.2
368.995	5732.38	4	370.88	5869.72	4	380.565	5991.91	4	526.879	1577.51	1	385.571	5837.31	4	392.546	6080.35	4	410.347	5706.82	4	518.163	1601.59	1	354.343	5978.65	4	372.275	6094.46	4	382.265	5964.23	4	521.161	1701.3	1	357.233	5836.99	4	367.59	5669.61	4	376.335	6091.3	4	349.112	5746.41	4	361.522	5696.84
369.006	6294.08	4	370.888	5905.8	4	380.576	5701.77	4	526.962	1589.6	1	385.58	5825.67	4	392.59	5984.74	4	410.437	5931.81	4	518.275	1684.78	1	354.4	6005.6	4	372.379	5633.91	4	382.305	5642.89	4	521.174	1695.22	1	357.291	5653.94	4	367.61	5907.38	4	376.372	5669.2	4	349.12	5881.65	4	361.584	5752.64
369.059	5930.66	4	370.905	5998.94	4	380.605	5822.46	4	527.002	1670.73	1	385.664	5754.02	4	392.867	5803.68	4	410.468	5946.34	4	518.328	1629.16	1	354.419	5918.4	4	372.461	5651.55	4	382.34	5855.34	4	521.205	1619.34	1	357.316	6127.38	4	367.719	5821.06	4	376.391	5930.19	4	349.359	5727.43	4	361.613	5549.79
369.084	6144.59	4	370.976	5631.23	4	380.704	5680.92	4	527.043	1695.56	1	385.743	5736.43	4	392.89	5859.55	4	410.527	5919.66	4	518.378	1532.09	1	354.459	5862.01	4	372.48	5657.93	4	382.343	5589.23	4	521.211	1592.3	1	357.39	6277.8	4	367.739	5841.26	4	376.419	6260.06	4	349.373	5766.26	4	361.623	5636.2
369.127	5611.4	4	371.049	5656.08	4	380.724	5938.67	4	527.079	1681.96	1	385.752	5821.78	4	392.899	6237.79	4	410.592	5562.61	4	518.43	1613.69	1	354.511	5733.84	4	372.615	5886.09	4	382.418	5793.94	4	521.211	1661.17	1	357.432	5668.21	4	367.74	5808.94	4	376.466	5880.31	4	349.398	5947.45	4	361.628	5892.51
369.218	6192.12	4	371.223	5848.58	4	380.797	5430.51	4	527.101	1602.41	1	385.804	5724.66	4	392.974	5655.59	4	410.675	5969.23	4	518.437	1656.06	1	354.521	6253.77	4	372.66	5855.97	4	382.452	5874.21	4	521.215	1690.61	1	357.446	5874.5	4	367.933	5618.81	4	376.559	5666.27	4	349.411	6042.1	4	361.674	5618.64
369.456	5732.59	4	371.223	5791.58	4	380.881	5735.03	4	527.153	1854.69	1	385.81	5594.54	4	393.104	5588.99	4	410.708	6191.42	4	518.439	1584.56	1	354.542	6036.31	4	372.701	5803.71	4	382.457	5830.8	4	521.3	1609.3	1	357.511	5879.77	4	367.973	5623.22	4	376.637	5648.89	4	349.427	5518.58	4	361.692	5701.45
369.517	6177.97	4	371.251	5783.26	4	380.911	5804.92	4	527.179	1676.93	1	385.827	5648.21	4	393.117	5687.35	4	410.764	5615.8	4	518.478	1660.1	1	354.607	5676.66	4	372.725	6176.01	4	382.544	5624.67	4	521.443	1647.08	1	357.583	5564.88	4	367.996	5918.89	4	376.657	5589.09	4	349.439	5810.5	4	361.718	5674.46
369.54	5581.34	4	371.314	5754.1	4	380.929	5702.22	4	527.179	1639.83	1	385.938	5666.25	4	393.206	5840.8	4	410.8	5644	4	518.683	1772.09	1	354.779	5583.73	4	372.747	5631.96	4	382.616	5705.14	4	521.462	1612.81	1	357.62	5828.19	4	368.057	5787.32	4	376.745	5940.23	4	349.553	6176.43	4	361.785	5655.35
369.636	5740.61	4	371.515	5847.78	4	380.932	5553.13	4	527.195	1747.14	1	385.963	5560.64	4	393.222	5862.82	4	410.801	5755.04	4	518.711	1650.48	1	354.855	5983.88	4	372.752	5748.81	4	382.661	5673.18	4	521.469	1682.12	1	357.732	5835.26	4	368.084	6000.74	4	376.797	5607.33	4	349.555	5629.85	4	361.819	5649.18
369.709	5639.05	4	371.617	5630.33	4	381.008	5722.94	4	527.216	1576.73	1	386.257	6010.82	4	393.231	5365.67	4	410.807	5851.22	4	518.719	1673.78	1	354.927	5907.03	4	372.775	5826.74	4	382.661	5737.09	4	521.472	1625.45	1	357.756	5847.07	4	368.099	6299.31	4	376.8	5672.97	4	349.596	5773.1	4	361.851	5699.1
369.726	5755.65	4	371.625	5631.23	4	381.089	5732.59	4	527.272	1604.28	1	386.285	5791.22	4	393.266	5697.89	4	410.852	5568.6	4	518.741	1679.26	1	354.947	5830.61	4	372.94	5713.25	4	382.713	5668.81	4	521.614	1659.58	1	357.781	6001.16	4	368.106	5669.21	4	376.812	6069.07	4	349.653	5686.49	4	361.914	5746.49
369.814	5764.07	4	371.671	5597.96	4	381.134	5843.94	4	527.471	1606.09	1	386.354	5811.87	4	393.299	5577.91	4	410.882	5534.42	4	518.841	1601.54	1	355.003	5650.13	4	373.024	5756.32	4	382.786	5868.86	4	521.663	1738.45	1	357.79	5899.61	4	368.11	6118.84	4	376.866	5914.11	4	349.806	5691.38	4	361.972	5773.38
369.855	5496.18	4	371.676	5909	4	381.134	5762.6	4	527.605	1719.1	1	386.367	5845.44	4	393.39	6085.45	4	410.887	5589.48	4	518.847	1583.79	1	355.098	5751.86	4	373.06	5553.09	4	382.826	5681.65	4	521.687	1739.73	1	357.878	5837.45	4	368.139	5994.66	4	376.867	5801.82	4	349.909	6187.29	4	361.981	5910.53
369.857	5609	4	371.68	5790.84	4	381.201	6175.59	4	527.62	1608.14	1	386.387	5941.48	4	393.475	5722.75	4	410.914	5991.46	4	518.849	1611.3	1	355.208	5903.33	4	373.093	5761.24	4	382.957	5809.94	4	521.71	1647.84	1	358.02	5940.95	4	368.154	5564.97	4	376.874	5805.61	4	349.957	5836.92	4	362.003	5976.83
369.882	6199.5	4	371.684	6286.53	4	381.236	5558.89	4	527.682	1686.74	1	386.442	5863.67	4	393.501	5759.73	4	410.992	5698.6	4	518.87	1629.54	1	355.263	6093.55	4	373.113	5945.17	4	383.02	5735.2	4	521.725	1701.53	1	358.09	5915.38	4	368.171	5647.49	4	376.924	6264.95	4	349.971	5978.91	4	362.013	5674.4
369.899	5672.81	4	371.796	5861.19	4	381.245	5899.43	4	527.727	1599.17	1	386.593	5951.97	4	393.589	5679.58	4	411.049	5961.48	4	518.878	1612.24	1	355.291	6346.73	4	373.147	5854.75	4	383.023	5739.07	4	521.759	1563.98	1	358.272	6219.99	4	368.208	5807.51	4	376.936	5699.65	4	349.972	5969.85	4	362.062	6153.09
370.019	5523.35	4	371.9	5769.86	4	381.343	5821.04	4	527.745	1591	1	386.683	6013.12	4	393.634	5732.63	4	411.147	6006.41	4	518.894	1668.29	1	355.428	5861.03	4	373.168	5609.99	4	383.024	5760.27	4	521.764	1591.72	1	358.281	5861.25	4	368.23	5675.78	4	377.023	5698.45	4	350.055	5587.55	4	362.106	5672.98
370.042	5628.42	4	371.91	5855.01	4	381.348	6021.84	4	527.778	1734.5	1	387.11	5747.42	4	393.661	5853.06	4	411.264	5990.86	4	518.912	1628.46	1	355.523	5814.8	4	373.279	5878.54	4	383.124	5562.29	4	521.773	1666.5	1	358.325	5811.79	4	368.232	5778.91	4	377.043	5915.36	4	350.149	5676.17	4	362.122	5616.29
370.151	5923.29	4	371.91	5938.51	4	381.446	6097.31	4	527.788	1899.21	1	387.262	5730.89	4	393.692	5948.23	4	411.303	5458.13	4	518.944	1650.64	1	355.552	5631.14	4	373.305	5824.47	4	383.377	5851.34	4	521.793	1715.5	1	358.34	5730.37	4	368.292	5856.48	4	377.13	5613.26	4	350.309	6156.67	4	362.218	5824.08
370.158	5633.55	4	372.103	5771.33	4	381.456	6113.16	4	527.819	1646.27	1	387.298	5723.23	4	393.756	5782.88	4	411.443	5829.48	4	518.987	1633.35	1	355.599	5865.01	4	373.305	5721.04	4	383.398	5343.9	4	521.803	1646.05	1	358.34	5682.87	4	368.296	6074.05	4	377.132	5764.94	4	350.326	6382.49	4	362.24	6036.94
370.169	5764.59	4	372.11	5960.17	4	381.599	6152.5	4	527.868	1538.9	1	387.309	6111.86	4	393.828	5888.76	4	411.49	5636.49	4	519.036	1568.85	1	355.6	5724.05	4	373.338	5790.46	4	383.411	5674.43	4	521.812	1670.04	1	358.344	5660.39	4	368.431	6190.6	4	377.217	5721.35	4	350.34	5605.39	4	362.48	5472.08
370.18	5784.12	4	372.326	6166.17	4	381.615	6024.67	4	527.875	1746.03	1	387.402	5550.02	4	393.843	5935.59	4	411.609	5820.46	4	519.289	1592.51	1	355.683	5853.25	4	373.359	5771.55	4	383.459	5855.35	4	521.848	1703.29	1	358.411	5700.62	4	368.487	5705.36	4	377.241	5615.25	4	350.383	5831.29	4	362.66	5866.78
370.24	5876.72	4	372.335	5861.69	4	381.632	5725.07	4	527.951	1666.86	1	387.412	5893.94	4	393.9	5714.84	4	411.626	5942.23	4	519.296	1619.27	1	355.7	6306.03	4	373.432	6131.91	4	383.505	5604.71	4	521.873	1637.28	1	358.504	6085.33	4	368.502	5706.6	4	377.242	5573.99	4	350.586	5649.45	4	362.668	5713.51
370.295	5644.05	4	372.337	6010.39	4	381.737	6327.01	4	528.137	1677.74	1	387.636	6097.76	4	393.952	5724.13	4	411.651	6017.87	4	519.306	1644.57	1	355.708	5918.4	4	373.451	5866.73	4	383.515	5625.94	4	521.916	1655.53	1	358.55	5702.51	4	368.527	6051.09	4	377.492	6108.36	4	350.621	5516.16	4	362.761	6369.54
370.3	5738.48	4	372.369	5952.59	4	381.743	5781.68	4	528.148	1755.32	1	387.689	5843.68	4	394.174	5747.32	4	411.661	5655.73	4	519.353	1713.83	1	355.715	5952.74	4	373.469	5796.18	4	383.53	5690.89	4	521.92	1777.8	1	358.579	5726.54	4	368.533	5827.01	4	377.531	5706.81	4	350.643	6174.05	4	362.782	5995.98
370.403	5856.35	4	372.499	5699.31	4	381.8	5824.19	4	528.251	1671.85	1	387.907	6068.84	4	394.193	5542.47	4	411.691	5702.71	4	519.371	1576.77	1	355.718	5905.4	4	373.478	5775.6	4	383.538	5671.61	4	521.947	1690.83	1	358.583	6068.51	4	368.621	6107.59	4	377.608	5900.77	4	350.66	5880.99	4	362.803	5727.84
370.463	5385.57	4	372.596	5842.42	4	381.867	5878.64	4	528.35	1664.03	1	387.948	5716.72	4	394.196	5736.85	4	411.7	5677.52	4	519.392	1590.55	1	355.81	6228.78	4	373.684	5667.35	4	383.59	5460.92	4	521.958	1774.94	1	358.596	5833.22	4	368.638	5852.02	4	377.658	5761.96	4	350.663	5843.58	4	362.809	5834.29
370.519	5970.01	4	372.674	5555.79	4	381.883	5893.65	4	528.434	1596.13	1	387.999	5745.53	4	394.235	5810.03	4	411.743	6028.91	4	519.399	1618.59	1	355.851	5847.35	4	373.696	6051.33	4	383.61	5643.03	4	522.013	1640.65	1	358.646	5643.15	4	368.743	5674.8	4	377.658	5499.98	4	350.753	5736.31	4	362.821	6249.26
370.536	5974.41	4	372.675	6103.83	4	381.968	5571.04	4	528.485	1569.23	1	388.147	5685.86	4	394.267	5648.52	4	411.866	5927.78	4	519.494	1586.74	1	355.885	5530.06	4	373.707	5877.06	4	383.645	5907.07	4	522.014	1729.19	1	358.714	5896.99	4	368.777	5617.46	4	377.664	5880.2	4	350.789	5608.61	4	362.897	6053.74
370.607	5679.33	4	372.676	5812.64	4	381.986	6129.27	4	528.509	1771.93	1	388.271	5690.05	4	394.342	5929.24	4	411.91	5758.47	4	519.535	1678.21	1	355.889	5711.37	4	373.752	6041.97	4	383.665	5768.58	4	522.021	1641.21	1	358.77	5881.79	4	368.785	6039.28	4	377.674	5783.91	4	350.854	5564.75	4	362.99	5656.47
370.654	5433.13	4	372.689	5877.34	4	382	5894.91	4	528.576	1609.93	1	388.271	5655.61	4	394.343	5778.06	4	411.92	5810.12	4	519.556	1677.63	1	355.942	5814.41	4	373.756	5911.85	4	383.703	5589.01	4	522.048	1570.98	1	358.778	5640.61	4	368.794	5744.14	4	377.929	5660.83	4	350.859	5744.99	4	363.019	5737.1
370.67	5967.88	4	372.813	5940.72	4	382.001	5588.72	4	528.639	1608.37	1	388.394	5721.78	4	394.383	5532.54	4	411.979	5714.94	4	519.591	1716.94	1	355.958	5948.93	4	373.761	6187.15	4	383.709	5920.19	4	522.124	1527.03	1	358.781	6070.75	4	368.847	6209.98	4	377.965	5620.7	4	351.072	5762.73	4	363.036	5936.15
370.702	5922.39	4	372.922	6081.69	4	382.017	5835.35	4	528.663	1658.08	1	388.422	5700.65	4	394.403	6076.34	4	412.003	6420.59	4	519.601	1630.82	1	355.983	5798.01	4	373.77	5990.5	4	383.72	5712.24	4	522.135	1509.72	1	358.86	5909.63	4	368.884	5524.83	4	378.025	5877.75	4	351.225	5836.86	4	363.197	5420.6
370.705	6028.35	4	373.008	5686.38	4	382.026	5925.29	4	528.765	1697.41	1	388.451	5748.75	4	394.697	5744.87	4	412.074	5727.92	4	519.621	1605.08	1	355.986	5723.58	4	373.811	5504.66	4	383.816	5804.48	4	522.138	1598.53	1	358.887	5803.77	4	368.91	6372.85	4	378.035	5769.93	4	351.235	5860.92	4	363.258	5846.48
370.717	5662.7	4	373.04	6105.81	4	382.042	5640.5	4	528.892	1581.08	1	388.764	5766.51	4	394.705	6115.62	4	412.075	5422.33	4	519.635	1748.63	1	356.012	5872.35	4	373.835	5562.25	4	383.926	5626.01	4	522.154	1710.93	1	359.003	6153.56	4	368.926	5963.33	4	378.043	5649.91	4	351.452	5596.88	4	363.273	5868.64
370.781	5749.54	4	373.063	6359.28	4	382.044	5473.05	4	528.97	1576.7	1	388.88	5606.3	4	394.725	5669.5	4	412.118	5945.46	4	519.652	1634.77	1	356.067	5976.45	4	373.964	6052.44	4	383.968	5795.51	4	522.158	1743.97	1	359.015	5821.2	4	368.958	5874.66	4	378.048	5689.16	4	351.484	5796.09	4	363.347	5514.6
370.793	5979.14	4	373.102	5843.02	4	382.046	5816.22	4	529.02	1710.22	1	389.025	5684.86	4	394.729	5528.37	4	412.225	5686.57	4	519.677	1604.17	1	356.144	5547.81	4	373.965	5564.47	4	384.039	5804.97	4	522.185	1635.83	1	359.03	5805.15	4	368.963	5504.36	4	378.068	5978.59	4	351.54	5594.35	4	363.35	5864.41
370.847	5457.27	4	373.153	5652.15	4	382.099	5848.07	4	529.027	1667.64	1	389.037	5532.4	4	394.769	5660.45	4	412.226	5796.73	4	519.71	1617.06	1	356.172	5728.26	4	373.992	6091.41	4	384.23	5632.94	4	522.216	1648.42	1	359.117	5826.95	4	369.003	6127.17	4	378.085	5988.22	4	351.552	5989.41	4	363.364	5795.28
370.864	5993.04	4	373.208	5817.38	4	382.112	5962.92	4	529.177	1640	1	389.04	6207.89	4	394.784	6035.15	4	412.23	5890.55	4	519.715	1664.5	1	356.248	5733.41	4	374.021	6113.75	4	384.253	5812.37	4	522.225	1583.66	1	359.26	5510.83	4	369.046	5984.02	4	378.087	5743.8	4	351.57	5690.64	4	363.454	5482.44
370.933	5601.78	4	373.268	5767.1	4	382.292	5611.94	4	529.204	1671.98	1	389.567	5762.99	4	394.791	5558.99	4	412.285	5918.85	4	519.812	1781.87	1	356.448	5694.98	4	374.034	6113.6	4	384.267	5882.51	4	522.23	1664.63	1	359.327	5737.51	4	369.113	5598.59	4	378.123	6265.03	4	351.571	5717.4	4	363.5	6080.19
370.945	5883.9	4	373.295	5716.11	4	382.318	6297.17	4	529.217	1753.89	1	389.712	5879.58	4	394.804	5746.84	4	412.321	5758.56	4	519.889	1774.83	1	356.452	5911.77	4	374.088	5977.56	4	384.286	5992.57	4	522.4	1701.6	1	359.334	5861.15	4	369.138	5940.27	4	378.138	5536.65	4	351.626	5741.92	4	363.524	6238.42
370.957	5883.41	4	373.405	5899.18	4	382.331	5978.67	4	529.239	1585.42	1	389.764	5977.97	4	395.048	5685.87	4	412.44	5549.95	4	519.9	1627.36	1	356.53	5766.16	4	374.103	5721.28	4	384.301	5742.78	4	522.425	1621.05	1	359.365	5661.09	4	369.193	6277.03	4	378.156	5985.54	4	351.675	5741.58	4	363.552	5751.94
371.149	5716.8	4	373.483	5722.29	4	382.372	5747.58	4	529.242	1684.11	1	389.793	6028.12	4	395.093	5535.12	4	412.655	5749.76	4	519.917	1625.93	1	356.569	5789.54	4	374.113	6061.83	4	384.321	5897.3	4	522.508	1584.72	1	359.381	5752.74	4	369.28	5816.48	4	378.164	6155.28	4	351.698	5586.05	4	363.629	5745.98
371.223	5775.94	4	373.484	6215.4	4	382.403	5734	4	529.302	1717.33	1	389.812	6161.58	4	395.258	5756.27	4	412.702	5785.65	4	519.964	1585.66	1	356.59	5776.93	4	374.203	5619.68	4	384.34	5831.72	4	522.584	1701.21	1	359.43	5867.06	4	369.297	5710.03	4	378.167	6046.31	4	351.736	5789.91	4	363.67	6099.43
371.288	5668.22	4	373.565	5537.89	4	382.453	5618.14	4	529.331	1776.78	1	389.846	4984.8	4	395.454	6107.36	4	412.744	5660.43	4	519.974	1742.16	1	356.648	5796.31	4	374.245	5983.62	4	384.455	5833.09	4	522.611	1641.86	1	359.5	6023.48	4	369.298	6169.82	4	378.257	6195.3	4	351.833	5668.89	4	363.697	5679.93
371.319	5813.25	4	373.61	5798.11	4	382.469	6029.55	4	529.336	1583.86	1	389.897	5493.55	4	395.485	5681.79	4	412.749	5632.27	4	520.061	1666.6	1	356.658	5833.98	4	374.274	6174.01	4	384.456	6145.87	4	522.624	1632.49	1	359.515	5843.12	4	369.33	6420.83	4	378.267	5687.02	4	351.848	5693.74	4	363.714	5925.78
371.344	6169.4	4	373.681	5709.63	4	382.489	5912.97	4	529.39	1658.61	1	389.923	5358.07	4	395.618	5638.03	4	412.768	5877.48	4	520.074	1829.36	1	356.704	5511.35	4	374.298	6018.47	4	384.46	5770.67	4	522.629	1670.27	1	359.543	6040.17	4	369.333	5897.37	4	378.292	6147.04	4	351.851	5800.18	4	363.743	5497.64
371.388	5668.98	4	373.723	5736.19	4	382.533	5996.6	4	529.462	1790.91	1	389.985	5865.51	4	395.636	5508.73	4	412.781	5857.82	4	520.198	1683.28	1	356.763	5819.89	4	374.298	5696.87	4	384.468	5682.92	4	522.638	1567.02	1	359.546	5757.33	4	369.348	5893.39	4	378.339	5823.85	4	351.892	6021.92	4	363.773	5878.86
371.419	5614.29	4	373.763	5722.66	4	382.539	5839.09	4	529.503	1791.03	1	390.077	5518.6	4	395.754	5741.52	4	412.788	5629.43	4	520.359	1491.31	1	356.777	5772.57	4	374.471	5544.19	4	384.484	5969.04	4	522.727	1681.81	1	359.551	5928.28	4	369.349	6126.58	4	378.363	5933.78	4	351.989	5741.78	4	363.78	6034.24
371.576	5752.05	4	373.788	5777.72	4	382.581	5914.1	4	529.666	1579.67	1	390.126	5404.83	4	395.772	5730.46	4	412.883	5415.28	4	520.361	1600.31	1	356.787	6084.27	4	374.475	5973.15	4	384.485	5594.58	4	522.748	1699.79	1	359.583	5845.32	4	369.365	5759.78	4	378.426	5868.46	4	352.021	5810.64	4	363.819	5859.37
371.616	5818.64	4	373.859	6035.77	4	382.59	5890.34	4	529.69	1528.74	1	390.13	5556.5	4	395.829	6016.67	4	412.982	5856.06	4	520.409	1655.49	1	356.845	5830.8	4	374.481	6042.77	4	384.569	5883.57	4	522.77	1647.13	1	359.738	5807.31	4	369.392	6113.13	4	378.496	5991.7	4	352.044	5645.11	4	363.889	5662.98
371.793	5790.86	4	373.867	5999.42	4	382.637	5722.59	4	529.736	1666.26	1	390.166	5715.77	4	395.844	5552.12	4	412.985	6013.23	4	520.436	1617.15	1	356.87	5644.63	4	374.521	5902.48	4	384.754	5770.57	4	522.771	1609.21	1	359.774	6214.23	4	369.433	6504.85	4	378.543	5935.2	4	352.06	6070.98	4	363.898	5939.78
371.812	5848.84	4	373.889	5675.82	4	382.669	5685.25	4	529.754	1666.23	1	390.172	5661.76	4	395.85	5542.57	4	413.111	5640.03	4	520.489	1615.29	1	356.893	5807.27	4	374.525	5852.28	4	384.822	5683.84	4	522.806	1603.03	1	359.832	5665.11	4	369.458	5863.48	4	378.617	5747.42	4	352.272	5696.75	4	363.91	5701.62
371.87	5563.98	4	373.923	5770.47	4	382.67	5739.46	4	529.819	1755.39	1	390.317	6086.08	4	395.86	5669.88	4	413.153	5830.87	4	520.528	1632.81	1	357.176	5721.18	4	374.555	5796.96	4	384.928	5727.13	4	522.873	1778.98	1	359.852	6113.67	4	369.504	5762.05	4	378.652	5762.64	4	352.339	6222.03	4	363.954	5894.3
371.915	5227.31	4	373.981	6086.28	4	382.719	5826.52	4	529.841	1572.22	1	390.318	5881.46	4	395.885	5920.53	4	413.22	6084.72	4	520.605	1659.86	1	357.208	5670.66	4	374.649	5841.99	4	384.964	6073.54	4	522.874	1650.89	1	359.877	6033.59	4	369.568	5797.05	4	378.763	5767.87	4	352.478	5700.76	4	363.957	6146.75
371.934	5767.41	4	374.025	5829.77	4	382.786	5824.99	4	529.849	1667.21	1	390.328	6017.47	4	395.939	5786.22	4	413.28	5777.28	4	520.637	1584.41	1	357.242	5859.42	4	374.679	5809	4	384.979	5870.49	4	522.924	1661.87	1	359.921	6011.94	4	369.713	5889.13	4	378.789	6214.13	4	352.478	5683.64	4	363.996	5694.36
371.943	5880.59	4	374.053	6395.81	4	382.804	5930.79	4	529.873	1584.84	1	390.458	6161.33	4	396.044	5864.39	4	413.464	5505.59	4	520.718	1728.49	1	357.245	6226.72	4	374.704	5678.6	4	384.993	5679.17	4	522.932	1791.76	1	359.971	6012.75	4	369.749	6045.77	4	378.809	5676.51	4	352.492	6073.5	4	364.062	5655.31
372.056	5500.59	4	374.092	5774.39	4	382.873	5929.28	4	529.907	1692.88	1	390.536	5688.8	4	396.07	5698.29	4	413.52	5693.12	4	520.726	1791.42	1	357.285	5809.49	4	374.782	5699.45	4	385.07	5827.03	4	523.023	1704.95	1	360.044	5819.79	4	369.755	5507.17	4	378.818	5712.39	4	352.512	5737.07	4	364.104	5658.31
372.063	5500.04	4	374.147	5738.44	4	382.897	5655.16	4	529.947	1677.24	1	390.559	6067.46	4	396.095	5787.76	4	413.548	5765.56	4	520.729	1732.27	1	357.329	5998.06	4	374.809	5751	4	385.077	5806.29	4	523.121	1741.46	1	360.044	5773.77	4	369.755	6362.39	4	378.818	5693.54	4	352.525	5657.38	4	364.134	6269.9
372.105	5780.09	4	374.238	5780.23	4	382.898	5962.32	4	529.96	1604.3	1	390.637	5792.94	4	396.166	5522	4	413.62	5944.61	4	520.74	1631.52	1	357.469	5948.28	4	374.826	5576.34	4	385.12	5883.07	4	523.121	1626.97	1	360.107	5999.28	4	369.782	5680.05	4	378.843	5844.15	4	352.586	6181.4	4	364.153	6305.95
372.228	5696.92	4	374.263	6207.03	4	382.941	5569.34	4	529.971	1685.19	1	390.654	5716.65	4	396.212	5540.23	4	413.715	5830.15	4	520.76	1647.69	1	357.493	6033.19	4	374.835	5877.96	4	385.13	5812.26	4	523.157	1645.78	1	360.142	5759.1	4	369.834	6086.49	4	378.855	5804.17	4	352.627	5897.02	4	364.41	5618.35
372.257	5702.89	4	374.352	5586.16	4	382.983	5606.01	4	529.977	1625.92	1	390.768	5770.84	4	396.273	5537.31	4	413.935	5923.85	4	520.773	1657.21	1	357.506	5530.92	4	374.837	5599.02	4	385.147	5991.83	4	523.277	1590.59	1	360.144	5772.09	4	369.927	6209.11	4	378.875	5679.12	4	352.633	5696.44	4	364.462	6310.92
372.288	5876.93	4	374.379	6100.22	4	382.995	5720.58	4	529.977	1655.88	1	390.794	6036.57	4	396.284	5541.91	4	414.152	5676.03	4	520.815	1773.42	1	357.512	5933.54	4	374.855	5859.88	4	385.17	5935.99	4	523.348	1645.03	1	360.148	5863.73	4	369.996	6102.85	4	378.905	5795.74	4	352.754	5890.51	4	364.563	6055.42
372.637	5737.3	4	374.384	6235.36	4	383.04	5524.29	4	529.991	1701.08	1	391.198	6256.17	4	396.388	5644.63	4	414.269	5763.8	4	520.855	1621.33	1	357.611	5750.51	4	374.934	6068.36	4	385.195	5913.67	4	523.424	1725.98	1	360.254	5673.38	4	370	5725.05	4	378.92	6398.36	4	352.795	5954.11	4	364.734	5713.85
372.652	5766.43	4	374.477	5755.27	4	383.053	5787.35	4	529.998	1637.13	1	391.243	5901.32	4	396.398	5652.16	4	414.332	5714.8	4	520.857	1539.39	1	357.642	5695.54	4	374.955	6083.96	4	385.241	5858.36	4	523.475	1651.97	1	360.307	5756.71	4	370.01	5881.34	4	378.953	5592.16	4	352.885	6346.99	4	364.752	5626.18
372.662	5677.32	4	374.501	5666.16	4	383.091	5718.18	4	530.161	1744	1	391.449	5491.9	4	396.45	5706.98	4	414.431	6000.31	4	520.896	1713.67	1	357.769	5968.96	4	374.977	5745.26	4	385.278	5510.68	4	523.517	1699.15	1	360.309	5671.64	4	370.04	5928.32	4	379.005	6004.16	4	352.941	5663.08	4	364.787	5460.98
372.724	6083.83	4	374.504	5746.92	4	383.218	6184.33	4	530.229	1661.36	1	391.533	5984.95	4	396.521	5860.97	4	414.507	5469.98	4	520.903	1677.62	1	357.773	5734.81	4	374.981	5947.38	4	385.315	5569.12	4	523.518	1671.23	1	360.309	5782.59	4	370.13	5753.6	4	379.016	6113.91	4	352.949	6060.45	4	364.792	6406
372.792	5951.05	4	374.524	5846.77	4	383.223	5894.45	4	530.235	1685.04	1	391.785	5815.76	4	396.53	5692.36	4	414.548	5838	4	520.907	1674.29	1	357.849	5886.39	4	375.093	5810.36	4	385.404	5596.94	4	523.562	1645.9	1	360.351	5994.77	4	370.162	6155.81	4	379.15	5967.46	4	352.973	5643.14	4	364.91	5733.58
372.855	5667.47	4	374.527	6432.93	4	383.328	5570.1	4	530.293	1579.16	1	391.804	6050.96	4	396.834	5652.26	4	414.56	5560.67	4	520.916	1598.9	1	357.926	5353.15	4	375.106	5875.63	4	385.404	5648.41	4	523.633	1634.52	1	360.394	6164.7	4	370.191	6351.45	4	379.151	6099.24	4	352.994	5760.65	4	364.979	6053.95
372.901	5587.23	4	374.536	5845.3	4	383.393	5972.89	4	530.343	1765.82	1	391.931	5789.79	4	396.923	6163.44	4	414.576	5783.37	4	520.932	1822.1	1	357.934	6039.72	4	375.115	5887.63	4	385.433	6127.24	4	523.637	1618.2	1	360.417	5989.05	4	370.232	5739.37	4	379.181	5644.76	4	353.017	5905.98	4	364.999	5723.1
372.905	5699.08	4	374.564	5658.09	4	383.466	6201.38	4	530.366	1609.16	1	391.945	5762.04	4	396.979	5628.11	4	414.585	5914.91	4	521.007	1587.55	1	358.003	6017.62	4	375.225	5966.88	4	385.433	6326.55	4	523.654	1579.17	1	360.424	5796.33	4	370.338	6397.09	4	379.264	5897.08	4	353.022	6030.92	4	365.015	5724.41
372.923	6135.26	4	374.638	6516.36	4	383.57	5877.16	4	530.452	1706.34	1	391.955	5626.22	4	397.124	5616.36	4	414.61	5804.44	4	521.079	1677.47	1	358.064	5791.05	4	375.236	5680.34	4	385.444	5676.17	4	523.657	1699.66	1	360.552	6261.49	4	370.455	5909.51	4	379.299	5941.23	4	353.131	5628.05	4	365.025	6124.27
372.975	5747.76	4	374.667	5677.37	4	383.582	5964.65	4	530.485	1622.28	1	391.969	5919.91	4	397.257	5916.61	4	414.731	5924.29	4	521.229	1632.43	1	358.069	6075.37	4	375.351	5520.4	4	385.454	5758.54	4	523.683	1636.15	1	360.622	5926.23	4	370.548	6089.48	4	379.307	5881.02	4	353.173	5858.41	4	365.09	6110.14
373.022	6020.39	4	374.713	5673.35	4	383.587	6180.58	4	530.512	1558.23	1	391.989	6225.15	4	397.283	5580.33	4	414.867	5637.12	4	521.248	1656.12	1	358.096	6164.52	4	375.454	5585.88	4	385.51	5717.38	4	523.69	1612.84	1	360.698	6090.27	4	370.55	6135.17	4	379.364	5854.82	4	353.195	5777.54	4	365.116	5415.94
373.113	5714.01	4	374.715	5865.79	4	383.627	5818.45	4	530.514	1632.26	1	392.178	5647.37	4	397.315	6256.47	4	414.873	5815.23	4	521.252	1657.32	1	358.183	5651.64	4	375.588	5560.08	4	385.526	5707.9	4	523.717	1730.3	1	360.832	5920.28	4	370.674	5755.23	4	379.432	5809.84	4	353.247	5493.63	4	365.13	5639.6
373.289	5931.67	4	374.739	5598.35	4	383.639	5878.53	4	530.519	1707.18	1	392.22	5895.06	4	397.356	5832.56	4	414.931	5574.19	4	521.267	1667.37	1	358.238	5831.99	4	375.595	6212.73	4	385.548	5701.33	4	523.746	1604.14	1	360.846	5763.17	4	370.692	5735.02	4	379.526	6431.95	4	353.299	5813.69	4	365.158	6058.09
373.3	5819.05	4	374.785	5947.84	4	383.658	5854.49	4	530.523	1634.69	1	392.259	5643.96	4	397.443	5481.76	4	414.98	5664.52	4	521.461	1570.48	1	358.242	5687.06	4	375.64	6357.94	4	385.556	6132.45	4	523.793	1596.09	1	360.874	5963.42	4	370.733	5684.43	4	379.548	6066.71	4	353.32	6358.61	4	365.205	5640.89
373.33	5683.59	4	374.805	5803.07	4	383.663	5768.87	4	530.535	1538.91	1	392.293	5625.84	4	397.483	5393.13	4	414.985	5846.39	4	521.465	1656.12	1	358.245	6049.75	4	375.645	5947.41	4	385.618	5865.88	4	523.794	1700.01	1	360.957	5984.97	4	370.895	5738.73	4	379.551	5451.61	4	353.558	5585.99	4	365.216	5864.86
373.427	5358.38	4	374.84	5903.28	4	383.687	5643	4	530.569	1646.95	1	392.47	6097.27	4	397.546	5608.29	4	415.067	5791.3	4	521.466	1580.24	1	358.295	5832.11	4	375.68	6329.03	4	385.624	5742.3	4	523.826	1759.71	1	360.96	5787.81	4	370.941	5527.05	4	379.573	5928.22	4	353.576	6073.74	4	365.307	5946.74
373.528	5742.15	4	374.896	5911.32	4	383.696	5688.74	4	530.58	1783.83	1	392.539	5616.24	4	397.566	5760.76	4	415.131	6117.92	4	521.58	1592.8	1	358.337	6044.8	4	375.682	5830.89	4	385.641	5758.91	4	523.879	1613.81	1	361.173	5776.79	4	370.968	5685.91	4	379.585	5603.44	4	353.769	5847.61	4	365.329	5646.33
373.535	5713.84	4	374.953	5683.67	4	383.697	5694.66	4	530.619	1745.4	1	392.662	5672.27	4	397.608	5703.79	4	415.189	5806.33	4	521.738	1603.48	1	358.378	6036.46	4	375.699	5660.81	4	385.728	5763.55	4	523.888	1701.67	1	361.189	5910.54	4	371.03	6252.84	4	379.598	5448.88	4	353.777	6089.39	4	365.389	5682.85
373.582	5607.26	4	374.97	5826.78	4	383.841	5768.9	4	530.641	1513.81	1	392.692	5796.33	4	397.61	5569.43	4	415.251	5749.5	4	521.864	1590.42	1	358.39	6033.4	4	375.707	5640.05	4	385.792	5833	4	523.89	1618.49	1	361.258	5807.51	4	371.095	5518.96	4	379.623	5648.02	4	353.8	5915.63	4	365.463	6072.95
373.602	6097.37	4	374.985	5963.5	4	383.882	6173.8	4	530.644	1638.32	1	392.726	5672.14	4	397.781	6045.53	4	415.259	5475.36	4	521.874	1740.13	1	358.484	5913.02	4	375.719	5654.27	4	385.828	5782.47	4	523.918	1692.5	1	361.301	5759.03	4	371.1	5959.09	4	379.714	5677.64	4	353.837	5857.81	4	365.473	5520.26
373.639	5476.79	4	374.988	5837.03	4	384.048	5936.87	4	530.699	1585.88	1	392.73	5854.1	4	397.844	5978.65	4	415.285	5703.01	4	521.895	1561.12	1	358.517	5847.34	4	375.719	5959.02	4	385.832	5700.92	4	523.922	1627.52	1	361.317	5912.01	4	371.162	5584.23	4	379.731	6157.46	4	353.874	6075.31	4	365.48	5682.43
373.667	5858.07	4	375.196	5720.2	4	384.086	5611.93	4	530.72	1663.48	1	392.742	5641.07	4	397.845	6028.35	4	415.423	5738.03	4	521.9	1563.27	1	358.581	5807.78	4	375.726	5794.66	4	385.879	5932.5	4	523.94	1673.33	1	361.324	6060.37	4	371.181	5546.25	4	379.814	6243.34	4	353.998	5814.87	4	365.563	5980.64
373.674	6296.54	4	375.198	5727.85	4	384.136	5725.34	4	530.726	1618.65	1	392.758	5650.41	4	397.916	5633.29	4	415.463	5564.36	4	521.923	1855.5	1	358.851	5858.28	4	375.977	5832.5	4	386.031	6130.13	4	523.954	1717.87	1	361.343	5590.24	4	371.246	5887.48	4	379.833	5572.62	4	354.017	5778.01	4	365.569	5871.16
373.795	5728.37	4	375.221	5741.31	4	384.152	5778.49	4	530.763	1727.98	1	392.822	5606.02	4	398.051	5456.26	4	415.661	5762.85	4	521.927	1695.78	1	358.959	5719.92	4	375.984	5645.87	4	386.036	5702.14	4	523.975	1585.9	1	361.366	5763.93	4	371.298	5755.59	4	379.989	5633.69	4	354.031	5508.43	4	365.643	5797.48
373.862	5816.92	4	375.276	5841.54	4	384.171	6166.86	4	530.775	1697.05	1	393.034	5328.1	4	398.095	6201.19	4	415.708	5718.32	4	521.935	1721.29	1	359.012	5671.27	4	376.002	5757.93	4	386.052	5851.93	4	524.018	1608.32	1	361.412	5827.35	4	371.323	6193.49	4	380.049	5658.16	4	354.094	5720.03	4	365.692	5936.76
373.915	5662.52	4	375.304	5643.85	4	384.183	5792.48	4	530.822	1737.97	1	393.123	5886.19	4	398.108	5888.79	4	415.708	5896.99	4	521.982	1599.81	1	359.019	5582.45	4	376.029	5763.27	4	386.071	5827.43	4	524.041	1770.14	1	361.471	5883.43	4	371.405	5613.99	4	380.053	5829.56	4	354.115	5632.75	4	365.717	5631.35
373.919	5620.14	4	375.358	5865.24	4	384.199	6210.86	4	530.827	1711.69	1	393.256	5721.95	4	398.122	6065.99	4	415.957	5741.61	4	522.013	1672.47	1	359.07	5871.85	4	376.092	6052.83	4	386.075	5772.66	4	524.065	1816.31	1	361.476	5887.41	4	371.436	5535.63	4	380.206	6030.16	4	354.152	6083.94	4	365.789	5736.98
374.017	6164.06	4	375.372	5793.47	4	384.25	5680.79	4	530.84	1630.65	1	393.344	6145.55	4	398.164	5709.13	4	416.081	5864.53	4	522.045	1628.42	1	359.119	6299.44	4	376.127	5651.7	4	386.161	5805.9	4	524.087	1660.9	1	361.529	5870.15	4	371.458	5789.93	4	380.27	5606.51	4	354.18	5818.7	4	365.924	6152.31
374.07	5883.6	4	375.438	6405.55	4	384.251	5588.6	4	530.852	1668.4	1	393.406	5713.05	4	398.224	5760.65	4	416.138	5614.57	4	522.051	1592.64	1	359.173	5747.83	4	376.132	6167.46	4	386.179	5599.09	4	524.112	1699.95	1	361.631	5721.89	4	371.495	5611.41	4	380.295	5815.97	4	354.195	5756.59	4	366.001	5629.33
374.125	5768.47	4	375.473	5521.69	4	384.315	6325.95	4	530.876	1637.32	1	393.432	6130.67	4	398.321	6121.22	4	416.231	5691.95	4	522.075	1627.01	1	359.178	5835.7	4	376.166	5663.29	4	386.23	6041.09	4	524.178	1603.84	1	361.751	5926.56	4	371.514	5624.13	4	380.345	6088.32	4	354.196	5808.99	4	366.036	5682.32
374.165	5678.96	4	375.62	6112.22	4	384.339	5740.55	4	530.881	1644.75	1	393.527	5895.86	4	398.323	5755.74	4	416.308	5984	4	522.087	1528.99	1	359.312	6471.93	4	376.211	6023.89	4	386.255	5469.54	4	524.178	1625.32	1	361.76	5702.13	4	371.523	5770.51	4	380.351	5645.91	4	354.207	6163.54	4	366.047	5352.27
374.27	5602.38	4	375.673	5919.55	4	384.352	5608.47	4	531.021	1554.2	1	393.587	5532.66	4	398.385	5832.58	4	416.461	5847.59	4	522.134	1670.79	1	359.417	6178.28	4	376.248	5662.89	4	386.399	6003.55	4	524.188	1538.12	1	361.804	5926.29	4	371.619	5909.46	4	380.375	5472.31	4	354.418	5797.87	4	366.076	5704.61
374.278	6232.99	4	375.69	5898.84	4	384.382	6175.67	4	531.099	1677.22	1	393.59	5810.43	4	398.45	5748.97	4	416.52	5813.05	4	522.141	1705.52	1	359.451	5714.19	4	376.32	5723.4	4	386.457	5971.03	4	524.203	1606.37	1	361.827	5589.04	4	371.624	5924.83	4	380.404	5592.53	4	354.436	5595.99	4	366.196	5597.81
374.28	5686.23	4	375.696	5608.47	4	384.458	5506.77	4	531.103	1661.99	1	393.615	6120.54	4	398.543	5627.76	4	416.589	5460.06	4	522.147	1620.56	1	359.457	6086.47	4	376.323	5986.18	4	386.497	5840.78	4	524.21	1637.67	1	361.925	5735.29	4	371.75	5975.17	4	380.476	6076.9	4	354.471	5770.86	4	366.2	5677.83
374.326	5705.46	4	375.795	5694.34	4	384.487	5599.61	4	531.126	1667.05	1	393.644	5923.31	4	398.617	5857.5	4	416.613	5831.7	4	522.213	1652.57	1	359.53	5907.57	4	376.326	5653.84	4	386.505	5849.53	4	524.26	1570.28	1	361.94	6028.18	4	371.777	6038.26	4	380.56	6240.33	4	354.475	5694.39	4	366.217	5815.09
374.361	6076.73	4	375.8	5826.94	4	384.52	5526.72	4	531.134	1676.18	1	393.745	5668.55	4	398.696	5713.52	4	416.732	5657.53	4	522.23	1627.97	1	359.588	5568.36	4	376.358	5877.38	4	386.517	5964.26	4	524.263	1650.16	1	362.036	5654.78	4	371.799	5750.79	4	380.582	6143.79	4	354.532	5743.71	4	366.23	6145.05
374.378	5835.12	4	375.829	6008.26	4	384.631	5743.53	4	531.193	1484.57	1	393.75	5891.83	4	398.725	5736.35	4	416.781	5655.15	4	522.23	1623.39	1	359.597	5813.65	4	376.383	5951.78	4	386.541	5722.45	4	524.284	1641.95	1	362.037	5768.07	4	371.913	6052.88	4	380.806	5575.76	4	354.562	6011.37	4	366.24	5808.2
374.569	6059.23	4	375.842	5507.15	4	384.636	5794.58	4	531.221	1726.35	1	393.814	5669.26	4	398.888	5856.4	4	416.869	5806.33	4	522.295	1582.98	1	359.608	5864.27	4	376.392	5680.62	4	386.62	6082.61	4	524.337	1553.94	1	362.047	5923.59	4	371.928	5684.66	4	380.847	5895.47	4	354.567	5629.82	4	366.297	6183.49
374.602	5896.93	4	375.89	5607.38	4	384.657	5792.53	4	531.231	1596.11	1	393.85	5596.76	4	398.965	5745.47	4	416.885	5398.88	4	522.303	1557.88	1	359.639	5974.02	4	376.514	5649.39	4	386.648	5667.82	4	524.342	1649.21	1	362.059	5838.55	4	371.974	6342.21	4	380.912	6184.43	4	354.576	5645.35	4	366.336	5364.51
374.659	5801.09	4	375.916	5868.42	4	384.69	5866.25	4	531.239	1485.16	1	393.909	5851.78	4	398.982	6179.65	4	417.067	6071.45	4	522.308	1567.8	1	359.665	5623.92	4	376.576	5701.57	4	386.652	5709.44	4	524.403	1681.76	1	362.132	6046.5	4	372.143	5650.47	4	380.949	5570.3	4	354.59	5723.88	4	366.388	5454.23
374.681	5807.85	4	375.965	6007.19	4	384.705	5666.92	4	531.274	1632.46	1	393.965	5926.65	4	399.045	5718.07	4	417.095	5792.17	4	522.327	1618.69	1	359.686	5744.44	4	376.596	5753.86	4	386.665	5691.26	4	524.444	1605.87	1	362.141	6058.21	4	372.168	6019.23	4	380.959	5752.71	4	354.617	5616.39	4	366.448	5691.07
374.689	5870.64	4	376.117	5572.82	4	384.716	5813.18	4	531.331	1620.76	1	394.028	5977.24	4	399.072	5786.43	4	417.227	5785.35	4	522.371	1585.77	1	359.732	5848.34	4	376.639	5634.83	4	386.704	6078.86	4	524.46	1634.89	1	362.206	6000.34	4	372.174	5734.87	4	380.967	5621.52	4	354.654	5883.6	4	366.46	5720.74
374.69	5899.8	4	376.123	5634.65	4	384.731	5778.94	4	531.384	1603.67	1	394.038	5964.19	4	399.078	5704.57	4	417.301	5862.82	4	522.414	1587.72	1	359.747	5872.2	4	376.654	5640.48	4	386.716	6029.6	4	524.518	1549.79	1	362.263	6111.53	4	372.202	5595.74	4	380.988	5622.54	4	354.655	5815.99	4	366.478	5442.2
374.692	6228.32	4	376.134	5644.25	4	384.802	5772.45	4	531.418	1627.61	1	394.211	6061.55	4	399.106	5808.64	4	417.326	5714.66	4	522.415	1717.21	1	359.8	5906.17	4	376.66	5985.97	4	386.743	5741.77	4	524.565	1677.21	1	362.269	5731.05	4	372.231	5713.44	4	381.034	5877.56	4	354.831	5711.48	4	366.497	5485.67
374.747	5759.36	4	376.146	5750.74	4	384.808	6313.88	4	531.432	1585	1	394.218	5819.82	4	399.134	5796.72	4	417.376	5934.7	4	522.421	1669.78	1	359.817	5817.1	4	376.671	5763.57	4	386.755	5502.22	4	524.576	1635.16	1	362.289	6065	4	372.278	6337.5	4	381.183	6015.26	4	354.852	6273.87	4	366.608	5591.25
374.84	5884.87	4	376.189	5697.69	4	384.826	5834.78	4	531.434	1653.55	1	394.251	5751.07	4	399.135	6082.82	4	417.453	5774.07	4	522.44	1630.04	1	359.837	5686.56	4	376.691	5585.71	4	386.827	5707.54	4	524.663	1659.71	1	362.291	6143.2	4	372.286	5841.04	4	381.321	5934.92	4	354.912	5794.4	4	366.701	5903.27
374.868	5660.81	4	376.283	5915.19	4	384.874	5895.69	4	531.456	1653.02	1	394.283	5610.35	4	399.221	5825.11	4	417.455	5760.56	4	522.508	1566.78	1	359.887	5723.59	4	376.926	5999.82	4	386.828	6148.23	4	524.712	1694.69	1	362.353	5669.02	4	372.305	6068.45	4	381.323	5813.66	4	355.035	5670.19	4	366.788	5745.03
374.916	5754.47	4	376.297	5611.98	4	384.94	5722	4	531.485	1554.28	1	394.295	5660.01	4	399.237	5881.22	4	417.576	5714.7	4	522.515	1633.02	1	360	6491.45	4	376.927	5716.68	4	386.839	5577.65	4	524.776	1738.48	1	362.461	5823.64	4	372.513	5475.53	4	381.331	5784.11	4	355.049	5563.1	4	366.814	5588.42
374.936	5654.43	4	376.31	5802.04	4	384.941	5726.41	4	531.489	1647.55	1	394.449	5615.56	4	399.303	5811.77	4	417.604	5605.88	4	522.517	1525.06	1	360.003	6100.23	4	376.948	5732.11	4	386.843	5732.39	4	524.795	1598.48	1	362.666	6023.25	4	372.547	6367.62	4	381.332	5776.34	4	355.084	5956.57	4	366.846	5807.25
374.992	5791.51	4	376.352	5785.11	4	384.953	5709.92	4	531.532	1627.53	1	394.505	6199.44	4	399.324	5729.72	4	417.631	5855.01	4	522.54	1696.34	1	360.075	6013.13	4	376.965	6329.11	4	386.888	5987.43	4	524.829	1627.4	1	362.674	5714.49	4	372.694	5968.21	4	381.333	5558.73	4	355.132	5790.93	4	366.904	5803.12
375.015	6178.17	4	376.369	5702.45	4	384.999	5845.47	4	531.572	1636.73	1	394.568	6106.57	4	399.568	5665.3	4	417.637	5546.7	4	522.547	1852.25	1	360.101	6135.9	4	376.979	6225.52	4	386.893	5689.58	4	524.845	1626.93	1	362.692	5742.44	4	372.748	5906.96	4	381.406	6430.1	4	355.139	6023.34	4	366.905	5788.88
375.038	5767.01	4	376.463	5835.56	4	385.028	5405.39	4	531.58	1613.37	1	394.652	5813.89	4	399.642	5731.95	4	417.676	5702.64	4	522.574	1685.98	1	360.11	5818.9	4	377.048	5805.76	4	386.908	5704.47	4	524.883	1633.01	1	362.786	6185.98	4	372.806	6334.3	4	381.498	5577.05	4	355.149	5838.69	4	366.94	5786.83
375.044	5869.34	4	376.558	5923.3	4	385.052	6103.61	4	531.59	1561.33	1	394.664	5931.87	4	399.659	5528.93	4	417.9	5613.07	4	522.699	1574.31	1	360.249	5684.85	4	377.182	5559.86	4	386.935	6026.77	4	524.921	1614.87	1	362.792	5827.68	4	372.853	5718.26	4	381.55	5572.07	4	355.171	6008.63	4	366.945	5735.36
375.052	5551.24	4	376.566	5645.02	4	385.128	5910.56	4	531.656	1689.58	1	394.931	5514.75	4	399.751	5630.12	4	417.917	5819.57	4	522.7	1604.53	1	360.263	5663.73	4	377.204	5649.15	4	386.936	5747.17	4	524.923	1687.01	1	362.827	5899.78	4	372.861	5723.28	4	381.573	5725.55	4	355.2	5871.36	4	366.971	5740.13
375.057	5724.21	4	376.569	5702.06	4	385.232	6210.43	4	531.667	1678.12	1	394.963	5732.09	4	399.752	5742.44	4	417.923	5904.99	4	522.704	1691.33	1	360.334	6218.85	4	377.206	5719.73	4	387	5694.17	4	525.019	1729.14	1	362.84	5824.83	4	372.89	6139.29	4	381.579	5956.24	4	355.291	5902.32	4	367.096	5783.83
375.209	5634.74	4	376.622	5802.3	4	385.302	5474.16	4	531.674	1778.49	1	395.022	5949.27	4	399.81	5534.75	4	418.036	5892.75	4	522.736	1579.14	1	360.349	5918.93	4	377.256	6034.19	4	387.02	5780.83	4	525.051	1740.31	1	362.843	5719.93	4	372.896	6085.36	4	381.596	5967.39	4	355.322	5714.74	4	367.184	5934.4
375.213	5723.55	4	376.656	5829.8	4	385.333	5915.71	4	531.738	1866.94	1	395.064	5625.17	4	399.875	5381.9	4	418.082	5430.62	4	522.747	1682.56	1	360.414	6173.71	4	377.345	5626.89	4	387.031	5921.99	4	525.073	1534.94	1	362.926	6000.07	4	372.911	5794.4	4	381.61	5903.6	4	355.336	5678.08	4	367.28	5905.99
375.301	5867.15	4	376.672	5722.6	4	385.355	5795.44	4	531.753	1644.08	1	395.071	5973.52	4	399.913	5765.57	4	418.108	5540.32	4	522.747	1625.28	1	360.515	6057.48	4	377.364	5963.47	4	387.136	5594.72	4	525.132	1679.16	1	362.941	5983.41	4	372.915	5780.64	4	381.622	5666.68	4	355.402	5863.18	4	367.299	5811.66
375.314	5599.98	4	376.877	5514.68	4	385.395	6241.12	4	531.797	1693.64	1	395.127	5993.44	4	399.923	5937.77	4	418.159	5634.99	4	522.772	1683.44	1	360.521	5477.64	4	377.364	5730.8	4	387.147	5806.39	4	525.177	1600.82	1	362.979	5466.94	4	372.944	5832.79	4	381.627	5656.78	4	355.434	5938.99	4	367.413	5741.97
375.381	5743.84	4	376.881	5698.64	4	385.484	5806.14	4	531.809	1652.45	1	395.153	5855.31	4	400.006	6330.57	4	418.236	5695.82	4	522.823	1574.18	1	360.602	5575.71	4	377.389	5628.04	4	387.151	5840.71	4	525.218	1591.63	1	363.044	5965.19	4	372.946	6256.06	4	381.64	5890.39	4	355.458	5935.12	4	367.44	5611.81
375.423	5663.34	4	376.888	5659.49	4	385.502	5792.84	4	531.848	1735.76	1	395.154	5999.81	4	400.079	5577.23	4	418.244	5883.7	4	522.874	1569.28	1	360.641	5556	4	377.616	5952.07	4	387.267	5595.59	4	525.237	1577.44	1	363.061	5788.13	4	372.956	6101.66	4	381.653	5713.28	4	355.565	5850.22	4	367.457	5732.39
375.446	5626.51	4	377.016	5682.55	4	385.546	5826.37	4	531.85	1598.02	1	395.218	6150.22	4	400.091	5556.87	4	418.253	5588.81	4	522.883	1596.35	1	360.653	6334.98	4	377.649	5854.6	4	387.293	6190.77	4	525.27	1646.53	1	363.062	5999.49	4	372.985	5739.88	4	381.661	5673.22	4	355.566	6113.77	4	367.571	5756.78
375.462	5857.68	4	377.137	6272.93	4	385.617	5920.12	4	531.879	1674.47	1	395.291	5737.84	4	400.168	5664.29	4	418.327	5530.35	4	522.908	1571.71	1	360.668	5878.43	4	377.747	5621.8	4	387.309	5914.46	4	525.285	1706.06	1	363.074	5593.74	4	373.007	5816.52	4	381.675	5605.53	4	355.596	5738.08	4	367.616	6081.42
375.624	6040.46	4	377.162	5711.45	4	385.673	5856.52	4	531.937	1804.19	1	395.355	5627.29	4	400.232	5706.2	4	418.382	5705.39	4	522.915	1560.97	1	360.673	5788.68	4	377.75	5653.79	4	387.362	5993.78	4	525.309	1781.7	1	363.298	5985.99	4	373.066	6321.43	4	381.676	5774.56	4	355.613	5896.89	4	367.761	5787.64
375.701	5990.06	4	377.174	6379.65	4	385.697	5803.15	4	531.95	1642.63	1	395.384	5667.81	4	400.265	5841.08	4	418.46	5677.27	4	523.052	1609	1	360.686	5707.06	4	377.76	5954.71	4	387.471	5836.19	4	525.401	1764.23	1	363.321	5807.61	4	373.14	5851.74	4	381.736	5925.32	4	355.671	5813.3	4	367.819	5582.41
375.745	5879.61	4	377.178	5681.86	4	385.709	5969.25	4	531.988	1891.8	1	395.392	5765.1	4	400.337	5932.28	4	418.466	5826.99	4	523.073	1693.57	1	360.761	5693.55	4	377.763	5660.38	4	387.504	5643.11	4	525.453	1619.7	1	363.323	5999.6	4	373.149	5676.74	4	381.741	5628.76	4	355.727	5651.14	4	367.873	5696.89
375.804	5849.15	4	377.199	5709.82	4	385.736	5927.1	4	531.995	1683.19	1	395.464	5554.79	4	400.375	6047.92	4	418.688	5740.11	4	523.142	1621.61	1	360.779	5709.19	4	377.765	5627.51	4	387.518	5822.54	4	525.46	1593.07	1	363.326	5888.46	4	373.216	5876.75	4	381.866	5678.71	4	355.735	5872.75	4	367.906	5744.4
375.841	5851.59	4	377.211	5559.82	4	385.738	5673.28	4	532.008	1664.37	1	395.568	5708.29	4	400.386	5722.46	4	418.789	5704.11	4	523.171	1714.78	1	360.786	5646.08	4	377.83	6043	4	387.523	5765.74	4	525.49	1671.09	1	363.386	5790.88	4	373.243	5770.18	4	381.879	5496.5	4	355.767	5899.46	4	367.923	5699.7
375.936	5924.69	4	377.23	5835.91	4	385.742	6377.06	4	532.08	1712.18	1	395.611	5778.36	4	400.54	6189.47	4	418.837	5742.94	4	523.171	1612.29	1	360.81	5626.74	4	377.87	6073.32	4	387.574	6174.8	4	525.49	1711.55	1	363.519	5953.29	4	373.304	5961.14	4	381.92	5950.8	4	355.77	5952.24	4	367.934	5922.22
375.939	5580.65	4	377.232	5960.98	4	385.758	5785.61	4	532.092	1647.47	1	395.695	5671.93	4	400.66	5615.11	4	418.893	5777.19	4	523.178	1671.48	1	360.838	6225.19	4	377.915	5824.7	4	387.62	5847.64	4	525.508	1604.98	1	363.549	5744.88	4	373.316	5866.67	4	381.924	5550.47	4	355.789	6006.69	4	368.073	5809.67
375.969	5784.35	4	377.235	5973.9	4	385.935	6212.12	4	532.147	1717.85	1	395.759	5714.53	4	400.68	5728.67	4	418.932	5609.02	4	523.182	1609.2	1	360.841	5949.37	4	377.925	6104.26	4	387.72	5547.87	4	525.508	1654.7	1	363.553	5651.72	4	373.327	5576.84	4	381.982	5718.29	4	355.82	5704.73	4	368.086	5676.7
375.984	5560.91	4	377.236	5555.69	4	385.947	5705.59	4	532.148	1893.03	1	395.771	5795.43	4	400.754	6079.43	4	418.979	5583.75	4	523.187	1652.46	1	360.854	5826.48	4	377.931	5599.65	4	387.729	5545.76	4	525.516	1589.11	1	363.581	5735.04	4	373.361	5879.15	4	382.032	5870.37	4	355.842	5739.98	4	368.114	5740.9
375.997	5946.66	4	377.306	5985.05	4	385.972	5812.03	4	532.172	1713.03	1	395.803	5735.58	4	400.854	5386.21	4	418.986	5538.64	4	523.273	1658.33	1	360.905	5551.34	4	378.014	6123.46	4	387.751	5729.48	4	525.53	1578.3	1	363.635	5681.27	4	373.437	5591.37	4	382.082	6032.47	4	355.87	5702.53	4	368.118	5852.02
376.073	5732.61	4	377.329	5675	4	386.038	5425.59	4	532.193	1564.73	1	395.874	5736.49	4	400.885	5926.13	4	419.001	5493.04	4	523.331	1573.49	1	360.918	5527.9	4	378.059	5999.25	4	387.754	5804.71	4	525.531	1686.94	1	363.641	5933.04	4	373.468	5765.4	4	382.117	5828.38	4	356.09	5998.42	4	368.16	5820.72
376.139	5845.46	4	377.426	6167.94	4	386.079	5815.55	4	532.198	1650.08	1	395.943	6049.47	4	400.951	5724.55	4	419.131	5820.09	4	523.407	1585.55	1	360.951	5747.18	4	378.065	5655.3	4	387.793	5743.28	4	525.534	1706.39	1	363.669	5998.78	4	373.492	5716.52	4	382.131	5639.71	4	356.104	5699.32	4	368.203	5511.61
376.146	5877.35	4	377.518	5756.53	4	386.115	5903.83	4	532.208	1740.34	1	395.955	5807.97	4	401.003	6280.34	4	419.153	5752.62	4	523.41	1661.31	1	361.027	5977.31	4	378.147	5684.08	4	387.819	6009.8	4	525.535	1595.05	1	363.721	5594.45	4	373.511	5732.59	4	382.146	5731.5	4	356.171	5649.96	4	368.282	5552.42
376.167	5406.29	4	377.596	5648.39	4	386.178	5945.28	4	532.222	1821.48	1	396.134	5796.79	4	401.006	5598.32	4	419.173	5739.18	4	523.417	1538.41	1	361.036	5605.13	4	378.207	6117.7	4	387.916	5744.37	4	525.562	1629.35	1	363.742	5751.31	4	373.515	5833.11	4	382.27	5712.55	4	356.219	5427.73	4	368.388	5662.73
376.28	6133.04	4	377.614	6130.34	4	386.182	5828.71	4	532.243	1701.08	1	396.394	5705.56	4	401.032	6301.6	4	419.177	5493.47	4	523.5	1636.1	1	361.06	5678.76	4	378.261	5782.49	4	387.943	5938.87	4	525.563	1633.46	1	363.754	5687.9	4	373.569	5862.01	4	382.372	5698.82	4	356.272	6100.2	4	368.413	5541.02
376.293	5611	4	377.617	6128.91	4	386.23	5904.01	4	532.3	1598.16	1	396.42	5745.24	4	401.068	5918.11	4	419.213	6126.87	4	523.501	1720.75	1	361.064	5770.42	4	378.342	5647.1	4	388.018	6023.42	4	525.6	1653.75	1	363.838	6160.35	4	373.578	6200.22	4	382.38	5745.78	4	356.287	5642.13	4	368.43	5837.3
376.365	5732.9	4	377.709	5434.64	4	386.241	5705.45	4	532.322	1587.1	1	396.494	5705.11	4	401.082	5761.76	4	419.225	5639.6	4	523.542	1618.4	1	361.167	6036.45	4	378.398	5806.73	4	388.029	5797.8	4	525.611	1528.23	1	363.857	6046.38	4	373.627	5765.49	4	382.39	5727.44	4	356.297	5754.36	4	368.443	6137.86
376.414	5709.66	4	377.829	5876.73	4	386.258	5803.06	4	532.355	1683.73	1	396.585	5652.76	4	401.214	5727.31	4	419.247	6278.6	4	523.548	1611.35	1	361.187	5786.66	4	378.43	5669.73	4	388.065	5998.15	4	525.623	1691.39	1	363.941	6349.31	4	373.736	5450.77	4	382.408	5741.99	4	356.426	5698.24	4	368.505	5752.09
376.491	5942.99	4	377.851	5689.18	4	386.276	5852.31	4	532.379	1547.82	1	396.619	5986.86	4	401.218	6208.11	4	419.281	6109	4	523.551	1572.91	1	361.303	6247.42	4	378.454	5600.71	4	388.084	5646.93	4	525.637	1504.47	1	363.954	5896.77	4	373.769	6095.19	4	382.411	5807.43	4	356.434	5809.77	4	368.507	5664.88
376.553	5742.91	4	377.921	5759.48	4	386.288	5842.13	4	532.388	1646.16	1	396.654	5992.52	4	401.239	5831.47	4	419.307	6043.35	4	523.578	1766.78	1	361.32	5634.91	4	378.486	5789.68	4	388.142	5907.29	4	525.643	1607.79	1	363.971	5853.87	4	373.772	5789.29	4	382.437	5899.56	4	356.435	5824.5	4	368.521	5618.14
376.566	5576.1	4	377.922	6304.68	4	386.298	5800.03	4	532.485	1700.04	1	396.749	5617.61	4	401.278	5521.03	4	419.343	5884.21	4	523.599	1665.17	1	361.422	5683.39	4	378.486	5696.15	4	388.156	5901.35	4	525.671	1632.91	1	363.981	5927.31	4	373.781	6184.31	4	382.471	5682.11	4	356.505	5874.69	4	368.55	5755.19
376.624	5800.1	4	377.986	5873.27	4	386.307	5635.73	4	532.502	1703.1	1	396.825	5791.07	4	401.3	5955.2	4	419.546	5675.06	4	523.639	1673.22	1	361.424	6024.91	4	378.497	5888	4	388.219	5726.58	4	525.734	1529.69	1	363.988	5850.89	4	373.955	6129	4	382.504	6110.58	4	356.581	5989.48	4	368.591	5863.09
376.754	5972.13	4	378.144	6143.63	4	386.308	5626.81	4	532.509	1847.27	1	396.912	5707.99	4	401.361	5814.23	4	419.567	5852.75	4	523.655	1610.89	1	361.472	6224.76	4	378.518	5588.98	4	388.238	6354.16	4	525.742	1691.98	1	364.003	5754.08	4	373.988	5740.41	4	382.614	5760.8	4	356.584	5596.28	4	368.677	5986.68
376.755	5611.55	4	378.151	5613.68	4	386.311	5655.83	4	532.621	1780.52	1	396.92	5794.46	4	401.455	5833.42	4	419.568	5934.49	4	523.656	1705.5	1	361.495	5949.84	4	378.533	5690.29	4	388.304	5638.9	4	525.763	1651.6	1	364.039	5709.48	4	374.043	6277.07	4	382.618	5811.25	4	356.625	5661.69	4	368.724	5696.42
376.799	5848.26	4	378.171	5776.17	4	386.351	5858.77	4	532.663	1568.36	1	396.933	5508.99	4	401.747	6211.07	4	419.572	5870.73	4	523.669	1684.75	1	361.538	5641.68	4	378.568	5709.15	4	388.304	5763.54	4	525.765	1634.64	1	364.104	5538.61	4	374.063	5783.72	4	382.67	5859.62	4	356.643	5727.79	4	368.796	6233.26
376.874	5640	4	378.217	5897.46	4	386.389	5751.61	4	532.678	1590.32	1	397.035	5482.06	4	401.807	5709.73	4	419.598	5683.18	4	523.676	1643.72	1	361.554	6133.9	4	378.582	5781.77	4	388.339	5968.66	4	525.807	1584.49	1	364.19	6360.38	4	374.076	5919	4	382.698	6276.61	4	356.742	5667.94	4	368.801	5790.53
376.923	5789.25	4	378.288	5856.59	4	386.41	5721.02	4	532.684	1538.06	1	397.19	6251.64	4	401.939	5583.11	4	419.712	5977.37	4	523.693	1694.6	1	361.601	6115.58	4	378.587	5829.01	4	388.356	5722.17	4	525.819	1817.42	1	364.212	5716.91	4	374.121	5845.3	4	382.707	5768.53	4	356.771	5680.31	4	368.803	5779.67
376.926	5813.29	4	378.309	6079.91	4	386.558	5776.31	4	532.695	1641.55	1	397.207	5949.69	4	401.963	5704.76	4	419.768	5716.81	4	523.725	1585.86	1	361.615	5796	4	378.602	5915.08	4	388.407	5598.71	4	525.854	1627.71	1	364.226	5981.9	4	374.128	5843.09	4	382.753	5710.46	4	356.836	5733.75	4	368.848	5499.24
377.026	5964.48	4	378.318	6137.44	4	386.566	5688.27	4	532.742	1650.5	1	397.472	5583.3	4	401.993	5982.03	4	419.799	5536.84	4	523.779	1564.1	1	361.634	5625.73	4	378.637	5752.85	4	388.505	5849.61	4	525.882	1641.26	1	364.344	6176.81	4	374.157	4640.67	4	382.756	5506.55	4	356.878	5795.81	4	368.897	5858.66
377.05	5626.34	4	378.365	5699.82	4	386.688	6035.17	4	532.815	1564.92	1	397.49	5949.47	4	402.011	5787.48	4	419.814	5888.4	4	523.817	1688.48	1	361.638	5945.97	4	378.786	5835.82	4	388.522	5820.87	4	525.883	1602.83	1	364.606	5730.05	4	374.336	6009.48	4	382.771	5796.77	4	356.904	5853.48	4	368.934	5679.08
377.101	5629.02	4	378.427	5610.46	4	386.728	5692.81	4	532.817	1688.69	1	397.493	6025.73	4	402.031	5753.12	4	419.917	5650.47	4	523.849	1751.9	1	361.682	6154.3	4	378.855	5899.25	4	388.538	5983.45	4	525.895	1615.8	1	364.61	6090.81	4	374.368	5654.96	4	382.78	5729.5	4	356.909	5870.77	4	368.966	5998.7
377.318	5748.6	4	378.482	5809.89	4	386.764	5872.64	4	532.829	1651.4	1	397.545	5544.4	4	402.058	5660.47	4	419.958	5624.46	4	523.859	1640.19	1	361.692	5807.24	4	378.926	5982.69	4	388.551	5742.02	4	525.914	1675.89	1	364.666	5697.7	4	374.397	6239.25	4	382.847	5744.6	4	356.957	5676.66	4	368.977	5696.19
377.403	5439.11	4	378.49	5746.68	4	386.773	5691.36	4	532.852	1632.91	1	397.602	5733.91	4	402.193	5532.4	4	420.424	5923.49	4	523.862	1547.15	1	361.738	5779.68	4	378.949	5989.04	4	388.61	5725.06	4	525.922	1603.28	1	364.68	5889.51	4	374.416	6366.04	4	382.903	5756.75	4	356.974	5836.3	4	369.038	5604.37
377.461	5843.8	4	378.499	6000.27	4	386.807	5875.6	4	532.854	1714.75	1	397.608	5455.29	4	402.251	6284.53	4	420.436	5582.36	4	523.874	1676.36	1	361.874	5755.75	4	378.966	5961.03	4	388.638	6006.41	4	525.938	1540.98	1	364.681	5814.93	4	374.435	5761.18	4	382.913	6011.75	4	356.989	5993.5	4	369.052	5723.17
377.52	5754.74	4	378.52	6331.16	4	386.827	6286.11	4	532.878	1682.66	1	397.707	5884.64	4	402.329	5654.98	4	420.439	6266.59	4	523.913	1752.59	1	361.876	5704.71	4	379.135	5928.22	4	388.666	5610.51	4	525.968	1675.81	1	364.733	5678.1	4	374.468	5746.26	4	383.018	5741.89	4	356.991	5775.83	4	369.06	5531.17
377.556	5901.55	4	378.572	5792.47	4	386.831	5632.54	4	532.913	1626.98	1	397.759	5371.4	4	402.341	5576.19	4	420.59	5756.27	4	523.918	1658.61	1	361.889	5725.34	4	379.137	5674.64	4	388.697	5754.37	4	526.05	1666.66	1	364.736	5663.33	4	374.499	6216	4	383.054	5914.41	4	356.994	5769.65	4	369.077	6022.03
377.567	5484.25	4	378.601	5985.77	4	386.934	5916.54	4	532.957	1718.67	1	397.87	5739.89	4	402.352	5743.39	4	420.602	5799.85	4	523.979	1650.75	1	361.895	6005.46	4	379.209	5791.47	4	388.786	5530.03	4	526.09	1724.76	1	364.832	5881.45	4	374.507	5802.25	4	383.059	5845.25	4	357.018	5781.77	4	369.115	5474.2
377.578	5895.39	4	378.648	5898.47	4	386.953	6187.12	4	532.961	1744.47	1	397.917	5967.11	4	402.442	5824.55	4	420.66	5661.27	4	524.011	1688.19	1	361.917	5704.23	4	379.29	5794.83	4	388.851	5557.51	4	526.108	1690.56	1	364.908	5853.57	4	374.542	5891.61	4	383.127	5694.09	4	357.066	6062.8	4	369.154	5964.68
377.689	5629.3	4	378.673	5641.17	4	386.962	5743.94	4	532.978	1559.01	1	397.937	6068.9	4	402.458	5838.89	4	421.118	5572.47	4	524.027	1751.66	1	361.987	5747.99	4	379.346	5704.91	4	388.956	5683.2	4	526.119	1612.34	1	364.943	5735.34	4	374.547	6146.85	4	383.17	5871.97	4	357.098	5915.25	4	369.241	5308.33
377.721	5693.18	4	378.703	5701.65	4	386.984	5607.87	4	533.004	1737.91	1	397.94	5614.33	4	402.476	5669.95	4	421.168	5769.82	4	524.145	1743.36	1	362.063	6296.55	4	379.351	5724.58	4	389.008	5758.28	4	526.172	1729.65	1	364.965	5656.79	4	374.596	5619.68	4	383.372	5808.98	4	357.122	5710.19	4	369.253	5471.07
377.747	5729.2	4	378.73	5713.23	4	387.152	5776.11	4	533.036	1558.35	1	397.963	5638.92	4	402.527	5765.93	4	421.203	5470.37	4	524.181	1645	1	362.155	6100.26	4	379.367	5856.74	4	389.064	5912.44	4	526.192	1533.02	1	364.992	5405.99	4	374.728	5995.18	4	383.434	5678.06	4	357.146	6100.66	4	369.291	5466.71
377.787	6174.09	4	378.75	6201.56	4	387.161	6239.49	4	533.103	1621.55	1	397.982	5454.66	4	402.538	5906.9	4	421.22	5672.23	4	524.196	1623.76	1	362.174	5760.84	4	379.38	5632.89	4	389.127	5667.75	4	526.207	1613.99	1	365.003	5853.52	4	374.811	5705.95	4	383.513	6108.7	4	357.208	6100.06	4	369.303	5837.85
377.904	5383.87	4	378.821	5722.71	4	387.184	5839.81	4	533.109	1589.73	1	398.048	5633.96	4	402.618	5542.18	4	421.225	5996.74	4	524.219	1732.39	1	362.199	5885.75	4	379.406	5651.93	4	389.177	5649.1	4	526.241	1510.83	1	365.022	5819.97	4	374.85	5678.08	4	383.54	5912.65	4	357.298	5821.75	4	369.308	6011.34
377.974	5631.15	4	378.833	5566.18	4	387.214	6224.84	4	533.174	1586.02	1	398.187	5939.79	4	402.95	5648.24	4	421.322	5646.57	4	524.221	1553.16	1	362.218	5609.23	4	379.444	5682.33	4	389.233	6215.2	4	526.275	1638.13	1	365.028	6051.64	4	374.922	5494.39	4	383.543	5733.71	4	357.368	5783.65	4	369.376	5631.87
378.011	5732.78	4	378.836	6211.9	4	387.242	5689.64	4	533.211	1692.51	1	398.277	5793.38	4	402.98	5728.96	4	421.539	5784.22	4	524.227	1606.66	1	362.248	5998.05	4	379.444	5990.73	4	389.249	5791.32	4	526.301	1564.48	1	365.043	6236.64	4	374.974	5801.38	4	383.554	5816.45	4	357.394	5725.05	4	369.446	6040.65
378.076	5958.19	4	378.916	5703.54	4	387.38	6193.27	4	533.265	1685.16	1	398.316	5744.35	4	403.034	5909.36	4	421.645	5653.02	4	524.229	1711.27	1	362.374	5310.66	4	379.534	5625.07	4	389.253	5683.26	4	526.311	1804.92	1	365.072	5767.13	4	375.007	5754.69	4	383.561	6000.46	4	357.456	6002.02	4	369.508	6009.38
378.128	5871.12	4	378.939	5688.37	4	387.398	5504.95	4	533.285	1695.96	1	398.617	5854.4	4	403.041	5642.32	4	421.697	5743.56	4	524.233	1610.66	1	362.405	5998.91	4	379.572	6058.78	4	389.269	5858.41	4	526.357	1632.17	1	365.078	6016.76	4	375.06	5986.95	4	383.57	5918.29	4	357.523	5708.13	4	369.563	6122.63
378.129	5573.21	4	378.941	5612.33	4	387.409	5616.56	4	533.297	1728.99	1	398.622	5724.43	4	403.069	5884.28	4	421.775	5680.66	4	524.288	1697.65	1	362.441	5590.56	4	379.577	6047.29	4	389.393	5726.24	4	526.36	1734.31	1	365.161	5623.87	4	375.276	5733.74	4	383.747	5516.19	4	357.633	5688.87	4	369.65	5533.47
378.159	6154.7	4	378.994	6030.15	4	387.506	5607.56	4	533.301	1601.45	1	398.79	5838.29	4	403.146	5669.36	4	421.825	5738.37	4	524.298	1579.77	1	362.542	5678.69	4	379.596	5525.39	4	389.455	5675.49	4	526.385	1609.69	1	365.169	5741.01	4	375.326	5828.12	4	383.802	5760.71	4	357.671	5885.91	4	369.694	6071.91
378.204	5934.99	4	379.011	6179.32	4	387.528	5723.04	4	533.306	1586.89	1	398.882	5823.27	4	403.283	5732.36	4	421.852	5709.7	4	524.352	1668.06	1	362.589	5952.79	4	379.62	5755.73	4	389.456	5811.16	4	526.461	1688.93	1	365.22	6041.41	4	375.33	5735.34	4	383.823	5708.6	4	357.699	5828.38	4	369.702	5840.02
378.294	5867.74	4	379.018	6027.24	4	387.547	5677.79	4	533.317	1614.01	1	398.898	6003.77	4	403.414	6260.54	4	421.874	5663.47	4	524.353	1689.16	1	362.628	6098.72	4	379.622	5714.08	4	389.561	5967.94	4	526.528	1564.73	1	365.261	5844.96	4	375.385	5875.26	4	383.824	5801.62	4	357.711	6320.66	4	369.723	6017.23
378.316	5769.19	4	379.039	5932.1	4	387.616	5659.46	4	533.33	1590.55	1	398.901	5601.61	4	403.58	5942.18	4	421.99	5857.12	4	524.36	1551.49	1	362.628	6207.73	4	379.649	5833.18	4	389.685	5631.74	4	526.635	1670.43	1	365.262	5744.74	4	375.402	5828.88	4	383.936	5799.01	4	357.711	5853.35	4	369.73	5762.67
378.336	5749.16	4	379.086	5775.51	4	387.769	5706.55	4	533.423	1740.88	1	398.961	5885.43	4	403.609	5720.44	4	422.089	5867.9	4	524.403	1706.11	1	362.658	5862.59	4	379.74	6133.4	4	389.74	5843.75	4	526.685	1649.76	1	365.265	5816.23	4	375.427	6132.14	4	383.945	5819.8	4	357.723	5517.83	4	369.877	5830.93
378.389	5571.26	4	379.138	6090.17	4	387.817	6118.9	4	533.425	1655.17	1	398.967	5692.87	4	403.66	5699.1	4	422.275	5880.82	4	524.405	1641.37	1	362.759	5829.38	4	379.962	5862.07	4	389.777	5797.05	4	526.696	1707.66	1	365.325	5679.15	4	375.441	6279.15	4	383.965	5627.66	4	357.821	5713.48	4	369.901	5684.12
378.419	5683.33	4	379.146	5777.88	4	387.873	5795.88	4	533.431	1643.69	1	399.005	5735.22	4	403.672	5872.13	4	422.288	5687.77	4	524.421	1687.93	1	362.836	6321.41	4	380.066	5649.71	4	389.827	5619.3	4	526.696	1693.55	1	365.332	5940.36	4	375.528	5837.34	4	383.991	5548.61	4	357.858	5794.87	4	369.961	6050.85
378.44	5547.67	4	379.162	5594.23	4	387.883	5811.36	4	533.48	1572.35	1	399.036	5540.33	4	403.695	5783.96	4	422.309	5640.47	4	524.457	1631.76	1	363.099	5957.47	4	380.085	5977.12	4	389.888	5662.71	4	526.734	1575.64	1	365.349	5767.83	4	375.697	5998.96	4	383.993	5653.59	4	357.997	5689.8	4	369.975	5931.44
378.61	5701.49	4	379.179	5716.55	4	387.896	6297.45	4	533.492	1581.31	1	399.062	5990.54	4	403.768	6058.6	4	422.421	5712.95	4	524.589	1599.98	1	363.128	6082.63	4	380.309	5740.62	4	389.931	5619.26	4	526.791	1571.55	1	365.354	6003.55	4	375.758	5878.84	4	384.003	5823.41	4	358.022	6057.38	4	369.998	5669
378.631	6068.22	4	379.227	5981.86	4	387.918	5700.14	4	533.506	1573.33	1	399.092	6283.34	4	403.79	5851.08	4	422.463	5670.17	4	524.592	1653.92	1	363.134	5794.58	4	380.336	5563.54	4	390.016	5826.19	4	526.801	1656.8	1	365.355	5850.66	4	375.785	6367.2	4	384.081	5856.94	4	358.114	5738.19	4	370.017	5702.38
378.654	5623.16	4	379.236	5969.76	4	387.94	6228.08	4	533.659	1612.51	1	399.097	5995.9	4	403.795	5491.73	4	422.479	5668.86	4	524.635	1647.57	1	363.159	5661.07	4	380.359	5600.66	4	390.019	6031.65	4	526.809	1768.76	1	365.374	5672.11	4	375.798	6090.66	4	384.107	6356.01	4	358.119	5595.43	4	370.076	5612.56
378.737	6165.2	4	379.264	5732.73	4	387.994	5686.08	4	533.664	1618.83	1	399.223	6182.91	4	403.857	5553.9	4	422.501	5716.3	4	524.635	1676.74	1	363.205	5600.72	4	380.364	5591.89	4	390.034	5787.63	4	526.861	1821.9	1	365.374	5699.84	4	375.799	5661.21	4	384.113	5801.07	4	358.139	6301.05	4	370.099	6212.49
378.745	6042.11	4	379.317	5890.17	4	387.997	5749.6	4	533.682	1581.6	1	399.322	5753.45	4	403.904	5612.73	4	422.543	5647.79	4	524.665	1648.03	1	363.22	5736.82	4	380.443	5780.37	4	390.06	5803.84	4	526.89	1798.74	1	365.396	5713.93	4	375.878	5824.6	4	384.125	5717.24	4	358.145	5889.58	4	370.13	5997
378.782	6255.41	4	379.341	5468.76	4	388.049	5750.9	4	533.702	1581.74	1	399.331	5727.26	4	403.913	5534.24	4	422.619	5527.36	4	524.733	1631.19	1	363.232	5789.79	4	380.456	5950.64	4	390.104	5549.49	4	526.931	1664.71	1	365.502	5913.29	4	375.902	6120.72	4	384.195	5929.18	4	358.192	5880.53	4	370.171	5662.87
378.881	5453.39	4	379.35	5557.8	4	388.132	5596.23	4	533.727	1579.16	1	399.346	5726.24	4	403.916	5642.51	4	422.641	5670.06	4	524.74	1648	1	363.308	6049.03	4	380.545	5767.78	4	390.146	5912.48	4	526.976	1679.56	1	365.524	6461.69	4	375.908	5911.58	4	384.238	5832.4	4	358.332	5987.86	4	370.175	6151.65
379.017	5548.26	4	379.384	6131.62	4	388.159	5430.75	4	533.749	1549.71	1	399.462	6058.12	4	403.952	6214.05	4	422.725	5731.63	4	524.749	1659.94	1	363.442	5788.25	4	380.589	5797.68	4	390.189	5701.11	4	527.03	1627.5	1	365.526	6043.25	4	375.968	5820.15	4	384.27	5980.22	4	358.373	6034.62	4	370.27	5674.03
379.087	6048.71	4	379.419	5745.37	4	388.275	5791.42	4	533.749	1650.65	1	399.598	5694.15	4	403.968	5572.06	4	422.749	5907.86	4	524.751	1635.17	1	363.525	6011.28	4	380.607	5718.93	4	390.218	6118.25	4	527.034	1747.9	1	365.53	5721.92	4	375.973	5635.34	4	384.282	5826.41	4	358.42	5785.15	4	370.274	5596.47
379.131	5742.8	4	379.421	5628.3	4	388.288	5806.01	4	533.754	1562.07	1	399.646	5713.68	4	404	5792.17	4	422.809	5679.71	4	524.808	1571.32	1	363.554	5667.07	4	380.665	5949.31	4	390.224	5726.1	4	527.129	1653.55	1	365.556	6174.9	4	376.032	5856.14	4	384.309	6065.89	4	358.477	5482.52	4	370.302	5766.97
379.146	5566.22	4	379.437	5779.42	4	388.394	5613.45	4	533.759	1639.4	1	399.648	5809.97	4	404.006	6086.44	4	422.857	5575.37	4	524.809	1718.08	1	363.558	5917.73	4	380.757	5701.51	4	390.274	6010.87	4	527.176	1567.03	1	365.589	5890.03	4	376.132	5899.81	4	384.323	5933.17	4	358.481	5685.15	4	370.336	5908.31
379.152	5781.25	4	379.467	5674.53	4	388.4	6012.21	4	533.896	1473.43	1	399.877	5843.05	4	404.03	5660.99	4	422.895	5658.84	4	524.826	1605.63	1	363.57	5873.72	4	380.789	5861.3	4	390.294	5529.19	4	527.195	1730.41	1	365.616	6122.86	4	376.149	5868.82	4	384.339	5733.13	4	358.51	5571.53	4	370.359	5768.34
379.179	5515.79	4	379.489	5655.09	4	388.451	5960.01	4	533.978	1647.36	1	399.907	5851.09	4	404.118	5453.94	4	422.896	5802.25	4	524.88	1639.16	1	363.572	6013.35	4	380.866	5879.86	4	390.329	5924.65	4	527.22	1570.14	1	365.626	5684.08	4	376.194	5848.06	4	384.345	5741.32	4	358.512	6039.48	4	370.379	5628.3
379.191	5632.64	4	379.566	6408.73	4	388.468	6002.19	4	533.978	1682.39	1	399.919	5757.97	4	404.148	5890.47	4	422.901	5769.79	4	525.086	1701.34	1	363.591	6006.95	4	380.872	5974.42	4	390.343	5916.3	4	527.241	1681.03	1	365.696	5756.51	4	376.223	5942.97	4	384.386	5668.7	4	358.528	5826.89	4	370.387	5972.4
379.303	6135.13	4	379.687	5514.26	4	388.471	5803.11	4	534.008	1733.5	1	399.924	5710.52	4	404.203	5658.46	4	422.964	5846.77	4	525.092	1694.69	1	363.62	5823.43	4	380.891	5760.52	4	390.355	5441.55	4	527.268	1640.45	1	365.715	6163.68	4	376.257	6089.74	4	384.407	5705.81	4	358.551	5858.01	4	370.39	5577.58
379.395	5648.18	4	379.709	5844.86	4	388.482	5552.17	4	534.039	1682.37	1	399.93	5548.45	4	404.205	6159.25	4	422.987	5699	4	525.131	1537.02	1	363.646	5954.44	4	380.891	5784.88	4	390.362	5898.5	4	527.305	1681.32	1	365.769	5420.79	4	376.276	5603.21	4	384.408	6124.56	4	358.561	5660.06	4	370.39	5811.55
379.54	5626.95	4	379.751	5840.79	4	388.516	5840.1	4	534.046	1596.7	1	399.967	5919.09	4	404.283	5697.78	4	423.066	5980.16	4	525.174	1701.44	1	363.803	5946.57	4	381.009	6183.16	4	390.371	5822.78	4	527.313	1578.91	1	365.804	5607.34	4	376.314	5551.82	4	384.413	5811.85	4	358.587	5760.6	4	370.446	5495.44
379.575	6221.86	4	379.761	6120.09	4	388.561	6110.65	4	534.072	1645.76	1	400.049	5714.5	4	404.291	5928.48	4	423.279	5731.83	4	525.223	1699.8	1	363.965	5750.3	4	381.045	5965.68	4	390.371	5939.72	4	527.38	1609.18	1	365.827	5822.84	4	376.359	5824.52	4	384.418	5932.58	4	358.612	5828.5	4	370.447	5692
379.603	5848.3	4	379.833	5547.46	4	388.578	5553.71	4	534.074	1505.72	1	400.062	5532.11	4	404.393	5864.48	4	423.379	5875.9	4	525.224	1768.97	1	364.071	5567.13	4	381.084	5748.98	4	390.49	6117.72	4	527.403	1662.55	1	365.869	5662.91	4	376.411	5731.63	4	384.429	5837.73	4	358.62	5555.44	4	370.469	5654.97
379.643	5781.3	4	379.893	5843.34	4	388.613	6261.19	4	534.082	1612.76	1	400.37	5645.95	4	404.533	5558.46	4	423.391	6064.46	4	525.271	1599.49	1	364.074	5737.12	4	381.134	5603.7	4	390.561	5954.98	4	527.411	1669.72	1	365.91	5707.33	4	376.448	5743.6	4	384.446	5915.78	4	358.781	5920.84	4	370.538	5825.36
379.653	5939.84	4	379.899	5645.99	4	388.634	5729.03	4	534.09	1605.9	1	400.439	5669.41	4	404.72	5613.65	4	423.436	6049.86	4	525.286	1624.6	1	364.179	5797.25	4	381.137	6039.57	4	390.592	6079.19	4	527.419	1620.71	1	365.915	5671.31	4	376.544	5693.77	4	384.451	5766.94	4	358.799	5763.44	4	370.543	5678.83
379.687	5799.22	4	379.959	5594.24	4	388.706	5815.39	4	534.107	1614.58	1	400.446	5700.52	4	404.761	5925.03	4	423.456	5671.57	4	525.288	1657.95	1	364.42	5750.69	4	381.169	5800.64	4	390.605	6356.11	4	527.443	1736.35	1	365.922	5808.47	4	376.55	5763.45	4	384.454	5671.92	4	358.812	6055.93	4	370.556	6004.12
379.699	5579.94	4	379.962	5812.39	4	388.771	6055.22	4	534.175	1700.49	1	400.534	5832.74	4	404.762	5612.69	4	423.484	5589.33	4	525.314	1669.77	1	364.441	5873.55	4	381.206	5785.32	4	390.606	5734.85	4	527.443	1503.02	1	365.941	5709.29	4	376.589	6052.17	4	384.568	5606.39	4	358.855	6122.21	4	370.633	5726.45
379.725	5967.45	4	380.012	5954.5	4	388.826	5501.36	4	534.199	1656.59	1	400.559	5501.77	4	404.764	5603.56	4	423.594	5646.75	4	525.316	1613.21	1	364.489	5684.19	4	381.283	5660.2	4	390.681	5917.7	4	527.488	1612.76	1	366.137	5658.76	4	376.605	5874.71	4	384.585	5992.23	4	358.906	5983.55	4	370.685	5641.85
379.747	7051.52	4	380.023	6111.21	4	388.843	5349.28	4	534.253	1681.65	1	400.587	5903.98	4	404.773	5836.35	4	423.612	5643.89	4	525.404	1738.59	1	364.518	5680.92	4	381.33	6035.61	4	390.702	5885.94	4	527.489	1639.46	1	366.138	5765.65	4	376.62	5942.46	4	384.644	5959.53	4	358.917	5644.14	4	370.729	5598.01
379.793	6147.32	4	380.027	5583.63	4	388.866	5621.09	4	534.257	1521.52	1	400.826	5685.18	4	404.794	5778.44	4	423.8	5635.78	4	525.423	1641.93	1	364.519	6116.47	4	381.346	5941.38	4	390.731	5987.05	4	527.551	1587.11	1	366.144	5839.09	4	376.637	5567.9	4	384.669	5768.56	4	358.988	5746.06	4	370.868	5971.86
379.836	5586.26	4	380.05	6031.89	4	389.004	5678.29	4	534.263	1675.09	1	400.864	5859.59	4	404.939	5562.09	4	423.889	5468.7	4	525.428	1697.99	1	364.586	5875.6	4	381.348	5689.35	4	390.774	6164.54	4	527.571	1589.65	1	366.169	5762.46	4	376.753	5974.99	4	384.673	5733.93	4	359.048	5793.57	4	370.886	5602.4
379.88	5630.32	4	380.106	5593.45	4	389.081	5996.32	4	534.267	1760.04	1	401.087	5749.96	4	404.946	5660.31	4	424.038	6141.04	4	525.429	1814.28	1	364.6	5721.79	4	381.385	5554.89	4	390.779	5653.65	4	527.582	1596.77	1	366.19	5828.88	4	376.755	5903.46	4	384.688	6162.8	4	359.162	5888.21	4	370.896	5839.84
379.882	6025.76	4	380.283	6038.03	4	389.129	5802.45	4	534.327	1640.03	1	401.267	5524.01	4	405.075	5834.93	4	424.149	5869.31	4	525.452	1614.27	1	364.633	5854.59	4	381.385	5649.02	4	390.822	5841.23	4	527.586	1615.99	1	366.275	5930.49	4	376.757	5639.03	4	384.73	5849.31	4	359.166	6093.36	4	370.918	5683.42
379.94	5758.78	4	380.29	6351.07	4	389.208	5726.94	4	534.359	1688.81	1	401.285	5830.3	4	405.138	5563.49	4	424.15	5484.35	4	525.502	1728.21	1	364.702	5571.6	4	381.459	5816.58	4	390.858	5735.06	4	527.63	1659.74	1	366.314	5594.38	4	376.792	5478.75	4	384.742	5835.31	4	359.222	5864.78	4	370.921	6142.74
379.962	6025.24	4	380.29	5994.98	4	389.227	5547.71	4	534.491	1725.11	1	401.294	5652.39	4	405.19	5910.26	4	424.277	5699.3	4	525.513	1641.67	1	364.735	6092.95	4	381.471	6051.42	4	391.015	6120.49	4	527.697	1645.24	1	366.323	5883.83	4	376.825	5630.16	4	384.747	5544.36	4	359.307	6122.52	4	370.931	5682.07
379.97	6178.92	4	380.291	5685.11	4	389.246	5839.78	4	534.505	1674.24	1	401.307	5599.72	4	405.212	5810.61	4	424.419	5724.14	4	525.516	1525.67	1	364.769	5732.51	4	381.579	5556.82	4	391.034	5885.24	4	527.726	1743.24	1	366.37	5730.19	4	376.948	5748.87	4	384.752	5680.15	4	359.451	5620.57	4	370.968	5508.53
379.981	5659.57	4	380.378	5615.21	4	389.274	5601.87	4	534.521	1689.17	1	401.38	5765.88	4	405.342	5728.17	4	424.425	5869.84	4	525.519	1562.21	1	364.774	6157.84	4	381.629	5741.37	4	391.052	5812.06	4	527.751	1609.72	1	366.395	6182.97	4	376.973	5919.86	4	384.782	6207.01	4	359.471	6150.77	4	370.987	5696.95
380.12	5835.75	4	380.397	5751.7	4	389.347	6285.64	4	534.525	1660.46	1	401.453	5847.31	4	405.451	5835.02	4	424.505	5804.5	4	525.521	1645.82	1	364.841	5792.67	4	381.647	5646.59	4	391.095	5973.33	4	527.778	1639.88	1	366.452	5941.96	4	377.003	5909.86	4	384.786	5745.45	4	359.485	5551.58	4	370.989	5794.51
380.198	6084.81	4	380.402	5576.22	4	389.37	5644.34	4	534.529	1623.34	1	401.538	5801.78	4	405.453	6037.61	4	424.517	6038.23	4	525.534	1729.69	1	364.885	5756.48	4	381.65	5591.34	4	391.153	6049.28	4	527.796	1612.13	1	366.477	5909.08	4	377.005	6031.13	4	384.788	5685.21	4	359.536	6010.9	4	370.996	6069.17
380.271	5751.64	4	380.44	5716.79	4	389.385	5911.46	4	534.539	1697.22	1	401.555	5822.15	4	405.549	6003.41	4	424.786	5672.95	4	525.58	1538.59	1	364.945	5738.94	4	381.666	5438.71	4	391.196	5804.07	4	527.83	1652.77	1	366.592	5952.49	4	377.013	5722.77	4	384.81	5757.57	4	359.543	5814.89	4	371.012	5993.45
380.398	5674.67	4	380.46	6034.76	4	389.47	5629.7	4	534.552	1615.32	1	401.603	6016.98	4	405.657	5666.4	4	424.807	5735.6	4	525.677	1617.37	1	364.954	5808.12	4	381.889	6137.97	4	391.245	5592.8	4	527.839	1715.95	1	366.621	5750.32	4	377.044	6314.49	4	384.826	6044.4	4	359.557	5879.4	4	371.102	5564.27
380.402	5688.35	4	380.501	5851.94	4	389.515	6271.85	4	534.592	1731.59	1	401.634	5869.87	4	405.66	5970.12	4	424.885	5685.76	4	525.677	1733.28	1	365.001	6000.75	4	381.927	5767.38	4	391.249	5711.82	4	527.859	1581.93	1	366.648	5781.75	4	377.054	5757.44	4	384.866	5870.64	4	359.568	5649.71	4	371.199	6262.02
380.464	6161.98	4	380.629	6107.57	4	389.531	5653.83	4	534.634	1625.07	1	401.648	5742.14	4	405.687	6160.75	4	424.889	5960.73	4	525.679	1657.19	1	365.003	5809.74	4	381.934	6128.49	4	391.253	5819.63	4	527.885	1709.78	1	366.706	5812.22	4	377.065	5725.53	4	384.977	5560.2	4	359.57	5644.85	4	371.203	5717.52
380.466	5749.82	4	380.631	6244.96	4	389.547	5609.28	4	534.683	1638.14	1	401.65	6027.05	4	405.718	5810.32	4	424.937	5638.8	4	525.716	1664.7	1	365.034	5927.06	4	381.985	6138.55	4	391.275	5866.55	4	527.89	1635.02	1	366.778	5831.3	4	377.131	5833.96	4	384.978	5712.71	4	359.579	5804.97	4	371.214	5329.14
380.542	5747.99	4	380.661	5826.77	4	389.565	5837.23	4	534.735	1587.37	1	401.767	5846.36	4	405.798	5965.3	4	424.967	5710.98	4	525.767	1573.23	1	365.038	6194.93	4	381.988	5805.52	4	391.295	5669.69	4	527.911	1547.95	1	366.813	5660.55	4	377.166	6402.23	4	384.994	5675.79	4	359.704	5763.48	4	371.237	5939.3
380.557	5665.65	4	380.677	6047.97	4	389.671	5580.78	4	534.792	1788.05	1	401.8	5589.19	4	405.831	5779.02	4	424.999	5588.07	4	525.78	1599.94	1	365.07	6268.89	4	382.022	5905.34	4	391.296	5778.19	4	527.957	1702.12	1	366.876	5890.33	4	377.2	5472.3	4	385.019	6068.52	4	359.76	5974.24	4	371.295	5341.22
380.564	5655.35	4	380.69	5950.66	4	389.715	5928.81	4	534.853	1618.1	1	401.871	5968.34	4	405.983	5768.74	4	425.044	5536.28	4	525.787	1581.17	1	365.073	5702.24	4	382.022	5509.41	4	391.297	5651.17	4	527.985	1618.7	1	366.889	5809.53	4	377.211	5417.83	4	385.063	5583.84	4	359.768	5893.52	4	371.311	5648.8
380.571	6136.57	4	380.696	5680.12	4	389.726	5729.76	4	534.854	1576.2	1	401.894	5668.15	4	405.983	6080.81	4	425.049	5892.77	4	525.939	1605.02	1	365.104	5657.96	4	382.042	5735.98	4	391.326	5839.66	4	527.987	1618.64	1	366.927	6335.73	4	377.294	5576.6	4	385.149	5822.87	4	359.781	5808.39	4	371.338	5400.12
380.726	5760.68	4	380.712	5837.3	4	389.741	5985.41	4	534.892	1735.5	1	402.138	5946.27	4	406.047	5580.81	4	425.166	5828.78	4	526.04	1639.8	1	365.168	5721.03	4	382.064	5852.84	4	391.36	5577.35	4	528.016	1641.55	1	366.95	5944.69	4	377.333	5594.78	4	385.149	5671.49	4	359.781	6064.65	4	371.431	5795.3
380.765	5863.68	4	380.722	5862.43	4	389.763	5925.29	4	534.899	1870.3	1	402.232	6095.24	4	406.094	5622.8	4	425.407	5746.41	4	526.04	1613.54	1	365.184	6020.23	4	382.133	5692.13	4	391.38	5939.02	4	528.033	1624.92	1	366.956	5918.97	4	377.334	5975.27	4	385.174	6131.2	4	359.793	5564.17	4	371.593	5859
380.77	5833.41	4	380.808	6247.09	4	389.768	5686.86	4	534.935	1612.21	1	402.26	5778.84	4	406.155	5361.17	4	425.421	6058.1	4	526.061	1655.16	1	365.188	5759.33	4	382.229	5561.11	4	391.391	5710.53	4	528.114	1863.04	1	367.07	5861.31	4	377.337	6355.68	4	385.187	5663.23	4	359.803	5483.85	4	371.647	5585.54
380.829	6285.57	4	380.818	6041.3	4	389.781	5656.46	4	534.942	1537.15	1	402.343	5545.22	4	406.164	6014.06	4	425.491	6029.76	4	526.079	1618.08	1	365.22	6193.85	4	382.253	5841.41	4	391.445	5989.25	4	528.12	1616.5	1	367.095	5905.31	4	377.343	5981.49	4	385.195	6118.86	4	359.881	5948.57	4	371.667	5615.96
380.838	5928.16	4	380.895	5798.99	4	389.822	5851.54	4	534.95	1580.73	1	402.37	5706.78	4	406.194	5676.81	4	425.491	5584.54	4	526.097	1665.83	1	365.294	5965.65	4	382.295	5630.12	4	391.451	5757.33	4	528.147	1836.1	1	367.107	5575.98	4	377.346	5667.7	4	385.225	5859.84	4	359.928	5552.24	4	371.691	6090.68
380.946	5885.76	4	381.025	5762.99	4	389.91	5639.71	4	535.053	1607.7	1	402.373	6113.38	4	406.209	5795.13	4	425.496	6150.83	4	526.137	1514.43	1	365.372	6147.83	4	382.305	6054.73	4	391.475	5779.51	4	528.168	1591.07	1	367.171	6014.21	4	377.4	6033.22	4	385.236	5785.22	4	359.942	5845.59	4	371.714	5747.91
381.075	5689.44	4	381.056	5567.5	4	389.927	6045.92	4	535.065	1653.7	1	402.43	6022.98	4	406.25	5623.45	4	425.532	5601.91	4	526.137	1530.18	1	365.39	6065.19	4	382.307	5805.13	4	391.547	5735.97	4	528.177	1627.23	1	367.209	5850.53	4	377.408	5631.92	4	385.278	6276.8	4	359.946	5802.99	4	371.755	5405.93
381.093	5400.36	4	381.085	5672.01	4	389.974	5807.23	4	535.082	1638.1	1	402.635	5722.33	4	406.327	6043.59	4	425.65	5813.04	4	526.17	1728.96	1	365.437	5688.71	4	382.345	5660.34	4	391.591	6287.92	4	528.189	1592.09	1	367.209	5847.44	4	377.414	5598.02	4	385.299	5571.48	4	360.053	6123.06	4	371.759	5421.84
381.137	5943.76	4	381.111	5728.51	4	389.998	5831.76	4	535.137	1624.44	1	402.662	5464.61	4	406.329	5733.41	4	425.668	5721.53	4	526.175	1696.35	1	365.446	5711.14	4	382.358	6246.78	4	391.631	5669.91	4	528.206	1609.8	1	367.228	5778.21	4	377.419	5524.3	4	385.303	5629.48	4	360.067	5722.22	4	371.774	5764.4
381.14	5877.4	4	381.141	5626.77	4	390.004	5563.27	4	535.15	1629.45	1	402.691	6028.73	4	406.334	5823.67	4	425.681	5753.73	4	526.229	1609.73	1	365.452	5662.15	4	382.366	5950.3	4	391.645	5681.39	4	528.235	1652.77	1	367.29	5719.77	4	377.422	5850.22	4	385.312	5657.93	4	360.117	5631.37	4	371.78	5543.07
381.199	5692.32	4	381.145	5803.73	4	390.034	5603.99	4	535.152	1574.67	1	402.697	5598.9	4	406.377	5616.92	4	425.718	5809.67	4	526.24	1524.66	1	365.515	5765.39	4	382.449	5558.19	4	391.677	5678.04	4	528.293	1768.68	1	367.337	5741.22	4	377.485	5652.08	4	385.315	5724.01	4	360.276	5847.24	4	371.782	5683.7
381.219	5630.51	4	381.171	5961.72	4	390.045	5647.24	4	535.162	1655.5	1	402.776	5996.68	4	406.438	5728.15	4	425.796	5752.96	4	526.261	1632.79	1	365.527	6099.37	4	382.451	6133.36	4	391.72	5752.09	4	528.338	1548.85	1	367.437	5683.78	4	377.495	5570.6	4	385.329	5907.01	4	360.314	5971.79	4	372.014	6095
381.241	5639.51	4	381.232	5869.13	4	390.222	5644.89	4	535.173	1672.1	1	402.788	5779.17	4	406.481	5827.98	4	425.819	5736.3	4	526.276	1675.95	1	365.54	5905.4	4	382.468	5778.86	4	391.721	5678.57	4	528.36	1679.83	1	367.463	5932.74	4	377.563	6145.7	4	385.375	5583.12	4	360.317	5556.39	4	372.073	5426.57
381.256	6060.37	4	381.278	5662	4	390.229	5951.68	4	535.185	1681.29	1	402.794	5452.57	4	406.492	5778.02	4	425.881	5973.43	4	526.369	1620.33	1	365.553	6173.65	4	382.516	5850.1	4	391.778	6286.04	4	528.377	1634.76	1	367.513	6162.27	4	377.639	5856.58	4	385.387	6177.72	4	360.365	5836.94	4	372.092	5710.97
381.329	6005.25	4	381.288	5675.56	4	390.421	6189.69	4	535.224	1616.89	1	402.848	6106.82	4	406.493	5601.04	4	425.908	5711.48	4	526.37	1623.62	1	365.558	5690.71	4	382.528	6059.38	4	391.936	5971.4	4	528.413	1582.81	1	367.525	5825.01	4	377.686	5663.55	4	385.417	5975.53	4	360.391	5659.31	4	372.11	5735.99
381.359	5906.79	4	381.308	6024.65	4	390.47	5791.96	4	535.233	1655.04	1	402.874	5858.66	4	406.516	6015.87	4	425.936	5892.8	4	526.376	1519.05	1	365.67	5804.52	4	382.555	5677.47	4	391.999	5633.57	4	528.453	1596.76	1	367.611	5760.54	4	377.83	5731.31	4	385.428	6276.48	4	360.406	5669.12	4	372.175	5735.97
381.41	5956.28	4	381.31	5767.72	4	390.497	6106.98	4	535.279	1514.52	1	402.876	5584.38	4	406.535	5609.25	4	425.977	5952.19	4	526.419	1732.79	1	365.688	5724.74	4	382.605	5776.94	4	392.002	6150.38	4	528.493	1635.79	1	367.751	5782.31	4	377.912	5784.17	4	385.469	5919.46	4	360.425	6016.31	4	372.182	5414.94
381.533	5786.57	4	381.313	5636.84	4	390.51	5771.54	4	535.303	1594.5	1	402.926	5818.44	4	406.56	5573.47	4	426.005	5955.6	4	526.445	1683.5	1	365.722	5800.74	4	382.671	5929.66	4	392.068	5828.55	4	528.51	1711.05	1	367.757	6096.35	4	377.937	5992.56	4	385.476	5824.4	4	360.439	5633.84	4	372.192	5621.57
381.568	5673.28	4	381.326	5595.84	4	390.533	5977.3	4	535.384	1637.11	1	402.968	5785.82	4	406.68	5977.61	4	426.009	5504.3	4	526.48	1584.19	1	365.747	5783.76	4	382.691	5511.04	4	392.068	5852.27	4	528.549	1599.95	1	367.798	5692.59	4	377.942	6230.69	4	385.522	5820.87	4	360.462	6351.28	4	372.194	6288.95
381.582	5561	4	381.333	5889.35	4	390.59	5898	4	535.403	1669.59	1	402.97	5924.28	4	406.776	5725.65	4	426.092	5619.16	4	526.483	1725.11	1	365.757	6268.82	4	382.693	5972.29	4	392.094	5773.05	4	528.571	1682.3	1	367.84	5676.69	4	377.946	5724.11	4	385.574	5715	4	360.48	5768.52	4	372.345	5682.6
381.586	6098.78	4	381.397	5799.3	4	390.605	5454.37	4	535.423	1619.76	1	402.982	5661.68	4	407.071	5554.92	4	426.109	5537.33	4	526.534	1677.9	1	365.793	5904.74	4	382.716	6367.05	4	392.116	5985.49	4	528.594	1749.49	1	367.861	5772.1	4	377.999	5510.88	4	385.594	5635.63	4	360.487	5748.21	4	372.42	5802.98
381.61	5535.18	4	381.446	5840.37	4	390.632	5725.04	4	535.487	1686.17	1	403.004	5748.79	4	407.08	5561.28	4	426.141	5828.46	4	526.54	1657.97	1	365.855	5764.89	4	382.742	5970.58	4	392.159	5704.57	4	528.608	1563.29	1	367.919	5641.14	4	378.01	6214.15	4	385.644	5986.55	4	360.503	5771.09	4	372.424	6123.35
381.649	5973.38	4	381.451	5704.38	4	390.661	5787.71	4	535.488	1712.6	1	403.015	5860.34	4	407.118	5694.98	4	426.167	5729.36	4	526.603	1695.68	1	365.869	5632.73	4	382.789	5715.74	4	392.209	5817.4	4	528.698	1653.09	1	367.922	5663.64	4	378.079	5731.76	4	385.677	6015.96	4	360.512	5875.3	4	372.443	5727
381.81	5720.63	4	381.468	5699.27	4	390.694	5846.33	4	535.494	1637.54	1	403.025	5677.98	4	407.129	5436.5	4	426.171	5700.24	4	526.652	1697.66	1	365.891	5430.64	4	382.797	5564.06	4	392.338	5734.41	4	528.705	1611.95	1	367.93	5889.59	4	378.084	5897.64	4	385.688	5647.77	4	360.54	6015.25	4	372.495	5690.89
381.825	5608.21	4	381.498	5997.18	4	390.716	5528.99	4	535.516	1531.33	1	403.037	5537.51	4	407.237	5665.32	4	426.248	5912.15	4	526.657	1570.67	1	365.911	6145.78	4	382.803	5725.63	4	392.349	5743.08	4	528.708	1601.34	1	368.013	5933.46	4	378.087	6318.22	4	385.707	5895.62	4	360.586	5621.5	4	372.543	5442.4
381.851	5707.92	4	381.53	5623.61	4	390.745	5771.01	4	535.52	1603.58	1	403.059	5543.54	4	407.281	5563.1	4	426.492	5763.29	4	526.705	1574.08	1	365.977	5813.69	4	382.848	6159.84	4	392.466	5734.78	4	528.742	1620.31	1	368.038	5897.86	4	378.087	6301.35	4	385.75	5673.39	4	360.603	5744.43	4	372.562	5657.89
381.856	5568.86	4	381.623	5655.43	4	390.836	6179.56	4	535.545	1633.67	1	403.199	5746.6	4	407.358	5680.68	4	426.517	5592.19	4	526.707	1626.09	1	366.071	5777.49	4	382.862	5764.72	4	392.528	5796.54	4	528.753	1580.74	1	368.061	6187.63	4	378.109	5915.84	4	385.764	5937.89	4	360.625	5612.02	4	372.607	5578.81
381.973	5746.01	4	381.647	6066.12	4	390.877	5934.48	4	535.569	1603.46	1	403.548	5589.76	4	407.371	5688.28	4	426.565	5823.02	4	526.726	1549.26	1	366.116	5704.43	4	382.964	5548.46	4	392.548	5973.42	4	528.777	1635.66	1	368.078	5680.41	4	378.171	5710.67	4	385.809	6074.88	4	360.689	5736.91	4	372.633	5685.29
382.112	6056.44	4	381.669	5896.18	4	390.902	5930.74	4	535.585	1690.56	1	403.616	5589.39	4	407.468	5781.29	4	426.702	5963.7	4	526.767	1622.39	1	366.179	5718.8	4	383.083	5984.83	4	392.614	5754.23	4	528.789	1677.11	1	368.103	5647	4	378.182	5557.52	4	385.825	5756.95	4	360.727	5696.48	4	372.704	6003.84
382.297	5924.21	4	381.678	5624.64	4	390.905	5848.13	4	535.619	1639.19	1	403.653	5428.1	4	407.564	5798.26	4	426.721	6122.89	4	526.776	1714.21	1	366.248	6010.44	4	383.123	5610.5	4	392.636	5946.54	4	528.853	1638.69	1	368.121	6052.82	4	378.204	5647.91	4	385.874	5511.95	4	360.75	5567.25	4	372.713	5702.31
382.305	5946.94	4	381.688	5520.37	4	390.912	5983.39	4	535.623	1711.58	1	403.718	5809.94	4	407.721	5737.29	4	426.722	5874.62	4	526.776	1663.68	1	366.308	5928.72	4	383.169	5992.88	4	392.695	5660.92	4	528.863	1641.52	1	368.128	5684.71	4	378.277	6127.61	4	385.9	5980.59	4	360.803	5844.77	4	372.73	6146.64
382.305	5675.25	4	381.722	5876.44	4	390.931	5779.55	4	535.624	1624.3	1	403.858	5767.55	4	407.721	6373.3	4	426.737	5804.74	4	526.823	1640.45	1	366.329	6072.49	4	383.229	5793.33	4	392.715	5603.33	4	528.89	1601.6	1	368.13	5814.4	4	378.288	5645.96	4	385.916	6439.93	4	360.825	5743.45	4	372.801	6093.47
382.321	5658.5	4	381.778	5681.87	4	390.933	5607.85	4	535.639	1714.3	1	403.938	5919	4	407.847	5709.24	4	426.744	5724.56	4	526.827	1608.09	1	366.376	6015.8	4	383.233	5761.82	4	392.752	5689.24	4	528.91	1776.3	1	368.21	5684.52	4	378.327	6338.48	4	385.939	5978.54	4	360.855	5589.15	4	372.835	5785.12
382.332	5731.51	4	381.93	5736.92	4	390.993	5675.72	4	535.674	1621.91	1	403.95	5873.74	4	407.857	5631.56	4	426.815	5281.23	4	526.902	1592.78	1	366.428	6204.88	4	383.243	5768.27	4	392.755	6179.64	4	528.928	1678.83	1	368.235	5816.04	4	378.336	5856.48	4	385.945	5751.83	4	360.855	5721.27	4	372.847	5686.04
382.461	5674.37	4	381.935	5618.66	4	391.03	5639.97	4	535.733	1564.11	1	404.03	5750.05	4	407.876	5580.43	4	426.82	6027.21	4	526.962	1663.04	1	366.429	6053.04	4	383.279	5580.56	4	392.767	5783.06	4	528.946	1642.38	1	368.265	5789.27	4	378.346	5873.45	4	385.945	5817.53	4	360.875	5584.38	4	372.915	5943.09
382.588	5438.02	4	381.938	6247.49	4	391.09	6201.93	4	535.744	1631.74	1	404.083	5662.41	4	407.927	5538.93	4	426.895	5794.36	4	526.965	1651.83	1	366.475	5697.98	4	383.286	5763.9	4	392.89	5723.86	4	528.971	1693.1	1	368.374	5807.75	4	378.421	5785.66	4	385.97	5896.9	4	360.886	5798.41	4	372.956	5621.71
382.595	6076.77	4	381.963	5609.01	4	391.21	5700.47	4	535.81	1640.93	1	404.102	5898.11	4	407.934	6184.58	4	426.899	5827.36	4	527.055	1649.56	1	366.526	5985.36	4	383.303	5963.26	4	392.925	6163.86	4	528.985	1632.9	1	368.561	6108.78	4	378.452	5863.64	4	385.997	5938.63	4	360.979	5674.68	4	372.987	6032.05
382.638	6166.49	4	381.968	6202.81	4	391.251	5618.62	4	535.828	1669.76	1	404.238	5597.93	4	407.934	5675.59	4	426.985	5690.26	4	527.076	1702.65	1	366.553	5935.52	4	383.324	5943.5	4	392.93	5693.17	4	528.986	1757.74	1	368.616	6011.26	4	378.519	5429.64	4	385.997	5628.27	4	361.016	5530.55	4	373.029	5565.08
382.642	5869.03	4	381.991	5707.91	4	391.292	5708.9	4	535.847	1658.2	1	404.24	5691.56	4	408.288	5589.61	4	427.037	5660.97	4	527.098	1596.4	1	366.576	5750.63	4	383.356	6041.2	4	392.949	5967.91	4	528.998	1733.47	1	368.673	6365.5	4	378.519	5648.26	4	386.088	5663.14	4	361.023	5756.28	4	373.089	5712.47
382.72	6211.86	4	382.035	6214.5	4	391.324	5708.72	4	535.869	1615.88	1	404.243	5371.45	4	408.301	5736.87	4	427.05	5585.96	4	527.105	1642.15	1	366.581	5560.55	4	383.379	5570.68	4	392.951	5807.03	4	529.016	1666.22	1	368.692	6152.78	4	378.582	6142.87	4	386.182	5940.41	4	361.031	6256.49	4	373.131	6299.37
382.759	6050.84	4	382.059	5924.88	4	391.335	6357.57	4	535.891	1590.63	1	404.356	6065.13	4	408.303	5760.68	4	427.067	5828.83	4	527.151	1567.21	1	366.635	5750.3	4	383.394	5827.42	4	392.979	5777.03	4	529.078	1599.83	1	368.707	5905.4	4	378.615	5693.97	4	386.36	5580.63	4	361.108	5653.73	4	373.14	6120.05
382.774	5842.19	4	382.084	6276.92	4	391.407	5841.47	4	535.902	1687.65	1	404.464	5423.52	4	408.325	5853.14	4	427.068	5612.45	4	527.18	1662.21	1	366.637	5864.5	4	383.421	5616.27	4	393.019	5836.83	4	529.117	1709.53	1	368.712	5696.6	4	378.638	5764.28	4	386.365	6434.27	4	361.175	5703.75	4	373.186	5691.39
382.776	5480.81	4	382.148	5791.91	4	391.49	5651.86	4	535.931	1610.13	1	404.513	5665.98	4	408.327	5829.99	4	427.077	5605.07	4	527.182	1589.23	1	366.642	5812.29	4	383.425	5714.16	4	393.073	5751.25	4	529.171	1680.23	1	368.734	5911.74	4	378.687	6227.91	4	386.419	5750.37	4	361.177	5697.48	4	373.2	5809.82
382.846	5559.55	4	382.154	6044.47	4	391.552	5843.86	4	535.946	1687.01	1	404.515	5853.14	4	408.371	5589.42	4	427.104	5315.74	4	527.194	1739.67	1	366.701	5823.37	4	383.43	5762.5	4	393.075	6059.87	4	529.193	1653.94	1	368.787	6143.46	4	378.688	5698.79	4	386.45	5715.55	4	361.18	5686.37	4	373.28	6231.3
382.993	5573.94	4	382.166	5713.42	4	391.556	6110.67	4	535.969	1657.64	1	404.561	5311.33	4	408.38	5873.39	4	427.126	5568.1	4	527.264	1648.3	1	366.74	5906	4	383.496	6096.05	4	393.078	6111.57	4	529.214	1531.97	1	368.788	5657.02	4	378.689	5850.23	4	386.476	5677.88	4	361.305	6036.67	4	373.29	5714.41
383.026	5784.98	4	382.269	6037.09	4	391.619	5961.79	4	535.988	1630.58	1	404.636	5666.96	4	408.407	5632.52	4	427.157	5669.03	4	527.275	1771.4	1	366.774	5822.76	4	383.53	5654.72	4	393.101	5560	4	529.244	1614.91	1	368.833	5897.22	4	378.722	6094.19	4	386.52	6134.66	4	361.335	5616.66	4	373.309	6205.81
383.113	5753.37	4	382.309	5698.62	4	391.62	5869.31	4	535.992	1522.6	1	404.786	5725.78	4	408.408	5843.55	4	427.19	6139.31	4	527.321	1754.19	1	366.784	5671.15	4	383.591	5805.38	4	393.133	5829.82	4	529.248	1617.41	1	368.868	5788.73	4	378.753	5639.93	4	386.623	5671.25	4	361.408	6032.6	4	373.324	5737.54
383.118	5600.25	4	382.352	5641.99	4	391.642	5566.7	4	536.018	1729.03	1	404.8	5757.83	4	408.431	5471.62	4	427.202	5683.49	4	527.324	1530.73	1	366.82	5872.53	4	383.633	5741.36	4	393.144	5900.75	4	529.278	1661.67	1	368.874	6133.71	4	378.791	6125.59	4	386.705	5576.34	4	361.413	5985.17	4	373.357	5526.95
383.119	5460.62	4	382.354	5814.36	4	391.664	6119.64	4	536.022	1591.61	1	404.826	5910.29	4	408.433	5512.6	4	427.255	5897.45	4	527.381	1663.06	1	366.867	5797.8	4	383.638	5721.99	4	393.169	5881.06	4	529.32	1693.6	1	368.976	5611.05	4	378.858	5547.34	4	386.722	5706.62	4	361.467	5791.53	4	373.379	5591.03
383.175	6022.93	4	382.381	5960.47	4	391.664	5545.05	4	536.033	1524.84	1	404.834	5700.16	4	408.607	5890.59	4	427.387	5772.68	4	527.382	1661.18	1	366.954	5684.83	4	383.679	5669.79	4	393.208	5663.98	4	529.342	1690.12	1	368.993	6188.57	4	378.976	5794.59	4	386.794	6263.27	4	361.493	5792.84	4	373.38	6013.1
383.366	5921.81	4	382.456	6127.54	4	391.679	5977.56	4	536.035	1623.9	1	404.9	5521.97	4	408.61	6172.75	4	427.419	5820.52	4	527.394	1512.57	1	366.971	5795.58	4	383.722	5667.28	4	393.216	5647.88	4	529.347	1647.74	1	369.103	5885.25	4	379.024	5677.8	4	386.843	5656.78	4	361.495	5785.57	4	373.386	5753.85
383.373	5543.91	4	382.501	5924.52	4	391.719	5772.8	4	536.061	1627.78	1	404.93	5808.63	4	408.663	5414.93	4	427.429	6031.34	4	527.411	1770.9	1	367.011	6034.25	4	383.727	5627.47	4	393.232	5720.75	4	529.362	1563.84	1	369.149	5639.54	4	379.036	5593.13	4	386.921	6045.28	4	361.535	5629.17	4	373.387	5458.58
383.434	5381.15	4	382.591	6126.8	4	391.768	5914.73	4	536.086	1632.68	1	405.039	5655.85	4	408.78	5776.09	4	427.467	5774.89	4	527.436	1725.13	1	367.021	5868.58	4	383.738	6416.78	4	393.255	6119.56	4	529.391	1683.8	1	369.154	6206.06	4	379.056	5756.85	4	386.932	6138.82	4	361.553	5809.1	4	373.513	5739.96
383.533	5830.17	4	382.592	5676.54	4	391.782	5901.12	4	536.109	1619.42	1	405.043	5737.99	4	408.94	5440.44	4	427.496	5587.61	4	527.497	1695.21	1	367.076	5730.41	4	383.759	5808.12	4	393.344	5588.72	4	529.491	1585.12	1	369.163	5733.75	4	379.074	5773.78	4	386.999	5965.88	4	361.589	5679.19	4	373.572	5764.3
383.553	5772.02	4	382.652	6076.56	4	391.787	5878.85	4	536.118	1606.61	1	405.111	5884.83	4	408.993	5717.61	4	427.503	5888.83	4	527.526	1623.06	1	367.141	6040.24	4	383.759	5675.34	4	393.346	5794.25	4	529.526	1714.98	1	369.256	5837.13	4	379.106	5925.41	4	387.012	5431.01	4	361.61	5858.93	4	373.582	5913.63
383.611	5860.02	4	382.653	5518.02	4	391.839	5802.5	4	536.125	1835.56	1	405.115	5777.03	4	409.075	5879.18	4	427.549	5803.71	4	527.607	1739.64	1	367.17	5771.83	4	383.784	5862.71	4	393.395	5754.59	4	529.583	1529.83	1	369.296	5993.15	4	379.121	5614.26	4	387.052	5499.46	4	361.63	6051.37	4	373.616	5754.05
383.617	5795.19	4	382.668	5634.85	4	391.915	5891.17	4	536.141	1694.32	1	405.294	5832.43	4	409.137	5623.26	4	427.826	5903.16	4	527.668	1623.5	1	367.189	6063.54	4	383.821	5645.68	4	393.41	5717.32	4	529.589	1717.38	1	369.305	5827.26	4	379.14	5623.53	4	387.082	6000.28	4	361.66	5576.27	4	373.649	5883.9
383.622	5716.76	4	382.694	5491.35	4	391.941	5867.73	4	536.18	1705.97	1	405.315	5742.75	4	409.16	5839.87	4	427.884	5394.84	4	527.74	1656.65	1	367.211	6043.57	4	383.84	5516.75	4	393.418	5731.83	4	529.591	1644.73	1	369.318	6054.01	4	379.206	5682.13	4	387.12	5736.83	4	361.667	6193.29	4	373.657	5512.17
383.629	5616.48	4	382.695	5779.09	4	391.945	5982.84	4	536.227	1701.78	1	405.347	5640.05	4	409.2	5764.01	4	427.894	5660.8	4	527.769	1618.05	1	367.241	6045.14	4	384	5696.79	4	393.419	5978.35	4	529.596	1668.81	1	369.35	5850.69	4	379.28	5547.75	4	387.132	5660.56	4	361.673	5796.51	4	373.741	6038.68
383.644	5704.82	4	382.702	5948.45	4	391.981	5767.08	4	536.254	1507.43	1	405.364	5740.91	4	409.202	5574.42	4	427.911	5668.4	4	527.776	1615.99	1	367.352	6013.09	4	384.028	5617.96	4	393.45	5872.04	4	529.596	1621.54	1	369.426	5906.22	4	379.397	6093.66	4	387.161	5951.11	4	361.693	5683.9	4	373.748	6018.88
383.676	5660.8	4	382.718	5520.61	4	392.084	5837.2	4	536.307	1667.07	1	405.415	5656.11	4	409.209	5685.89	4	427.978	6110.65	4	527.803	1850.92	1	367.357	5545.36	4	384.057	5829.17	4	393.46	5950.27	4	529.673	1637.62	1	369.476	5751.43	4	379.397	5668.09	4	387.181	6081.39	4	361.701	5715.66	4	373.749	5888.69
383.712	5666.88	4	382.739	5583.38	4	392.116	6196.5	4	536.336	1596.13	1	405.441	6237.77	4	409.375	5645.88	4	428.176	5879.48	4	527.887	1617.77	1	367.379	5984.86	4	384.064	5568.35	4	393.484	5589.41	4	529.688	1666.68	1	369.493	5796.52	4	379.418	5852.51	4	387.251	5863.55	4	361.714	5587.35	4	373.788	5677.97
383.767	6175	4	382.768	5829.51	4	392.159	6067	4	536.394	1637.71	1	405.521	5826.9	4	409.386	5848.27	4	428.181	6211.87	4	527.939	1658.81	1	367.422	6079.41	4	384.106	5833.61	4	393.492	5882.74	4	529.719	1693.46	1	369.527	6084.98	4	379.419	5959.97	4	387.256	5691.84	4	361.799	6091.02	4	373.801	5640.28
383.775	5575.95	4	382.791	5738.63	4	392.163	5538.64	4	536.408	1633.53	1	405.586	5566.25	4	409.401	6000.94	4	428.19	5939.55	4	527.967	1645.69	1	367.425	5564.2	4	384.157	5742.66	4	393.519	5623.59	4	529.739	1632.02	1	369.547	5728.59	4	379.458	5622.3	4	387.275	5566.52	4	361.821	5630.28	4	373.824	5804.3
383.827	5985.36	4	382.796	5617.18	4	392.195	5938.24	4	536.417	1539.61	1	405.663	5892.35	4	409.485	5760.21	4	428.258	5672.54	4	527.983	1652.32	1	367.462	6053.51	4	384.165	5725.97	4	393.558	5615.84	4	529.771	1793.76	1	369.552	5910.63	4	379.466	5387.35	4	387.276	5901.4	4	361.839	6087.32	4	373.838	5651
383.842	5935	4	382.805	5617.82	4	392.199	5766.16	4	536.465	1649.34	1	405.796	6109.16	4	409.494	6109.78	4	428.263	5683.6	4	528.025	1546.96	1	367.566	5793.02	4	384.184	5816.85	4	393.61	5930.53	4	529.785	1636.44	1	369.574	6225.51	4	379.478	5486.78	4	387.281	5830.53	4	361.868	5683.48	4	373.866	5628.78
383.852	5868.47	4	382.812	5867.98	4	392.202	5931.57	4	536.476	1625.34	1	405.798	5855.79	4	409.557	5406.15	4	428.272	5923.1	4	528.027	1592.66	1	367.58	5822.77	4	384.211	6114.96	4	393.636	5886.56	4	529.786	1810.27	1	369.584	5762.72	4	379.599	6016.39	4	387.299	5866.7	4	361.878	5864.48	4	373.88	6197.37
383.862	5527.12	4	382.84	5669.93	4	392.229	5742.22	4	536.487	1567.31	1	405.837	5920.83	4	409.633	5806.43	4	428.379	5852.7	4	528.088	1599.67	1	367.645	5839.02	4	384.225	5732.33	4	393.723	5699.5	4	529.803	1563.4	1	369.635	5787.26	4	379.621	6273.38	4	387.313	6200.01	4	361.893	5647.53	4	373.884	5692.87
384.019	5586.07	4	382.865	5975.14	4	392.243	5684.63	4	536.521	1622.69	1	405.868	5854.95	4	409.637	5715.44	4	428.427	5796.82	4	528.102	1609.72	1	367.663	5816.15	4	384.316	5752.81	4	393.731	5641.34	4	529.809	1834.76	1	369.64	5688.47	4	379.637	6125.98	4	387.381	5890.09	4	362.005	5756.12	4	374.022	5492.92
384.041	6072.61	4	382.869	5744.17	4	392.28	5733.73	4	536.542	1745.33	1	405.878	5704.02	4	409.728	5699.41	4	428.556	5744.6	4	528.144	1605.09	1	367.696	5879.2	4	384.329	5852.14	4	393.755	5752.36	4	529.829	1684.68	1	369.655	5980.33	4	379.656	5818.45	4	387.423	5731.64	4	362.014	5785.7	4	374.094	5685.7
384.136	5948.1	4	382.884	5619.61	4	392.324	6040.24	4	536.562	1799.08	1	405.879	5624.46	4	409.751	5709.79	4	428.597	5789.34	4	528.159	1613.59	1	367.712	5699.87	4	384.342	5822.21	4	393.773	6056.27	4	529.832	1575.07	1	369.686	5906.77	4	379.657	5625.95	4	387.503	5748.95	4	362.037	5973.96	4	374.183	5859.89
384.138	5990.3	4	382.992	5763.26	4	392.379	5603.07	4	536.602	1517.69	1	405.963	5667.14	4	409.83	5529.58	4	428.628	5631.7	4	528.176	1579.77	1	367.714	5738.33	4	384.349	5704.39	4	393.838	5841.84	4	529.851	1665.41	1	369.689	5600.78	4	379.669	5793.19	4	387.568	5599.66	4	362.068	6038.19	4	374.191	5576.9
384.139	5671.98	4	383.014	5749.91	4	392.419	5924.24	4	536.617	1638.14	1	406.118	5722.4	4	410.057	5598.87	4	428.7	5646.41	4	528.236	1682.08	1	367.736	5923.92	4	384.355	5793.34	4	393.846	5740.88	4	529.862	1653.98	1	369.754	5820.9	4	379.684	5623.49	4	387.585	5932.24	4	362.086	5789.94	4	374.249	5779.94
384.145	5951.69	4	383.02	5680.04	4	392.444	5777.34	4	536.658	1641.11	1	406.147	5665.24	4	410.095	5860.67	4	428.717	5461.1	4	528.253	1574.36	1	367.76	5839.42	4	384.398	5693.62	4	393.882	6124	4	529.891	1633.39	1	369.76	5945.66	4	379.758	5761.91	4	387.62	6024.27	4	362.099	6090.36	4	374.27	5784.11
384.284	5414.13	4	383.037	5735.97	4	392.467	5573.8	4	536.677	1678.96	1	406.164	5751.16	4	410.112	6047.2	4	428.765	5777.5	4	528.274	1623.41	1	367.814	5788.81	4	384.405	6123.34	4	393.95	5764.81	4	529.917	1611.2	1	369.805	6156.6	4	379.76	5761.65	4	387.626	5747.78	4	362.172	5579.1	4	374.342	5821.57
384.318	5712.62	4	383.086	5993	4	392.467	5714.77	4	536.696	1557.19	1	406.189	5915.64	4	410.199	5651.91	4	428.766	5902.4	4	528.289	1598.99	1	368	5964.6	4	384.42	5960.98	4	393.954	5771.51	4	529.97	1659.66	1	369.848	5873.4	4	379.768	5767.17	4	387.646	6363.2	4	362.18	5910.42	4	374.354	5567.44
384.327	5585.25	4	383.154	6051.09	4	392.541	5638.18	4	536.702	1658.86	1	406.233	5762.35	4	410.214	5393.8	4	428.814	5723.6	4	528.321	1699.54	1	368.007	5852.7	4	384.421	6288.52	4	393.957	5682.63	4	529.98	1616.72	1	369.855	5680.87	4	379.784	5558.87	4	387.659	5666.91	4	362.19	5707.23	4	374.376	5771.09
384.337	5749.31	4	383.196	6050.97	4	392.653	5776.36	4	536.728	1699.03	1	406.318	5983.02	4	410.254	5905.25	4	428.821	6129.61	4	528.384	1619.67	1	368.021	5804.01	4	384.467	5829.03	4	394.02	5826.98	4	530.008	1680.68	1	369.874	5995.57	4	379.798	5698.84	4	387.686	6055.49	4	362.198	5641.29	4	374.421	5774.37
384.382	5778.9	4	383.198	5907.13	4	392.673	5603.36	4	536.73	1613.37	1	406.359	6162.28	4	410.338	6013.94	4	428.924	5548.03	4	528.386	1655.16	1	368.024	5917.27	4	384.494	6235.23	4	394.035	5781.96	4	530.037	1599.18	1	369.927	5914.52	4	379.804	6034.22	4	387.706	5547.3	4	362.213	5831.33	4	374.469	5608.87
384.407	5607.51	4	383.201	5731.04	4	392.689	5967.28	4	536.733	1649.47	1	406.426	6217.35	4	410.366	5735.69	4	428.929	5608.42	4	528.388	1607.09	1	368.062	5662.81	4	384.549	5375.1	4	394.104	5747.83	4	530.049	1645.78	1	370.041	6103.98	4	379.805	6168.09	4	387.723	5610.16	4	362.234	6200.47	4	374.48	6229.02
384.429	5539.32	4	383.307	5786.51	4	392.692	5735.07	4	536.736	1716.95	1	406.433	5836.67	4	410.398	5748.46	4	429.014	5825.14	4	528.433	1721.69	1	368.066	5592.64	4	384.587	5847.38	4	394.186	5693.89	4	530.113	1636.29	1	370.075	5758.67	4	379.805	5749.58	4	387.735	6120.02	4	362.242	5949.81	4	374.501	5593.47
384.543	5459.81	4	383.325	5613.35	4	392.728	5552.22	4	536.744	1714.5	1	406.556	5777.45	4	410.447	5877.76	4	429.114	5571.17	4	528.457	1558.36	1	368.098	5839.13	4	384.589	5678.76	4	394.197	5719.69	4	530.122	1657.29	1	370.101	5793.42	4	379.811	5626.77	4	387.756	5860.34	4	362.265	5534.85	4	374.634	5728.25
384.64	5556.12	4	383.337	5573.32	4	392.761	5951.08	4	536.783	1762.53	1	406.721	5276.95	4	410.468	5878.03	4	429.147	5895.21	4	528.494	1550.73	1	368.153	5926.39	4	384.596	5694.66	4	394.232	5948.57	4	530.153	1712.5	1	370.116	5750.65	4	379.826	5698.4	4	387.857	5767.64	4	362.314	6154.36	4	374.683	5577.21
384.673	5632.38	4	383.344	5739.62	4	392.786	6156.47	4	536.784	1621.69	1	406.782	5680.67	4	410.491	5724.62	4	429.17	6051.25	4	528.537	1682.46	1	368.184	5814.73	4	384.659	5972.38	4	394.251	5644.89	4	530.176	1672.06	1	370.188	5641.97	4	379.911	5738.85	4	387.885	6053.71	4	362.336	5841.77	4	374.692	5733.61
384.706	5835.55	4	383.427	5930.9	4	392.796	6124.81	4	536.789	1790.66	1	406.842	5460.83	4	410.605	5550.08	4	429.222	5614.23	4	528.658	1666.51	1	368.205	5673.93	4	384.676	5954.81	4	394.254	5703.2	4	530.219	1592.29	1	370.206	6055.73	4	379.923	5472.95	4	387.89	6099.42	4	362.37	5771.47	4	374.71	5916.01
384.725	5733.61	4	383.436	5690.84	4	392.808	5731.73	4	536.806	1669.89	1	406.88	6236.75	4	410.639	5737.96	4	429.229	5497.51	4	528.713	1660.65	1	368.213	6053.6	4	384.732	6292.85	4	394.266	5748.58	4	530.247	1684.97	1	370.272	5636.97	4	379.949	5661.83	4	387.909	5900.98	4	362.405	5937.18	4	374.845	5541.61
384.785	6157.05	4	383.498	5693.51	4	392.836	5848.87	4	536.828	1525.12	1	406.983	5779.4	4	410.676	5786.69	4	429.236	5890.23	4	528.732	1658.12	1	368.235	6078.09	4	384.737	5846.85	4	394.296	5868.95	4	530.26	1657.91	1	370.296	5761.43	4	379.972	5851.91	4	387.923	5641.05	4	362.418	5803.21	4	374.933	6008.68
384.857	5520.36	4	383.587	6120.67	4	392.844	5662.12	4	536.842	1477.89	1	406.984	5737.1	4	410.678	5632.91	4	429.245	5731.3	4	528.786	1619.77	1	368.246	5925.89	4	384.743	5599.41	4	394.345	5771.53	4	530.274	1629.22	1	370.338	5547.83	4	379.994	5669.76	4	387.952	5619.86	4	362.425	5689.48	4	374.971	5658.81
384.871	5630.03	4	383.643	5947.16	4	392.884	5608.33	4	536.859	1683.98	1	407.008	5639.61	4	410.69	5589.65	4	429.285	5643.37	4	528.826	1553.03	1	368.281	5901.22	4	384.827	6194.6	4	394.345	5726.45	4	530.294	1626.12	1	370.371	5812.2	4	380.086	5576.01	4	387.953	6125.25	4	362.425	5647.39	4	374.972	5580.62
384.897	5596.38	4	383.648	6257.22	4	392.983	6279.05	4	536.893	1618.47	1	407.013	5702.84	4	410.739	5451.93	4	429.297	5624.01	4	528.829	1585.31	1	368.383	5716.51	4	384.838	6173.6	4	394.357	6008.82	4	530.315	1625.37	1	370.395	5786.74	4	380.146	6029.87	4	388.006	5834.28	4	362.483	5829.82	4	375.003	5994.64
384.968	5740.15	4	383.773	5928.83	4	393.004	5695.67	4	536.895	1675.03	1	407.015	5758.39	4	410.802	5645.15	4	429.386	5480.52	4	528.842	1564.1	1	368.399	5792.18	4	384.846	5943.07	4	394.365	5588.06	4	530.327	1635.45	1	370.448	5742.33	4	380.155	5604.62	4	388.067	5853.29	4	362.522	5818.18	4	375.052	5879.49
385.103	5940.2	4	383.8	5727.87	4	393.007	5856.44	4	536.897	1766.78	1	407.078	5825.25	4	410.823	5649.93	4	429.528	5571.53	4	528.848	1686.03	1	368.431	5859.94	4	384.856	5781.68	4	394.372	5750.54	4	530.337	1742.73	1	370.449	6037.98	4	380.175	5698.89	4	388.068	5841.15	4	362.529	6028.29	4	375.121	5646.57
385.21	5884.03	4	383.807	5735.4	4	393.053	5743.14	4	536.937	1734.68	1	407.33	5634.6	4	410.918	5530.51	4	429.539	5716.25	4	528.855	1624.83	1	368.442	5772.97	4	384.904	5838.78	4	394.408	5874.1	4	530.344	1589.1	1	370.451	5758.27	4	380.189	5739.58	4	388.082	5821.45	4	362.539	6114.8	4	375.131	6005.18
385.241	5604.8	4	383.825	5812.66	4	393.149	5977.78	4	536.977	1640.08	1	407.361	5759.1	4	410.934	5616.73	4	429.605	5574.49	4	528.916	1616.95	1	368.482	5976.72	4	384.936	5828.41	4	394.411	5622.17	4	530.37	1532.8	1	370.459	5985.23	4	380.203	5550.24	4	388.126	6190.18	4	362.547	5961.59	4	375.138	5542.24
385.295	5916.79	4	383.887	5570.17	4	393.15	5966.75	4	536.981	1592.29	1	407.417	5647.93	4	411.184	6001.02	4	429.641	5777.54	4	528.933	1600.83	1	368.528	5740.23	4	384.941	5807.31	4	394.414	5727.18	4	530.371	1574.16	1	370.493	6103.73	4	380.261	5715.71	4	388.153	5797.36	4	362.558	5749.98	4	375.188	5780.16
385.295	5609.08	4	383.902	5990.46	4	393.206	5654.71	4	536.986	1704.22	1	407.52	5787.33	4	411.194	5718.21	4	429.729	5911.28	4	528.965	1650.94	1	368.536	5715.89	4	384.953	6223.49	4	394.416	5625.21	4	530.41	1532.72	1	370.616	6111.07	4	380.341	5860.61	4	388.158	6054.12	4	362.587	5790.11	4	375.226	5548.67
385.299	6118.06	4	383.959	5840.09	4	393.277	5991.62	4	536.988	1643.98	1	407.586	5921.31	4	411.291	6223.79	4	429.736	6132.74	4	528.98	1678.96	1	368.548	6166.17	4	384.982	5835.98	4	394.529	6118.76	4	530.49	1641.29	1	370.691	5930.48	4	380.38	6013.96	4	388.208	6081.18	4	362.633	5764.03	4	375.231	5495.35
385.323	5688.5	4	384.012	6452.45	4	393.397	5982.1	4	537.009	1621.7	1	407.64	5737.55	4	411.296	5419.73	4	429.819	5748.59	4	529.002	1576.94	1	368.554	5597.34	4	384.988	5673.6	4	394.547	5757.08	4	530.494	1647.48	1	370.85	5824.85	4	380.424	6248.98	4	388.217	5677.88	4	362.782	5590.56	4	375.254	5687.92
385.415	5206.25	4	384.019	5741.64	4	393.424	5975.71	4	537.148	1631.74	1	407.691	5806.61	4	411.307	6190.35	4	429.881	5850.93	4	529.028	1686.96	1	368.601	5693.92	4	385.061	5757.23	4	394.596	6116.63	4	530.503	1682.65	1	370.904	5791.43	4	380.481	5854.73	4	388.219	5792.82	4	362.832	5767.91	4	375.259	5888.43
385.416	5442.65	4	384.03	5952.12	4	393.465	5836.72	4	537.151	1646.15	1	407.809	5685.07	4	411.389	5589.43	4	429.901	5652.4	4	529.046	1660.44	1	368.617	5670.75	4	385.161	6039.52	4	394.599	5776.11	4	530.507	1490.17	1	370.933	5907.9	4	380.497	5965.75	4	388.228	5671.75	4	362.889	5609.09	4	375.318	5621.85
385.419	5531.17	4	384.055	6117.17	4	393.469	5694.8	4	537.227	1536.54	1	407.869	5593.14	4	411.429	5405.16	4	429.947	5768.96	4	529.096	1680.03	1	368.645	5699.29	4	385.264	6104.87	4	394.656	5921.83	4	530.51	1623.99	1	370.989	6058.59	4	380.574	5792.76	4	388.255	5734.69	4	362.905	5658.34	4	375.341	5959.91
385.492	5562.74	4	384.062	5954.51	4	393.483	5628.74	4	537.231	1635.99	1	407.886	5860.23	4	411.507	5449.91	4	429.979	5534.62	4	529.122	1602.84	1	368.671	6148.3	4	385.281	5546.48	4	394.832	6267.01	4	530.512	1654.53	1	371.076	5920.45	4	380.584	6193.25	4	388.261	5875.66	4	362.958	5889.85	4	375.342	6264.54
385.553	5569.77	4	384.074	5798.38	4	393.484	6179.34	4	537.288	1675.76	1	407.939	5633.19	4	411.577	6000.7	4	429.991	5567.66	4	529.149	1746.84	1	368.683	5802.1	4	385.311	5800.96	4	394.862	6149.61	4	530.545	1626.08	1	371.084	5681.87	4	380.591	5523.1	4	388.261	5779.53	4	362.976	5655.53	4	375.369	5501.84
385.593	5463.5	4	384.106	5691.82	4	393.53	5805.09	4	537.304	1885.72	1	407.948	5772.77	4	411.608	5797.28	4	430.123	5544.15	4	529.151	1609.09	1	368.929	5784.06	4	385.32	5815.42	4	394.87	5882.97	4	530.588	1562.62	1	371.1	5934.78	4	380.614	5620	4	388.273	5920.87	4	362.988	5907.05	4	375.435	5778.61
385.639	5819.89	4	384.106	5640.64	4	393.536	6102.3	4	537.324	1609.86	1	408.163	5626.85	4	411.744	5795.91	4	430.136	5769.93	4	529.153	1720.03	1	368.962	6121.02	4	385.33	5630.82	4	394.908	5830.92	4	530.601	1646.76	1	371.115	5968.74	4	380.645	5880.25	4	388.313	5661.52	4	363	5829.58	4	375.502	5675.4
385.651	5796.96	4	384.145	6102.44	4	393.577	6024.08	4	537.335	1574.24	1	408.274	6197.85	4	411.784	5406.13	4	430.2	5486.91	4	529.161	1668.19	1	368.982	5518.27	4	385.337	6138.87	4	394.922	5906.74	4	530.616	1544.48	1	371.148	5736.5	4	380.656	6017.06	4	388.347	5729.78	4	363.002	5467.98	4	375.569	5837.51
385.699	6105.36	4	384.211	5922.88	4	393.648	5785.23	4	537.344	1619.98	1	408.316	5640.16	4	411.883	6142.81	4	430.202	5519.04	4	529.206	1631.51	1	368.991	6380.25	4	385.341	6023.85	4	394.976	5911.48	4	530.622	1665.24	1	371.218	5804.33	4	380.701	5822.66	4	388.347	5815.4	4	363.004	6207.14	4	375.584	5618.93
385.755	5470.29	4	384.225	6020.74	4	393.655	5820.28	4	537.36	1630.76	1	408.329	5792.17	4	412.063	6116.3	4	430.318	5737.31	4	529.214	1565.64	1	368.996	5624.31	4	385.346	6157.46	4	394.994	5823.3	4	530.63	1578.17	1	371.236	6298.91	4	380.737	5591.59	4	388.539	5680.06	4	363.077	5969.13	4	375.608	6265.34
385.779	5661.14	4	384.301	5610.94	4	393.669	6132.87	4	537.371	1705.13	1	408.514	6188.94	4	412.067	5789.05	4	430.5	5744.33	4	529.267	1641.97	1	369.022	5851.99	4	385.348	5578.76	4	395.018	5924.95	4	530.663	1652.3	1	371.259	5801.36	4	380.787	5753.52	4	388.55	5652.22	4	363.09	5675.88	4	375.654	5565.12
385.813	5279.12	4	384.305	5772.82	4	393.698	5906.54	4	537.377	1632.04	1	408.523	5759.89	4	412.1	5699.74	4	430.516	5433.38	4	529.273	1614.15	1	369.027	6031.4	4	385.364	5579.71	4	395.044	5738.8	4	530.675	1643.78	1	371.278	5759.69	4	380.886	5940.32	4	388.567	5868.05	4	363.1	5979.06	4	375.68	5564.79
385.874	5665.77	4	384.31	5683.64	4	393.703	6052.61	4	537.38	1627.79	1	408.547	6089.6	4	412.105	6201.77	4	430.524	5722.08	4	529.28	1628.41	1	369.083	6045.16	4	385.381	6208.22	4	395.048	5840.77	4	530.709	1628.18	1	371.284	5843.04	4	380.898	5761.94	4	388.617	6108.88	4	363.158	5693.06	4	375.687	5797.98
385.92	5718.46	4	384.319	5749.4	4	393.722	5700.33	4	537.383	1577.49	1	408.548	5816.72	4	412.111	5814.37	4	430.594	6065.79	4	529.294	1607.53	1	369.09	6069.24	4	385.424	5535.73	4	395.056	5766.34	4	530.742	1549.73	1	371.291	5840.51	4	380.913	5739.21	4	388.652	5950.29	4	363.215	6078.15	4	375.707	5810.58
385.939	5423.24	4	384.332	5825.38	4	393.743	6313.9	4	537.395	1603	1	408.578	5591.25	4	412.159	5648.9	4	430.614	5662.29	4	529.3	1716.48	1	369.118	5677.56	4	385.452	5841.3	4	395.095	5655.78	4	530.77	1612.36	1	371.315	5806.05	4	380.93	5711.58	4	388.673	5532.39	4	363.244	5883.6	4	375.759	5891.69
386.013	5731.46	4	384.351	5775.47	4	393.748	5749.43	4	537.423	1812.01	1	408.598	5847.93	4	412.296	5767.52	4	430.614	5641.34	4	529.333	1567.14	1	369.124	5796.61	4	385.471	5467.54	4	395.101	5638.16	4	530.801	1617.12	1	371.334	5866.97	4	381.014	5748.64	4	388.714	5821.23	4	363.255	6008.38	4	375.762	5530.33
386.019	5964.64	4	384.353	5818.53	4	393.81	5679.43	4	537.434	1651.4	1	408.642	5800.71	4	412.296	5742.01	4	430.641	5736.23	4	529.41	1641.13	1	369.125	5706.21	4	385.474	5736.6	4	395.105	5838.66	4	530.803	1685.84	1	371.342	5794.38	4	381.037	5942.57	4	388.724	5938.99	4	363.283	5647.3	4	375.793	6178.14
386.027	5681.6	4	384.373	5613.02	4	393.861	5753.6	4	537.454	1702.69	1	408.659	5568.6	4	412.312	5775.15	4	430.665	5698.8	4	529.422	1667.88	1	369.163	6023.63	4	385.479	6195.4	4	395.124	5844.84	4	530.809	1656.77	1	371.342	5961.21	4	381.043	5444.74	4	388.876	5903.09	4	363.317	5807.15	4	375.83	5535.61
386.085	5588.86	4	384.412	5698.46	4	393.874	5535.47	4	537.481	1643.3	1	408.733	5892.66	4	412.38	6125.99	4	430.858	5646.71	4	529.462	1623.51	1	369.184	5833.74	4	385.511	5822.58	4	395.182	5773.72	4	530.823	1752.09	1	371.397	6140.16	4	381.062	5684.64	4	388.902	5688.5	4	363.344	5648.5	4	375.885	5914.21
386.129	5511.6	4	384.489	5672.56	4	393.892	5709.7	4	537.587	1705.41	1	408.912	5865.08	4	412.391	5606.14	4	430.957	5467.06	4	529.484	1568.56	1	369.224	6548.74	4	385.576	5896.92	4	395.2	6373.04	4	530.824	1608.1	1	371.406	6322.86	4	381.076	5908.59	4	388.923	5773.21	4	363.348	6164.15	4	375.904	5780.22
386.131	5638.21	4	384.552	5685.17	4	393.895	5735.85	4	537.595	1620.66	1	408.936	5787.35	4	412.395	5609.38	4	430.985	5616.32	4	529.496	1791.91	1	369.253	5830.39	4	385.584	6097.77	4	395.224	5892.86	4	530.834	1714.44	1	371.419	6028.77	4	381.146	6111.44	4	388.944	5426.32	4	363.373	5930.26	4	375.952	5708.71
386.143	5700	4	384.626	5753.5	4	393.896	6113.01	4	537.63	1631.39	1	408.94	5416.16	4	412.418	5683.42	4	430.987	5637.68	4	529.499	1612.35	1	369.353	5780.13	4	385.652	5952.58	4	395.273	5840.97	4	530.841	1647.17	1	371.451	6297.18	4	381.17	6144.01	4	389.048	5956	4	363.455	5650.89	4	375.98	5640.66
386.162	5801.45	4	384.628	5674.51	4	393.918	5801.36	4	537.642	1668.26	1	408.984	5647.56	4	412.419	6150.46	4	431.057	5750.78	4	529.507	1678.65	1	369.37	5818.81	4	385.66	6021.5	4	395.275	5799.67	4	530.871	1660.94	1	371.469	6024.03	4	381.176	5875.62	4	389.218	5613.23	4	363.465	5721.42	4	375.989	5567.06
386.167	5926.03	4	384.629	5887.74	4	393.938	5805.44	4	537.68	1786.09	1	409.012	5713.02	4	412.472	5530.22	4	431.068	5802.11	4	529.511	1663.92	1	369.399	6321.4	4	385.685	5878.49	4	395.288	5744.07	4	530.882	1611.69	1	371.496	5736.57	4	381.178	5792.02	4	389.244	5587.14	4	363.503	5775.93	4	375.993	5805.57
386.179	5783.89	4	384.636	5809.77	4	394.023	5644.77	4	537.687	1679.73	1	409.027	5939.62	4	412.566	5556.21	4	431.142	5693.41	4	529.533	1590.52	1	369.436	5639.86	4	385.723	5748.95	4	395.348	5951.24	4	530.924	1607.51	1	371.545	5953.28	4	381.195	5526.73	4	389.245	5838.32	4	363.507	5799.2	4	376.07	5428.21
386.219	5411.72	4	384.642	5890.07	4	394.081	5855.88	4	537.713	1773.52	1	409.101	5737.57	4	412.566	6132.55	4	431.153	5411.36	4	529.547	1665.56	1	369.441	5727.05	4	385.788	5825.49	4	395.364	5811.64	4	530.985	1587.64	1	371.549	5700.55	4	381.24	6021.24	4	389.248	5850.65	4	363.535	5662.36	4	376.082	5884.98
386.227	5487.51	4	384.663	5710.71	4	394.099	6260.49	4	537.724	1588.7	1	409.205	5878.26	4	412.572	6076.05	4	431.218	5741.91	4	529.603	1597.31	1	369.497	5820.95	4	385.793	5605.33	4	395.38	6003.41	4	530.993	1584.09	1	371.585	5847.53	4	381.292	5917.77	4	389.26	5705.25	4	363.558	6037.96	4	376.19	5584.39
386.297	5697.14	4	384.667	5758.64	4	394.117	5541.71	4	537.744	1584.12	1	409.226	5915.45	4	412.602	5686.55	4	431.243	5592.35	4	529.61	1709.97	1	369.501	6077.74	4	385.819	5613.31	4	395.382	5930.31	4	531	1585.98	1	371.588	6307.2	4	381.296	5690.22	4	389.272	5941.77	4	363.571	5605.03	4	376.2	6251.91
386.358	5814.34	4	384.695	5601.45	4	394.264	5905.51	4	537.746	1519.09	1	409.239	5907.06	4	412.677	5673.37	4	431.292	6250.92	4	529.612	1713.03	1	369.512	5884.8	4	385.82	5747.28	4	395.384	5996.2	4	531.007	1709.52	1	371.65	5758.24	4	381.322	6064.91	4	389.318	5807.77	4	363.579	5849.5	4	376.208	5984.59
386.385	5824.13	4	384.74	5872.95	4	394.274	5831.61	4	537.762	1601.98	1	409.275	6065.31	4	412.744	5844.54	4	431.423	5820.58	4	529.65	1688.69	1	369.533	5785.7	4	385.853	5633.68	4	395.39	5785.32	4	531.008	1670.81	1	371.657	6113.9	4	381.323	6195.1	4	389.335	5874.01	4	363.581	5763.01	4	376.259	6292.89
386.451	5461.37	4	384.772	5668.68	4	394.317	5815.8	4	537.823	1781.2	1	409.318	5859.89	4	412.752	6089.36	4	431.433	5817.32	4	529.673	1792.6	1	369.572	6199.3	4	385.854	5669.56	4	395.411	5769.61	4	531.018	1566.4	1	371.683	6435.28	4	381.326	5987.24	4	389.359	5884.86	4	363.636	5738.63	4	376.283	6085.58
386.465	5788.41	4	384.788	6040.94	4	394.393	5746.48	4	537.876	1734.5	1	409.358	5778.25	4	412.755	5612.39	4	431.49	5679.51	4	529.688	1808.73	1	369.633	5988.69	4	385.868	5873.95	4	395.422	5687.68	4	531.021	1694.62	1	371.727	5900.59	4	381.364	5735.33	4	389.384	6224.83	4	363.644	5697.32	4	376.309	5691.47
386.466	6090.49	4	384.792	5847.36	4	394.402	6096.26	4	537.886	1641.82	1	409.385	5706.68	4	412.791	5902.31	4	431.501	5641.89	4	529.701	1720.41	1	369.635	5883.2	4	385.872	5844.39	4	395.443	5911.91	4	531.053	1669.15	1	371.835	5762.83	4	381.404	5696.2	4	389.413	5849.43	4	363.646	5958.18	4	376.333	5832.89
386.471	5851.83	4	384.815	5799.72	4	394.468	5734.65	4	537.923	1645.21	1	409.512	5663.63	4	412.825	5539.36	4	431.602	6071	4	529.705	1684.76	1	369.648	5586.43	4	385.896	5550.7	4	395.462	6000.87	4	531.061	1661.2	1	371.839	5948.89	4	381.414	5540.53	4	389.458	6025.76	4	363.671	5611.75	4	376.336	5520.19
386.474	5805.22	4	384.826	6276.43	4	394.513	5445.23	4	537.937	1831.28	1	409.53	5603.75	4	412.826	5720.42	4	431.674	5555.26	4	529.709	1556.46	1	369.671	5698.41	4	385.927	5702.38	4	395.487	5782.81	4	531.116	1723.46	1	371.851	6011.48	4	381.425	5925.5	4	389.467	6047.3	4	363.707	6098.78	4	376.362	5709.94
386.498	5780.59	4	384.855	5873.53	4	394.525	5677.47	4	537.938	1610.47	1	409.562	5827.11	4	412.837	5902.19	4	431.731	5763.13	4	529.747	1565.54	1	369.7	5719.27	4	385.976	6008.91	4	395.505	5951.15	4	531.126	1646.94	1	371.888	5942.2	4	381.541	5910.1	4	389.485	5970.28	4	363.777	5578.28	4	376.391	5642.09
386.574	5752.73	4	384.863	5851.23	4	394.529	5876.13	4	537.948	1548.27	1	409.591	5660.63	4	412.972	5600.52	4	431.738	5570.37	4	529.753	1558.42	1	369.739	5734.83	4	385.994	5672.19	4	395.506	5749.42	4	531.161	1594.11	1	371.9	6282.26	4	381.57	5621.33	4	389.512	5793.15	4	363.823	6077.1	4	376.399	6089.51
386.588	5726.9	4	384.94	5765	4	394.536	5706.37	4	537.959	1640.26	1	409.617	5682.22	4	413	5797.55	4	431.783	5725.86	4	529.765	1648.49	1	369.741	5758.27	4	385.995	6312.88	4	395.513	5786.13	4	531.175	1704.76	1	371.902	5872.23	4	381.577	5731.87	4	389.574	5834.65	4	363.877	5615.62	4	376.411	5663.57
386.617	5660.81	4	384.988	5667.18	4	394.587	5581.59	4	537.968	1681.38	1	409.69	5809.23	4	413.121	6143.64	4	431.851	5532.24	4	529.771	1643.95	1	369.742	5796.2	4	386.047	5667.98	4	395.612	5751.62	4	531.181	1785.36	1	371.921	6194.59	4	381.588	5445.75	4	389.581	5963.32	4	363.915	5747.91	4	376.424	5459.1
386.636	5757.03	4	385.008	5580.53	4	394.664	5696.89	4	537.99	1653.65	1	409.751	5625.19	4	413.248	5671.47	4	431.905	5698.04	4	529.788	1677.18	1	369.831	5716.53	4	386.048	5723.39	4	395.619	6228.75	4	531.206	1570.95	1	371.928	5942.98	4	381.599	5967.79	4	389.584	5840.25	4	363.929	6083.26	4	376.433	5588.43
386.645	5962.07	4	385.009	5655.73	4	394.683	5757.91	4	538.004	1656.91	1	409.89	5935.55	4	413.303	5710.2	4	431.913	5677.45	4	529.843	1693.36	1	369.846	6000.36	4	386.073	5655.91	4	395.642	6035.79	4	531.21	1577.02	1	372.046	5839.49	4	381.636	5668.39	4	389.664	5946.9	4	363.973	5872.19	4	376.449	5719.17
386.682	5837.91	4	385.034	5653.09	4	394.684	5818.16	4	538.048	1668.19	1	409.937	5768.26	4	413.368	5657.59	4	431.917	5579.09	4	529.86	1659.01	1	369.862	5896.84	4	386.087	5780.97	4	395.649	5630.14	4	531.227	1599.3	1	372.05	6346.79	4	381.637	5731.13	4	389.665	5682.7	4	364.012	5954.81	4	376.454	5645.47
386.708	5633.78	4	385.062	5692.46	4	394.693	6058.06	4	538.067	1504.63	1	409.963	5939.83	4	413.513	6103.15	4	432.101	5678.17	4	529.885	1679.87	1	369.915	5561.48	4	386.091	6239.95	4	395.669	5785.99	4	531.274	1547.58	1	372.053	6096.48	4	381.649	6338.75	4	389.674	5889.17	4	364.03	5785.87	4	376.553	6200.63
386.752	5665	4	385.103	5676.78	4	394.703	5809.93	4	538.094	1847.48	1	409.997	5856.65	4	413.516	5801.03	4	432.145	6069.46	4	529.897	1707.45	1	369.993	5868.41	4	386.095	6107.76	4	395.673	6147.99	4	531.333	1590.34	1	372.099	5732.84	4	381.67	5729.19	4	389.678	5757.28	4	364.04	5755.02	4	376.575	5852.91
386.771	6062.16	4	385.134	5633.36	4	394.721	5744.02	4	538.121	1663.94	1	410.084	5664.79	4	413.529	5932.61	4	432.223	5831.85	4	529.918	1679.35	1	370.092	6040.83	4	386.11	5900.37	4	395.677	5782.62	4	531.342	1725	1	372.141	5605.42	4	381.717	6213.22	4	389.683	5617.08	4	364.131	5800.76	4	376.599	5590.73
386.801	5586.22	4	385.141	5797.35	4	394.729	5546.19	4	538.149	1596.38	1	410.17	5729.06	4	413.597	5949.07	4	432.277	5745.69	4	529.923	1689.19	1	370.095	6007.85	4	386.122	5721.39	4	395.692	6038.57	4	531.37	1583.01	1	372.145	5568.23	4	381.779	5714.78	4	389.7	5659.74	4	364.144	5781.38	4	376.633	6050.11
386.827	5690.04	4	385.186	5697.97	4	394.73	5722.14	4	538.153	1682.11	1	410.182	5747.58	4	413.622	5816.61	4	432.281	5607.16	4	529.953	1648.63	1	370.245	5747.17	4	386.125	5524.42	4	395.742	5820.78	4	531.388	1648.83	1	372.162	6009.13	4	381.973	5763.56	4	389.746	5841.52	4	364.15	5918.98	4	376.678	5727.3
386.936	5639.66	4	385.294	5735.42	4	394.731	6305.47	4	538.175	1586.73	1	410.192	5664.53	4	413.667	6099.77	4	432.309	5908.19	4	529.976	1592.85	1	370.285	5997.69	4	386.149	5963.59	4	395.745	5911.09	4	531.391	1614.73	1	372.181	5986.54	4	381.991	6147.95	4	389.748	5625.91	4	364.161	5960.25	4	376.705	6035.16
386.945	5614.35	4	385.316	5590.89	4	394.812	5613.03	4	538.23	1596.05	1	410.36	5680.71	4	413.712	5746.51	4	432.336	5862.7	4	529.981	1828.19	1	370.334	5660.24	4	386.163	5544.5	4	395.795	5684.45	4	531.406	1671.35	1	372.211	6347.2	4	382.001	5723.74	4	389.755	5836.71	4	364.172	5507.88	4	376.768	5565.06
387.03	5784.17	4	385.371	5673.25	4	394.849	5753.33	4	538.271	1632.06	1	410.422	5363.25	4	413.748	5869.97	4	432.387	6013.77	4	530.001	1554.07	1	370.336	5744.35	4	386.172	5742.34	4	395.882	5705.84	4	531.505	1657.84	1	372.267	5871.1	4	382.036	5858.84	4	389.766	5615.97	4	364.223	5676.9	4	376.913	5716.99
387.071	5617.34	4	385.397	5657.42	4	394.875	5654.05	4	538.273	1606.2	1	410.49	5690.87	4	413.772	5837.31	4	432.483	5583.95	4	530.014	1640.37	1	370.354	5795.59	4	386.213	5502.74	4	395.898	5839.48	4	531.524	1642.38	1	372.273	6018.73	4	382.039	6232.15	4	389.775	6117.83	4	364.224	5840.67	4	376.924	5805.62
387.084	6227.06	4	385.404	5779.69	4	394.886	5854.54	4	538.276	1659.08	1	410.499	5642.94	4	413.814	5684.82	4	432.528	5816.72	4	530.027	1775.36	1	370.392	5886.33	4	386.308	5851.44	4	396.007	5757.09	4	531.558	1583.63	1	372.276	5915.16	4	382.074	5949.79	4	389.793	5574.29	4	364.23	5719.89	4	376.979	5574.92
387.116	5751.47	4	385.448	6163.09	4	394.924	5714.2	4	538.277	1700	1	410.56	5523.34	4	413.869	5787.2	4	432.552	5815.94	4	530.094	1606.33	1	370.399	5986.18	4	386.309	5883.87	4	396.01	5624.58	4	531.569	1544.44	1	372.308	5736.57	4	382.109	5399.89	4	389.803	5617.31	4	364.261	5653.01	4	377.095	5399.99
387.14	5561.57	4	385.481	5701.1	4	394.966	6043.78	4	538.298	1668.52	1	410.562	5833.44	4	413.873	6093.8	4	432.569	5834.32	4	530.111	1707	1	370.443	5578.22	4	386.372	5722.82	4	396.015	5921.38	4	531.606	1589.75	1	372.32	5874.54	4	382.111	5653.65	4	389.808	5967.82	4	364.294	5892.82	4	377.119	5602.46
387.215	5723.71	4	385.494	5724.92	4	394.984	5701.1	4	538.342	1820.08	1	410.582	5609.35	4	413.874	5715.5	4	432.576	5649.11	4	530.13	1628.8	1	370.455	5633.14	4	386.389	5916.44	4	396.056	5904.21	4	531.617	1630.32	1	372.34	5844.38	4	382.125	6054.32	4	389.81	5823.56	4	364.301	5700	4	377.135	5880.48
387.229	6057.51	4	385.548	6014.65	4	395.002	6107.54	4	538.348	1716.09	1	410.617	5975.99	4	413.897	5811.49	4	432.584	5769.58	4	530.149	1599.6	1	370.538	5762.77	4	386.418	6085.25	4	396.089	5812.58	4	531.691	1625.16	1	372.378	5631.48	4	382.146	5717.6	4	389.839	5915.82	4	364.373	6064.5	4	377.138	5936.09
387.234	5685.73	4	385.567	5952.68	4	395.01	5735.32	4	538.351	1706.6	1	410.621	5720.08	4	413.91	6096.78	4	432.598	5881.26	4	530.166	1643.93	1	370.555	5795.75	4	386.438	5571.66	4	396.124	5812.97	4	531.729	1647.99	1	372.392	5805.38	4	382.167	6262.63	4	389.886	6183.05	4	364.385	5771.14	4	377.174	5919.78
387.27	5914.05	4	385.596	5813.25	4	395.035	5665.03	4	538.355	1654.93	1	410.662	5535.29	4	413.92	5612.23	4	432.602	5883.24	4	530.184	1577.51	1	370.573	5696.94	4	386.551	6136.2	4	396.14	6009.12	4	531.74	1689.58	1	372.4	5638.53	4	382.231	5689.94	4	389.891	5714.75	4	364.385	5645.82	4	377.192	5653.78
387.303	5744.63	4	385.614	6144.21	4	395.05	5635.1	4	538.383	1512.12	1	410.847	5787.84	4	413.955	5990.42	4	432.604	5695.79	4	530.197	1695.22	1	370.577	5687.77	4	386.56	6480.96	4	396.246	5740.18	4	531.817	1636.59	1	372.414	5957.99	4	382.232	5946.33	4	389.899	5921.92	4	364.399	6025.3	4	377.206	5751.46
387.334	5967.56	4	385.651	5826.36	4	395.079	6224.8	4	538.396	1712.79	1	410.912	5711	4	413.956	6033.07	4	432.778	5748.58	4	530.201	1606.98	1	370.636	6138.1	4	386.571	5625.59	4	396.27	5663.69	4	531.864	1674.93	1	372.42	5467.51	4	382.326	5904.12	4	389.946	5959.18	4	364.404	5468.72	4	377.244	5562.2
387.361	5575.52	4	385.655	6189.47	4	395.114	5758.69	4	538.473	1624.21	1	410.988	5864.97	4	413.962	5920.82	4	432.779	5892.29	4	530.266	1527.37	1	370.673	5662.71	4	386.573	5634.71	4	396.335	5856.75	4	531.875	1596.2	1	372.427	6094.25	4	382.326	5796.51	4	390.02	6082.14	4	364.416	5813.08	4	377.304	5799.85
387.385	5575.61	4	385.662	5656.71	4	395.157	5682.89	4	538.509	1556.79	1	411.005	5641.01	4	413.974	6019.63	4	432.842	5367.62	4	530.293	1653.17	1	370.713	5904.2	4	386.576	5726.38	4	396.451	5756.2	4	531.884	1630.81	1	372.456	5872.98	4	382.374	5575.73	4	390.037	6186.96	4	364.462	5980.72	4	377.435	5626.02
387.435	5806.8	4	385.693	6070.51	4	395.208	5666.51	4	538.514	1655.86	1	411.1	5764.9	4	414.024	5858.96	4	432.996	5503.05	4	530.309	1643.78	1	370.732	6078.57	4	386.583	5663.24	4	396.526	5666.31	4	531.884	1698.44	1	372.461	5700.56	4	382.391	5906.65	4	390.055	5746.12	4	364.534	5875.46	4	377.44	5646.37
387.452	5698.87	4	385.726	5630.47	4	395.26	6189.12	4	538.527	1684.36	1	411.175	5861.5	4	414.036	5744.13	4	433.006	5599.49	4	530.331	1576.25	1	370.786	6112.83	4	386.624	6332.27	4	396.61	5745.13	4	531.889	1541.03	1	372.472	5873.81	4	382.398	6122.92	4	390.087	5641.12	4	364.579	6009.97	4	377.452	5716.53
387.5	6257.31	4	385.758	6048.14	4	395.338	6009.73	4	538.543	1619.14	1	411.31	5720.64	4	414.056	5691.03	4	433.051	5908.94	4	530.335	1568.24	1	370.794	5828.32	4	386.655	6042.61	4	396.628	5755.34	4	531.891	1671.84	1	372.473	5731.16	4	382.418	5565.35	4	390.095	5935.48	4	364.607	5515.26	4	377.481	5698.33
387.572	5701.13	4	385.793	6218.96	4	395.374	5956.54	4	538.575	1599.57	1	411.372	5687.99	4	414.081	6157.46	4	433.166	5993.48	4	530.377	1664.85	1	370.798	5812.73	4	386.672	5568.73	4	396.684	6220.25	4	531.903	1604.43	1	372.475	5811.66	4	382.422	5596.84	4	390.108	5754.08	4	364.625	5645.43	4	377.494	5585.36
387.696	5583.23	4	385.797	6247.66	4	395.378	5775.17	4	538.598	1637.38	1	411.399	5832.06	4	414.146	5762.91	4	433.175	5658.15	4	530.378	1771	1	370.802	5842.96	4	386.691	5970.79	4	396.723	5840.96	4	531.918	1604.59	1	372.553	5674.5	4	382.424	5722.56	4	390.167	5854.87	4	364.689	5724.92	4	377.498	5457.66
387.703	6142.64	4	385.816	5897.61	4	395.416	6018.79	4	538.601	1622.09	1	411.436	5739.44	4	414.154	5750.26	4	433.188	5917.49	4	530.384	1606.02	1	370.823	5949.85	4	386.698	5618.25	4	396.745	6134.27	4	531.927	1732.32	1	372.569	5709.09	4	382.432	5851.93	4	390.225	5832.68	4	364.705	5948.69	4	377.516	5825.09
387.734	5359.11	4	385.819	5911.27	4	395.422	5579.39	4	538.648	1719.2	1	411.457	5950.27	4	414.238	5447.69	4	433.21	5917.73	4	530.462	1626.78	1	370.836	5810.55	4	386.73	5685.33	4	396.748	5740.42	4	531.934	1547.15	1	372.57	6019.04	4	382.433	5905.67	4	390.231	5535.23	4	364.715	5587.69	4	377.541	5684.07
387.782	5617.7	4	385.866	6074.35	4	395.482	5714.83	4	538.652	1561.28	1	411.46	5601.29	4	414.273	5733.99	4	433.269	5560.56	4	530.463	1665.77	1	370.852	5838.19	4	386.738	5771.91	4	396.783	5721.76	4	531.959	1634.33	1	372.573	5419.18	4	382.485	5712.55	4	390.237	5950.74	4	364.725	5523.8	4	377.65	5605.85
387.805	5858.46	4	385.871	5939.54	4	395.498	6184.95	4	538.67	1629.89	1	411.465	5737.68	4	414.298	5791.21	4	433.292	5844.27	4	530.487	1661.8	1	370.859	6041.57	4	386.752	5897.01	4	396.869	5987.04	4	531.975	1649.53	1	372.573	5870.4	4	382.511	5497.87	4	390.273	5736.66	4	364.769	5814.8	4	377.677	5979.77
387.844	5618.05	4	385.922	5758.66	4	395.503	6036.31	4	538.701	1658.66	1	411.479	5928.14	4	414.348	5676.79	4	433.345	6013.14	4	530.497	1781.65	1	370.876	6322.68	4	386.856	5793.68	4	396.874	5680.64	4	531.976	1596.24	1	372.577	5787.36	4	382.512	5717.9	4	390.278	5749.11	4	364.793	6006.3	4	377.779	5972.96
387.874	5765.83	4	385.94	5863.82	4	395.512	5688.85	4	538.722	1635.1	1	411.483	5774.96	4	414.373	6114.22	4	433.53	5866.72	4	530.506	1665.87	1	370.878	5850.47	4	386.876	6195.94	4	396.936	5868.54	4	531.995	1621.57	1	372.582	5848.84	4	382.534	5707.72	4	390.287	5538.64	4	364.952	5910.7	4	377.788	5758.82
387.917	5746.05	4	385.965	5530.1	4	395.552	5976.41	4	538.758	1630.22	1	411.501	5813.3	4	414.375	5648.38	4	433.601	5672.29	4	530.537	1560.55	1	370.884	6042.76	4	386.902	5972.87	4	396.952	5794.61	4	531.998	1649.94	1	372.604	5887.13	4	382.537	5828.65	4	390.313	5608	4	364.981	5878.18	4	377.809	5813.48
388.081	5802.81	4	385.974	5526.7	4	395.571	5608.73	4	538.771	1746.02	1	411.604	5846.75	4	414.441	5711.63	4	433.66	5519.68	4	530.543	1692.96	1	370.934	5785.27	4	386.924	5663.54	4	397.044	5719.08	4	531.999	1612.25	1	372.616	6050.03	4	382.663	5593.09	4	390.356	5626.12	4	364.983	5731	4	377.847	5642.02
388.111	5530.89	4	386.039	5850.33	4	395.596	5955.45	4	538.776	1615.05	1	411.642	6050.05	4	414.446	5702.83	4	433.679	5775.24	4	530.545	1681.46	1	370.941	5635.07	4	386.941	5640.63	4	397.048	6103.58	4	532.007	1657.37	1	372.706	5941.37	4	382.691	5692.92	4	390.384	5968.07	4	364.986	6069.08	4	377.877	5568.34
388.157	5745.35	4	386.072	5644.62	4	395.626	5793.52	4	538.787	1603.04	1	411.664	5614.89	4	414.473	5600.33	4	433.68	5583.43	4	530.62	1711.56	1	370.944	5683.67	4	386.945	5679.86	4	397.07	5823.41	4	532.012	1670.1	1	372.707	5780.7	4	382.7	5715.39	4	390.413	6063.74	4	365.005	5702.6	4	377.883	5562.85
388.161	5616.81	4	386.114	5817.68	4	395.636	5819.04	4	538.889	1530.04	1	411.702	5823.32	4	414.565	6367.81	4	433.835	6022.49	4	530.643	1720.6	1	370.964	5825.08	4	386.979	5578.4	4	397.099	5934.85	4	532.019	1673.61	1	372.74	5892.77	4	382.744	5868.29	4	390.422	5683.25	4	365.005	6115.72	4	377.901	5977.99
388.182	5738.7	4	386.138	5799.21	4	395.649	5824.66	4	538.899	1738.72	1	411.747	5878.63	4	414.66	5635.07	4	433.862	5831.67	4	530.682	1622.52	1	370.984	5498.31	4	386.979	5566.76	4	397.121	5858.53	4	532.023	1602.4	1	372.755	5679.05	4	382.752	5943.44	4	390.432	5970.05	4	365.018	5873.78	4	377.962	6152.94
388.212	5645.3	4	386.164	5664.83	4	395.653	5565.75	4	538.997	1604.13	1	411.756	5571.89	4	414.708	5735.31	4	434.007	5698.22	4	530.697	1524.23	1	371.004	5846	4	387.019	5841.07	4	397.135	5681.14	4	532.059	1663.46	1	372.774	5953.29	4	382.763	5603.22	4	390.456	5768.22	4	365.022	6113.44	4	377.969	5875.55
388.303	5620.92	4	386.181	5693.82	4	395.662	5922.94	4	539.005	1615.48	1	411.767	5564.95	4	414.724	5725	4	434.072	5786.39	4	530.747	1610.2	1	371.019	5830.41	4	387.128	5771.88	4	397.183	5674.01	4	532.079	1643.46	1	372.833	5964.91	4	382.825	6041.29	4	390.523	5936.75	4	365.031	5780.45	4	378.051	5681.33
388.341	6031.54	4	386.209	5517.51	4	395.664	5642.45	4	539.019	1759.35	1	411.778	5283.12	4	414.728	5658.57	4	434.086	5827.17	4	530.752	1629.55	1	371.054	5822.57	4	387.143	5726.88	4	397.187	6222.29	4	532.105	1588.39	1	372.834	6159.21	4	382.857	5849.26	4	390.548	5613.28	4	365.09	5741.52	4	378.066	5602.97
388.35	5624.68	4	386.259	5616.35	4	395.737	6076.86	4	539.078	1604.55	1	411.78	5534.05	4	414.734	5571.02	4	434.133	6221.17	4	530.758	1622.18	1	371.066	5674.94	4	387.152	6114.06	4	397.237	5771.93	4	532.111	1652.96	1	372.852	5876.85	4	382.866	5623.92	4	390.578	6194.61	4	365.141	5544.84	4	378.082	5593.94
388.433	5879.56	4	386.301	5674.64	4	395.751	5679.84	4	539.106	1619.21	1	411.822	5767.45	4	414.749	5623.25	4	434.134	5608.57	4	530.766	1595.47	1	371.092	6342.84	4	387.162	5902.92	4	397.238	5664.42	4	532.111	1651.78	1	372.879	5618.13	4	382.884	5733.72	4	390.616	5923.26	4	365.176	5746.69	4	378.105	5754.02
388.478	5687.58	4	386.339	6128.18	4	395.788	5558.82	4	539.11	1715.93	1	411.847	5676.04	4	414.777	5570.62	4	434.147	5935.76	4	530.785	1675.68	1	371.115	5876.73	4	387.227	6039.07	4	397.278	5776.89	4	532.129	1578.06	1	372.901	5805.07	4	382.899	6008.06	4	390.628	5867.27	4	365.216	5726.61	4	378.136	5769.93
388.509	5947.95	4	386.391	5572.69	4	395.788	5597.42	4	539.113	1614.09	1	411.991	5812.86	4	414.851	5688.51	4	434.166	5811.31	4	530.848	1589.46	1	371.129	5689.37	4	387.233	5735.95	4	397.39	5817.93	4	532.177	1591.22	1	372.916	5804.65	4	382.902	6058.3	4	390.646	5799.19	4	365.234	5688.69	4	378.154	5554.84
388.519	5689.59	4	386.396	5620.34	4	395.814	5939.92	4	539.13	1629.38	1	411.995	5487.89	4	414.88	5496.77	4	434.257	5884.77	4	530.854	1702.85	1	371.184	5970.11	4	387.257	5529.83	4	397.391	5994.11	4	532.231	1611.47	1	372.928	6131.15	4	382.98	5776.59	4	390.662	5898.71	4	365.237	5695.71	4	378.21	5683.24
388.549	5703.48	4	386.442	5726.67	4	395.926	5322.85	4	539.162	1718.77	1	412.04	5700.3	4	414.885	5606.86	4	434.31	5577.84	4	530.887	1575.04	1	371.186	6005.57	4	387.323	5712.13	4	397.418	6221.2	4	532.236	1607.72	1	372.975	5778.02	4	382.984	6156.02	4	390.677	5716.81	4	365.244	5582.12	4	378.252	5795.39
388.557	5926.84	4	386.485	6112.86	4	395.93	5734.36	4	539.224	1501.38	1	412.062	6040.82	4	414.941	5690.35	4	434.329	5657.97	4	530.898	1697.3	1	371.207	5398.79	4	387.326	5986.2	4	397.463	5752.2	4	532.259	1536.65	1	373.028	5778.54	4	382.99	5609.62	4	390.708	5814.56	4	365.247	5638.45	4	378.257	5647.06
388.593	5552.62	4	386.511	5728.06	4	395.959	5741.24	4	539.243	1637.32	1	412.083	6045.26	4	415.095	5458.14	4	434.401	5599.73	4	530.92	1685.21	1	371.233	5901.4	4	387.376	5760.04	4	397.527	5766.19	4	532.265	1627.14	1	373.03	5754.14	4	383.077	5446.9	4	390.74	6041.65	4	365.271	5983.93	4	378.271	5652.76
388.599	5573.13	4	386.518	5729.26	4	395.989	5937.78	4	539.292	1623.36	1	412.208	5555.55	4	415.097	5419.1	4	434.487	6027.62	4	530.947	1622.65	1	371.235	5694.11	4	387.378	5640.64	4	397.536	6229.75	4	532.268	1694.9	1	373.04	5705.35	4	383.088	5768.85	4	390.772	5978.78	4	365.334	5685.73	4	378.291	5737.32
388.605	5918.36	4	386.535	6005.07	4	396.012	5640.98	4	539.309	1759.84	1	412.254	5562.53	4	415.111	5460.78	4	434.5	5606.87	4	530.978	1682.44	1	371.252	5681.24	4	387.406	5749.3	4	397.555	5717.71	4	532.272	1625.89	1	373.103	5687.99	4	383.113	5843.39	4	390.809	5700.28	4	365.36	5794.37	4	378.312	5772.45
388.608	5668.91	4	386.538	5767.64	4	396.027	5316.89	4	539.325	1511.08	1	412.288	6099.28	4	415.147	5629.46	4	434.572	5747.08	4	531.027	1668.25	1	371.278	6187.52	4	387.487	5806.34	4	397.581	5849.06	4	532.291	1655.68	1	373.103	6148.06	4	383.123	6051.68	4	390.853	5685.37	4	365.463	5848.7	4	378.318	5666.84
388.631	6128.7	4	386.54	5781.77	4	396.124	5974.33	4	539.364	1588.18	1	412.294	5689.8	4	415.152	5783.28	4	434.601	5807.22	4	531.027	1602.59	1	371.291	5599	4	387.593	5821.92	4	397.584	5693.29	4	532.294	1567.24	1	373.103	5854.48	4	383.206	5830.54	4	390.884	6237.32	4	365.466	5772.3	4	378.339	6008.84
388.636	5739.96	4	386.542	6056.5	4	396.125	6167.01	4	539.381	1729.01	1	412.329	5547.32	4	415.206	5753.62	4	434.691	5654.31	4	531.074	1654.28	1	371.296	5897.01	4	387.601	5915.94	4	397.618	5673.76	4	532.36	1737.89	1	373.142	5752.56	4	383.237	5825.35	4	390.921	5696.59	4	365.486	5912.4	4	378.344	6025.95
388.648	6094.86	4	386.553	5748.68	4	396.129	5676.82	4	539.403	1501.44	1	412.357	5813.55	4	415.214	6080.47	4	434.728	5650.55	4	531.079	1560.78	1	371.305	5939.77	4	387.607	5704.27	4	397.629	6093.54	4	532.385	1635.44	1	373.147	5901.84	4	383.249	6145.94	4	390.956	6036.34	4	365.583	5680.95	4	378.371	5766.91
388.713	5544.83	4	386.623	5951.2	4	396.138	5699.03	4	539.415	1670.63	1	412.481	5793.26	4	415.301	5589.9	4	434.788	5667.65	4	531.114	1631.86	1	371.311	5974.08	4	387.608	5514.19	4	397.632	5926.63	4	532.396	1838.08	1	373.147	6333.87	4	383.262	5705.59	4	390.99	5936.18	4	365.673	5906.34	4	378.436	5992.91
388.733	6162.7	4	386.626	5417.73	4	396.231	6339.28	4	539.42	1589.15	1	412.504	5877.2	4	415.317	5672.67	4	434.807	5735.86	4	531.124	1736.13	1	371.319	5824.78	4	387.707	5586.44	4	397.641	5843.38	4	532.41	1610.95	1	373.162	5812.77	4	383.266	5695.95	4	391.022	5705.36	4	365.691	5667.15	4	378.472	5767.64
388.775	6004.87	4	386.627	5767.39	4	396.247	5754.8	4	539.441	1581.58	1	412.518	5767.36	4	415.408	5937.92	4	434.81	5769.44	4	531.133	1570.56	1	371.358	5875.34	4	387.712	5772.32	4	397.653	6075.45	4	532.466	1756.39	1	373.208	6201.44	4	383.274	5726.41	4	391.08	5786.71	4	365.704	5803.55	4	378.544	6100.18
388.853	5794.43	4	386.64	5915.37	4	396.369	5816.43	4	539.457	1675.94	1	412.565	5620.5	4	415.496	6161.34	4	434.927	5705.98	4	531.16	1585.55	1	371.381	5649.88	4	387.728	6124.2	4	397.665	5756.79	4	532.468	1672.98	1	373.309	5810.86	4	383.28	5703.58	4	391.096	6174.82	4	365.837	5670.2	4	378.551	5863.56
388.879	5913.94	4	386.658	5709.38	4	396.376	5442.99	4	539.479	1603.25	1	412.628	5618.61	4	415.564	5561.55	4	434.945	5810.05	4	531.168	1712.51	1	371.412	5553.85	4	387.731	5608.32	4	397.666	5683.63	4	532.491	1625.83	1	373.314	5819.37	4	383.35	6144.75	4	391.128	5669.36	4	365.892	5772.31	4	378.573	5609.33
388.908	5702.83	4	386.703	5849.69	4	396.378	5744.72	4	539.483	1670.12	1	412.638	5979	4	415.627	5681.46	4	434.949	6153.36	4	531.171	1654.16	1	371.438	5927.43	4	387.792	5760.22	4	397.677	5629	4	532.518	1668.41	1	373.326	6136.09	4	383.36	5977.29	4	391.142	5832.1	4	365.927	6178.19	4	378.583	5711.01
388.984	5586.55	4	386.71	5764.33	4	396.391	5947.57	4	539.499	1515.51	1	412.667	5649.08	4	415.628	5586.49	4	434.965	5969.59	4	531.185	1587.64	1	371.44	5808.51	4	387.839	6328.92	4	397.744	6290.4	4	532.528	1602.36	1	373.353	5527.45	4	383.391	5571.5	4	391.146	5885.08	4	365.928	5857.85	4	378.59	6059.41
389.016	6277.01	4	386.773	5781.03	4	396.49	5729.21	4	539.531	1842.87	1	412.74	5750.11	4	415.662	5515.15	4	434.976	5550.24	4	531.186	1573.67	1	371.467	5900.31	4	387.883	5866.31	4	397.754	5748.82	4	532.529	1506	1	373.388	5893.63	4	383.52	5631.73	4	391.174	5693.34	4	365.942	5620.95	4	378.633	6216.79
389.026	5607.2	4	386.777	5895.74	4	396.525	5595	4	539.542	1688.7	1	412.838	5738.16	4	415.71	5470.1	4	434.977	5795.84	4	531.338	1666.55	1	371.472	5842.34	4	387.884	5871.42	4	397.798	5686.72	4	532.537	1765.28	1	373.426	5642.37	4	383.535	5572.64	4	391.232	5683.93	4	365.958	5721.11	4	378.702	5942.09
389.093	5849.57	4	386.823	5972.33	4	396.539	5770.86	4	539.566	1726.11	1	413.012	5905.65	4	415.746	5638.18	4	434.981	5785.26	4	531.358	1702.32	1	371.495	5924.61	4	387.885	5697.78	4	397.807	5955.48	4	532.539	1697.87	1	373.447	5777.77	4	383.546	6042.63	4	391.245	5691.73	4	365.971	5565.23	4	378.751	5414.1
389.098	6168.63	4	386.837	5772.58	4	396.548	5635.14	4	539.568	1672.49	1	413.076	5564.88	4	415.791	5730.18	4	435.06	5543.04	4	531.404	1606.34	1	371.526	5828.59	4	387.914	5741.99	4	397.846	5777.44	4	532.621	1756.91	1	373.487	5514.87	4	383.629	5616.62	4	391.252	6044.37	4	365.981	5624.41	4	378.786	5544.96
389.132	6125.39	4	386.848	6268.15	4	396.552	5891.29	4	539.604	1743.92	1	413.297	5759.16	4	415.874	5826.75	4	435.112	5709.03	4	531.427	1673.43	1	371.541	5980.21	4	387.932	5413.88	4	397.922	5890.35	4	532.659	1633.69	1	373.538	5862.6	4	383.649	5982.89	4	391.254	5839.51	4	365.999	5817.55	4	378.789	5702.91
389.134	5718.77	4	386.848	5701.62	4	396.593	6161.15	4	539.687	1676.09	1	413.309	5768.11	4	415.881	5801.61	4	435.168	5669.49	4	531.44	1532.65	1	371.574	5866.9	4	387.99	6226.51	4	397.946	5841.82	4	532.695	1615.53	1	373.54	6045.6	4	383.704	5661.3	4	391.254	5656.13	4	366.025	5778.21	4	378.797	5696.61
389.227	5880.05	4	386.857	5856.37	4	396.624	5637.32	4	539.734	1629.66	1	413.322	5747.08	4	415.92	6207.74	4	435.197	5742.74	4	531.44	1623.26	1	371.58	5721.27	4	388.005	5698.26	4	397.971	5882.08	4	532.697	1634.64	1	373.562	5776.63	4	383.745	5720.66	4	391.267	5712.29	4	366.041	5961.12	4	378.817	5607.51
389.238	5563.45	4	386.86	5677.8	4	396.713	6012.96	4	539.75	1619.58	1	413.338	5671.25	4	415.982	5494.66	4	435.211	6090.88	4	531.483	1608.82	1	371.599	5823.99	4	388.008	5875.01	4	397.99	5469.29	4	532.708	1823.45	1	373.586	6026.45	4	383.82	5629.4	4	391.273	5679.52	4	366.149	5769.4	4	378.849	5479.91
389.24	5673.54	4	386.884	5983.93	4	396.723	6208.06	4	539.786	1527.93	1	413.347	5788.13	4	416.015	5751.45	4	435.301	5506.76	4	531.484	1730.7	1	371.624	5787.52	4	388.017	5851.5	4	398	5924.68	4	532.712	1652.55	1	373.587	5673.32	4	383.868	5651.63	4	391.275	5853.97	4	366.154	5958.95	4	378.897	5854.12
389.255	5531.65	4	386.907	5741.66	4	396.846	5594.46	4	539.849	1616.8	1	413.358	5584.77	4	416.113	5679.93	4	435.355	5622.03	4	531.497	1607.53	1	371.629	5837.43	4	388.021	5617.35	4	398.002	5482.94	4	532.732	1737.81	1	373.593	6082.96	4	383.997	6073.43	4	391.292	6224.59	4	366.19	5759.65	4	378.918	5666.81
389.271	5976.7	4	386.923	5874.76	4	396.863	6182.21	4	539.887	1477.61	1	413.442	5692.06	4	416.162	6060.07	4	435.438	5540.27	4	531.506	1592.25	1	371.642	5855.04	4	388.052	5563.44	4	398.015	5787.49	4	532.733	1639.38	1	373.607	5973.24	4	384.01	5631.57	4	391.293	5771.78	4	366.264	5676.03	4	378.962	5734.14
389.314	6021.64	4	386.967	5736.11	4	396.881	5506.12	4	539.9	1716.4	1	413.512	5509.86	4	416.164	5442.43	4	435.499	5720.89	4	531.537	1605.28	1	371.65	5725.72	4	388.074	6170.08	4	398.029	5749.34	4	532.736	1695.41	1	373.614	5670	4	384.011	5401.23	4	391.295	6086.74	4	366.269	5705.51	4	378.963	5940.25
389.426	5438.03	4	386.975	5943.4	4	396.904	5993.21	4	539.906	1577.62	1	413.551	5770.83	4	416.207	5756.46	4	435.554	5637.93	4	531.547	1652.86	1	371.67	5653.12	4	388.095	5849.56	4	398.047	5565.2	4	532.761	1656.46	1	373.634	6129.46	4	384.026	5951.57	4	391.312	5757.7	4	366.364	5609.3	4	378.978	5495.63
389.45	5988	4	386.983	5864.64	4	396.967	5700.05	4	539.957	1714.6	1	413.557	5567.32	4	416.224	5922.2	4	435.715	5960.32	4	531.553	1704.73	1	371.687	5729.72	4	388.099	5701.06	4	398.077	5559.07	4	532.767	1649.21	1	373.636	5857.11	4	384.029	5902	4	391.325	5679.9	4	366.372	5761.14	4	379.044	5519.23
389.509	5883.32	4	387.066	5852.8	4	397.065	5482.07	4	539.973	1604.43	1	413.711	5771.84	4	416.335	6188.78	4	435.739	5654.78	4	531.554	1597.1	1	371.719	5579.93	4	388.123	6043.99	4	398.133	6050.5	4	532.775	1566.7	1	373.653	5685.58	4	384.035	5669.67	4	391.35	5621.85	4	366.378	5882.7	4	379.047	5803.28
389.554	5926.22	4	387.092	5690.69	4	397.078	5637.9	4	539.995	1632.23	1	413.765	5855.15	4	416.349	5606.56	4	435.84	5526.52	4	531.58	1671.24	1	371.761	5666.44	4	388.127	5856.68	4	398.164	5665.01	4	532.783	1544.04	1	373.705	5833.43	4	384.043	5673.05	4	391.351	6154.13	4	366.407	5730.02	4	379.089	5938.11
389.579	6026.08	4	387.097	5854.1	4	397.097	5711.56	4	540.029	1666.6	1	413.768	6134.51	4	416.392	5581.87	4	435.904	6179.33	4	531.597	1718.76	1	371.799	5573.89	4	388.146	5756.86	4	398.168	6094.33	4	532.788	1718	1	373.714	5846.49	4	384.06	5588.41	4	391.369	6011.06	4	366.42	5836.83	4	379.112	5539.63
389.597	5771.55	4	387.228	5699.87	4	397.183	5731.74	4	540.051	1644.1	1	413.789	5799.87	4	416.52	5685.25	4	435.953	5560.64	4	531.627	1673.06	1	371.851	5798.06	4	388.168	5668.42	4	398.34	5681.45	4	532.853	1618.73	1	373.763	6012.39	4	384.061	5411.99	4	391.468	6299.66	4	366.436	6128.98	4	379.129	6053.64
389.62	5641.03	4	387.233	5881.82	4	397.226	5829.79	4	540.095	1692.64	1	413.823	5758.22	4	416.536	5352.76	4	436.203	5499.4	4	531.628	1681.69	1	371.853	5764.56	4	388.186	5943.56	4	398.359	5744.38	4	532.873	1549.97	1	373.766	5833.63	4	384.076	5634.28	4	391.477	5777.92	4	366.49	5671.6	4	379.164	5812.92
389.631	5502.67	4	387.266	5942.44	4	397.262	5880.52	4	540.121	1829.54	1	413.87	6154.67	4	416.568	5902.53	4	436.373	5717.28	4	531.648	1659.48	1	371.928	6097.68	4	388.216	6001.98	4	398.378	5761.56	4	532.873	1663.55	1	373.928	5884.89	4	384.084	5585.37	4	391.487	5850.17	4	366.491	5777.78	4	379.176	5632.59
389.686	5961.48	4	387.275	5699.59	4	397.266	5580.22	4	540.128	1641.74	1	413.886	5636.53	4	416.709	6291.1	4	436.417	5620.42	4	531.662	1611.29	1	371.962	5863.63	4	388.247	5718.03	4	398.384	5774.14	4	532.889	1661.54	1	374.052	6138.58	4	384.084	5795.3	4	391.505	6056.93	4	366.536	5605.71	4	379.209	6271.72
389.726	5546.08	4	387.281	5880.74	4	397.341	5706.01	4	540.13	1818.37	1	414.086	5782.13	4	416.832	5734.15	4	436.423	6196.03	4	531.708	1718.89	1	371.965	6073.49	4	388.253	5796.63	4	398.465	5847.7	4	532.912	1583.67	1	374.118	5765.69	4	384.131	5577.8	4	391.533	5813.95	4	366.541	5778.55	4	379.239	5520.65
389.774	5617.48	4	387.353	5792.14	4	397.387	5572.11	4	540.163	1591.61	1	414.098	5545.18	4	416.865	5867.04	4	436.432	5844.34	4	531.717	1674.91	1	371.973	5809.2	4	388.261	5753.84	4	398.487	5671.71	4	532.938	1737.83	1	374.131	5553.91	4	384.2	5753.22	4	391.538	6029.19	4	366.543	6207.48	4	379.257	5704.83
389.838	5905.34	4	387.356	6518.32	4	397.397	5585.8	4	540.209	1564.32	1	414.099	5921.7	4	416.901	5648.18	4	436.524	5857.44	4	531.831	1707.27	1	371.993	5724.39	4	388.269	5745.17	4	398.505	5609.41	4	532.956	1581.31	1	374.148	5729.73	4	384.219	6249.69	4	391.613	5800.38	4	366.558	5526.23	4	379.287	5336.9
389.847	6165.09	4	387.361	5692.05	4	397.425	5611.06	4	540.245	1603.13	1	414.151	5774.6	4	416.928	5650.17	4	436.535	5720.61	4	531.838	1580.12	1	372.053	5823.17	4	388.305	6096.85	4	398.517	5978.49	4	532.968	1572.27	1	374.15	5707.87	4	384.272	5653.43	4	391.655	6131.97	4	366.571	5945.73	4	379.318	5767.03
389.931	5856.33	4	387.39	5824.76	4	397.432	5945.96	4	540.25	1619.61	1	414.202	5744.66	4	417.025	5690.04	4	436.551	5723.99	4	531.88	1677.71	1	372.054	5706.12	4	388.361	5760.9	4	398.518	5785.38	4	532.992	1733.48	1	374.177	5987.68	4	384.273	6125.77	4	391.657	5905.82	4	366.59	5602.33	4	379.319	5586.23
389.932	6106.04	4	387.392	5712	4	397.434	5768.72	4	540.263	1556.76	1	414.215	5767.34	4	417.064	5589.61	4	436.556	5434.89	4	531.91	1650.45	1	372.069	5786.66	4	388.366	5661.15	4	398.594	5732.54	4	533.065	1577.9	1	374.238	5852.51	4	384.278	5772.39	4	391.679	5736.82	4	366.591	5625.61	4	379.322	5767.69
389.943	5782.42	4	387.53	5626.55	4	397.445	6197.28	4	540.361	1708.77	1	414.228	5672.63	4	417.123	6166.64	4	436.56	5857.63	4	531.931	1589.45	1	372.106	5317.17	4	388.388	5670.58	4	398.603	6099.7	4	533.085	1611.5	1	374.243	5538.88	4	384.325	5590.37	4	391.72	6283.72	4	366.668	6051.46	4	379.332	5669.09
389.963	5618.23	4	387.565	5739.65	4	397.526	5733.13	4	540.402	1665.65	1	414.322	5719.67	4	417.152	6204.13	4	436.605	5623.54	4	531.996	1630.91	1	372.152	6043.09	4	388.388	6161.48	4	398.604	6091.63	4	533.122	1630.95	1	374.289	6181.45	4	384.358	5559.12	4	391.723	6117.05	4	366.698	5641.29	4	379.376	5701.22
390.029	5930.23	4	387.586	5842.67	4	397.527	5795.2	4	540.429	1675.83	1	414.336	5970.09	4	417.177	5691.52	4	436.617	5632.75	4	532.018	1702.25	1	372.186	6027.34	4	388.4	5861.1	4	398.614	5612.11	4	533.124	1659.73	1	374.33	5622.38	4	384.373	5455.74	4	391.744	5704.4	4	366.703	5716.98	4	379.423	5731.6
390.055	5245.49	4	387.593	6091.02	4	397.557	5657.2	4	540.473	1647.52	1	414.521	5751.08	4	417.179	5989.91	4	436.621	5478.26	4	532.04	1778.68	1	372.217	5759.29	4	388.403	5593.68	4	398.721	5851.15	4	533.135	1545.05	1	374.459	6302.45	4	384.386	6286.23	4	391.745	5892.57	4	366.714	5674.82	4	379.441	5689.52
390.073	5659.95	4	387.596	6325.7	4	397.57	5744.17	4	540.503	1660.26	1	414.546	5928.87	4	417.215	5317.54	4	436.666	5793.2	4	532.066	1623.13	1	372.244	5845.51	4	388.425	5652.93	4	398.73	6280.42	4	533.144	1638.95	1	374.464	6147.47	4	384.398	6436.54	4	391.75	5710.61	4	366.721	5606.78	4	379.529	5714.43
390.092	5717.49	4	387.597	5893.76	4	397.599	5648.58	4	540.537	1627.25	1	414.569	5580.15	4	417.223	5814.01	4	436.733	5709.25	4	532.066	1631.91	1	372.28	5943.23	4	388.44	5642.87	4	398.732	5730.8	4	533.156	1673.11	1	374.521	5878.63	4	384.502	5597.72	4	391.764	5782.82	4	366.799	5738.57	4	379.535	5814.89
390.124	5935.14	4	387.629	5696.19	4	397.662	5908.82	4	540.541	1596.08	1	414.618	5678.33	4	417.297	5871.48	4	436.738	5333.59	4	532.073	1577.79	1	372.305	5628.82	4	388.475	5930.82	4	398.735	5937.7	4	533.185	1555.83	1	374.56	6095.12	4	384.51	5553.1	4	391.77	5882.96	4	366.849	5697.91	4	379.592	5895.39
390.15	5525.53	4	387.634	5788.52	4	397.753	5568.67	4	540.553	1552.8	1	414.646	5831.41	4	417.299	5879.34	4	436.75	6134.8	4	532.119	1617.95	1	372.309	5755.95	4	388.635	6263.49	4	398.745	5477.23	4	533.187	1636.3	1	374.612	5771.17	4	384.52	5448.64	4	391.788	5948.56	4	366.886	5746.65	4	379.603	5691.14
390.243	5760.99	4	387.639	6112.33	4	397.773	5786.13	4	540.57	1859.27	1	414.664	5708.04	4	417.381	5937.22	4	436.791	6091.58	4	532.122	1701.45	1	372.317	5813.7	4	388.637	5682.54	4	398.749	5875.19	4	533.206	1556.62	1	374.627	5765.1	4	384.523	5815.34	4	391.856	5899.88	4	366.888	5795.77	4	379.621	5550.6
390.27	5773.22	4	387.671	5837.71	4	397.809	5938.91	4	540.581	1659.44	1	414.71	5730.76	4	417.444	5658.58	4	436.841	5709.36	4	532.138	1598.07	1	372.324	5591.2	4	388.643	5338.32	4	398.753	5808.77	4	533.21	1671.73	1	374.716	5809.02	4	384.526	5393.67	4	391.901	5894.61	4	366.892	5804.65	4	379.638	6158.75
390.273	5604.35	4	387.688	5797.86	4	397.811	6357.84	4	540.591	1503.37	1	414.805	5598.57	4	417.48	5889.85	4	436.849	5478.93	4	532.153	1601.09	1	372.36	5926.56	4	388.652	5609.22	4	398.755	5678.8	4	533.243	1730.82	1	374.725	5728.92	4	384.528	6231.8	4	391.988	5805.73	4	366.914	5654.41	4	379.651	5787.78
390.396	5955.43	4	387.703	5927.07	4	397.816	5741.16	4	540.611	1582.28	1	414.825	5762.9	4	417.481	5769.73	4	436.878	5718.22	4	532.161	1613.41	1	372.371	6238.53	4	388.664	5868.88	4	398.756	5684.33	4	533.247	1680.96	1	374.785	5834.43	4	384.546	5606.55	4	391.995	6137.65	4	366.941	5493.82	4	379.654	6087.84
390.404	5911.14	4	387.711	6262.17	4	397.819	5763.57	4	540.616	1578.6	1	414.856	5559.14	4	417.536	5598.4	4	436.955	5480.31	4	532.199	1692.76	1	372.428	5641.36	4	388.685	5849.51	4	398.786	6081	4	533.257	1558.67	1	374.849	5652.05	4	384.561	5995.95	4	391.998	5885.57	4	366.968	6087.9	4	379.672	5735.23
390.48	5775.17	4	387.777	5842.48	4	397.877	5816.82	4	540.634	1604.72	1	414.901	5812.21	4	417.54	5635.2	4	436.97	5699.76	4	532.2	1683.82	1	372.453	5706.57	4	388.701	5440.73	4	398.846	5754.39	4	533.292	1722	1	374.892	5779.32	4	384.566	5578.77	4	392.039	6181.84	4	366.996	5854.28	4	379.691	5744.88
390.5	5829.2	4	387.836	6135.83	4	397.944	5809.34	4	540.653	1793.94	1	414.99	5562.87	4	417.576	5548.12	4	437.045	5614.65	4	532.217	1825.09	1	372.538	5796.44	4	388.718	5910.6	4	398.854	5659.78	4	533.306	1568.54	1	374.938	5827.58	4	384.589	6247.56	4	392.043	6072.25	4	367.02	5667.96	4	379.711	5820.38
390.504	5707.65	4	387.839	5873.24	4	397.975	5657.69	4	540.653	1652.15	1	415.177	5804.72	4	417.613	5690.59	4	437.058	5280.08	4	532.259	1607.04	1	372.539	5958.28	4	388.726	5932.32	4	398.986	5752.56	4	533.342	1768.78	1	374.944	6156.53	4	384.663	5544.57	4	392.048	5645.63	4	367.082	5722.41	4	379.748	6044.02
390.522	5919.36	4	387.905	5667.98	4	397.985	5824.78	4	540.668	1657.85	1	415.22	5707.05	4	417.644	5493.15	4	437.061	5592.41	4	532.263	1613.4	1	372.559	6124.02	4	388.756	5784.17	4	399.057	6242.29	4	533.357	1758.17	1	374.96	5767.88	4	384.684	5561.9	4	392.05	6146.42	4	367.18	5664.76	4	379.776	5810.41
390.588	5653.76	4	387.94	5991.02	4	398.011	6016.07	4	540.686	1619.29	1	415.269	5939.5	4	417.68	5516.73	4	437.148	5877.29	4	532.272	1611	1	372.59	5636.46	4	388.781	5688	4	399.101	5865.9	4	533.364	1593.66	1	375.005	5507.29	4	384.721	5703.84	4	392.056	5615.42	4	367.193	5781.68	4	379.795	5780.07
390.597	5602.13	4	387.974	5827.96	4	398.026	5733.07	4	540.686	1562.46	1	415.385	5718.81	4	417.852	5827.02	4	437.203	5683.33	4	532.273	1577.56	1	372.73	5797.1	4	388.804	6066.76	4	399.104	5763.84	4	533.413	1548.89	1	375.084	5888.35	4	384.75	5989.56	4	392.057	6147.35	4	367.209	5585.37	4	379.798	5678.92
390.634	5800.94	4	387.977	5839.42	4	398.054	5944.01	4	540.704	1623.33	1	415.425	5596.95	4	417.886	5867.78	4	437.21	5635.7	4	532.279	1564.17	1	372.745	6100.98	4	388.846	6071.5	4	399.125	5651.65	4	533.421	1584.33	1	375.096	5926.29	4	384.812	5775.17	4	392.079	5643.05	4	367.228	5864.48	4	379.829	5712.02
390.674	5586.02	4	388.001	5466.38	4	398.094	5972.03	4	540.723	1691.25	1	415.524	5821.8	4	417.929	5610.87	4	437.285	5718.65	4	532.294	1612.36	1	372.755	5770.5	4	388.85	6192.28	4	399.127	5612.79	4	533.43	1804.19	1	375.103	5959.41	4	384.821	5708.58	4	392.107	5898.73	4	367.23	5433.55	4	379.841	5719.77
390.674	5958.22	4	388.034	5985.82	4	398.122	5710.27	4	540.746	1850.39	1	415.538	5956.39	4	418.107	5506.04	4	437.288	5662.47	4	532.317	1650.9	1	372.757	5843.63	4	388.897	5686.81	4	399.139	5757.55	4	533.438	1778.86	1	375.157	5824.78	4	384.866	5604.74	4	392.132	5829.49	4	367.263	5845.42	4	379.848	5599.62
390.694	5845.56	4	388.043	5564.76	4	398.124	5668.39	4	540.747	1592.19	1	415.549	5745.95	4	418.191	5985.16	4	437.338	5779.26	4	532.328	1761.41	1	372.758	5872.4	4	388.918	5659.44	4	399.152	5665.68	4	533.448	1615.23	1	375.179	5704.63	4	384.871	5737.66	4	392.139	5731.17	4	367.274	5713.86	4	379.905	5862.9
390.714	5667.66	4	388.061	5641.42	4	398.151	5756.03	4	540.779	1735.2	1	415.578	5899.66	4	418.336	5500.28	4	437.365	5888.33	4	532.352	1652.52	1	372.782	5644.27	4	388.92	5712.9	4	399.193	6013	4	533.492	1657.36	1	375.281	5624.86	4	384.895	5587.06	4	392.149	6081.82	4	367.284	5929.01	4	379.912	5694.91
390.74	5814.48	4	388.137	5583.81	4	398.166	6059.08	4	540.782	1580.28	1	415.647	6033.05	4	418.337	5691.02	4	437.409	5686.46	4	532.353	1665.61	1	372.869	5780.38	4	389.079	5985.09	4	399.255	5644.11	4	533.51	1736.17	1	375.333	5983.56	4	384.91	5933.87	4	392.182	5858.03	4	367.331	5717.56	4	379.914	5631.81
390.757	5643.27	4	388.215	5791.73	4	398.18	5732.91	4	540.819	1698.07	1	415.677	5779.53	4	418.373	5546.72	4	437.447	5460.59	4	532.403	1734.1	1	372.891	5796.51	4	389.112	5823.54	4	399.266	5784.19	4	533.525	1685.67	1	375.352	5530.78	4	384.924	5870.25	4	392.195	6192.85	4	367.341	5639.26	4	379.973	5805.54
390.765	5558.77	4	388.261	5805.59	4	398.192	5852.06	4	540.848	1612.77	1	415.695	5736.49	4	418.441	5565.61	4	437.475	5570.06	4	532.415	1678.07	1	372.895	6001.51	4	389.216	5651.07	4	399.271	5637.5	4	533.546	1679.9	1	375.356	5678.51	4	384.931	5916.93	4	392.208	5877.41	4	367.352	5737.39	4	380.006	6255.35
390.788	5750.94	4	388.264	5717.93	4	398.273	5603.44	4	540.876	1583.26	1	415.905	5880.5	4	418.476	5628.33	4	437.493	5693.56	4	532.444	1705.8	1	372.978	5820.26	4	389.256	5666.23	4	399.291	6021.8	4	533.547	1687.8	1	375.367	5818.76	4	384.957	5744.61	4	392.21	5546.47	4	367.384	5884.64	4	380.049	5575.7
390.837	5732.3	4	388.282	5541.55	4	398.288	5723.49	4	540.887	1584.07	1	415.939	5598.86	4	418.486	5666.64	4	437.604	5789.48	4	532.453	1627.51	1	372.989	5679.68	4	389.262	6067.43	4	399.317	5589.52	4	533.558	1564.52	1	375.425	5849.09	4	384.966	5599.34	4	392.234	5994.82	4	367.403	5690.36	4	380.062	5709.36
390.911	6157.61	4	388.302	5881.24	4	398.328	5643	4	540.899	1710.4	1	415.953	5638.33	4	418.489	5825.37	4	437.615	5681.21	4	532.478	1675.86	1	372.999	5894.9	4	389.273	5576.9	4	399.335	5844.27	4	533.592	1625.49	1	375.49	5791.69	4	384.998	5681.61	4	392.311	5647.71	4	367.417	5794.78	4	380.084	6007.26
390.922	5609.49	4	388.336	5826.19	4	398.338	5910.47	4	540.93	1611.97	1	416.023	5747.42	4	418.507	5742.97	4	437.844	5647.46	4	532.491	1653.56	1	373.003	5821.05	4	389.29	5876.22	4	399.34	5769.29	4	533.603	1744.82	1	375.494	5839.36	4	385.006	5737.6	4	392.329	5699.12	4	367.449	5722.42	4	380.086	5643.38
390.955	5654.58	4	388.38	5802.59	4	398.367	5867.45	4	540.94	1733.44	1	416.053	6135.66	4	418.515	6159.12	4	437.947	5741.89	4	532.516	1581.11	1	373.015	5717.66	4	389.331	5657.05	4	399.37	5650.67	4	533.642	1703.58	1	375.514	6134.54	4	385.032	5826.29	4	392.336	5760.32	4	367.454	6131.83	4	380.108	5757.88
391.117	5912.05	4	388.415	5511.04	4	398.45	5796.74	4	540.949	1608.63	1	416.058	5555.39	4	418.594	5938.99	4	437.953	5564.8	4	532.523	1581.31	1	373.03	5643.28	4	389.354	5877	4	399.384	5509.81	4	533.648	1594.08	1	375.547	5890.55	4	385.038	5944.04	4	392.339	5765.66	4	367.462	5701.4	4	380.126	5908.51
391.132	5754.98	4	388.422	5679.36	4	398.457	5726.02	4	540.968	1703.04	1	416.064	5948.48	4	418.612	5627.45	4	438.128	5661.11	4	532.545	1781.9	1	373.07	5604.9	4	389.363	5601.22	4	399.388	6093.48	4	533.649	1640.37	1	375.586	5705.11	4	385.061	5576.52	4	392.364	5837.64	4	367.487	5491.57	4	380.137	5736.88
391.197	5814.05	4	388.445	5491.56	4	398.458	5644.15	4	540.994	1597.14	1	416.073	5619.62	4	418.661	5584.38	4	438.147	6183.15	4	532.55	1602.71	1	373.107	5865.69	4	389.383	5730.69	4	399.389	6108.53	4	533.667	1519.52	1	375.628	5853.32	4	385.231	5964.47	4	392.373	5826.93	4	367.493	5679.83	4	380.204	5523.36
391.217	5899.72	4	388.521	5818.88	4	398.475	5932.11	4	541.035	1586.5	1	416.091	5845.39	4	418.674	5768.42	4	438.174	6101.07	4	532.59	1593.63	1	373.108	5911.29	4	389.386	6045.8	4	399.405	6000.88	4	533.69	1655.19	1	375.647	6047.07	4	385.238	5676.64	4	392.384	6200.66	4	367.509	5516.57	4	380.213	5936.21
391.258	5861.72	4	388.558	5421.79	4	398.509	5906.15	4	541.043	1618.31	1	416.194	5884.82	4	418.682	5564.81	4	438.181	5551.65	4	532.608	1704.3	1	373.12	5688.63	4	389.522	5779.64	4	399.435	5745.14	4	533.727	1626.4	1	375.655	5893.42	4	385.242	5495.15	4	392.395	6096.73	4	367.515	5865	4	380.238	5896.22
391.295	5484.26	4	388.577	5540.88	4	398.536	6171.36	4	541.085	1638.63	1	416.261	5859.14	4	418.686	5586.18	4	438.183	6076.61	4	532.645	1650.76	1	373.127	6435.44	4	389.668	6072.46	4	399.489	5636.38	4	533.755	1580.4	1	375.668	5832.95	4	385.245	5718.2	4	392.426	6179.76	4	367.539	5654.06	4	380.297	5648.49
391.314	5909.52	4	388.58	5934.59	4	398.584	5701.13	4	541.211	1695.45	1	416.277	6158.28	4	418.7	5965.89	4	438.425	5587.39	4	532.712	1629.18	1	373.16	5884.65	4	389.755	5680.23	4	399.547	5772.49	4	533.768	1710.91	1	375.68	5918.66	4	385.322	5766.67	4	392.442	5586.68	4	367.577	6041	4	380.331	5669.89
391.364	5963.44	4	388.59	5823.95	4	398.592	5642.6	4	541.221	1645.25	1	416.31	5696.6	4	418.722	5675.59	4	438.458	5635.55	4	532.712	1579.69	1	373.178	5651.89	4	389.769	6030.43	4	399.553	5706.67	4	533.798	1603.92	1	375.713	5730.25	4	385.354	5667.26	4	392.474	5434.52	4	367.62	5984.27	4	380.366	5592.83
391.44	5562.63	4	388.61	5535.95	4	398.595	5793.04	4	541.246	1631.34	1	416.372	5640.6	4	418.735	5682.92	4	438.543	5549.69	4	532.748	1610.76	1	373.182	5664.05	4	389.78	6149.49	4	399.575	5625.2	4	533.881	1674.63	1	375.795	5837.27	4	385.391	5863.2	4	392.475	5765.44	4	367.689	5723.95	4	380.368	5692.5
391.462	5798.36	4	388.661	5420.89	4	398.596	5692.93	4	541.249	1621.35	1	416.379	6077.44	4	418.769	5601.7	4	438.585	5846.51	4	532.769	1603.58	1	373.191	5706.76	4	389.791	6221.31	4	399.583	5585.77	4	533.917	1716.08	1	375.829	5767.68	4	385.422	5932.3	4	392.501	5819.29	4	367.734	5885.7	4	380.399	5767.73
391.477	5707.65	4	388.702	5521.38	4	398.602	6075.7	4	541.262	1820.5	1	416.391	5501.03	4	418.794	5651.45	4	438.616	5726.64	4	532.804	1606.56	1	373.205	5447.97	4	389.849	6117.8	4	399.586	5771.3	4	533.947	1722.84	1	375.854	5694.03	4	385.427	5792.11	4	392.504	5874.31	4	367.748	5768.04	4	380.402	5606.89
391.5	5895.15	4	388.707	6208.84	4	398.723	6008.37	4	541.265	1596.45	1	416.394	5584.56	4	418.833	5640.83	4	438.665	5498.66	4	532.805	1636.65	1	373.226	5798.5	4	389.902	5939.46	4	399.611	5686.45	4	533.977	1606.11	1	375.883	5759.46	4	385.435	5913.13	4	392.52	5717.33	4	367.779	5639.52	4	380.425	5742.56
391.542	5994.49	4	388.717	5759.97	4	398.797	5913.74	4	541.274	1596.6	1	416.47	5625.53	4	418.966	5611.85	4	438.699	1677.98	1	532.823	1650.5	1	373.259	5669.29	4	389.905	6075.62	4	399.618	5692.06	4	534.001	1702.55	1	375.902	5886.84	4	385.453	6061.66	4	392.582	5657.29	4	367.783	5805.9	4	380.447	5889.14
391.573	5806	4	388.738	5642.8	4	398.818	5766.21	4	541.277	1801.54	1	416.542	5630.76	4	419.048	5648.19	4	438.706	5997.67	4	532.867	1570.02	1	373.334	5805.15	4	389.923	5770.99	4	399.619	6017.6	4	534.015	1745.15	1	375.929	5397.94	4	385.463	6107.86	4	392.592	5726.32	4	367.803	5683.22	4	380.493	5622.41
391.621	6002.83	4	388.76	5518.79	4	398.827	5627.62	4	541.3	1621.65	1	416.675	5972.84	4	419.113	5634.55	4	438.725	5555.51	4	532.872	1600.13	1	373.368	6151.8	4	390.049	5688.47	4	399.626	5721.32	4	534.017	1648.28	1	375.939	6266.12	4	385.524	5731.13	4	392.624	5732.96	4	367.856	5776.35	4	380.495	6035.63
391.642	6110.98	4	388.765	6279.16	4	398.831	5634.18	4	541.348	1598.57	1	416.694	5751.51	4	419.14	6175.1	4	438.75	5656.09	4	532.883	1661.29	1	373.385	5812.43	4	390.055	5695.13	4	399.639	5793.58	4	534.028	1626.05	1	375.961	6270.28	4	385.524	5992.38	4	392.689	6051.02	4	367.867	5733.6	4	380.505	5675.93
391.688	5887.11	4	388.782	5474.86	4	398.896	5878.92	4	541.357	1586.06	1	416.77	5834.29	4	419.187	5704.4	4	438.757	5723.86	4	532.903	1645.89	1	373.423	5751.94	4	390.061	6087.66	4	399.714	6070.88	4	534.043	1601.28	1	375.999	5920.52	4	385.555	6387.41	4	392.706	5901.89	4	367.875	5784.15	4	380.519	5339.14
391.694	5602.55	4	388.786	5749.78	4	398.906	5524.21	4	541.359	1600.5	1	416.774	6012.59	4	419.211	5614.03	4	438.766	5659.9	4	532.981	1565.02	1	373.452	6086.58	4	390.064	5699.94	4	399.723	5524.1	4	534.048	1634.13	1	376.023	6182.79	4	385.572	5647.15	4	392.734	5678.1	4	367.9	6071.97	4	380.545	5703.8
391.746	6085.75	4	388.792	5806.6	4	398.946	5654.42	4	541.359	1501.65	1	416.816	5423.69	4	419.216	5590.01	4	438.777	6131.22	4	533.027	1779.07	1	373.455	5634.11	4	390.067	5678.52	4	399.729	6056.03	4	534.064	1479.82	1	376.044	5782.15	4	385.61	6217.86	4	392.787	6229.9	4	367.905	5769.07	4	380.56	5516.81
391.801	5818.31	4	388.809	5617.79	4	399.001	5841.04	4	541.365	1615.78	1	416.878	5869.8	4	419.243	5761.79	4	438.827	5479.98	4	533.075	1703.25	1	373.486	6253.99	4	390.118	6324.51	4	399.79	5884.71	4	534.093	1582.45	1	376.07	5923.79	4	385.639	6174.86	4	392.81	5790.51	4	367.911	5673.59	4	380.561	5760.18
391.836	5835.97	4	388.82	5547.66	4	399.005	5721.14	4	541.375	1620.95	1	417.025	5682.91	4	419.469	5714.82	4	438.859	5590.44	4	533.1	1635.86	1	373.496	5672.17	4	390.132	6008.62	4	399.793	5689.25	4	534.13	1587.7	1	376.079	5795.48	4	385.714	6288.3	4	392.837	5711.23	4	367.922	5930.76	4	380.599	5710.92
391.859	6067.84	4	388.825	5761.36	4	399.036	6014.08	4	541.418	1646.47	1	417.076	5438.16	4	419.631	5552.01	4	438.911	5490.81	4	533.117	1751.28	1	373.498	5392.51	4	390.134	6116.93	4	399.869	5595.68	4	534.156	1689.38	1	376.09	6010.35	4	385.718	6078.43	4	392.856	5817	4	367.942	5778.1	4	380.672	5445.94
391.865	5838.19	4	388.829	5609.14	4	399.061	5908.99	4	541.441	1583.77	1	417.227	5742.99	4	419.673	6056.05	4	438.913	5606.98	4	533.165	1599.34	1	373.568	6254.29	4	390.166	5864.43	4	399.895	5745.38	4	534.164	1643.37	1	376.102	5728.72	4	385.744	5994.43	4	392.856	5494.63	4	368.002	6161.01	4	380.727	5697.5
391.874	6006.66	4	388.834	5750.98	4	399.082	5603.88	4	541.468	1626.67	1	417.278	5455.45	4	419.717	5598.03	4	438.967	6045.91	4	533.245	1583.54	1	373.577	5848.98	4	390.17	6036.97	4	399.9	5933.77	4	534.168	1560.58	1	376.105	5819.93	4	385.773	6144.65	4	392.875	5667.04	4	368.027	5838.46	4	380.741	6252.72
391.928	6094.98	4	388.866	5660.66	4	399.095	5961.7	4	541.469	1568.14	1	417.307	6118.73	4	419.733	5899.83	4	438.985	5739.05	4	533.255	1643.69	1	373.613	6122.16	4	390.22	5692.76	4	399.904	5934.12	4	534.235	1639.87	1	376.111	5826.49	4	385.801	6114.09	4	392.894	6127.6	4	368.082	5763.55	4	380.747	6154.95
391.951	5972.34	4	388.867	5893.78	4	399.113	6195.33	4	541.481	1658.19	1	417.316	5981.33	4	419.812	5674.97	4	439.074	5999.58	4	533.261	1608.44	1	373.635	6127.04	4	390.263	5706.56	4	399.953	5786.27	4	534.277	1724.84	1	376.126	5736.1	4	385.813	5698.45	4	392.906	5863.62	4	368.147	5919.01	4	380.773	6000.82
391.957	5969.35	4	388.894	5564.6	4	399.117	5921.1	4	541.514	1647.45	1	417.503	5844.04	4	419.846	5806.67	4	439.132	5800.87	4	533.281	1656.82	1	373.66	5697.05	4	390.291	5498.21	4	399.965	5697.76	4	534.298	1658.4	1	376.13	6073.11	4	385.909	6183.67	4	392.959	6004.73	4	368.164	5804.48	4	380.778	5679.27
391.969	5531.07	4	388.897	5705.47	4	399.118	5391.35	4	541.561	1556.99	1	417.599	5743.7	4	419.933	5646.13	4	439.134	5625.43	4	533.307	1673.41	1	373.693	5621.09	4	390.308	5643.59	4	399.966	5917.53	4	534.299	1594.41	1	376.174	6014.99	4	385.937	5850.09	4	392.98	5658.47	4	368.207	5735.31	4	380.801	5859.17
392.006	5957.89	4	388.898	5645.98	4	399.14	5667.91	4	541.588	1779.65	1	417.754	5579.8	4	419.95	5639.91	4	439.159	5876.54	4	533.345	1588.39	1	373.731	5752.47	4	390.338	6157.12	4	399.984	5787.38	4	534.306	1650.59	1	376.175	5880.81	4	385.964	5922.49	4	393.047	5752.64	4	368.215	5873.93	4	380.809	5628.32
392.04	5737.13	4	388.914	5777.67	4	399.143	5787.29	4	541.621	1695.37	1	417.843	5971.24	4	419.983	5526.72	4	439.166	5580.02	4	533.347	1582.45	1	373.77	6036.79	4	390.37	5910.93	4	400.021	6120.48	4	534.335	1654.23	1	376.185	5664.74	4	385.969	6155.29	4	393.079	5791.03	4	368.229	5795.64	4	380.863	5611.22
392.078	5634.45	4	388.982	5918.09	4	399.149	5792.98	4	541.683	1648.52	1	418.045	5429.3	4	420.015	5834.56	4	439.274	5900.39	4	533.359	1547.35	1	373.773	5872.54	4	390.417	5856.56	4	400.034	5949.21	4	534.348	1650.6	1	376.191	6266.03	4	386.022	5709.85	4	393.168	5656.12	4	368.238	5745.53	4	380.866	5457.73
392.15	5948.69	4	389.035	5752.74	4	399.187	5988.45	4	541.695	1633.41	1	418.062	5680.81	4	420.046	5518.97	4	439.384	5683.21	4	533.362	1682.42	1	373.817	5709.22	4	390.436	5876.18	4	400.036	5742.28	4	534.354	1603.08	1	376.206	5789.36	4	386.043	5740.22	4	393.215	5791.45	4	368.245	5731.89	4	380.871	5703.67
392.167	5673.39	4	389.045	5885.72	4	399.192	5892.88	4	541.701	1583.59	1	418.089	5597.16	4	420.051	5562.59	4	439.395	5751.56	4	533.397	1620.33	1	373.834	5833.7	4	390.476	5793.03	4	400.037	5562.51	4	534.362	1603.95	1	376.208	5796.31	4	386.047	5479.6	4	393.256	6174.49	4	368.279	5702.02	4	380.873	6218.52
392.237	5773.99	4	389.061	5586.84	4	399.228	5794.65	4	541.72	1703.05	1	418.138	5488.14	4	420.089	5872.25	4	439.403	6110.12	4	533.413	1585.6	1	373.845	5804.49	4	390.523	6001.95	4	400.042	5723.89	4	534.385	1676.21	1	376.277	5999.05	4	386.065	5519.11	4	393.26	6060.4	4	368.28	5921.87	4	380.929	5703.89
392.239	5668.72	4	389.101	5846.99	4	399.236	5738.62	4	541.725	1591.82	1	418.142	5574.2	4	420.114	5742.29	4	439.451	5371.31	4	533.425	1633.6	1	373.846	5708.28	4	390.538	5790.05	4	400.062	5757.84	4	534.46	1702.9	1	376.291	5734.88	4	386.068	5662.41	4	393.365	5678.72	4	368.293	5753.5	4	380.932	5609.96
392.291	5621.18	4	389.161	5652.37	4	399.356	5808.21	4	541.742	1749.49	1	418.248	6106.43	4	420.188	5904.47	4	439.496	6035.15	4	533.43	1703.31	1	373.849	5792.17	4	390.557	6146.12	4	400.078	5957.47	4	534.462	1518.14	1	376.296	5787.58	4	386.079	5712.34	4	393.371	5842.21	4	368.305	5874.76	4	380.933	5685.11
392.382	5138.22	4	389.17	5772.22	4	399.421	5638.57	4	541.743	1674.41	1	418.34	5863.84	4	420.189	5738.24	4	439.523	6187.39	4	533.446	1664.38	1	373.862	5748.81	4	390.581	5846.73	4	400.123	5766.91	4	534.464	1725.34	1	376.298	5713.68	4	386.086	5922.01	4	393.387	5640.53	4	368.326	6047.67	4	380.945	5616.77
392.455	5770.98	4	389.186	5723.03	4	399.456	5684.77	4	541.782	1616.3	1	418.351	5653.38	4	420.197	6154.18	4	439.56	5706.38	4	533.464	1656.48	1	373.877	5724.21	4	390.6	5762.09	4	400.14	5613.71	4	534.508	1645.15	1	376.31	5784.11	4	386.1	6078.12	4	393.484	5865.95	4	368.341	5399.82	4	380.966	5529.41
392.46	5833.68	4	389.197	6005.45	4	399.471	5723.57	4	541.799	1806.07	1	418.366	5711.64	4	420.239	5574.76	4	439.578	5805.61	4	533.47	1635.14	1	373.887	5922.77	4	390.603	5689.98	4	400.143	5424.25	4	534.514	1699.86	1	376.316	5758.09	4	386.14	5772.02	4	393.514	5698.24	4	368.384	5945.59	4	380.995	5552.82
392.562	5757.09	4	389.229	5818.2	4	399.49	5719.82	4	541.799	1604.47	1	418.388	5733.12	4	420.356	5760.1	4	439.61	5694.49	4	533.494	1659.75	1	373.896	5790.89	4	390.627	5942.97	4	400.169	5680.46	4	534.583	1554.05	1	376.319	5894.86	4	386.184	5913.77	4	393.515	5907.78	4	368.429	5846.09	4	381.004	5617.82
392.685	5687.24	4	389.258	6260.48	4	399.52	5650.4	4	541.802	1621.81	1	418.468	6031.51	4	420.491	5768.61	4	439.61	5812.77	4	533.51	1546.83	1	373.921	5781.84	4	390.658	5789.44	4	400.215	5754.83	4	534.64	1740.41	1	376.363	5759.66	4	386.2	6106.25	4	393.539	5713.8	4	368.617	5823.82	4	381.016	5656.74
392.698	5707.03	4	389.297	5967.7	4	399.569	5815.03	4	541.861	1704.08	1	418.554	5557.27	4	420.515	5747.56	4	439.679	5811.65	4	533.548	1651.33	1	373.952	5976.5	4	390.662	5767.15	4	400.352	5867.2	4	534.644	1627.42	1	376.371	6020.26	4	386.214	5785.41	4	393.596	5496.51	4	368.622	5576.01	4	381.038	5941.75
392.764	5519.79	4	389.333	5708.19	4	399.58	5792.39	4	541.87	1648.44	1	418.575	5723.95	4	420.529	5619.26	4	439.714	5648.26	4	533.552	1662.96	1	373.991	6181.71	4	390.723	5815.61	4	400.37	5681	4	534.655	1609.32	1	376.409	5879.17	4	386.214	5986.22	4	393.598	5703.99	4	368.64	5740.57	4	381.075	5798.81
392.801	5909.1	4	389.339	5703.01	4	399.598	6171.45	4	541.873	1668.14	1	418.656	5800.77	4	420.545	5461.74	4	439.724	5857.86	4	533.553	1861.23	1	374.018	5709.94	4	390.736	5878.96	4	400.399	5564.81	4	534.665	1715.26	1	376.459	5639.54	4	386.235	5616.15	4	393.612	5702.29	4	368.658	5982.1	4	381.077	6240.25
392.812	5595.29	4	389.365	5974.69	4	399.606	5858.54	4	541.901	1747.26	1	418.784	5650.39	4	420.59	5699.53	4	439.735	5745.49	4	533.558	1675.53	1	374.114	6112.26	4	390.738	5604.65	4	400.414	5720.06	4	534.665	1613.63	1	376.529	6036.48	4	386.268	5468.52	4	393.638	5836.45	4	368.676	5705.95	4	381.086	5742.92
392.924	5443.35	4	389.387	5537.46	4	399.608	5674.06	4	541.905	1664.33	1	418.814	5726.12	4	420.62	6019.51	4	439.755	5562.48	4	533.563	1595.53	1	374.117	6066.62	4	390.798	5796.19	4	400.433	5832.27	4	534.686	1738.65	1	376.567	5912.1	4	386.303	5738.08	4	393.658	5765.61	4	368.724	5627.68	4	381.138	5636.49
392.959	5793	4	389.427	5510.58	4	399.655	5554.49	4	541.916	1749.18	1	418.817	5758.51	4	420.636	5590.72	4	439.762	5952.06	4	533.565	1602.37	1	374.158	5964.72	4	390.803	5780.57	4	400.484	5759.85	4	534.687	1636.13	1	376.585	5722.56	4	386.322	5854.79	4	393.697	5724.23	4	368.772	5781.77	4	381.199	5439.87
392.961	5821.32	4	389.444	5824.78	4	399.658	5693.17	4	541.928	1723.51	1	418.823	5701.43	4	420.736	6141.21	4	439.815	5781.21	4	533.581	1619.72	1	374.177	6042.71	4	390.839	5906.46	4	400.507	5789.58	4	534.695	1686.78	1	376.624	5895.52	4	386.335	6229.1	4	393.72	5880.21	4	368.836	5677.12	4	381.216	5659.34
393.019	5506.32	4	389.507	5743.39	4	399.678	5655.44	4	541.939	1637.41	1	418.825	5952.87	4	420.775	5744.93	4	439.85	6127.07	4	533.594	1594.58	1	374.221	5927.57	4	390.847	5807.53	4	400.519	6143.78	4	534.728	1697.81	1	376.675	5913.33	4	386.348	5876.05	4	393.753	5606.8	4	368.839	5718.08	4	381.22	5705.12
393.042	6054.74	4	389.529	5649	4	399.688	5915.93	4	541.961	1618.19	1	418.83	5774.44	4	420.847	5699.23	4	439.889	6013.83	4	533.617	1724.64	1	374.228	5742.65	4	390.861	5670.4	4	400.52	5973.79	4	534.742	1642.03	1	376.704	5704.99	4	386.352	5677.79	4	393.756	5681.14	4	368.857	5933.72	4	381.232	5699.67
393.103	5683.4	4	389.531	5642.75	4	399.709	5766.41	4	541.977	1657.76	1	418.86	5678.16	4	420.998	5738.55	4	439.953	5846.92	4	533.671	1714.41	1	374.233	6239.6	4	390.878	5700.88	4	400.524	6172.25	4	534.746	1622.68	1	376.757	6055.91	4	386.411	5950.24	4	393.775	6339.75	4	368.859	5942.99	4	381.232	5823.85
393.161	6284.36	4	389.546	5621.98	4	399.726	5455.05	4	542.029	1595.22	1	419.162	6170.7	4	421.065	6041.69	4	439.96	5692.09	4	533.674	1605.39	1	374.237	5258.04	4	390.882	5703.08	4	400.569	5650.99	4	534.776	1638.39	1	376.759	5707.91	4	386.441	5890.91	4	393.776	5594.13	4	368.863	5878.62	4	381.237	5544.91
393.238	5633.07	4	389.563	5752.16	4	399.746	6035.66	4	542.053	1697.57	1	419.166	5771.72	4	421.193	5879.33	4	440.02	5796.97	4	533.684	1614.23	1	374.255	6373.69	4	390.921	5875.59	4	400.619	5640.03	4	534.792	1612.63	1	376.76	6025.67	4	386.459	5863.71	4	393.785	5638.39	4	368.895	5636.7	4	381.249	5472.19
393.334	5675.75	4	389.568	5675.82	4	399.788	5572.87	4	542.068	1677.05	1	419.178	5577.97	4	421.196	5682.74	4	440.064	5718.97	4	533.75	1704.45	1	374.283	6113.24	4	390.947	5963.52	4	400.637	5711.44	4	534.846	1742.92	1	376.786	5766.86	4	386.462	6048.63	4	393.817	5524.85	4	368.898	5989.77	4	381.288	5720.34
393.42	5768.73	4	389.583	5669.47	4	399.792	5717.12	4	542.127	1689.69	1	419.19	5588.97	4	421.199	5838.85	4	440.113	5608.61	4	533.808	1612.39	1	374.287	5789.03	4	390.954	5948.81	4	400.651	5745.1	4	534.848	1649.08	1	376.809	5760.76	4	386.472	5846.85	4	393.899	5899.84	4	368.907	5686.01	4	381.358	5732.13
393.424	5628.77	4	389.625	5656.94	4	399.869	5585.8	4	542.147	1696.88	1	419.193	6291.63	4	421.218	5647.96	4	440.2	5728.38	4	533.84	1760.83	1	374.291	6124.56	4	390.956	5518	4	400.657	5860.1	4	534.92	1642.08	1	376.838	6150.05	4	386.485	6077.88	4	393.902	5530.75	4	368.908	5691.6	4	381.408	5679.09
393.447	5692.45	4	389.653	5844.9	4	399.883	5536.29	4	542.155	1536.83	1	419.234	5599.16	4	421.42	5672.56	4	440.275	5745.92	4	533.871	1610.62	1	374.324	5806.13	4	390.973	5648.57	4	400.663	5853.4	4	534.92	1747.56	1	376.885	5986.92	4	386.503	5740.6	4	393.969	5648.52	4	368.93	5798.73	4	381.419	5843.12
393.454	5938.97	4	389.733	5592.42	4	399.907	5764.02	4	542.163	1693.1	1	419.326	5704.32	4	421.455	5844.79	4	440.353	5761.14	4	533.883	1654.61	1	374.381	5822.52	4	391.015	5891.49	4	400.709	5712.34	4	534.967	1648.92	1	376.9	5847.18	4	386.544	5567.08	4	394.075	5741.01	4	368.969	5735.1	4	381.43	5616.11
393.474	5649.37	4	389.769	6344.58	4	399.975	5485.07	4	542.206	1684.71	1	419.335	6121.56	4	421.466	5690.48	4	440.401	5771.35	4	533.929	1514.85	1	374.406	6466.87	4	391.037	5924.17	4	400.772	5691.23	4	534.981	1598.31	1	376.936	5865.58	4	386.549	5607.1	4	394.085	5741.85	4	368.974	5846.47	4	381.438	6324.9
393.478	5954.09	4	389.787	5491.84	4	399.981	5919.42	4	542.212	1554.87	1	419.4	5942.79	4	421.549	5983.53	4	440.405	5774.72	4	533.973	1627.71	1	374.418	5868.68	4	391.067	5801.52	4	400.774	5862.83	4	535.015	1746.66	1	376.945	5695.49	4	386.62	5702.75	4	394.17	6225.11	4	368.994	5957.92	4	381.445	5733.86
393.507	5650.8	4	389.827	5891.58	4	399.992	5749.24	4	542.215	1586.19	1	419.495	5892.64	4	421.56	5790.26	4	440.492	5806.86	4	533.975	1623.44	1	374.427	5948.49	4	391.084	5651.93	4	400.774	5445.72	4	535.019	1582.26	1	376.973	5784.12	4	386.635	5797.76	4	394.241	5633.38	4	368.997	5587.68	4	381.496	5847.05
393.523	6351.1	4	389.885	6108.33	4	400.031	5879.5	4	542.219	1543.8	1	419.496	5990.25	4	421.575	5497.21	4	440.591	5725.84	4	533.977	1694.73	1	374.435	5832.43	4	391.096	5729.23	4	400.782	6161.47	4	535.033	1675.38	1	377.016	5888.45	4	386.643	6165.86	4	394.253	6337.2	4	369.058	5737.24	4	381.503	6037.21
393.556	5589.59	4	389.976	5955.43	4	400.045	5693.13	4	542.283	1800.81	1	419.499	5532.36	4	421.629	5632.07	4	440.626	5704.28	4	533.995	1667.73	1	374.437	5809.69	4	391.117	5759.61	4	400.795	5826.86	4	535.044	1659.83	1	377.042	5803.74	4	386.776	5521.82	4	394.26	6128.64	4	369.076	5655.61	4	381.535	5740.7
393.582	5685.8	4	389.977	5503.25	4	400.053	5608.33	4	542.284	1630.21	1	419.623	5681.92	4	421.641	5526.63	4	440.689	5836.42	4	534.012	1644.96	1	374.452	5896.84	4	391.173	5648.88	4	400.865	5949.18	4	535.046	1583.74	1	377.079	6172.65	4	386.807	5641.88	4	394.313	5767.93	4	369.094	5951.51	4	381.552	5763.18
393.588	5704.88	4	390.029	5745.86	4	400.061	5540.77	4	542.293	1646.8	1	419.661	5808.04	4	421.651	5620.02	4	440.719	5711.17	4	534.012	1607.81	1	374.456	5931.88	4	391.188	5648.72	4	400.871	6116.96	4	535.072	1699.14	1	377.101	6057.23	4	386.818	6209.88	4	394.345	6010	4	369.13	5728.39	4	381.593	5731.76
393.622	5767.33	4	390.043	5811.9	4	400.098	6085.32	4	542.329	1670.97	1	419.665	5637.98	4	421.652	5359.67	4	440.923	5875.72	4	534.047	1681.61	1	374.479	6013.97	4	391.192	5881.94	4	400.872	5763.41	4	535.081	1580.8	1	377.109	5991.8	4	386.823	5889.88	4	394.36	5684.27	4	369.141	6029.01	4	381.61	5599.28
393.65	6159.74	4	390.055	6051.04	4	400.101	5744.86	4	542.361	1771.49	1	419.676	5954.88	4	421.655	5532.61	4	441.064	5437.82	4	534.077	1754.53	1	374.514	5808.91	4	391.237	5655.74	4	400.875	5668.13	4	535.081	1680.01	1	377.114	5638.93	4	386.909	5968.48	4	394.371	5782.01	4	369.267	5530.07	4	381.616	6038.61
393.67	5958.9	4	390.068	6256.43	4	400.131	5576.36	4	542.37	1643.36	1	419.684	5671.77	4	421.665	5759.4	4	441.114	5769.47	4	534.082	1650.9	1	374.52	5924.51	4	391.279	5700.18	4	400.947	5622.16	4	535.107	1634.79	1	377.116	6198.69	4	386.916	5755.87	4	394.372	6137.48	4	369.331	5999.38	4	381.619	5711.36
393.698	5753.32	4	390.071	5888.52	4	400.131	5911.23	4	542.406	1610.42	1	419.752	6122.34	4	421.673	5969.41	4	441.382	5825.2	4	534.09	1785.29	1	374.523	5770.54	4	391.334	5662.9	4	400.963	5722.58	4	535.117	1629.43	1	377.118	5899.81	4	386.925	5912.07	4	394.386	6218.36	4	369.345	5863.3	4	381.639	5667.79
393.753	6101.72	4	390.101	5781.66	4	400.184	5764.39	4	542.407	1614.18	1	419.776	5753.75	4	421.744	6153.66	4	441.412	5596.04	4	534.102	1730.67	1	374.531	5826.13	4	391.336	5843.88	4	400.971	5576.98	4	535.122	1710.5	1	377.189	5762.25	4	386.993	5775.39	4	394.458	6052.66	4	369.39	5612.97	4	381.701	5676.03
393.787	5733.66	4	390.119	5915.48	4	400.193	5793.25	4	542.41	1634.58	1	419.947	5601.26	4	421.837	5463.52	4	441.465	5583.47	4	534.106	1667.21	1	374.534	5980.4	4	391.384	5546.25	4	400.973	5643.73	4	535.137	1569.01	1	377.209	5874.02	4	387.01	5655.91	4	394.5	5635.45	4	369.394	5623.76	4	381.756	5609.99
393.803	5489.15	4	390.141	6285.7	4	400.195	5510.75	4	542.417	1598.39	1	419.995	5743.73	4	421.884	5689.18	4	441.539	5521.87	4	534.112	1669.25	1	374.537	5726.95	4	391.42	5898.96	4	401.003	6151.8	4	535.154	1637.57	1	377.289	5609.73	4	387.018	5907.3	4	394.538	5752.21	4	369.421	5756.71	4	381.784	6176.06
393.808	5688.9	4	390.169	5512.99	4	400.219	5554.75	4	542.45	1745.61	1	420.137	5906.2	4	422.038	5427.29	4	441.59	5771.29	4	534.145	1561.01	1	374.55	5625.59	4	391.487	5526.6	4	401.046	5717.66	4	535.159	1680.07	1	377.29	5728.62	4	387.056	5801.48	4	394.539	5625.09	4	369.433	5538.47	4	381.791	5387.35
393.814	5451.31	4	390.176	5818.24	4	400.282	5897.09	4	542.456	1539.01	1	420.143	5791.79	4	422.045	5517.76	4	441.609	5610.74	4	534.15	1698.16	1	374.561	6040.42	4	391.492	5774.74	4	401.055	5805.65	4	535.166	1607.8	1	377.31	5833.85	4	387.087	6020.42	4	394.558	5905.39	4	369.472	5910.19	4	381.813	5436.34
393.893	5765.99	4	390.181	5634.16	4	400.29	5770.58	4	542.464	1678.8	1	420.191	5807.23	4	422.048	5633.26	4	441.63	5779.94	4	534.238	1567.18	1	374.568	5818.08	4	391.523	5735.03	4	401.059	5816.74	4	535.168	1732.65	1	377.31	5965.2	4	387.116	6023.15	4	394.603	5908.54	4	369.5	5876.06	4	381.833	5561.36
393.925	5565.36	4	390.187	5688.04	4	400.322	5552.33	4	542.488	1563.59	1	420.224	5986.92	4	422.052	6331.76	4	441.691	5435.86	4	534.241	1748.37	1	374.571	5694.69	4	391.569	5599.9	4	401.138	5655.09	4	535.186	1673.17	1	377.361	5701.08	4	387.143	6014.34	4	394.642	5919.56	4	369.504	5627.01	4	381.908	5493.45
393.925	6098.12	4	390.192	6181.26	4	400.45	5556.61	4	542.556	1676.38	1	420.251	6134.44	4	422.104	5921.59	4	441.764	5651.33	4	534.246	1646.89	1	374.582	6083.09	4	391.577	5924.49	4	401.179	5761.95	4	535.191	1804.46	1	377.416	5830.96	4	387.184	5710.5	4	394.667	5648.89	4	369.511	5690.83	4	381.913	5771.47
393.936	6112.11	4	390.299	5676.65	4	400.466	6002.58	4	542.56	1697.3	1	420.314	5612.7	4	422.132	6212.55	4	441.815	5822.69	4	534.287	1611.51	1	374.602	5847.21	4	391.587	6398.16	4	401.216	5825.6	4	535.193	1603.66	1	377.537	5821.58	4	387.275	5572.44	4	394.677	5794.58	4	369.532	5826.55	4	381.939	6328.99
393.958	5677.76	4	390.314	5688.49	4	400.52	5937.74	4	542.614	1636.16	1	420.325	6072.17	4	422.194	5772.51	4	441.887	5633.65	4	534.301	1696.94	1	374.608	5690.06	4	391.587	5744.22	4	401.267	5592.64	4	535.197	1610.91	1	377.576	5673.35	4	387.286	5678.83	4	394.688	5873.76	4	369.538	5747.37	4	381.947	5637.3
394.009	5894.36	4	390.331	5989.92	4	400.644	5700.67	4	542.641	1743.48	1	420.47	5624.42	4	422.296	5580.46	4	441.925	5828.67	4	534.309	1568.96	1	374.638	5658.16	4	391.591	5924.61	4	401.275	5552.27	4	535.254	1683.97	1	377.584	5879.02	4	387.407	5439.6	4	394.712	5457.73	4	369.543	5873.57	4	381.949	6067.78
394.022	5486.23	4	390.331	5820.15	4	400.66	5908.66	4	542.663	1660.69	1	420.475	5810.36	4	422.342	5686.78	4	441.981	5711.64	4	534.309	1592.13	1	374.676	6256.32	4	391.607	5745.33	4	401.277	5828.44	4	535.301	1681.74	1	377.649	5583.3	4	387.474	5848.42	4	394.767	6214.88	4	369.545	5702.7	4	381.962	5593.85
394.097	5894.6	4	390.382	5826.96	4	400.671	5685.99	4	542.677	1765.81	1	420.506	5783.69	4	422.452	5532.04	4	442.043	5803.29	4	534.33	1712.51	1	374.677	5732.97	4	391.61	5804.75	4	401.295	5890.48	4	535.322	1694.16	1	377.658	5872.05	4	387.522	6010.69	4	394.791	5733.31	4	369.545	5755.56	4	381.989	6152.2
394.114	6001.02	4	390.419	5842.26	4	400.677	5772.49	4	542.696	1761.6	1	420.518	5721.98	4	422.486	5746.3	4	442.086	5607.89	4	534.369	1614.46	1	374.694	6276.63	4	391.66	5988.57	4	401.301	5590.98	4	535.346	1630.18	1	377.662	5824.15	4	387.555	5872.75	4	394.833	5609.73	4	369.581	6216.11	4	382.014	5740.19
394.138	5481.16	4	390.541	5960.24	4	400.7	5802.88	4	542.705	1670.93	1	420.592	5305.14	4	422.539	6068.15	4	442.147	5756.97	4	534.39	1715.67	1	374.724	5951.84	4	391.668	5641.61	4	401.302	5736.77	4	535.398	1693	1	377.665	5919.21	4	387.582	5673.02	4	394.846	5642.68	4	369.587	5608.02	4	382.029	5645.27
394.165	5622.03	4	390.549	5576.1	4	400.706	5766.22	4	542.711	1772.67	1	420.595	5823.86	4	422.579	5552.17	4	442.198	5775.89	4	534.403	1624.67	1	374.761	5816.59	4	391.688	5626.41	4	401.312	5729.97	4	535.404	1601.9	1	377.688	5761.21	4	387.585	5825.44	4	394.854	6086.04	4	369.614	5769.85	4	382.058	5652.06
394.17	5635.92	4	390.55	5642.24	4	400.716	6014.05	4	542.717	1636.43	1	420.759	5751.53	4	422.626	5710.74	4	442.208	5745.74	4	534.404	1688.34	1	374.784	5377.47	4	391.709	6248.12	4	401.367	5496.8	4	535.421	1655.02	1	377.7	5791.35	4	387.593	6134.84	4	394.862	5970.45	4	369.619	5613.65	4	382.066	5551.8
394.178	6185.93	4	390.568	5489.59	4	400.749	5747.75	4	542.747	1681.13	1	420.909	5651.95	4	422.675	5748.86	4	442.32	5778.37	4	534.416	1579.95	1	374.786	5685.68	4	391.743	5801.5	4	401.369	5689.11	4	535.455	1575.86	1	377.717	6232.86	4	387.599	5781.61	4	394.864	5773.81	4	369.641	5761.67	4	382.089	5974.61
394.191	5879.49	4	390.573	5697.87	4	400.75	6016.67	4	542.779	1652.06	1	420.992	5806.61	4	422.732	5596.22	4	442.362	5743.4	4	534.435	1733.11	1	374.793	5806.53	4	391.75	5681.96	4	401.383	5735.82	4	535.461	1733.69	1	377.723	5705.51	4	387.643	5571.02	4	394.901	6016.43	4	369.655	5641.45	4	382.098	5867.25
394.205	5715.65	4	390.583	5597.03	4	400.762	5874.48	4	542.811	1599.8	1	421.002	5621.69	4	422.775	5704.74	4	442.611	6042.1	4	534.464	1575.64	1	374.813	5827.23	4	391.762	6143.85	4	401.385	6031.15	4	535.463	1604.37	1	377.726	6206.12	4	387.643	6089.98	4	394.946	5761.38	4	369.663	5984.81	4	382.104	5499.87
394.25	5839.08	4	390.586	6140.19	4	400.772	5780.82	4	542.816	1626.34	1	421.017	5937.58	4	422.829	5563.26	4	442.629	5973.6	4	534.472	1533.71	1	374.815	5823.04	4	391.856	6038.73	4	401.392	5836.68	4	535.512	1713.67	1	377.748	5632.6	4	387.653	5928.44	4	395.076	6120.11	4	369.667	5747.43	4	382.179	5724.69
394.344	5901.06	4	390.587	6080.19	4	400.776	5723.27	4	542.839	1707.16	1	421.11	5774.67	4	422.829	1600.27	1	442.646	5497.79	4	534.483	1637.32	1	374.845	5663.81	4	391.859	5742.07	4	401.426	5792.76	4	535.524	1604.63	1	377.755	6086.28	4	387.68	5951.85	4	395.093	5987.14	4	369.688	6099.52	4	382.209	5495.2
394.432	5310.92	4	390.588	5783.83	4	400.82	6178.16	4	542.865	1630.08	1	421.156	5668.09	4	422.876	5543.39	4	442.677	5582.25	4	534.531	1748.54	1	374.894	6348.89	4	391.883	6014.94	4	401.436	5948.47	4	535.552	1704.92	1	377.761	5813.38	4	387.733	5715.31	4	395.098	5565.46	4	369.694	5671.33	4	382.21	6190.78
394.434	5932.45	4	390.597	5778.24	4	400.843	5903.49	4	542.893	1687.64	1	421.162	6025.63	4	422.882	5788.56	4	442.695	5443.63	4	534.622	1630.26	1	374.908	5884.39	4	391.931	5754.18	4	401.459	5559.45	4	535.559	1613.14	1	377.761	5758.17	4	387.785	5967.95	4	395.098	5846.94	4	369.826	5808.52	4	382.279	5531.86
394.446	6077.07	4	390.647	5962.56	4	400.881	5699.43	4	542.925	1690.74	1	421.192	5882.44	4	422.909	5648.19	4	442.784	5881.27	4	534.655	1583.03	1	374.941	5691.44	4	391.949	5678.56	4	401.464	6091.32	4	535.594	1609.36	1	377.763	5599.1	4	387.801	5823.9	4	395.11	5916.85	4	369.833	5630.46	4	382.318	5682.96
394.452	5769.99	4	390.676	5760.6	4	400.889	5818.04	4	542.964	1832.89	1	421.314	6288.95	4	422.926	5585.54	4	442.863	5725.06	4	534.715	1572.17	1	374.991	5752.19	4	391.958	5818.11	4	401.501	5754.57	4	535.614	1685.13	1	377.782	5709.77	4	387.808	5835.98	4	395.153	5658.05	4	369.877	5701.64	4	382.378	5784.12
394.483	5910.23	4	390.706	5853.9	4	400.897	5870.88	4	542.979	1675.41	1	421.315	5505.03	4	422.932	5830.6	4	442.869	6194	4	534.751	1678.14	1	375.016	5982.64	4	391.959	5892.55	4	401.513	5762	4	535.624	1681.5	1	377.819	5911.81	4	387.818	5707.19	4	395.17	5846.71	4	369.878	5648.78	4	382.39	6034.07
394.5	5619.75	4	390.722	5751.25	4	400.899	5792.01	4	542.997	1755.7	1	421.342	5628.29	4	423.03	5611.54	4	442.871	5606.5	4	534.752	1712.63	1	375.026	5975.71	4	391.995	5549.09	4	401.517	5995.15	4	535.635	1624.81	1	377.831	5790.52	4	387.833	5682.09	4	395.189	5578.75	4	369.906	6131.79	4	382.416	6085.3
394.535	5538.85	4	390.765	5800.53	4	400.903	6175.88	4	543.097	1653.8	1	421.421	5922.6	4	423.058	5580.25	4	442.879	5301.45	4	534.797	1536.89	1	375.03	5916.8	4	392.017	5703.5	4	401.536	5685.2	4	535.714	1613.25	1	377.934	5910.53	4	387.851	5785.74	4	395.239	5951.62	4	369.931	5832.62	4	382.425	5928.32
394.546	5752.13	4	390.799	5664.54	4	401.002	6051.48	4	543.098	1676.18	1	421.626	5680.58	4	423.121	5876.52	4	442.884	5741.22	4	534.803	1713.48	1	375.091	5548.38	4	392.093	5858.89	4	401.577	6108.86	4	535.725	1558.47	1	377.961	5931.5	4	387.866	5504.22	4	395.271	5960.24	4	369.954	5924.51	4	382.512	5312.51
394.61	5537.23	4	390.838	5668.33	4	401.037	5461.01	4	543.116	1750.71	1	421.638	5739.1	4	423.135	6117.77	4	442.895	5723.99	4	534.845	1648.29	1	375.126	6161.36	4	392.163	5714.83	4	401.577	5780.48	4	535.735	1612.47	1	377.974	5614.64	4	387.873	5567.44	4	395.272	5682.97	4	369.971	5835.56	4	382.52	5597.95
394.615	5648	4	390.845	5597.54	4	401.057	6104.82	4	543.118	1603.56	1	421.721	5512.71	4	423.173	5622.36	4	442.906	5691.88	4	534.874	1722.76	1	375.136	5818.53	4	392.192	5917.25	4	401.588	5647.48	4	535.742	1566.4	1	378.009	5599.16	4	387.916	5867.51	4	395.285	5697.04	4	369.977	5487.26	4	382.521	5712.12
394.616	5498.53	4	390.851	5628.8	4	401.115	6223.94	4	543.121	1677.6	1	421.776	5552.47	4	423.284	5767.2	4	442.931	5658.95	4	534.887	1562.69	1	375.168	5824.87	4	392.264	5872.25	4	401.601	5824.94	4	535.775	1678.94	1	378.055	6143.11	4	387.965	6029.95	4	395.302	5713.45	4	369.981	5732.69	4	382.527	5484.92
394.645	5923.87	4	390.893	5870.66	4	401.143	5577.94	4	543.146	1634.02	1	421.829	5752.09	4	423.336	5723.73	4	443.096	5708.41	4	534.899	1596.27	1	375.169	5580.25	4	392.302	5648.19	4	401.614	5736.91	4	535.799	1546.35	1	378.065	5724.32	4	387.977	5725.62	4	395.339	5695.38	4	370.03	5763.67	4	382.707	5636.05
394.659	5733.84	4	390.929	5127.04	4	401.146	5491.38	4	543.203	1622.77	1	421.858	6007	4	423.369	5633.76	4	443.179	5759.65	4	534.911	1670.52	1	375.18	5748.85	4	392.332	5605.17	4	401.626	5765.01	4	535.866	1536.97	1	378.098	6026.81	4	388.031	5624.77	4	395.342	5629.08	4	370.047	5677.13	4	382.722	5725.34
394.775	6005.01	4	390.955	5767.79	4	401.162	5872.66	4	543.207	1609.25	1	421.886	5493.13	4	423.458	5734.71	4	443.179	5637.55	4	534.911	1672.69	1	375.201	5969.39	4	392.404	5799.44	4	401.645	5818.56	4	535.866	1643.09	1	378.164	5671.57	4	388.048	5899.44	4	395.424	6056.96	4	370.09	5828.77	4	382.767	5268.56
394.78	5374.82	4	390.981	5777.87	4	401.19	5808.09	4	543.236	1767.84	1	421.901	5782.54	4	423.534	6142.16	4	443.229	5641.72	4	534.917	1608.77	1	375.225	5815.32	4	392.439	5814.73	4	401.673	5607.82	4	535.875	1662.95	1	378.176	6196.89	4	388.07	5899.18	4	395.425	5775.67	4	370.094	5965.38	4	382.796	5448.18
394.814	5651.29	4	391.007	5520.42	4	401.215	5537.84	4	543.291	1634.45	1	421.941	5539.01	4	423.56	5757.24	4	443.234	5671.27	4	534.98	1656.13	1	375.252	5874.68	4	392.483	5756.01	4	401.685	5628.83	4	535.901	1603.26	1	378.202	5865.93	4	388.088	5762.25	4	395.449	6051.62	4	370.115	5586.49	4	382.83	5878.45
394.84	5961.2	4	391.038	5343.39	4	401.232	5502.1	4	543.298	1688.18	1	422.143	5654.71	4	423.565	6126.07	4	443.329	5752.21	4	535.04	1565.47	1	375.253	5850.97	4	392.49	5939.39	4	401.688	5806.38	4	535.91	1566	1	378.235	5761.94	4	388.106	5667.89	4	395.459	5678.23	4	370.141	5922.15	4	382.856	6027.66
394.881	5628.03	4	391.044	5783.39	4	401.26	5687.49	4	543.362	1526.56	1	422.233	5664.82	4	423.671	6104.3	4	443.351	5711.01	4	535.086	1573.28	1	375.273	6307.13	4	392.494	5903.41	4	401.718	5596.82	4	536.017	1675.89	1	378.29	5785.56	4	388.108	5910.45	4	395.489	5565.12	4	370.153	6117.12	4	382.857	6201.3
394.934	5661.59	4	391.081	5685.29	4	401.274	5719.98	4	543.374	1659.65	1	422.271	5691.72	4	423.685	5706.37	4	443.37	5513.8	4	535.134	1581.45	1	375.33	5610.96	4	392.501	5685.58	4	401.815	5600.42	4	536.038	1615.01	1	378.299	6106.77	4	388.116	5967.96	4	395.513	5691.86	4	370.231	5609.04	4	382.898	5534.52
394.944	5700.28	4	391.129	5800.04	4	401.33	6208.45	4	543.388	1661.37	1	422.311	6144.24	4	423.714	5733.21	4	443.404	5831.86	4	535.142	1633.27	1	375.464	5866.74	4	392.503	5631.35	4	401.892	5778.65	4	536.046	1636.07	1	378.301	5842.93	4	388.198	5681.26	4	395.525	5706.03	4	370.263	5584.3	4	382.931	6007.92
394.961	5729.54	4	391.131	5540.7	4	401.345	5767.18	4	543.432	1719.48	1	422.313	5816.93	4	423.725	5530.98	4	443.409	5454.21	4	535.158	1582.99	1	375.511	6002.34	4	392.531	6008.64	4	401.912	5788.63	4	536.081	1530.93	1	378.386	5719.05	4	388.207	5718.13	4	395.539	5496.98	4	370.321	5774.44	4	382.968	5932.21
394.963	5571.08	4	391.143	6014.46	4	401.383	5547.91	4	543.435	1695.33	1	422.319	5340.62	4	423.877	5887.59	4	443.42	5833.18	4	535.185	1655.29	1	375.514	5499.65	4	392.532	5490.29	4	401.922	5841.6	4	536.127	1658.16	1	378.389	5558.84	4	388.254	6303.62	4	395.562	6242.24	4	370.324	5799.74	4	383.162	5644.93
395.002	5541.75	4	391.146	5576.61	4	401.431	5907.19	4	543.442	1664.74	1	422.347	5609.38	4	423.882	5718.88	4	443.431	5803.23	4	535.198	1688.38	1	375.541	5807.74	4	392.567	5897.84	4	401.983	5570.66	4	536.146	1621.49	1	378.425	5535.3	4	388.296	6153.43	4	395.586	5614.24	4	370.329	5641.94	4	383.187	5936.81
395.026	5724.35	4	391.162	6071.75	4	401.543	5678.43	4	543.461	1696.93	1	422.406	5607.65	4	423.889	6248.92	4	443.54	5606.47	4	535.203	1624.9	1	375.545	6141.46	4	392.572	5620.44	4	401.988	5694.69	4	536.187	1638.25	1	378.437	6177.34	4	388.302	5980.71	4	395.594	5762.83	4	370.388	5714.97	4	383.222	5616.19
395.061	5561.13	4	391.189	6080.36	4	401.558	5928.19	4	543.467	1696.71	1	422.447	6016.7	4	423.953	5645.69	4	443.551	5713.5	4	535.203	1699.42	1	375.584	6104.31	4	392.575	5745.72	4	402.021	5699.9	4	536.194	1726.83	1	378.444	5836.81	4	388.327	5564	4	395.6	6009.92	4	370.407	5546.21	4	383.252	5940.05
395.171	5449.12	4	391.198	5794.26	4	401.592	6386.94	4	543.47	1691.88	1	422.479	5691.23	4	423.989	5652.36	4	443.559	5633.31	4	535.211	1650.41	1	375.586	5595.82	4	392.578	5842.62	4	402.035	5473.73	4	536.196	1599.81	1	378.463	5790.35	4	388.331	5592.76	4	395.618	5517.85	4	370.482	5908.99	4	383.285	5803.6
395.201	5590.52	4	391.198	5631.39	4	401.605	6061.66	4	543.48	1557.39	1	422.583	5661.56	4	424.005	5775.78	4	443.629	5622.15	4	535.219	1590.54	1	375.587	5713.1	4	392.583	5657.87	4	402.059	5981.42	4	536.202	1664.61	1	378.494	5908.66	4	388.35	5865.88	4	395.654	5528.37	4	370.505	5777.74	4	383.308	5816.04
395.211	5982.95	4	391.218	5644.34	4	401.609	6006.75	4	543.485	1585.72	1	422.607	5842.64	4	424.152	5621.71	4	443.725	5906.13	4	535.227	1662.69	1	375.603	5828.74	4	392.601	5710.42	4	402.09	5706.04	4	536.219	1637.85	1	378.498	6081.49	4	388.358	6271.98	4	395.681	5838.99	4	370.579	6004.44	4	383.316	5792.53
395.258	5735.72	4	391.23	5589.35	4	401.631	5819.51	4	543.491	1699.5	1	422.636	5662.83	4	424.166	5664.48	4	443.75	5792.8	4	535.28	1585.49	1	375.631	6109.15	4	392.605	5790.55	4	402.149	6142.86	4	536.226	1623.73	1	378.569	5848.2	4	388.364	5467.14	4	395.697	5779.79	4	370.619	5880.98	4	383.348	5704.88
395.259	6083.39	4	391.243	5670.85	4	401.637	6002.58	4	543.499	1583.91	1	422.688	5675.97	4	424.208	5936.69	4	443.841	5605.57	4	535.319	1681.5	1	375.639	5750.31	4	392.613	5612.15	4	402.161	5716.77	4	536.251	1593.16	1	378.575	5855.04	4	388.37	5624.82	4	395.748	5944.57	4	370.651	5699.18	4	383.383	5712.57
395.262	5394.23	4	391.246	5857.65	4	401.698	5951.11	4	543.505	1557.09	1	422.746	5816.61	4	424.302	5632.7	4	443.843	5682.45	4	535.387	1712.03	1	375.705	6393.54	4	392.622	5818.2	4	402.182	5787.16	4	536.253	1603.83	1	378.595	5612.46	4	388.375	5677.43	4	395.774	5823.88	4	370.688	5864.19	4	383.391	5871.49
395.287	5591.29	4	391.276	5528.21	4	401.713	5870.05	4	543.525	1605.31	1	422.776	5638.96	4	424.303	5336.23	4	443.846	5904.63	4	535.388	1680.44	1	375.729	5650.71	4	392.636	5860.26	4	402.209	5839.31	4	536.254	1751.38	1	378.605	5714.16	4	388.393	5918.53	4	395.78	5788.53	4	370.699	5879.5	4	383.413	5624.15
395.303	5598.29	4	391.282	5677.98	4	401.742	5704.7	4	543.532	1616.17	1	422.873	6108.93	4	424.315	5900.36	4	443.848	5683.87	4	535.439	1697.24	1	375.752	5696.68	4	392.714	5777.01	4	402.217	5720.33	4	536.256	1776.44	1	378.698	5852.19	4	388.395	5655.83	4	395.788	5750.65	4	370.769	5821.7	4	383.418	5680.98
395.361	5846.65	4	391.301	5900.72	4	401.823	5736.28	4	543.55	1651.02	1	423.072	6034.34	4	424.361	5618.87	4	443.876	5737.01	4	535.443	1647.18	1	375.821	5659.54	4	392.806	5782.58	4	402.223	5905.02	4	536.27	1604.61	1	378.701	5995.51	4	388.417	6415.47	4	395.798	6178.57	4	370.831	5707.79	4	383.419	5996.25
395.43	5644.6	4	391.35	5636.5	4	401.84	5593.22	4	543.57	1774.96	1	423.095	5719.19	4	424.47	6056.74	4	443.928	5620.63	4	535.467	1625.74	1	375.851	6219.41	4	392.807	5823.84	4	402.231	5785.13	4	536.305	1717.62	1	378.738	5883.63	4	388.45	5609.25	4	395.814	5519.19	4	370.844	5822.59	4	383.444	6005.73
395.486	5472.88	4	391.388	5889.45	4	401.883	6027.03	4	543.575	1686.84	1	423.115	5639.83	4	424.499	6074.78	4	443.971	5646.73	4	535.488	1739.03	1	375.86	6152.94	4	392.816	5531.62	4	402.277	5661.04	4	536.32	1632.9	1	378.775	6173	4	388.458	6171.94	4	395.865	5694.23	4	370.872	5857.49	4	383.484	5663.02
395.537	5839.73	4	391.431	5759.95	4	401.903	5709.21	4	543.583	1614.92	1	423.134	5715.93	4	424.525	6091.88	4	443.975	6201.07	4	535.507	1683.17	1	375.866	5712.42	4	392.897	5773.08	4	402.297	5947.85	4	536.329	1711.42	1	378.861	5886.36	4	388.464	5966.36	4	395.869	5812.42	4	370.907	5821.65	4	383.503	6059.21
395.582	5882.6	4	391.46	6079.27	4	401.929	5761.7	4	543.588	1664.96	1	423.187	5924.38	4	424.551	5814.49	4	443.995	5659.52	4	535.577	1588.05	1	375.871	6208.52	4	392.92	5707.88	4	402.304	6217.7	4	536.34	1671.93	1	378.891	5684.81	4	388.543	5685.96	4	395.887	5998.41	4	370.927	5520.17	4	383.517	5437.37
395.589	5644.71	4	391.539	5533.83	4	401.943	5687.94	4	543.59	1646.1	1	423.282	5568.83	4	424.597	5779.94	4	444	6005.96	4	535.577	1599.65	1	375.878	5952.48	4	392.956	6119.16	4	402.313	5570.74	4	536.343	1625.28	1	378.941	6012.45	4	388.555	5630.33	4	395.891	5911.42	4	370.938	5800.09	4	383.52	5671.29
395.66	5897.76	4	391.548	6027.36	4	401.949	5847.84	4	543.604	1684.48	1	423.388	5890.52	4	424.705	5570.95	4	444.004	5635.4	4	535.578	1589.22	1	375.933	5616.39	4	392.966	5763.58	4	402.318	6011.95	4	536.354	1663.95	1	378.969	5744.72	4	388.577	6032.24	4	395.894	6329.21	4	370.953	5674.88	4	383.534	5434.13
395.666	5605.92	4	391.578	5907.97	4	401.97	6045.24	4	543.605	1729.63	1	423.405	5724.31	4	424.735	5623.74	4	444.072	5625.35	4	535.614	1696.29	1	375.935	5824.56	4	392.985	5961.7	4	402.319	5782.67	4	536.363	1634.75	1	378.974	5740.9	4	388.613	5584.41	4	395.928	5665.99	4	370.967	5723.38	4	383.595	5603.18
395.69	5715.58	4	391.591	5721.81	4	401.971	5825.16	4	543.636	1636.71	1	423.447	5730	4	424.748	6177.19	4	444.127	5838.12	4	535.656	1627.43	1	375.998	6032.51	4	393.008	5696.65	4	402.355	6095.33	4	536.365	1702.46	1	379.002	5774.57	4	388.649	5736.62	4	395.954	5729.84	4	370.994	5888.13	4	383.608	5726.09
395.718	5527.85	4	391.695	5605.14	4	401.981	5839.3	4	543.657	1602.06	1	423.478	5673.51	4	424.78	5608.6	4	444.172	5572.5	4	535.666	1630.19	1	376.029	6256.84	4	393.024	5680.17	4	402.404	5808.05	4	536.399	1635.54	1	379.031	5891.87	4	388.654	5769.44	4	395.966	6214.01	4	370.995	5724.95	4	383.652	5877.4
395.763	6139.36	4	391.703	6364.56	4	401.985	5699.45	4	543.724	1713.89	1	423.507	5865.6	4	424.798	5661.77	4	444.233	5496.88	4	535.678	1525.09	1	376.045	6350.27	4	393.04	5552.73	4	402.413	5818	4	536.411	1596.7	1	379.117	5638.86	4	388.654	6319.02	4	395.984	5799.59	4	370.996	5923.47	4	383.687	6021.08
395.77	5704.57	4	391.716	5758.26	4	402.004	5728.09	4	543.729	1572.8	1	423.528	5684.5	4	424.836	5439.93	4	444.244	5969.91	4	535.7	1694.83	1	376.086	5991.44	4	393.073	5683.91	4	402.424	5831.39	4	536.445	1660.03	1	379.122	5460.34	4	388.698	5641.66	4	395.993	5675.62	4	370.996	5744.25	4	383.71	5883.68
395.771	5902.38	4	391.735	5529.54	4	402.008	5698.33	4	543.744	1636.27	1	423.699	5729.7	4	424.853	5909.57	4	444.273	5485.6	4	535.712	1668.17	1	376.139	6135.24	4	393.101	5761.09	4	402.437	5806.01	4	536.447	1659.93	1	379.123	5638.51	4	388.701	5769.52	4	396.001	6125.17	4	371.034	5930.82	4	383.72	5748.69
395.8	5724.75	4	391.736	5859.51	4	402.02	5669.62	4	543.759	1666.85	1	423.724	5507.74	4	424.888	5764.16	4	444.399	5606.32	4	535.72	1547.92	1	376.177	5869.17	4	393.153	5962.52	4	402.504	6158.28	4	536.448	1669.83	1	379.143	5973.39	4	388.704	5882.69	4	396.02	5701.71	4	371.039	5805.82	4	383.761	6285.43
395.845	5707.02	4	391.758	5723.77	4	402.039	5699.73	4	543.763	1697.45	1	423.733	5918.77	4	424.898	5592.1	4	444.405	5751.21	4	535.725	1579.81	1	376.213	6010.45	4	393.232	5719.63	4	402.541	5710.89	4	536.452	1723.03	1	379.18	6021.16	4	388.713	6051.37	4	396.035	5720.55	4	371.057	5712.3	4	383.852	5757.79
395.859	5649.46	4	391.85	6093.2	4	402.078	5761.66	4	543.81	1812.01	1	423.888	5753.73	4	424.919	5468.03	4	444.443	5646.06	4	535.763	1683.45	1	376.227	5596.35	4	393.253	5889.24	4	402.551	5746.33	4	536.496	1620.55	1	379.2	6008	4	388.718	5492.68	4	396.037	5608.12	4	371.064	5655.69	4	383.872	6185.29
395.909	5601.25	4	391.876	5552.66	4	402.141	5692.12	4	543.827	1593.14	1	423.907	5972.28	4	424.923	5853.78	4	444.537	5688.53	4	535.781	1667.72	1	376.236	5565.18	4	393.291	5787.12	4	402.624	5790.8	4	536.517	1679.13	1	379.208	5636.18	4	388.721	6234.23	4	396.078	5721.74	4	371.069	5782.84	4	383.885	5780.41
395.948	5976.35	4	391.887	5625.69	4	402.152	5791.41	4	543.857	1613.08	1	423.947	5643.25	4	424.926	5522.79	4	444.632	5724.94	4	535.782	1766.75	1	376.294	5870.71	4	393.327	5470.12	4	402.626	6023.59	4	536.518	1511.67	1	379.22	5914.16	4	388.757	5628.15	4	396.12	5971.71	4	371.127	5591.02	4	383.901	5286.91
396.011	6223.94	4	391.901	5729.73	4	402.184	5812.5	4	543.858	1584.71	1	424.245	5559.82	4	424.95	5319.03	4	444.633	6168.5	4	535.785	1525.98	1	376.298	5737.56	4	393.357	5861.19	4	402.633	5657.97	4	536.527	1791.2	1	379.23	5786.07	4	388.778	5644.91	4	396.144	5911.39	4	371.128	5883.82	4	383.902	6264.48
396.034	5661.16	4	391.918	6049.73	4	402.187	5670.01	4	543.88	1671.08	1	424.516	5757.09	4	424.988	5902.24	4	444.804	5658.38	4	535.791	1677.41	1	376.302	5646.36	4	393.36	5766.37	4	402.642	5715.4	4	536.528	1568.24	1	379.295	5649.25	4	388.807	5521.11	4	396.144	5783.56	4	371.156	6224.47	4	384.031	6253.05
396.05	5486.28	4	391.929	5571.07	4	402.243	5851.3	4	543.941	1725	1	424.555	5707.63	4	424.992	5620.01	4	444.867	5467.9	4	535.799	1617.03	1	376.376	5920.49	4	393.383	5576.29	4	402.649	5596.82	4	536.563	1789.49	1	379.298	5785.19	4	388.876	5669.61	4	396.149	5703.77	4	371.191	5613.46	4	384.068	5732.7
396.054	5900.69	4	391.933	5528.25	4	402.274	6188.32	4	543.96	1543.66	1	424.639	5818.78	4	425.044	5766.05	4	444.87	5595.8	4	535.839	1661.47	1	376.377	5695.42	4	393.389	5614.76	4	402.661	5883.45	4	536.6	1655.45	1	379.309	6222.19	4	388.913	5823.58	4	396.192	5887.03	4	371.198	5867.52	4	384.075	5729.75
396.18	6041.81	4	391.94	5649.17	4	402.28	5710.31	4	544.016	1634.51	1	424.769	5684.86	4	425.096	5635.19	4	444.923	5817.88	4	535.859	1582.14	1	376.378	5598.8	4	393.421	5583.68	4	402.708	5782.61	4	536.652	1557.51	1	379.317	6020.81	4	388.914	5768.66	4	396.197	6037.83	4	371.206	5695.46	4	384.076	5629.85
396.192	5671.27	4	391.943	6236.43	4	402.304	5806.98	4	544.024	1500.58	1	424.773	5865.2	4	425.101	5678.88	4	444.94	5617.12	4	535.874	1632.67	1	376.439	5623.88	4	393.423	5728.16	4	402.73	5714.54	4	536.654	1671.84	1	379.501	5679.16	4	388.932	6305.69	4	396.2	5680.79	4	371.237	5746.26	4	384.089	5719.57
396.197	5643.61	4	391.956	6269.79	4	402.32	5911.86	4	544.032	1646.56	1	424.875	5839.57	4	425.112	5735.22	4	445.013	6041.6	4	535.875	1668.42	1	376.451	6073.7	4	393.427	5922.12	4	402.748	5780.03	4	536.661	1767.71	1	379.502	5684.81	4	388.947	5941.23	4	396.216	5639.72	4	371.25	5645.18	4	384.101	5788.68
396.199	5554.15	4	391.958	5698.34	4	402.372	5894.73	4	544.055	1651.71	1	424.917	5930.97	4	425.187	6159.68	4	445.04	5595.89	4	535.882	1673.27	1	376.456	5909.51	4	393.452	6323.33	4	402.771	5704.81	4	536.708	1602.46	1	379.507	5858.93	4	388.949	5987.25	4	396.252	5842.03	4	371.268	5760.11	4	384.101	5724.22
396.207	5771.77	4	391.988	6111.2	4	402.43	5727.66	4	544.101	1596.24	1	424.966	5563.25	4	425.219	5464.73	4	445.04	5677.31	4	535.914	1619.71	1	376.488	6003.07	4	393.454	5904.28	4	402.775	5801.14	4	536.742	1662.64	1	379.515	5806.65	4	389.099	5811.97	4	396.276	5823.91	4	371.268	5573.49	4	384.112	5827.56
396.262	5607.74	4	392.04	5683.58	4	402.436	5618.19	4	544.106	1629.26	1	424.972	5734.83	4	425.298	5730.95	4	445.055	5714.74	4	535.977	1650.99	1	376.489	5921.15	4	393.485	5869.82	4	402.822	5811.48	4	536.745	1655.11	1	379.535	5605.16	4	389.104	5721.4	4	396.284	5726.79	4	371.298	5696.14	4	384.125	5572.01
396.308	5583.1	4	392.078	6044.42	4	402.543	5622.85	4	544.126	1664.67	1	425.123	5503.77	4	425.338	5566.42	4	445.088	5414.22	4	535.987	1599.61	1	376.545	6032.69	4	393.58	5566.75	4	402.931	6116.83	4	536.766	1690.49	1	379.536	6054.23	4	389.17	5841.11	4	396.331	6301.23	4	371.312	5659.06	4	384.135	5674.7
396.309	5681.15	4	392.084	5880.97	4	402.55	5881.72	4	544.137	1663.64	1	425.15	5784.42	4	425.357	5637.36	4	445.09	5344.42	4	535.988	1655.81	1	376.63	5922.51	4	393.581	5706.61	4	402.939	5653.14	4	536.785	1637.95	1	379.56	5848.29	4	389.203	5748.9	4	396.34	6010.47	4	371.32	5887.54	4	384.141	5725.32
396.354	6158.72	4	392.105	5670.42	4	402.551	5609.06	4	544.147	1667.07	1	425.197	5698.67	4	425.387	5636.16	4	445.103	5593.25	4	536.014	1582.06	1	376.645	6060.22	4	393.608	6169.53	4	402.947	5746.63	4	536.787	1579.74	1	379.579	5901.42	4	389.211	5817.48	4	396.356	5561.37	4	371.322	5940.18	4	384.201	5846.8
396.456	5748.86	4	392.132	6163.73	4	402.609	5772.82	4	544.174	1669.36	1	425.312	5777.05	4	425.433	5614.42	4	445.143	5719.51	4	536.021	1637.98	1	376.661	5789.04	4	393.627	6237.12	4	402.962	5653.03	4	536.801	1607.6	1	379.636	5719.46	4	389.293	5742.72	4	396.374	5940.58	4	371.35	5855.97	4	384.201	5838.27
396.524	5454.27	4	392.139	5699.59	4	402.655	6008.1	4	544.192	1796.75	1	425.316	5590.41	4	425.464	5596.9	4	445.191	6005.39	4	536.03	1612.59	1	376.669	5629.2	4	393.645	5774.13	4	403.018	5674.72	4	536.843	1616.81	1	379.676	5821.89	4	389.298	5786.68	4	396.39	5955.91	4	371.362	5624.26	4	384.239	5684.36
396.592	5618.67	4	392.166	5672.11	4	402.68	6026.54	4	544.211	1735.98	1	425.347	5449.43	4	425.483	5834.03	4	445.199	5301.14	4	536.03	1582.43	1	376.706	5708.79	4	393.655	6457.23	4	403.024	5982.95	4	536.87	1709.18	1	379.738	5850.05	4	389.3	5779.98	4	396.445	5539.62	4	371.363	5764.01	4	384.254	5905.66
396.621	5554.64	4	392.179	5764.91	4	402.695	5793.13	4	544.219	1754.57	1	425.371	5541.96	4	425.515	5873.41	4	445.227	5640.38	4	536.037	1777.6	1	376.726	5783.05	4	393.655	5865.8	4	403.046	6096.53	4	536.893	1623.15	1	379.778	5945.45	4	389.31	5605.66	4	396.458	5929.02	4	371.367	5875.38	4	384.279	5617.52
396.633	6009.78	4	392.2	5744.36	4	402.697	5687.09	4	544.229	1706.44	1	425.389	5613.83	4	425.521	5651.76	4	445.283	5899.5	4	536.112	1676.97	1	376.739	5530.98	4	393.7	5688.29	4	403.07	5621.62	4	536.917	1728.5	1	379.789	6204.4	4	389.326	5916.44	4	396.465	5994.52	4	371.375	5640.31	4	384.301	5751.44
396.741	5492.97	4	392.201	5606.42	4	402.716	5577.44	4	544.24	1609.17	1	425.475	6300.37	4	425.572	5386.04	4	445.306	5601.08	4	536.132	1577.67	1	376.749	6274.52	4	393.732	5443.93	4	403.07	5708.66	4	536.937	1677.41	1	379.826	6239.85	4	389.328	5587.13	4	396.498	6324.75	4	371.395	5786.19	4	384.309	5827.08
396.741	5757.2	4	392.211	5732.48	4	402.737	5783.99	4	544.297	1627.41	1	425.486	5596.71	4	425.575	5889.11	4	445.381	5822.27	4	536.145	1579.88	1	376.758	5766.3	4	393.828	5999.55	4	403.103	6196.94	4	536.939	1608.5	1	379.829	5648.23	4	389.36	5831.78	4	396.518	5895.12	4	371.396	5805.47	4	384.327	5743.36
396.745	5659.35	4	392.226	5662.64	4	402.758	5576.1	4	544.318	1830.03	1	425.497	5756.45	4	425.581	5644.93	4	445.396	5636.39	4	536.148	1860.3	1	376.759	6474.51	4	393.834	5716.04	4	403.112	6131.41	4	536.95	1684.36	1	379.834	5748.95	4	389.395	5619.89	4	396.525	5654.68	4	371.4	5597.6	4	384.354	5588.25
396.78	5499.35	4	392.253	5573.24	4	402.767	5968.39	4	544.329	1688.98	1	425.499	5774.03	4	425.645	5630.03	4	445.448	6022.74	4	536.152	1710.77	1	376.76	5871.01	4	393.892	5707.28	4	403.118	5747.7	4	536.998	1788.38	1	379.838	6417.95	4	389.437	5743.73	4	396.546	5811.47	4	371.425	5636.77	4	384.366	6095.18
396.821	5530.55	4	392.371	6107.65	4	402.803	5891.69	4	544.35	1690.47	1	425.523	5628.84	4	425.692	6102.31	4	445.584	5911.98	4	536.158	1714.14	1	376.792	5785.74	4	393.894	5789.73	4	403.134	5699.44	4	537.01	1627.66	1	379.84	5793.49	4	389.459	5650.44	4	396.547	5497.18	4	371.429	5762.38	4	384.395	5329.91
396.878	5694.79	4	392.383	5834.24	4	402.814	6073.18	4	544.391	1580.41	1	425.556	5752.98	4	425.708	5889.55	4	445.616	5770.11	4	536.219	1799.21	1	376.869	5965.78	4	393.896	5820.34	4	403.165	5731.47	4	537.03	1707.87	1	379.847	5934.77	4	389.539	5730.04	4	396.549	5888.8	4	371.476	5574.87	4	384.431	5508.79
396.883	5922.97	4	392.393	6198.7	4	402.817	5728.18	4	544.418	1653.36	1	425.577	5693.71	4	425.769	5657.19	4	445.665	6146.28	4	536.22	1696.22	1	376.893	5712.42	4	393.91	5839.59	4	403.192	5720.02	4	537.03	1672.94	1	379.849	5586.48	4	389.572	5597.6	4	396.576	5755.32	4	371.533	5614.09	4	384.442	5659.92
396.92	5904.34	4	392.469	5840.44	4	402.821	5721.27	4	544.476	1696.65	1	425.625	5806.15	4	425.818	5583.74	4	445.81	5664.47	4	536.25	1668.03	1	376.917	5670.39	4	393.91	5879.62	4	403.253	5697	4	537.044	1544.28	1	379.875	5892.6	4	389.586	6074.11	4	396.58	5713.58	4	371.567	5810.99	4	384.465	5671.8
396.958	5565.36	4	392.567	5757.76	4	402.824	5564.36	4	544.478	1596.58	1	425.655	6095.97	4	425.835	5742.23	4	445.877	5605.72	4	536.261	1593.53	1	376.943	5624.82	4	393.985	5717.75	4	403.283	5655.71	4	537.046	1619.51	1	379.892	5718.73	4	389.631	5690.46	4	396.594	6072.27	4	371.569	5721.72	4	384.48	5841.79
396.979	5692.94	4	392.572	5678.97	4	402.828	5752.88	4	544.485	1600.82	1	425.812	6041.25	4	425.868	5538.38	4	445.918	5628.07	4	536.264	1601.1	1	376.949	5758.59	4	394.026	5653.76	4	403.296	5659.34	4	537.102	1648.7	1	379.905	5841.22	4	389.645	6490.81	4	396.607	6323.15	4	371.571	5543.94	4	384.488	5737.65
396.982	5735.36	4	392.642	5678.83	4	402.856	5923.73	4	544.489	1613.11	1	425.838	6100.88	4	425.877	5810.58	4	445.985	5516.93	4	536.279	1633.3	1	376.97	5970.19	4	394.036	5757.73	4	403.298	5656.54	4	537.103	1656.82	1	379.952	5752.84	4	389.663	5606.72	4	396.61	5619.45	4	371.594	5749.77	4	384.523	5754.34
397.02	5724.89	4	392.654	6093.99	4	402.887	5635.47	4	544.492	1721.55	1	426.034	5794.84	4	425.883	5718.2	4	446.029	5594.9	4	536.312	1668.14	1	376.993	5473.93	4	394.05	5953.89	4	403.323	5977.07	4	537.106	1596.62	1	379.976	6080.21	4	389.672	6165.93	4	396.614	6004.27	4	371.614	5848.5	4	384.537	5407.87
397.075	6127.75	4	392.672	5818.57	4	402.967	6039.32	4	544.493	1572.71	1	426.058	5663.42	4	425.894	6155.17	4	446.055	5837.2	4	536.316	1635.86	1	377.035	5793.47	4	394.055	5625.15	4	403.36	5959.43	4	537.121	1580.72	1	379.985	5755.05	4	389.688	6051.32	4	396.618	6052.86	4	371.663	6045.04	4	384.551	5478.43
397.085	5841.72	4	392.739	5660.16	4	402.972	5943.74	4	544.518	1496.94	1	426.327	5620.44	4	426.003	5485.21	4	446.158	5654.92	4	536.345	1634.08	1	377.069	5765.63	4	394.101	5456.09	4	403.461	5709.62	4	537.138	1530.96	1	380.069	6149.4	4	389.74	6272.98	4	396.619	5822.46	4	371.706	5746.13	4	384.567	5684.65
397.089	5294.76	4	392.747	5659.94	4	402.989	5722.94	4	544.526	1633.59	1	426.359	5810.22	4	426.049	5603.92	4	446.163	5811.64	4	536.439	1603.46	1	377.149	5809.09	4	394.105	5925.64	4	403.503	5705.43	4	537.199	1587.07	1	380.07	5775.58	4	389.758	6088.83	4	396.628	5608.71	4	371.856	5790.85	4	384.605	5369.05
397.165	6096.17	4	392.748	5865.7	4	403.047	5788.67	4	544.526	1597.7	1	426.359	5434.03	4	426.103	5600.19	4	446.183	5476.3	4	536.442	1711.69	1	377.162	5625.99	4	394.144	5616.27	4	403.515	5709.64	4	537.282	1604.44	1	380.07	5858.59	4	389.771	5681.38	4	396.632	5849.86	4	371.907	6025.18	4	384.609	5755.84
397.178	5747.92	4	392.792	5709.53	4	403.065	5924.39	4	544.533	1579.34	1	426.537	5909.17	4	426.155	5378.48	4	446.196	5723.67	4	536.444	1570.29	1	377.165	5882.84	4	394.213	5957.03	4	403.538	5569.01	4	537.287	1608.07	1	380.097	5758.53	4	389.777	5649.46	4	396.68	5599.72	4	371.945	5562.7	4	384.618	5744.02
397.183	5803.38	4	392.802	5819.66	4	403.1	5840.21	4	544.543	1621.89	1	426.555	5513.75	4	426.167	5460.73	4	446.246	5787.92	4	536.449	1596.68	1	377.186	5488.62	4	394.261	5731.77	4	403.621	5826.69	4	537.294	1657.76	1	380.156	6227.47	4	389.784	5836.19	4	396.705	5983.68	4	371.993	5916.32	4	384.637	5874.7
397.198	5548.19	4	392.9	5682.32	4	403.132	5889.59	4	544.548	1602.12	1	426.584	5831.62	4	426.175	5740.84	4	446.268	5839.58	4	536.458	1603.49	1	377.201	5748.33	4	394.312	5783.74	4	403.652	5564.31	4	537.301	1512.78	1	380.158	5969.28	4	389.791	5855.04	4	396.714	5983.47	4	372.009	5553.02	4	384.642	5875.01
397.221	5716.76	4	392.932	5790.84	4	403.205	5505.33	4	544.555	1637.2	1	426.62	5882.63	4	426.185	5637.03	4	446.272	5639.15	4	536.471	1679.27	1	377.269	5801.09	4	394.326	5779.47	4	403.661	5508.81	4	537.311	1653.51	1	380.202	5704.04	4	389.798	5625.2	4	396.74	5716.26	4	372.029	5793.72	4	384.652	5702.31
397.223	5303.71	4	392.943	5577.22	4	403.216	5650.37	4	544.564	1660.02	1	426.633	5728.63	4	426.229	5712.55	4	446.294	6007.2	4	536.477	1697.54	1	377.291	6087.38	4	394.329	5410.12	4	403.694	5844.42	4	537.319	1660.41	1	380.205	5619.98	4	389.826	5633.24	4	396.769	6048.78	4	372.039	6032.48	4	384.666	5796.37
397.254	5486.81	4	392.951	5711.81	4	403.231	5532.46	4	544.587	1603.64	1	426.664	6010.24	4	426.236	5699.64	4	446.308	5601.71	4	536.478	1720.23	1	377.306	5617.57	4	394.334	5794.98	4	403.741	5854.87	4	537.322	1805.92	1	380.229	5693.23	4	389.853	5562.63	4	396.774	5637.63	4	372.081	5629.14	4	384.667	6012.62
397.269	5889.7	4	393.008	5809.62	4	403.251	5384.22	4	544.625	1670.66	1	426.69	5524.77	4	426.283	5675.52	4	446.35	5878.92	4	536.515	1685.47	1	377.317	6021.16	4	394.365	5767.74	4	403.762	5630.83	4	537.372	1639.85	1	380.232	5857	4	389.855	5851.65	4	396.779	6169.71	4	372.103	6318.21	4	384.683	5198.36
397.317	6063.14	4	393.008	5489.28	4	403.259	5693.42	4	544.632	1788.85	1	426.699	5711.3	4	426.296	5405.67	4	446.379	5831.62	4	536.517	1631.47	1	377.331	5722.4	4	394.365	6030.28	4	403.769	5745.73	4	537.417	1673.95	1	380.265	5704.58	4	389.859	5826.06	4	396.794	5782.65	4	372.108	5884.55	4	384.695	5636.19
397.355	5734.9	4	393.017	5654.43	4	403.27	5739.47	4	544.634	1538.19	1	426.743	5608.05	4	426.437	5537.03	4	446.434	5605.28	4	536.517	1583.13	1	377.342	5719.1	4	394.434	5644.75	4	403.807	5643.32	4	537.419	1700.23	1	380.314	6041.56	4	389.904	5690.46	4	396.798	5617.64	4	372.117	5676.26	4	384.697	5611.58
397.356	6032	4	393.03	5804.25	4	403.288	5976.5	4	544.65	1653.09	1	426.969	5526.39	4	426.561	5736.16	4	446.463	5664.39	4	536.525	1581.87	1	377.345	6249.92	4	394.434	5860.67	4	403.836	5780.29	4	537.464	1527.98	1	380.343	5778.71	4	389.928	5813.02	4	396.902	5510.58	4	372.12	5708.64	4	384.718	5739.45
397.37	6088.24	4	393.043	6011.3	4	403.366	5626.66	4	544.658	1658.6	1	427.072	5900.26	4	426.606	5760.39	4	446.577	5650.84	4	536.541	1627.89	1	377.359	5953.08	4	394.447	5674.08	4	403.894	5518.51	4	537.467	1545.72	1	380.348	5822.82	4	389.932	5872.34	4	396.912	6121.94	4	372.161	5605.84	4	384.756	5643
397.373	5770.03	4	393.08	5619.9	4	403.375	5782.03	4	544.676	1545.11	1	427.225	5758.42	4	426.689	5627.24	4	446.619	5707.72	4	536.56	1711.89	1	377.374	5560.54	4	394.467	5712.94	4	403.907	5712.11	4	537.477	1704.02	1	380.351	5710.54	4	389.943	5740.16	4	396.925	5809.24	4	372.179	5537.29	4	384.816	6047.04
397.407	5897.96	4	393.08	5838.32	4	403.399	5980.29	4	544.762	1669.48	1	427.285	6013.71	4	426.711	5942.91	4	446.626	5835.74	4	536.618	1591.35	1	377.41	5824.2	4	394.469	5795.58	4	403.922	6298.49	4	537.497	1726.08	1	380.356	5611.54	4	389.96	5835.27	4	396.948	6115.47	4	372.236	5809.52	4	384.832	6095.01
397.445	5650.67	4	393.087	5960.44	4	403.404	5669.32	4	544.806	1624.85	1	427.296	5710.91	4	426.733	5713.33	4	446.775	5733.97	4	536.627	1596.39	1	377.496	5811.96	4	394.479	5840.56	4	403.922	6415.86	4	537.501	1535.93	1	380.366	5850.16	4	389.963	6299.97	4	397.056	5645.87	4	372.266	5653.16	4	384.88	6191.86
397.479	5455.97	4	393.108	5879.44	4	403.433	5806.53	4	544.88	1604.96	1	427.326	5587.18	4	426.757	5776.36	4	446.812	5574.95	4	536.637	1598.49	1	377.506	5943.36	4	394.493	5806.93	4	403.935	5829.49	4	537.537	1605.93	1	380.41	5915.09	4	389.966	5902.98	4	397.063	5660.94	4	372.271	6169.81	4	384.899	5619.43
397.523	5922.02	4	393.108	5643.58	4	403.448	5939.35	4	544.9	1644.96	1	427.346	5832.24	4	426.846	6092.86	4	446.822	6259.87	4	536.655	1584.92	1	377.574	5736.61	4	394.497	5743.96	4	403.97	5835.29	4	537.557	1639.01	1	380.423	6097.03	4	389.998	5896.39	4	397.079	5673.03	4	372.284	5705.14	4	384.941	6055.94
397.582	6035.23	4	393.167	5591.94	4	403.473	5923.71	4	545	1713.83	1	427.406	5694.51	4	426.907	5718.32	4	446.842	5454.05	4	536.674	1651.57	1	377.583	6192.14	4	394.514	5618.02	4	403.971	5763.59	4	537.568	1605.45	1	380.479	5976.75	4	390.032	5956.04	4	397.114	5745.36	4	372.322	5648.01	4	384.998	6210.19
397.617	6001.27	4	393.206	5957.72	4	403.537	5609.72	4	545.016	1672.49	1	427.427	5869.5	4	426.919	5549.73	4	446.861	5602.89	4	536.678	1617.36	1	377.608	6080.74	4	394.52	5649	4	403.985	5722.05	4	537.575	1686.44	1	380.51	6140.03	4	390.032	6085.16	4	397.125	5613.97	4	372.336	5889.31	4	385	5598.48
397.627	5586.72	4	393.222	5844.46	4	403.551	5612.24	4	545.033	1664.3	1	427.438	5843.4	4	426.944	5802.15	4	446.968	5553.63	4	536.68	1701.74	1	377.644	5645.51	4	394.544	5706.37	4	403.987	5938.39	4	537.586	1612.79	1	380.59	5940.64	4	390.071	6172.24	4	397.157	5872.44	4	372.338	5669.11	4	385.017	5625.74
397.631	6117.88	4	393.226	5532.87	4	403.623	5351.99	4	545.048	1597.59	1	427.483	5762.86	4	427.055	5743.43	4	447.008	5937.76	4	536.705	1659.98	1	377.649	5564.85	4	394.55	5805.25	4	404.02	6112.48	4	537.665	1586.95	1	380.595	5733.43	4	390.071	5574.81	4	397.161	5725.7	4	372.34	5769.02	4	385.098	5730.12
397.646	5774.21	4	393.231	5687.29	4	403.648	5626.65	4	545.085	1584.01	1	427.533	5644.36	4	427.062	5663.13	4	447.011	5691.74	4	536.727	1634.33	1	377.672	5893.94	4	394.57	5692.05	4	404.038	5973.49	4	537.666	1639.46	1	380.659	5837.11	4	390.12	6207.56	4	397.192	5787.62	4	372.447	5962.16	4	385.123	5643.75
397.668	5599.5	4	393.245	6218.03	4	403.711	5587.89	4	545.152	1808.45	1	427.608	5999.73	4	427.165	5651.87	4	447.067	5740.41	4	536.744	1751.11	1	377.674	6159.02	4	394.571	5789.49	4	404.062	6155.64	4	537.684	1601.01	1	380.682	5963.17	4	390.14	5499.07	4	397.236	6057.43	4	372.459	5771.17	4	385.126	5907.86
397.796	5379.47	4	393.327	5794.3	4	403.813	5473.08	4	545.19	1620.71	1	427.61	5927.77	4	427.185	6050.5	4	447.078	6133.19	4	536.749	1664.81	1	377.71	5810.7	4	394.575	6039.05	4	404.105	5880	4	537.693	1630.29	1	380.685	5677.76	4	390.155	6063.21	4	397.236	5767.13	4	372.469	5874.75	4	385.171	5912.55
397.832	5918.49	4	393.39	5830.44	4	403.829	6188.86	4	545.2	1619.17	1	427.671	5481.58	4	427.195	5768.8	4	447.139	5684.75	4	536.751	1699.92	1	377.779	6133.59	4	394.591	5560.2	4	404.126	5651.5	4	537.713	1657.49	1	380.732	6389.65	4	390.156	5743.5	4	397.265	5593.49	4	372.476	5524.5	4	385.174	5816.84
397.896	5768.33	4	393.416	5523.41	4	403.831	5751.37	4	545.235	1552.77	1	427.716	5761.16	4	427.215	5624.15	4	447.196	5915.08	4	536.766	1517.41	1	377.794	5773.74	4	394.663	5893.79	4	404.147	5657.93	4	537.747	1681.9	1	380.738	5746.62	4	390.194	6005	4	397.302	6097.95	4	372.543	5768.49	4	385.193	5806.66
397.906	5796.98	4	393.43	5657.21	4	403.858	5537.9	4	545.246	1630.01	1	427.726	5528.97	4	427.232	5735.86	4	447.293	5397.89	4	536.852	1744.98	1	377.852	6167.01	4	394.665	5845.91	4	404.179	5906.77	4	537.751	1715.22	1	380.742	5927.93	4	390.197	5825.27	4	397.349	5561.98	4	372.584	5761.65	4	385.214	5847.36
397.944	5707.89	4	393.477	5672.41	4	403.865	5584.1	4	545.305	1593.54	1	427.844	5638.19	4	427.237	5595.44	4	447.309	5739.88	4	536.853	1613.61	1	377.862	5741.04	4	394.667	6005.9	4	404.213	5648.03	4	537.776	1639.03	1	380.775	6236.82	4	390.201	5801.54	4	397.355	5709.88	4	372.591	5888.78	4	385.262	5578.31
397.962	6103.57	4	393.5	5850.19	4	403.868	6288.83	4	545.33	1585.16	1	427.891	5666.37	4	427.252	5573.45	4	447.363	6044.58	4	536.863	1579.19	1	377.899	6001.1	4	394.696	5967.98	4	404.216	5927.7	4	537.788	1639.12	1	380.866	5787.57	4	390.23	6144.73	4	397.368	6041.4	4	372.611	5931.19	4	385.266	5704.32
398.031	5943.53	4	393.531	5935.69	4	403.87	5703.3	4	545.343	1600.68	1	427.971	5656.7	4	427.255	5589.29	4	447.417	5482.39	4	536.871	1579.54	1	377.901	6072.69	4	394.7	5564.56	4	404.22	6063.26	4	537.856	1594.09	1	380.931	5874.76	4	390.249	5584.4	4	397.41	5850.09	4	372.615	5738.03	4	385.297	5655
398.086	5569.47	4	393.562	6301.89	4	403.915	6157.14	4	545.371	1621.45	1	427.982	5701.1	4	427.257	5754.46	4	447.436	5494.95	4	536.896	1682.74	1	377.903	5849.52	4	394.709	5678.4	4	404.268	5790.21	4	537.863	1651.12	1	380.962	5483.71	4	390.25	5640.43	4	397.412	6074.56	4	372.701	5692.46	4	385.314	5722.09
398.107	5930.9	4	393.571	6473.62	4	403.922	5609.08	4	545.379	1735.01	1	428.005	5947.51	4	427.28	5687.28	4	447.445	6180.48	4	536.937	1565.19	1	377.918	5820.44	4	394.77	6038.3	4	404.268	5715.68	4	537.876	1722.98	1	380.974	5708.98	4	390.267	5671.34	4	397.429	5694.79	4	372.721	5673.69	4	385.322	5573.87
398.125	5628.21	4	393.595	5786.02	4	403.988	5699.75	4	545.379	1631.03	1	428.041	5739.9	4	427.333	6105.02	4	447.458	5519.47	4	536.94	1542.94	1	377.987	5737.77	4	394.774	5887.17	4	404.271	5967.76	4	537.925	1713.5	1	380.976	5949.88	4	390.314	5845.77	4	397.452	5935.14	4	372.73	5728.18	4	385.333	5670.29
398.127	5637.32	4	393.598	5671.6	4	403.99	5846.9	4	545.387	1778.36	1	428.08	5762.46	4	427.453	5327.89	4	447.481	5732.13	4	536.957	1541.94	1	378.002	5792.45	4	394.781	5774.83	4	404.35	5498.9	4	537.931	1585.84	1	381.008	5491.65	4	390.318	5999.65	4	397.455	5708.14	4	372.737	5689.11	4	385.341	5695.71
398.139	5630.22	4	393.612	5749.75	4	404.045	5798.58	4	545.399	1714.6	1	428.13	5689.47	4	427.466	6052.26	4	447.608	5899.25	4	536.969	1595.48	1	378.012	6051.12	4	394.798	6195.67	4	404.414	6165.81	4	537.965	1601.95	1	381.012	5990.05	4	390.363	5594.39	4	397.472	5953.72	4	372.825	5669.56	4	385.365	5596.67
398.16	5635.74	4	393.614	6214.73	4	404.05	5801.78	4	545.407	1549.34	1	428.199	5737.02	4	427.475	5536.15	4	447.624	5595.68	4	536.977	1628.61	1	378.06	5658.73	4	394.804	5664.5	4	404.414	5508	4	537.967	1607.28	1	381.06	5758.13	4	390.383	5755.28	4	397.508	5655.69	4	372.864	5902.08	4	385.369	5532.34
398.214	5863.07	4	393.618	5581.79	4	404.07	5798.92	4	545.42	1590.38	1	428.334	5765.14	4	427.511	5827.86	4	447.635	5600.73	4	536.978	1701.63	1	378.067	5667.32	4	394.834	5617.35	4	404.424	6007.91	4	537.986	1642.19	1	381.062	5815.51	4	390.428	6054.37	4	397.525	5696.13	4	372.885	5666.57	4	385.421	5652.88
398.242	5523.29	4	393.634	5437.31	4	404.086	6251.08	4	545.464	1707.7	1	428.419	5940.34	4	427.532	5708.73	4	447.754	5589.72	4	536.997	1590.26	1	378.08	5510.08	4	394.847	5750.6	4	404.427	5602.22	4	537.996	1632.75	1	381.125	5711.86	4	390.445	6071.63	4	397.539	6212.1	4	372.893	5687.79	4	385.434	5726.65
398.291	5813.26	4	393.691	5808.47	4	404.095	5790.67	4	545.469	1658.74	1	428.462	5585.28	4	427.565	5367.95	4	447.764	5864.79	4	536.999	1622.08	1	378.092	5741.41	4	394.853	5775.2	4	404.456	5716.06	4	538.003	1645.88	1	381.145	5570.96	4	390.459	5878.11	4	397.565	5920.69	4	372.898	5811.71	4	385.46	5853.87
398.304	5661.79	4	393.729	6033.34	4	404.111	5842.56	4	545.483	1557.73	1	428.546	5804.8	4	427.66	5887.33	4	447.765	5899.41	4	537.005	1628.52	1	378.104	6042.19	4	394.877	5750.44	4	404.457	5682.67	4	538.009	1561.77	1	381.187	5585.98	4	390.481	5757.12	4	397.609	5677.74	4	372.921	5801.09	4	385.464	5612.99
398.309	5701.69	4	393.814	5705.98	4	404.113	6070.93	4	545.492	1593.5	1	428.653	5651.5	4	427.697	5634.99	4	447.801	5999.11	4	537.025	1580.94	1	378.113	5763.41	4	394.881	6096.35	4	404.532	5879.29	4	538.01	1586.53	1	381.21	5842.33	4	390.488	5771.59	4	397.645	5888.65	4	372.942	5971.82	4	385.465	5886.9
398.341	5752.31	4	393.838	5849.94	4	404.116	5707.59	4	545.506	1626.89	1	428.674	5691.31	4	427.721	5582.84	4	447.804	5722.34	4	537.057	1625.04	1	378.115	5925.89	4	394.906	5796.41	4	404.535	6221.66	4	538.034	1710.62	1	381.271	5787.27	4	390.517	5583.6	4	397.682	6127.15	4	372.942	5804.03	4	385.468	5899.55
398.432	5641.87	4	393.858	5668.8	4	404.134	6020.51	4	545.511	1609.57	1	428.767	5822.38	4	427.767	5621.72	4	447.82	5860.68	4	537.08	1680.68	1	378.13	5627.31	4	394.919	6025.95	4	404.581	5771.08	4	538.037	1668.85	1	381.322	5747.38	4	390.517	5603.16	4	397.694	5948.84	4	373.008	5883.24	4	385.481	5836.95
398.475	5759.47	4	393.868	6115.97	4	404.139	5869.09	4	545.52	1726.39	1	428.789	5593.57	4	427.812	5703.16	4	447.841	5717.29	4	537.085	1758.65	1	378.14	5801.29	4	394.923	5706.83	4	404.626	5845.16	4	538.058	1582.3	1	381.327	5869.6	4	390.548	5592.68	4	397.732	5739.71	4	373.009	5686.27	4	385.503	5643.42
398.476	5607.86	4	393.873	6110.66	4	404.178	5603.54	4	545.53	1627.41	1	428.8	5643.25	4	427.824	5797.12	4	447.871	5714.73	4	537.088	1615.5	1	378.192	5893.93	4	394.983	5831.4	4	404.636	5690.67	4	538.07	1616.4	1	381.328	5979.18	4	390.554	5783.24	4	397.767	5934.64	4	373.028	5782.66	4	385.503	5769.7
398.48	5729.5	4	393.962	5915.19	4	404.183	5667.25	4	545.536	1595.99	1	428.818	5965.24	4	427.843	6024.59	4	447.937	5978.13	4	537.091	1563.73	1	378.2	5699.21	4	394.991	5750.95	4	404.637	5512.3	4	538.078	1588.44	1	381.346	6059.64	4	390.575	5627.47	4	397.768	5619.52	4	373.03	5763.21	4	385.507	5883.78
398.591	6216.11	4	393.987	5759.15	4	404.194	5953.41	4	545.544	1627.72	1	428.888	5564.38	4	427.885	5911.59	4	447.95	6028.46	4	537.099	1723.65	1	378.231	5696.32	4	395.002	5577.67	4	404.651	5903.43	4	538.103	1673.58	1	381.374	6283.78	4	390.577	5726.57	4	397.77	6339.9	4	373.038	5636.99	4	385.512	5803.27
398.608	5767.39	4	394.016	5825.73	4	404.225	5690.21	4	545.551	1682.41	1	428.899	5708.46	4	427.891	5726.83	4	447.957	5945.29	4	537.108	1623.4	1	378.234	5677.15	4	395.012	5572.28	4	404.756	5894.24	4	538.106	1543.53	1	381.391	6072.49	4	390.61	5857.14	4	397.795	5984.92	4	373.063	5730.89	4	385.518	5737.57
398.658	5577.02	4	394.094	5783.72	4	404.269	6089.64	4	545.554	1643.97	1	428.964	5392.06	4	428	6194.74	4	447.962	5621.74	4	537.128	1688.97	1	378.237	6222.57	4	395.021	5549.51	4	404.811	5746.91	4	538.166	1606.49	1	381.396	5887.53	4	390.617	5615.15	4	397.856	5876.59	4	373.13	5679.86	4	385.547	5548.17
398.668	5847.85	4	394.115	6155.48	4	404.29	6112.04	4	545.564	1717.81	1	429.146	5756.24	4	428.016	5573.27	4	447.97	5754.95	4	537.152	1793.9	1	378.268	5909.97	4	395.05	5788.35	4	404.818	5764.91	4	538.188	1579.1	1	381.407	5663.04	4	390.654	5967.79	4	397.863	5845.86	4	373.13	5919.52	4	385.548	5612.22
398.679	5827.31	4	394.166	5613.37	4	404.3	5787.18	4	545.594	1761.84	1	429.204	5956.19	4	428.034	5641.8	4	447.998	5566.29	4	537.168	1661.07	1	378.3	5945.86	4	395.072	5865.9	4	404.829	5942.17	4	538.193	1625.21	1	381.408	5767.64	4	390.674	5751.97	4	397.953	5773.47	4	373.185	5706.16	4	385.589	6302.53
398.68	5605.7	4	394.214	5746.07	4	404.341	5897.73	4	545.596	1619.83	1	429.21	6103.96	4	428.042	5710.33	4	448.058	5557.88	4	537.17	1682.77	1	378.32	5860.03	4	395.1	6121.27	4	404.844	5691.48	4	538.206	1684.35	1	381.431	5624.49	4	390.687	5648.73	4	398	6039.49	4	373.226	6139.98	4	385.597	5874.67
398.741	5797.18	4	394.243	5723.91	4	404.378	6262.65	4	545.596	1791.45	1	429.305	5668.61	4	428.045	5437.78	4	448.081	5584.14	4	537.185	1569.37	1	378.323	5521.01	4	395.103	6142.93	4	404.863	5733.65	4	538.217	1675.36	1	381.533	5508.68	4	390.696	5968.74	4	398.024	5785.64	4	373.227	5777.42	4	385.607	5768.15
398.826	5934.05	4	394.245	5842.43	4	404.405	5550.29	4	545.608	1567.86	1	429.306	5586.36	4	428.115	5534.45	4	448.095	5595.98	4	537.253	1804.53	1	378.344	6006.49	4	395.105	5711.43	4	404.885	5646.53	4	538.222	1628.12	1	381.537	5898.72	4	390.757	5663.12	4	398.024	5856.63	4	373.255	5621.1	4	385.608	5481.51
398.857	5738.35	4	394.298	5697.58	4	404.425	5733.92	4	545.63	1592.3	1	429.352	5645.84	4	428.139	6054.01	4	448.137	5905.37	4	537.253	1704.06	1	378.36	5880.94	4	395.125	5955.98	4	404.89	5519.81	4	538.254	1599.86	1	381.567	5895.38	4	390.806	6047.49	4	398.025	5792.05	4	373.256	6232.94	4	385.614	5752.46
398.866	5653.07	4	394.401	5836.92	4	404.46	6156.62	4	545.65	1725.83	1	429.384	6319.68	4	428.168	5711.84	4	448.349	5771.8	4	537.26	1707.43	1	378.391	5778.08	4	395.147	5924.39	4	405.004	5887.38	4	538.284	1677.86	1	381.576	5893.73	4	390.837	5680.92	4	398.035	5687.13	4	373.263	5838.94	4	385.689	5679.47
398.927	5651.17	4	394.471	5708.32	4	404.472	5774.7	4	545.705	1547.06	1	429.437	5679.89	4	428.274	5603.23	4	448.359	5698.16	4	537.277	1536.04	1	378.462	5730.41	4	395.171	5495.63	4	405.016	6109.51	4	538.286	1628.22	1	381.628	5830.99	4	390.874	5702.53	4	398.041	6034.07	4	373.285	5600.34	4	385.728	6039.41
398.94	5583.48	4	394.556	5536.83	4	404.51	5584.97	4	545.731	1699.35	1	429.655	5803.23	4	428.297	5390.61	4	448.393	5630.15	4	537.294	1605.91	1	378.466	6013.23	4	395.175	5899.91	4	405.023	5774.18	4	538.288	1677.17	1	381.633	5719.16	4	390.884	5843.69	4	398.049	5947.06	4	373.293	5799.58	4	385.742	5623.64
398.943	5683.71	4	394.574	5568.29	4	404.579	6125.77	4	545.739	1615.54	1	430.047	5695.19	4	428.309	5616.78	4	448.397	5861.98	4	537.299	1630.29	1	378.493	6151.31	4	395.205	6147.71	4	405.031	5467.98	4	538.3	1754.3	1	381.64	5762.23	4	390.889	6129.16	4	398.07	5686.32	4	373.32	5613.25	4	385.757	5885.06
399.003	5646.5	4	394.589	5818.12	4	404.59	6048.03	4	545.748	1730.1	1	430.069	5722.68	4	428.32	5887.11	4	448.441	5731.44	4	537.318	1604.06	1	378.516	6185.97	4	395.211	5675.29	4	405.037	5806.66	4	538.303	1564.16	1	381.659	5454.36	4	390.902	5811.05	4	398.098	5856.35	4	373.37	5894.28	4	385.764	5734.31
399.004	5874.01	4	394.649	5592.04	4	404.595	5861.86	4	545.816	1625.15	1	430.202	5558.82	4	428.374	5568.02	4	448.495	5663.1	4	537.33	1665.24	1	378.517	5825.26	4	395.224	6102.46	4	405.06	5670.27	4	538.318	1602.51	1	381.717	5690.17	4	390.965	5895.2	4	398.104	5801.18	4	373.384	6407.75	4	385.819	5802.76
399.06	5781.06	4	394.727	5816.01	4	404.661	6090.58	4	545.824	1703.66	1	430.341	5392.37	4	428.386	5710.97	4	448.539	5706.75	4	537.353	1671.66	1	378.568	5756.87	4	395.253	5718.77	4	405.076	5892.57	4	538.346	1592.18	1	381.745	5699.59	4	390.968	5608.69	4	398.105	5939.81	4	373.388	6210.46	4	385.837	5687.19
399.116	5878.64	4	394.73	5624.94	4	404.662	5920.35	4	545.844	1665.87	1	430.396	5653.23	4	428.556	5746.41	4	448.549	5726.98	4	537.356	1770.51	1	378.576	5960.23	4	395.26	5631.93	4	405.079	5898.12	4	538.347	1536.96	1	381.79	5900.71	4	390.977	5758.94	4	398.124	5937.61	4	373.397	5551.73	4	385.853	5559.19
399.164	5689.27	4	394.783	6146.72	4	404.672	5963.83	4	545.85	1654.92	1	430.441	5719.42	4	428.598	5410.84	4	448.58	5828.1	4	537.362	1541.68	1	378.639	5958.46	4	395.266	5978.54	4	405.082	5562.72	4	538.349	1645.46	1	381.793	6137.59	4	390.991	5951.15	4	398.171	6168.06	4	373.401	5880.94	4	385.862	5835.58
399.172	5530.77	4	394.8	5638.64	4	404.685	6204.26	4	545.901	1775.03	1	430.499	5655.61	4	428.646	6012.57	4	448.709	5745.1	4	537.366	1667.41	1	378.656	5978.63	4	395.293	5712.7	4	405.084	6284.8	4	538.35	1652.17	1	381.801	5764.31	4	391.024	5834.99	4	398.174	5762.77	4	373.407	5548.28	4	385.937	5772.15
399.207	5699.72	4	394.807	6042.12	4	404.697	6189.32	4	545.902	1625.33	1	430.602	5993.67	4	428.687	6256.73	4	448.736	5972.25	4	537.376	1622.76	1	378.696	6263.32	4	395.295	5980.94	4	405.115	5591.87	4	538.364	1640.41	1	381.815	6240.26	4	391.04	5980.2	4	398.193	5421.3	4	373.42	6110.14	4	385.978	5346.77
399.212	5900.98	4	394.841	5689.21	4	404.801	5573.16	4	545.933	1670.97	1	430.639	5695.32	4	428.71	5278.41	4	448.796	5953.52	4	537.386	1674.73	1	378.704	5893.36	4	395.303	5749.64	4	405.134	5711.1	4	538.384	1694.52	1	381.843	6131.66	4	391.042	5581.58	4	398.246	5736.88	4	373.427	5763.77	4	386	6028.6
399.286	5646.09	4	394.846	5818.66	4	404.82	5929.91	4	545.96	1776.57	1	430.783	5659.52	4	428.733	5717.25	4	448.805	5652.7	4	537.386	1602.52	1	378.718	5696.74	4	395.322	5809.41	4	405.146	5614.74	4	538.395	1708.06	1	381.867	5986.87	4	391.078	5843.75	4	398.253	5469.46	4	373.479	5976.06	4	386.008	5666.16
399.349	5976.67	4	394.847	6223.19	4	404.883	5760.97	4	545.972	1660.02	1	430.839	6093.14	4	428.821	5781.15	4	448.875	5747.54	4	537.406	1606.42	1	378.719	6032.07	4	395.342	5765.97	4	405.167	5690.49	4	538.402	1607.91	1	381.89	5690.35	4	391.1	5764.04	4	398.282	6118.53	4	373.479	5558.02	4	386.015	5586.81
399.415	5847.22	4	394.861	6081.66	4	404.893	5236.41	4	545.972	1605.34	1	431.003	5706.74	4	428.834	5626.27	4	449.016	5861.19	4	537.406	1637.04	1	378.723	5832.4	4	395.388	5867.03	4	405.17	5986.34	4	538.426	1657.24	1	381.968	5884.53	4	391.107	6089.81	4	398.312	5673.4	4	373.496	5500.44	4	386.015	5754.77
399.446	6112.29	4	394.872	5862.36	4	404.905	5606.7	4	545.979	1548.41	1	431.023	5611.43	4	428.846	6163.28	4	449.058	5667.89	4	537.422	1654.45	1	378.729	5984.88	4	395.411	5578.43	4	405.189	5679.55	4	538.432	1666.81	1	382.001	5892.61	4	391.138	5655.71	4	398.353	6067.81	4	373.53	5567.85	4	386.028	5444.98
399.518	5785.2	4	394.922	5679.67	4	404.909	5819.85	4	545.98	1487.77	1	431.09	5563.82	4	428.874	6040.76	4	449.126	6022.84	4	537.423	1622.92	1	378.78	6140	4	395.411	5639.98	4	405.21	5931.02	4	538.432	1668.74	1	382.001	5671.48	4	391.139	5688.16	4	398.385	5776.52	4	373.535	5845.66	4	386.05	5782.3
399.519	6348.45	4	394.967	5497.25	4	404.93	5831.84	4	545.987	1846.12	1	431.151	5410.65	4	428.906	5547.5	4	449.14	5714.58	4	537.439	1658.82	1	378.794	5796.88	4	395.432	5758.15	4	405.241	5880.6	4	538.456	1693.65	1	382.004	5927.78	4	391.143	5590.2	4	398.408	6282.79	4	373.568	5983.52	4	386.108	5672.38
399.539	5917.14	4	394.988	5826.16	4	404.979	5544.63	4	545.99	1658.74	1	431.253	5790.54	4	428.997	5661.07	4	449.149	5729.98	4	537.472	1632.03	1	378.806	5633.33	4	395.455	5989.81	4	405.271	5870.44	4	538.473	1689.73	1	382.031	5987.92	4	391.165	5937.28	4	398.464	5877.17	4	373.58	5770.83	4	386.137	6065.56
399.553	6014.17	4	395.008	5762.23	4	405.013	5630.39	4	546.013	1509.43	1	431.351	5837.54	4	428.999	5490.72	4	449.317	5399.41	4	537.474	1602.01	1	378.822	5529.69	4	395.51	5721.61	4	405.314	5785.96	4	538.494	1664.35	1	382.057	5964.61	4	391.175	5554.29	4	398.5	5633.09	4	373.595	5712.28	4	386.184	5685.28
399.587	5823.66	4	395.041	5591.11	4	405.077	5761.56	4	546.079	1561.12	1	431.383	6050.66	4	429.005	5451.32	4	449.371	5882.88	4	537.493	1586.37	1	378.844	6165.95	4	395.533	5991.43	4	405.328	5663.04	4	538.5	1742.8	1	382.066	5795.43	4	391.236	6257.91	4	398.514	5679.85	4	373.629	5593.06	4	386.239	6157.95
399.589	5552.56	4	395.118	5744.05	4	405.08	5845.15	4	546.086	1620.27	1	431.477	6018.35	4	429.015	5785.53	4	449.403	5832.88	4	537.498	1627.79	1	378.857	5720.46	4	395.546	5659.61	4	405.33	5644.37	4	538.531	1591.76	1	382.068	5980.97	4	391.262	6071.57	4	398.522	5995.11	4	373.773	5859.79	4	386.277	5474.51
399.594	5614.26	4	395.162	5789.99	4	405.111	6061.58	4	546.105	1617.77	1	431.607	5615.86	4	429.028	5764.39	4	449.459	5660.88	4	537.5	1668.4	1	378.858	5757.94	4	395.567	5645.29	4	405.368	5651.25	4	538.535	1502.32	1	382.152	5879.86	4	391.309	5715.81	4	398.533	5784.01	4	373.795	5842.7	4	386.33	5653.86
399.601	5696.81	4	395.164	5724.26	4	405.118	5835.22	4	546.12	1551.6	1	431.656	5865.72	4	429.068	5546.41	4	449.488	5461.93	4	537.521	1644.67	1	378.858	5718.47	4	395.569	5572.1	4	405.379	5766.4	4	538.554	1627.64	1	382.21	5755.41	4	391.312	5589.02	4	398.539	5858.95	4	373.893	5806.47	4	386.336	5482.45
399.61	5573.92	4	395.183	5414.61	4	405.132	6447.52	4	546.122	1748.97	1	431.689	5642.52	4	429.082	5650.97	4	449.503	5749.92	4	537.533	1669.5	1	378.869	5657.13	4	395.574	5421.58	4	405.38	6306.82	4	538.562	1530.4	1	382.262	5743.01	4	391.317	6331.11	4	398.546	6042.51	4	373.92	5688.38	4	386.343	5732.54
399.62	5623.34	4	395.216	5502.74	4	405.151	5834.73	4	546.147	1616.69	1	431.782	5628.33	4	429.122	5726.78	4	449.59	5612.43	4	537.54	1619.87	1	378.9	5942.28	4	395.575	6072.63	4	405.397	5632.48	4	538.606	1608.47	1	382.268	5785.93	4	391.325	5654.01	4	398.568	5801.57	4	373.956	6193.76	4	386.358	5736.69
399.636	5690.2	4	395.253	6152.99	4	405.153	6152.52	4	546.151	1626.09	1	431.862	5563.61	4	429.132	5721.45	4	449.595	5686.43	4	537.549	1638.05	1	378.904	6186.6	4	395.624	5793.58	4	405.423	5683.09	4	538.615	1617.68	1	382.283	5939.09	4	391.329	5729.77	4	398.575	5632.47	4	373.959	5795.78	4	386.367	5850.24
399.726	5327.09	4	395.293	6041.78	4	405.162	5894.97	4	546.152	1639.33	1	431.868	5743.68	4	429.215	5703.88	4	449.612	5719.3	4	537.554	1741.1	1	378.915	5692.28	4	395.628	6013.4	4	405.441	5927.82	4	538.647	1579.26	1	382.293	6066.16	4	391.36	5795.39	4	398.576	6035.83	4	373.965	5779.52	4	386.371	6026.95
399.729	5661.12	4	395.313	5689.12	4	405.279	5728.42	4	546.178	1696.42	1	432.2	5812.14	4	429.3	5575.08	4	449.618	5498.11	4	537.571	1715.96	1	378.924	5587.89	4	395.634	6191.18	4	405.459	5934.34	4	538.661	1679.44	1	382.295	5811.47	4	391.363	5649.84	4	398.582	5711.1	4	374.032	5783.73	4	386.372	5533.46
399.827	5779.31	4	395.387	5695.69	4	405.294	5677.33	4	546.21	1744.66	1	432.2	5990.17	4	429.316	5678.79	4	449.654	5963.98	4	537.578	1690.93	1	378.968	5858.43	4	395.651	5637.6	4	405.462	5953.53	4	538.686	1726.54	1	382.348	5911.8	4	391.377	5635.76	4	398.618	5752.88	4	374.037	5845.78	4	386.41	5702.27
399.897	5573.17	4	395.451	5687.26	4	405.295	5869.59	4	546.223	1622.87	1	432.292	5709.97	4	429.368	5503.81	4	449.662	5704.41	4	537.601	1620.55	1	379.015	6148.48	4	395.664	5941.2	4	405.54	5744.32	4	538.696	1521.95	1	382.392	5609.37	4	391.386	6152.42	4	398.626	5799.23	4	374.086	6034.71	4	386.412	5460.66
399.944	5871.65	4	395.462	5558.43	4	405.323	6272.65	4	546.228	1569.57	1	432.304	5926.1	4	429.393	5825.6	4	449.692	5646.43	4	537.627	1544.74	1	379.03	5685.53	4	395.672	5927.07	4	405.547	6252.51	4	538.696	1638.04	1	382.395	6162.71	4	391.401	5563.63	4	398.637	6197.18	4	374.089	5831.72	4	386.416	5571.95
399.972	6296.58	4	395.483	5806.59	4	405.37	5695.28	4	546.232	1602.87	1	432.341	5682.65	4	429.485	5543.49	4	449.782	5773.48	4	537.628	1681.8	1	379.034	5786.7	4	395.746	5807.18	4	405.554	5791.4	4	538.742	1724.23	1	382.424	5661.9	4	391.436	5711.23	4	398.657	5696.84	4	374.099	5659.8	4	386.419	5762.38
400.04	5732.41	4	395.557	5529.8	4	405.376	5498.05	4	546.299	1656.49	1	432.387	5728.45	4	429.49	5943.72	4	449.851	5675.76	4	537.63	1569.17	1	379.041	5828.55	4	395.747	5837.96	4	405.555	6248.88	4	538.747	1641.87	1	382.426	6368.3	4	391.437	5517.21	4	398.669	5874.19	4	374.11	5515.56	4	386.441	5859.99
400.053	5691.91	4	395.599	5831.16	4	405.377	5616.76	4	546.326	1469.2	1	432.45	5664.36	4	429.544	6191.87	4	450.029	5698.55	4	537.645	1601.35	1	379.078	5964.24	4	395.751	5726.25	4	405.565	6004.06	4	538.754	1700.64	1	382.466	5960.55	4	391.447	5662.45	4	398.679	5917.73	4	374.121	5694.37	4	386.464	5908.54
400.071	5733.51	4	395.62	6207.6	4	405.387	6137.95	4	546.342	1635.45	1	432.496	6000.45	4	429.56	5838.96	4	450.161	6030.35	4	537.654	1581.47	1	379.096	5712.39	4	395.759	5657.57	4	405.585	5572.33	4	538.766	1678.37	1	382.538	5702.35	4	391.447	5905.04	4	398.717	5540.87	4	374.131	6067.12	4	386.473	5427.11
400.148	5741.69	4	395.629	6037.76	4	405.4	5859.82	4	546.361	1746.52	1	432.506	5947.21	4	429.582	5917.92	4	450.179	6020.86	4	537.67	1729.27	1	379.103	6334.63	4	395.778	5958.56	4	405.646	5812.02	4	538.774	1688.81	1	382.54	5838.48	4	391.524	5816.76	4	398.735	6165.64	4	374.159	5721.96	4	386.473	5566.93
400.151	5783.27	4	395.695	5770.52	4	405.442	5891.97	4	546.376	1710.84	1	432.516	5691.3	4	429.604	5698	4	450.256	5797.1	4	537.676	1644.98	1	379.121	5846.42	4	395.801	5649.34	4	405.651	5735.19	4	538.78	1696.21	1	382.559	5891.1	4	391.53	5892.07	4	398.752	5815.23	4	374.159	5730.69	4	386.49	5539.39
400.167	5855.79	4	395.711	5771.67	4	405.457	5682.07	4	546.383	1731.43	1	432.572	5790.78	4	429.606	5616.87	4	450.261	6037.58	4	537.68	1750.47	1	379.185	6443.83	4	395.831	5684.42	4	405.71	5798.8	4	538.784	1744.13	1	382.562	5745.16	4	391.546	5901.82	4	398.794	6007.22	4	374.237	5975.25	4	386.496	5752.35
400.174	6001.21	4	395.737	5742.27	4	405.459	5968.44	4	546.387	1694.79	1	432.584	5790.25	4	429.763	5964.74	4	450.287	5816.17	4	537.699	1602.86	1	379.193	5946.2	4	395.859	5744.27	4	405.713	5816.41	4	538.795	1711.46	1	382.571	6186.7	4	391.554	5695.89	4	398.868	5687.49	4	374.283	5726.5	4	386.515	5702.41
400.245	5533.13	4	395.805	5521.54	4	405.533	5964.15	4	546.387	1436.33	1	432.643	5636.24	4	429.812	6250.71	4	450.39	5510.8	4	537.707	1818.84	1	379.239	5872.92	4	395.859	5616.48	4	405.745	5761.28	4	538.818	1729.03	1	382.611	5999.25	4	391.573	5740.92	4	398.886	6101.97	4	374.292	5734.2	4	386.52	5523.51
400.372	5712.73	4	395.811	5756.53	4	405.552	6155.84	4	546.415	1673.09	1	432.741	6012.61	4	429.815	5735.69	4	450.401	5606.59	4	537.725	1780.8	1	379.255	6134.77	4	395.871	5828.85	4	405.752	5898.94	4	538.822	1575.06	1	382.638	5638.92	4	391.574	5913.74	4	398.895	5591.78	4	374.298	5784.58	4	386.531	5941.03
400.408	5687.66	4	395.813	5698.31	4	405.555	5455.69	4	546.43	1635.68	1	432.785	5660.12	4	429.896	5855.45	4	450.405	5602.89	4	537.734	1654.63	1	379.279	5627.21	4	395.876	6210.6	4	405.76	5977.74	4	538.885	1744.18	1	382.667	5748.3	4	391.627	5602.75	4	398.907	6014.23	4	374.337	5933.34	4	386.556	5557.09
400.43	5959.56	4	395.823	5800.41	4	405.602	5535.77	4	546.468	1661.17	1	432.81	5655.65	4	429.967	5672.28	4	450.414	5515.86	4	537.739	1679.93	1	379.326	5992.63	4	395.9	6152.34	4	405.761	6115.93	4	538.894	1587.57	1	382.705	5617.36	4	391.639	5665.12	4	398.922	6228.18	4	374.349	5698.73	4	386.584	5591.74
400.432	6052.04	4	395.837	5520.54	4	405.645	5745.64	4	546.477	1673.54	1	432.84	5695.44	4	429.97	5630.86	4	450.539	5826.74	4	537.741	1692.87	1	379.41	5717.51	4	395.909	5766.87	4	405.811	5835.1	4	538.901	1681.1	1	382.719	5834.81	4	391.657	5730.26	4	398.936	5789.15	4	374.382	6050.64	4	386.586	5823.08
400.438	5772.37	4	395.851	5659.85	4	405.659	6234.26	4	546.478	1707.09	1	432.846	5773.41	4	430.06	5290.82	4	450.551	5589.67	4	537.755	1615.72	1	379.425	5596.5	4	395.933	5676.41	4	405.825	5568.61	4	538.916	1565.38	1	382.763	5631.76	4	391.678	5554.1	4	398.939	5570.96	4	374.401	5701.99	4	386.611	6113.82
400.471	5672.25	4	395.851	5472.84	4	405.7	5527.58	4	546.499	1663.46	1	432.93	5840.6	4	430.109	5747.11	4	450.6	5542.11	4	537.789	1622.25	1	379.431	5720.45	4	395.942	5618.61	4	405.826	5849.75	4	538.948	1588.75	1	382.771	5884.55	4	391.698	5647.5	4	398.946	5642.04	4	374.407	5683.88	4	386.679	5957.47
400.521	5659.36	4	395.869	5781.64	4	405.723	6079.5	4	546.509	1604.53	1	432.943	5693.93	4	430.121	5588.95	4	450.643	5426.38	4	537.792	1636.68	1	379.436	5879.69	4	395.957	5838.34	4	405.847	5788.7	4	539.025	1544.56	1	382.804	5783.53	4	391.766	5888.64	4	398.958	5595.37	4	374.427	5923.13	4	386.694	5478.45
400.527	5755.12	4	395.869	5841.01	4	405.734	5765.1	4	546.521	1667.26	1	433.008	5669.19	4	430.122	5779.34	4	450.674	5470.23	4	537.847	1689.19	1	379.447	5744.25	4	395.969	5752.22	4	405.881	5832.17	4	539.035	1713.42	1	382.816	5893.33	4	391.771	5733.31	4	398.96	6186.67	4	374.437	5996.69	4	386.728	5803.69
400.684	6168.48	4	395.909	5617.92	4	405.744	5972.83	4	546.534	1679.74	1	433.013	5823.74	4	430.129	5520.38	4	450.682	5792.17	4	537.868	1540.98	1	379.451	5753.97	4	395.97	5764.45	4	405.886	5653.85	4	539.05	1658.74	1	382.863	6058.56	4	391.797	5834.39	4	398.977	6268.69	4	374.442	5890.78	4	386.754	5593.9
400.725	5658.96	4	395.946	5681.75	4	405.755	5506.82	4	546.54	1556.36	1	433.076	5525.45	4	430.186	5568.99	4	450.696	5288.53	4	537.91	1593.68	1	379.503	5695.48	4	395.98	5918.03	4	405.886	5926.51	4	539.057	1678.61	1	382.865	5730.84	4	391.803	5701.81	4	398.978	5798.92	4	374.481	5752.68	4	386.76	5977.4
400.757	5604.62	4	395.958	5771.67	4	405.772	6231.71	4	546.582	1793.32	1	433.082	5791.81	4	430.216	5567.56	4	450.764	5484.88	4	537.91	1633.32	1	379.529	5674.72	4	395.989	5597.86	4	405.91	5818.11	4	539.147	1679.3	1	382.869	5924.61	4	391.832	5570.8	4	399.006	5750.16	4	374.547	5861.9	4	386.789	5588.58
400.788	5747.75	4	395.964	5679.89	4	405.846	5778.68	4	546.583	1610.48	1	433.084	5908.62	4	430.245	6157.87	4	450.89	5797.57	4	537.932	1677.82	1	379.577	5885.2	4	396.001	6177.57	4	405.913	5751.22	4	539.152	1602.93	1	382.884	6207.1	4	391.899	5607.12	4	399.014	5935.94	4	374.566	5594.76	4	386.803	5934.35
400.821	5525.33	4	395.968	5693.4	4	405.846	5832.43	4	546.598	1818.93	1	433.217	6035.7	4	430.246	6024.41	4	450.9	6155.32	4	537.946	1660.2	1	379.584	5588.64	4	396.005	5885.63	4	405.931	6154.01	4	539.159	1807.28	1	382.918	5923.35	4	391.914	5738.22	4	399.055	6124.17	4	374.622	5651.53	4	386.828	5788.43
400.839	6192.5	4	395.969	5586.13	4	405.85	5604.04	4	546.605	1711.16	1	433.39	5559	4	430.322	5667	4	450.953	5706.41	4	537.951	1704.57	1	379.604	6156.64	4	396.032	5607.1	4	405.953	5403.57	4	539.161	1543.28	1	382.93	6329.25	4	391.927	5740.96	4	399.058	5803.45	4	374.653	5933.08	4	386.844	5625.46
400.849	5655.67	4	396.022	6187.46	4	405.858	5758.29	4	546.657	1629.44	1	433.399	5688.13	4	430.384	5559.85	4	450.984	5628.92	4	538.034	1530.58	1	379.619	5897.89	4	396.07	5938.09	4	406.015	5913.24	4	539.162	1643.07	1	382.932	6283.72	4	391.929	6222.46	4	399.086	5750.05	4	374.682	6271.52	4	386.849	5875.49
400.876	6002.27	4	396.035	5593.9	4	405.9	5728.67	4	546.694	1736.77	1	433.425	5647.59	4	430.44	5844.14	4	451.009	5555.47	4	538.057	1550.45	1	379.622	5877.92	4	396.074	6108.4	4	406.028	5543.34	4	539.173	1597.53	1	382.935	5522.69	4	391.963	5776.72	4	399.103	5799.83	4	374.685	5712.75	4	386.852	5799.42
400.891	5821.75	4	396.058	5802.75	4	405.911	5739.16	4	546.694	1668.29	1	433.462	5738.61	4	430.44	5859	4	451.027	5835.61	4	538.095	1564.65	1	379.639	5702.29	4	396.077	6142.74	4	406.062	6006.27	4	539.184	1590.15	1	382.939	6021.2	4	391.965	6138.93	4	399.111	5856.86	4	374.716	5517.03	4	386.872	5674.86
400.896	5632.78	4	396.101	5732.07	4	405.947	5843.26	4	546.711	1746.91	1	433.515	5555.36	4	430.458	5413.48	4	451.09	5725.33	4	538.111	1572.13	1	379.646	5685.77	4	396.113	5843.75	4	406.067	5849.46	4	539.199	1608.73	1	383.002	5721.94	4	391.972	5978.77	4	399.124	5969.64	4	374.721	5655.93	4	386.918	5658.8
401.069	5755.23	4	396.139	5741.71	4	405.948	5757.5	4	546.744	1667.54	1	433.541	5729.26	4	430.481	5804.38	4	451.108	5662.76	4	538.118	1623.58	1	379.674	5857.97	4	396.133	5588.43	4	406.076	5659.35	4	539.202	1561.67	1	383.007	5886.16	4	391.977	5809.98	4	399.127	5752.18	4	374.785	5920.62	4	386.918	5498.24
401.141	5791.86	4	396.14	6169.6	4	405.961	5600.3	4	546.761	1592.3	1	433.599	5771.82	4	430.518	5675.53	4	451.334	5643.43	4	538.122	1578.6	1	379.693	5634.12	4	396.148	5820.88	4	406.159	5556.82	4	539.202	1644.89	1	383.059	6040.46	4	392.028	6054.03	4	399.151	5561.57	4	374.804	5826.18	4	386.932	5928.78
401.141	5666.36	4	396.145	5720.89	4	405.963	5747.41	4	546.769	1551.17	1	433.665	5742.91	4	430.577	5685.15	4	451.367	5838.27	4	538.181	1697.81	1	379.752	5778.13	4	396.149	6379.16	4	406.163	5676.66	4	539.209	1668.68	1	383.069	5982.52	4	392.031	5635.28	4	399.183	6081.68	4	374.814	5931.82	4	386.934	5754.81
401.193	5838.66	4	396.146	5871.12	4	406.05	5708.79	4	546.773	1698.9	1	433.684	5544.8	4	430.592	5586.82	4	451.394	5815.1	4	538.191	1550.24	1	379.777	5868.54	4	396.183	5753.41	4	406.18	5719.16	4	539.221	1803.24	1	383.107	6070.38	4	392.033	5950.4	4	399.196	5607	4	374.84	5834.58	4	386.962	5858.28
401.216	5748.81	4	396.152	5957.13	4	406.086	5713.81	4	546.788	1694.72	1	433.722	5632.69	4	430.617	6024.73	4	451.411	5655.56	4	538.204	1633.49	1	379.827	5656.5	4	396.187	6036.03	4	406.206	5708.57	4	539.244	1646.14	1	383.134	5831.13	4	392.071	5653.41	4	399.211	6079.61	4	374.884	5637.33	4	386.972	5926.71
401.219	5990.77	4	396.153	5919.97	4	406.097	5732.81	4	546.802	1740.67	1	433.813	5504.93	4	430.835	5568.41	4	451.426	5634.42	4	538.242	1640.18	1	379.856	5822.21	4	396.209	5941.25	4	406.213	5913.61	4	539.247	1580.42	1	383.172	5850.22	4	392.084	5662.09	4	399.214	5589.69	4	374.92	5672.59	4	387.019	5836.86
401.238	5462.76	4	396.157	5595.67	4	406.127	5888.61	4	546.803	1581.81	1	433.931	5689.62	4	430.875	5633.11	4	451.433	5752.76	4	538.27	1566.7	1	379.892	6006.04	4	396.239	5474.18	4	406.22	5772.97	4	539.255	1615.61	1	383.175	6189.89	4	392.108	5632.5	4	399.256	5620.32	4	374.929	6084.64	4	387.046	5488.7
401.479	5686.11	4	396.194	5567.26	4	406.14	5832.54	4	546.826	1585.95	1	434.126	5809.29	4	430.935	6163.66	4	451.436	5882.96	4	538.293	1576.28	1	379.944	5905.04	4	396.242	5894.55	4	406.225	6130.19	4	539.263	1618.32	1	383.179	5781.2	4	392.163	5759.79	4	399.274	5842.51	4	374.987	5887.28	4	387.064	5769.09
401.491	5773.34	4	396.195	5950.67	4	406.161	5613.92	4	546.838	1833.09	1	434.208	5724.8	4	430.989	5608.16	4	451.448	5639.55	4	538.303	1538.5	1	380.045	5950.62	4	396.257	5633.76	4	406.317	6169.05	4	539.277	1680.57	1	383.232	5892.64	4	392.167	5728.83	4	399.283	5878.02	4	374.989	5700.56	4	387.065	5533.84
401.491	5849.21	4	396.198	5978.76	4	406.17	5618.02	4	546.859	1487.4	1	434.214	5890.91	4	431.134	5735.35	4	451.454	5723.12	4	538.306	1717.36	1	380.052	5921.13	4	396.281	5653.45	4	406.342	6081.95	4	539.28	1666.28	1	383.251	5963.15	4	392.175	5907.66	4	399.296	5892.8	4	374.992	5991.73	4	387.109	5727.11
401.535	5465.7	4	396.205	6248.69	4	406.212	6067.92	4	546.863	1762.22	1	434.233	5618.46	4	431.134	5666.93	4	451.478	5600.36	4	538.319	1538.73	1	380.063	5889.9	4	396.287	5579.7	4	406.372	5442.91	4	539.29	1760.26	1	383.255	5802.3	4	392.18	5349.97	4	399.302	5625.11	4	375.016	6154.51	4	387.123	5712.49
401.551	5396.93	4	396.207	5968.83	4	406.242	6221.64	4	546.879	1650.62	1	434.335	5757.9	4	431.184	5618.5	4	451.51	5673.89	4	538.369	1717.02	1	380.08	5642.49	4	396.317	5762.62	4	406.4	5764.04	4	539.297	1567.32	1	383.257	5830.45	4	392.238	5601.98	4	399.324	6112.12	4	375.028	5584.61	4	387.123	5643.18
401.562	5743.83	4	396.226	5645.7	4	406.319	5718.53	4	546.919	1749.85	1	434.369	5529.76	4	431.218	5797.98	4	451.529	5749.65	4	538.378	1629.24	1	380.112	5622.72	4	396.338	5847.97	4	406.406	5751.54	4	539.322	1736.94	1	383.322	5757.58	4	392.273	5548.34	4	399.335	6006.51	4	375.031	6059.16	4	387.15	5817
401.586	5827.1	4	396.247	5532.86	4	406.326	5568.59	4	546.941	1613.56	1	434.37	5504.2	4	431.225	5597.22	4	451.535	5815.06	4	538.384	1661.84	1	380.138	6364.49	4	396.357	5687.7	4	406.426	5703.21	4	539.326	1705.35	1	383.332	5755.01	4	392.324	5765.88	4	399.337	5573.93	4	375.117	5597.52	4	387.228	5691.32
401.594	5821.38	4	396.306	5736.5	4	406.341	6057.35	4	546.952	1627.1	1	434.388	5820.29	4	431.304	5655.51	4	451.599	5763.32	4	538.408	1575.5	1	380.153	5736.13	4	396.375	5529.83	4	406.444	5833.34	4	539.331	1697.91	1	383.335	5793.72	4	392.365	6311.04	4	399.35	5573.88	4	375.137	5697.01	4	387.266	5503.47
401.638	5786.46	4	396.338	5698.98	4	406.35	5579.75	4	546.961	1666.25	1	434.446	6230.83	4	431.366	5601.94	4	451.732	5852.07	4	538.429	1644.09	1	380.18	5509.58	4	396.386	5865.48	4	406.468	5811.37	4	539.344	1609.81	1	383.342	5990.4	4	392.382	6213.75	4	399.364	5756.22	4	375.177	5681.38	4	387.276	5666.84
401.676	5851.56	4	396.346	5625.49	4	406.363	5933.18	4	546.979	1605.19	1	434.474	5659.69	4	431.381	5879.27	4	451.751	5926.47	4	538.465	1517.31	1	380.245	5857.83	4	396.387	5779.38	4	406.512	5869.87	4	539.351	1613.2	1	383.372	5864.48	4	392.436	5579.32	4	399.403	6131.85	4	375.192	5685.65	4	387.282	5638.46
401.699	5568.99	4	396.416	6317.74	4	406.405	6458.45	4	547	1662	1	434.488	5515.42	4	431.389	5929.8	4	451.771	5702.27	4	538.471	1584.79	1	380.248	5641.52	4	396.426	5740.93	4	406.526	5842.99	4	539.392	1673.29	1	383.377	5862.65	4	392.525	5647.31	4	399.405	5966.17	4	375.193	5801.22	4	387.307	6261.61
401.701	5688.71	4	396.472	5952.55	4	406.456	5641.43	4	547.005	1645.56	1	434.628	5633.74	4	431.42	5581.35	4	451.865	5658.3	4	538.494	1493.21	1	380.258	5762.2	4	396.429	5824.49	4	406.541	5771.64	4	539.395	1626.61	1	383.389	5708.75	4	392.55	5892.04	4	399.431	5706.33	4	375.22	5592.09	4	387.31	5820.03
401.718	5713.33	4	396.486	5672.95	4	406.466	5751.55	4	547.016	1579.86	1	434.709	5592.46	4	431.431	5702.81	4	451.896	4850.34	4	538.499	1624.63	1	380.262	5795.5	4	396.443	5972.19	4	406.571	5836.7	4	539.411	1776.28	1	383.414	6220.33	4	392.597	5531.92	4	399.441	5741.06	4	375.225	5683.75	4	387.316	5488.74
401.774	5605.31	4	396.487	5893.58	4	406.482	5765.3	4	547.037	1704.18	1	434.733	6053.26	4	431.529	6004.4	4	451.963	5543.55	4	538.516	1669.42	1	380.265	5623.61	4	396.486	5660.6	4	406.572	5649.01	4	539.417	1706.56	1	383.422	6122.59	4	392.611	5666.81	4	399.441	5743.25	4	375.227	6187.23	4	387.372	5784.54
401.782	5588.6	4	396.496	5742.92	4	406.482	5854.52	4	547.087	1669.65	1	434.834	5656.25	4	431.53	5849.66	4	451.979	5726.98	4	538.525	1644.88	1	380.273	5944.86	4	396.513	5640.56	4	406.626	5685.91	4	539.479	1621.98	1	383.448	5760.79	4	392.617	5836.59	4	399.515	5716.23	4	375.274	5900.13	4	387.394	5853.68
401.851	5658.95	4	396.502	5962.62	4	406.492	6262.15	4	547.103	1715.79	1	434.845	5599.87	4	431.588	5960.78	4	452.011	5956.84	4	538.572	1532.9	1	380.282	6446.89	4	396.522	6206.11	4	406.63	5774.61	4	539.511	1633.7	1	383.449	5787.31	4	392.618	5553.35	4	399.517	6308.39	4	375.315	5692.69	4	387.421	5457.97
401.873	5623.74	4	396.514	5769.45	4	406.527	5610.31	4	547.11	1768.4	1	434.857	5653.19	4	431.611	5630.06	4	452.073	5836.37	4	538.593	1666.47	1	380.29	5894.12	4	396.546	5639.93	4	406.634	5753.81	4	539.536	1542.15	1	383.467	5764.54	4	392.619	5546.58	4	399.521	5669.01	4	375.35	5996.26	4	387.443	5747.61
401.892	5940.42	4	396.514	5962.25	4	406.587	5548.45	4	547.116	1716.08	1	434.911	5694.81	4	431.62	6295.77	4	452.074	5971.98	4	538.632	1621.49	1	380.291	5889.11	4	396.562	5643.65	4	406.651	5921.76	4	539.582	1650.43	1	383.482	5705.89	4	392.649	5894	4	399.528	5945.46	4	375.373	5814.7	4	387.523	5303.42
401.945	5470.74	4	396.538	5717.59	4	406.61	6249.98	4	547.123	1711.69	1	434.913	5598.11	4	431.67	5595.46	4	452.116	5603.9	4	538.637	1662.65	1	380.315	5770.12	4	396.604	5785.79	4	406.663	5657.99	4	539.624	1569.8	1	383.51	5822.64	4	392.657	5826.66	4	399.554	5926.18	4	375.435	5889.88	4	387.525	5803.36
401.957	5766.94	4	396.538	5628.29	4	406.68	5782.58	4	547.127	1694.26	1	434.931	5947.61	4	431.731	5709.58	4	452.159	5558.93	4	538.638	1649.3	1	380.324	5746.78	4	396.624	6057.66	4	406.674	5604.15	4	539.635	1704.07	1	383.514	5878.47	4	392.718	6136.8	4	399.57	6163.91	4	375.442	5709.12	4	387.525	5609.48
401.993	5839.62	4	396.563	6147.48	4	406.683	5826.16	4	547.143	1635.51	1	434.956	6183.55	4	431.776	5776.23	4	452.231	6152.15	4	538.641	1726.82	1	380.346	5792.74	4	396.634	5999.37	4	406.735	5689.62	4	539.641	1533.19	1	383.517	5659.24	4	392.738	5851.76	4	399.65	5497.93	4	375.446	5650.9	4	387.534	5692.97
402.032	5715.47	4	396.571	5627.71	4	406.687	5696.81	4	547.155	1740.14	1	434.968	5929.85	4	431.837	6246.35	4	452.309	5929.69	4	538.65	1564.97	1	380.347	6009.76	4	396.634	5547.46	4	406.798	5695.6	4	539.662	1678.9	1	383.52	5873.47	4	392.739	5726.86	4	399.658	5891.65	4	375.473	5868.42	4	387.535	6269.14
402.119	6091.25	4	396.589	5557.01	4	406.742	5773.85	4	547.183	1559.88	1	434.996	5692.66	4	431.849	5730	4	452.344	5618.46	4	538.677	1580.96	1	380.36	5881.29	4	396.646	5976.03	4	406.817	5829.98	4	539.673	1665.86	1	383.526	5756.28	4	392.749	6068.17	4	399.689	5542.53	4	375.494	5603.15	4	387.572	5782.76
402.139	5792.26	4	396.637	6218	4	406.787	6114.84	4	547.21	1757.4	1	435.09	5629.26	4	431.85	5583.74	4	452.414	5704.15	4	538.696	1799.76	1	380.38	5841.42	4	396.684	5583.62	4	406.862	6161.81	4	539.677	1607.86	1	383.527	6062.84	4	392.758	5593.68	4	399.691	6007.81	4	375.501	5721.45	4	387.573	5616.36
402.148	5910.23	4	396.639	5869.03	4	406.811	5755.49	4	547.246	1517.77	1	435.102	5735.96	4	431.858	5794.86	4	452.503	5361	4	538.708	1556.85	1	380.385	5764.88	4	396.697	5779.21	4	406.882	5958	4	539.714	1587.93	1	383.535	5744.83	4	392.776	5795.06	4	399.698	6195.15	4	375.511	5990.9	4	387.585	5623.47
402.163	6192.95	4	396.654	6133.39	4	406.842	5777.48	4	547.249	1631.07	1	435.135	5506.59	4	431.866	5634.46	4	452.508	5690.05	4	538.714	1567.81	1	380.401	5715.29	4	396.703	5926.98	4	406.883	5780.67	4	539.719	1658.52	1	383.541	6012.67	4	392.787	5636.42	4	399.716	5726.91	4	375.532	5734.32	4	387.591	5737.61
402.221	6121.19	4	396.683	5629.3	4	406.86	5676.15	4	547.263	1560.98	1	435.141	5636.96	4	432.062	6360.79	4	452.562	5827.91	4	538.714	1546.42	1	380.415	5668.67	4	396.75	5680.76	4	406.924	5887.01	4	539.732	1717.39	1	383.549	5640.89	4	392.807	5635.94	4	399.727	5882.87	4	375.543	5921.4	4	387.605	5586.99
402.255	6065.46	4	396.712	5799.87	4	406.889	5883.8	4	547.286	1756.41	1	435.153	5823.05	4	432.078	5197.17	4	452.617	5595.07	4	538.733	1628.26	1	380.435	5856.63	4	396.76	5775.5	4	406.957	5783.62	4	539.734	1644.32	1	383.605	6129.49	4	392.824	5763.18	4	399.73	5800.01	4	375.56	5795.84	4	387.62	5669.77
402.311	5454.67	4	396.734	6045.6	4	406.909	5832.75	4	547.298	1641.27	1	435.179	5643.65	4	432.078	5645.65	4	452.619	5621.21	4	538.741	1580.48	1	380.56	5812.14	4	396.839	5598.58	4	406.967	5939.66	4	539.737	1601.43	1	383.659	5688.75	4	392.855	5650.74	4	399.765	5941.72	4	375.584	5577.02	4	387.687	5613.26
402.32	5653.8	4	396.742	5676.34	4	406.947	5649.69	4	547.324	1608.32	1	435.25	5567.04	4	432.127	5700.91	4	452.672	5661.15	4	538.745	1679.46	1	380.568	5476.95	4	396.886	5745.91	4	406.996	5858.58	4	539.751	1613.98	1	383.727	5768.79	4	392.883	5792.12	4	399.8	5845.39	4	375.597	5628.41	4	387.691	5531.11
402.32	5849.45	4	396.756	5755.97	4	406.948	5745.65	4	547.349	1508.85	1	435.313	5779.83	4	432.132	5584.42	4	452.707	5697.05	4	538.748	1739.97	1	380.568	5747.9	4	396.958	5915.29	4	407.019	6001.06	4	539.755	1612.47	1	383.744	6341.35	4	392.905	5933.08	4	399.891	6240.46	4	375.602	5721.07	4	387.691	5568.98
402.323	5585.35	4	396.834	5748.37	4	407.082	5664.38	4	547.35	1522.98	1	435.348	5640.95	4	432.146	5746.36	4	452.709	5644.3	4	538.749	1724.17	1	380.575	5615.63	4	396.978	6117.5	4	407.079	5642.38	4	539.757	1633.76	1	383.746	5757.52	4	392.909	6230.28	4	399.893	6138.5	4	375.61	5756.55	4	387.699	5772.78
402.349	5557.77	4	396.836	5657.62	4	407.127	5564.41	4	547.368	1600.08	1	435.375	5751.34	4	432.2	5633.41	4	452.738	5680.25	4	538.762	1535.25	1	380.584	5612.95	4	397.016	5960.52	4	407.102	5747.76	4	539.768	1637.53	1	383.779	5619.88	4	392.912	5618.44	4	399.897	5830.36	4	375.611	6149.22	4	387.736	5545.4
402.403	6049.02	4	396.836	5799.17	4	407.135	6209.83	4	547.37	1742.25	1	435.4	5791.95	4	432.298	5626.26	4	452.763	5434.55	4	538.767	1643.64	1	380.586	5867.84	4	397.038	5756	4	407.113	6228.91	4	539.78	1652.94	1	383.803	5852.11	4	392.968	5926.22	4	399.904	5999.2	4	375.654	5649.32	4	387.745	5533.65
402.407	5807.97	4	396.841	6103.23	4	407.136	5948.58	4	547.375	1597.35	1	435.413	5571.28	4	432.319	5617.45	4	452.765	5704.87	4	538.785	1566.15	1	380.586	5413.25	4	397.048	5549.3	4	407.127	6086.33	4	539.794	1630	1	383.829	5695.14	4	392.969	5903.41	4	399.958	5561	4	375.685	5914.97	4	387.75	5764.69
402.427	5715.33	4	396.856	5915.38	4	407.141	6017.14	4	547.381	1684.65	1	435.513	5525.34	4	432.331	6003.98	4	452.779	5800.73	4	538.813	1611.3	1	380.588	5894.25	4	397.052	5907.05	4	407.142	5655.28	4	539.798	1682.7	1	383.862	5785.09	4	392.984	6018.74	4	400	5616.38	4	375.688	5810.53	4	387.786	5448.02
402.432	6032.87	4	396.884	5745.37	4	407.149	5852.28	4	547.39	1602.11	1	435.52	5549.01	4	432.464	5648.68	4	452.818	5589.06	4	538.814	1642.43	1	380.619	5730.58	4	397.069	5613.99	4	407.162	6344.65	4	539.803	1538.37	1	383.862	5698.01	4	392.995	5676.71	4	400.022	5819.79	4	375.69	6212.91	4	387.821	5708.67
402.438	5985.11	4	396.889	5732.89	4	407.17	5901.53	4	547.393	1418.88	1	435.529	5737.02	4	432.494	5744.4	4	452.929	5787.98	4	538.817	1664.34	1	380.636	6018.55	4	397.073	5630.53	4	407.185	6075.72	4	539.823	1629.81	1	383.863	5764.92	4	392.997	5616.41	4	400.024	6207.28	4	375.715	5603.04	4	387.829	5644.17
402.461	5691.19	4	396.893	5609.39	4	407.196	6070.33	4	547.401	1678.69	1	435.663	5799.55	4	432.522	5970.41	4	452.954	6028.37	4	538.823	1685.67	1	380.641	6132.84	4	397.093	5701.57	4	407.226	5710.05	4	539.847	1600.04	1	383.876	5901.17	4	393.033	6170.05	4	400.037	5461.63	4	375.748	5613.82	4	387.904	6098.21
402.512	5586.12	4	396.901	5893.15	4	407.246	5907.73	4	547.449	1543.28	1	435.683	5506.82	4	432.564	5918.76	4	452.958	5607.17	4	538.825	1616.59	1	380.653	5738.92	4	397.113	5811.24	4	407.278	5744.47	4	539.858	1658.71	1	383.877	6212.68	4	393.052	5943.95	4	400.053	5893.66	4	375.785	5782.08	4	387.915	6090.55
402.569	5334.13	4	396.95	5723.06	4	407.264	5735.72	4	547.47	1679.08	1	435.735	5706.96	4	432.598	5638.69	4	452.977	5651.65	4	538.84	1692.81	1	380.699	5956.08	4	397.121	5704.13	4	407.279	5785.65	4	539.861	1646.44	1	383.891	5864.55	4	393.06	5965.9	4	400.058	5991.55	4	375.819	5692.82	4	387.928	5541.51
402.572	5630.78	4	396.974	5594.92	4	407.27	5565.72	4	547.478	1634.23	1	435.755	6182.12	4	432.613	5664.07	4	452.989	6136.75	4	538.847	1497.12	1	380.724	6030.42	4	397.207	6204.79	4	407.292	5909.83	4	539.867	1672.35	1	383.94	5971.63	4	393.093	5676.99	4	400.077	5754.72	4	375.831	5853.5	4	387.928	5538.78
402.64	5839.89	4	396.986	5760.02	4	407.278	5874.59	4	547.481	1582.31	1	435.81	5859.61	4	432.654	5633.77	4	453.081	5308.84	4	538.877	1602.33	1	380.739	5707.26	4	397.235	5916.17	4	407.305	6048.29	4	539.871	1618.47	1	383.976	5705.93	4	393.113	5602.3	4	400.092	5954.57	4	375.835	5699.11	4	387.93	5749.28
402.724	5600.13	4	397.007	5629.37	4	407.31	5759.82	4	547.505	1779.34	1	435.854	5738.39	4	432.714	5647.44	4	453.091	6071.66	4	538.878	1595.4	1	380.782	5746.39	4	397.266	5866.76	4	407.323	5783.91	4	539.879	1619.57	1	383.996	5560.44	4	393.158	5690.51	4	400.096	5697.63	4	375.848	5726.08	4	387.959	5960.26
402.733	5437.35	4	397.016	6338.79	4	407.334	5787.72	4	547.519	1598.04	1	435.973	5786.86	4	432.722	5902.99	4	453.135	5706.51	4	538.891	1617.85	1	380.793	5745.57	4	397.274	5542.85	4	407.345	5582.38	4	539.886	1628.67	1	384.023	6094.75	4	393.17	5698.94	4	400.101	5476.43	4	375.864	5504.1	4	387.962	5418.96
402.743	5907.69	4	397.031	5556.83	4	407.468	5674.21	4	547.52	1606.36	1	435.977	5475.22	4	432.771	5378.03	4	453.273	5644.01	4	538.896	1596.66	1	380.808	5845.3	4	397.291	5926.39	4	407.396	5641.24	4	539.889	1659.68	1	384.054	5883.16	4	393.173	6227.35	4	400.105	5950.68	4	375.883	5613.66	4	387.964	5549.12
402.749	5867.48	4	397.037	6029.89	4	407.471	5623.54	4	547.539	1622.44	1	436.082	5903.31	4	432.787	5506.5	4	453.33	5974.47	4	538.899	1693.87	1	380.819	6023.2	4	397.306	5449.71	4	407.417	5697.22	4	539.89	1666.76	1	384.057	5793.51	4	393.218	5553.04	4	400.121	5946.72	4	375.889	5478.91	4	388.001	5754.4
402.829	5945.76	4	397.103	5972.15	4	407.497	5808.45	4	547.542	1614.64	1	436.102	5678	4	432.832	5576.85	4	453.417	5469.7	4	538.917	1711.49	1	380.819	6141.09	4	397.43	5821.46	4	407.436	5688.94	4	539.904	1622.7	1	384.091	6121.3	4	393.236	5709.77	4	400.225	5438.59	4	375.907	5897.42	4	388.097	5993.62
402.849	5685	4	397.114	5369.67	4	407.517	5868.24	4	547.561	1513.18	1	436.117	5667.84	4	432.953	5544.25	4	453.461	5617.9	4	538.937	1653.64	1	380.839	5647.08	4	397.441	5754.88	4	407.507	5820.44	4	539.932	1617.55	1	384.115	5784.55	4	393.275	5692.71	4	400.257	6123.24	4	375.949	5604.26	4	388.166	5697.32
402.851	6003.37	4	397.12	5758.91	4	407.592	5631.39	4	547.597	1638.5	1	436.233	5683.65	4	432.982	6013.28	4	453.594	6156.01	4	538.965	1562.07	1	380.861	5597.85	4	397.45	5502.88	4	407.516	5764.86	4	539.935	1682.02	1	384.144	5786.89	4	393.295	6092.88	4	400.265	5722.48	4	375.965	5841.6	4	388.167	5840.47
402.874	5552.09	4	397.122	5773.22	4	407.593	5739.61	4	547.625	1632.45	1	436.291	5737.39	4	432.987	5635.51	4	453.623	5636.95	4	539.029	1652.68	1	380.87	6177.35	4	397.459	6057.82	4	407.527	5794.89	4	540.008	1677.09	1	384.146	5806.14	4	393.328	5788.8	4	400.281	6000.12	4	375.97	5773.89	4	388.174	5994.48
402.886	5578.82	4	397.156	5880.26	4	407.602	5734.01	4	547.627	1690.62	1	436.417	5789.25	4	433.008	5897.8	4	453.628	5726.47	4	539.039	1578.9	1	380.884	5662.35	4	397.469	5871.38	4	407.545	5623.77	4	540.012	1574.63	1	384.152	6023.8	4	393.344	5724.15	4	400.313	5833.8	4	375.989	5743.99	4	388.176	5568.67
402.886	5555.21	4	397.16	5871.62	4	407.613	5754.12	4	547.633	1516.86	1	436.475	5906.24	4	433.057	5643.97	4	453.692	5621.33	4	539.048	1646.74	1	380.909	5841.57	4	397.493	5728.09	4	407.601	5660.09	4	540.02	1614.43	1	384.206	5587.49	4	393.351	5728.13	4	400.318	5856.04	4	376.004	5702.65	4	388.182	6023.09
402.908	5507.76	4	397.174	5621.49	4	407.639	5841.67	4	547.648	1625.57	1	436.631	5583.03	4	433.125	5533.77	4	453.755	6071.78	4	539.056	1615.89	1	381.018	5647.83	4	397.546	5570.91	4	407.608	6023.2	4	540.076	1549.91	1	384.21	5883.29	4	393.369	6116.96	4	400.36	6051.21	4	376.046	5787.64	4	388.186	6004.87
402.916	5984.07	4	397.187	5873.16	4	407.646	5579.95	4	547.657	1629.69	1	436.709	5582.87	4	433.352	5558.08	4	453.798	5517.45	4	539.06	1594.1	1	381.081	5626.38	4	397.561	5622.77	4	407.617	5821.24	4	540.077	1615.08	1	384.244	5791.12	4	393.37	5783.67	4	400.377	5438.46	4	376.061	5730.16	4	388.199	5780.57
402.942	5974.95	4	397.225	5849.6	4	407.651	5562.86	4	547.679	1680.95	1	436.851	5783.27	4	433.36	5539.91	4	453.853	5658.2	4	539.078	1775.93	1	381.139	5919.43	4	397.565	5505.9	4	407.624	5819.31	4	540.09	1618.92	1	384.278	5756.47	4	393.379	5973.72	4	400.463	5827.31	4	376.08	5808.71	4	388.22	5677.99
402.985	5660.65	4	397.236	5899.86	4	407.656	5636.45	4	547.693	1684.68	1	436.882	5665.94	4	433.377	5653.28	4	453.929	6000.08	4	539.113	1655.56	1	381.158	5666.15	4	397.591	5866.2	4	407.632	5766.8	4	540.094	1632.35	1	384.283	5642.03	4	393.399	6107.91	4	400.505	5456.75	4	376.108	6008.83	4	388.249	5662.53
403.136	5572.17	4	397.254	5650.1	4	407.658	5810.63	4	547.702	1774.34	1	436.889	5695.54	4	433.419	5685.26	4	453.953	5708.34	4	539.141	1644.28	1	381.162	5813.11	4	397.621	5840.49	4	407.638	5455.45	4	540.121	1743.9	1	384.296	5926.53	4	393.416	5853.14	4	400.51	6044.05	4	376.139	5930.68	4	388.252	5484.51
403.141	6208.1	4	397.264	5812.45	4	407.663	6156.61	4	547.713	1605.93	1	436.893	5436.3	4	433.445	5490.29	4	454.031	5716.46	4	539.141	1592.48	1	381.169	5651.22	4	397.651	5914.22	4	407.644	6033.7	4	540.135	1623.06	1	384.337	5767.17	4	393.419	5865.43	4	400.543	5515.84	4	376.152	5747.6	4	388.265	5789.01
403.157	5527.95	4	397.281	5742.9	4	407.663	5687.5	4	547.72	1736.64	1	436.928	5706.84	4	433.468	6161.39	4	454.092	5828.54	4	539.142	1641.9	1	381.181	5875.89	4	397.654	5690.3	4	407.649	5815.59	4	540.192	1788.55	1	384.338	5810.4	4	393.42	5793.74	4	400.557	5617.03	4	376.179	5652.81	4	388.309	5914.18
403.168	5732.69	4	397.318	5926.84	4	407.671	6275.24	4	547.728	1680.34	1	436.94	5520.52	4	433.475	5662.2	4	454.183	5789.81	4	539.155	1672.9	1	381.215	6075.22	4	397.664	5780.43	4	407.652	5854.69	4	540.223	1597.33	1	384.367	5997.86	4	393.421	5494.54	4	400.557	5926.19	4	376.18	5612.08	4	388.322	5765.16
403.243	5567.13	4	397.342	5696.66	4	407.727	5528.19	4	547.736	1624.1	1	437.031	6169.17	4	433.5	5717.25	4	454.202	5851.92	4	539.157	1518.66	1	381.273	5913.54	4	397.667	5576.51	4	407.665	5991.49	4	540.238	1628.88	1	384.369	5666.08	4	393.459	5628.53	4	400.575	5665.81	4	376.228	5701.83	4	388.333	5767.1
403.244	5609.65	4	397.351	5603.99	4	407.779	5765.79	4	547.739	1596.97	1	437.161	5821.62	4	433.505	5706.16	4	454.214	5891.94	4	539.19	1627.94	1	381.274	6046.55	4	397.718	6409.14	4	407.69	5646.14	4	540.255	1614.3	1	384.371	5726.22	4	393.463	5841.78	4	400.624	6072.83	4	376.254	5658.01	4	388.334	5414.69
403.246	5279.88	4	397.357	5787.85	4	407.792	5938.37	4	547.76	1577.17	1	437.235	5635.84	4	433.509	5743.5	4	454.327	5475.87	4	539.191	1598.55	1	381.307	6156.69	4	397.73	5608.59	4	407.742	5953.92	4	540.262	1574.9	1	384.377	5784.49	4	393.494	5691.69	4	400.66	5530.04	4	376.264	5751.29	4	388.394	5796.9
403.255	5572.97	4	397.378	5711.38	4	407.804	5914.26	4	547.768	1769.82	1	437.249	5849.74	4	433.528	5851.19	4	454.343	6043.48	4	539.236	1650.98	1	381.328	5865.32	4	397.8	5842.21	4	407.747	6025.5	4	540.289	1686.73	1	384.383	6108.89	4	393.501	5703.5	4	400.667	5582.7	4	376.294	5760.59	4	388.42	5568.86
403.382	5744.21	4	397.408	5933.3	4	407.806	5634.05	4	547.768	1605.08	1	437.305	5887.07	4	433.862	5535.82	4	454.35	5492.73	4	539.25	1505.89	1	381.334	5711.46	4	397.814	5721.07	4	407.793	6049.91	4	540.301	1572.29	1	384.394	5817.63	4	393.505	5852.8	4	400.67	6256.76	4	376.301	5408.31	4	388.431	5567.89
403.459	5788.19	4	397.455	5926.52	4	407.809	5582.92	4	547.768	1631.53	1	437.354	5833.61	4	433.871	5693.89	4	454.354	5807.59	4	539.282	1628.34	1	381.353	5840.18	4	397.816	5735.17	4	407.798	5721.01	4	540.322	1682.03	1	384.432	5770.98	4	393.577	5928.62	4	400.675	5639.37	4	376.317	5750.14	4	388.448	5878.59
403.465	5608.51	4	397.463	5734.95	4	407.843	5731.97	4	547.785	1588.5	1	437.375	5669.14	4	433.905	5761.64	4	454.376	5863.49	4	539.292	1731.21	1	381.355	6005.14	4	397.844	5667.5	4	407.805	5754.03	4	540.323	1537.74	1	384.443	5691.52	4	393.634	5545.09	4	400.687	5755.02	4	376.319	5742.09	4	388.476	5786.71
403.468	5602.48	4	397.489	5703.31	4	407.898	5631.94	4	547.792	1615.38	1	437.429	5750.74	4	433.924	6003.94	4	454.464	6024.04	4	539.292	1727.55	1	381.379	5673.28	4	397.869	5664.43	4	407.838	5668.66	4	540.333	1671.49	1	384.447	5972.49	4	393.65	5769.4	4	400.716	5743.22	4	376.37	5706.69	4	388.505	5918.57
403.49	5780.64	4	397.542	5728.52	4	407.9	5541.38	4	547.808	1608.89	1	437.477	5627.49	4	433.947	5586.78	4	454.512	5776.53	4	539.302	1596.19	1	381.405	5998.16	4	397.872	5929.84	4	407.841	5859.44	4	540.373	1540.74	1	384.457	5886.63	4	393.661	5813.98	4	400.774	5673.62	4	376.422	5652.87	4	388.529	5682.12
403.493	5499.1	4	397.576	6430.13	4	407.903	5637.7	4	547.82	1567.09	1	437.562	5786.33	4	433.988	5751.43	4	454.536	5744.59	4	539.303	1648.25	1	381.435	5666.16	4	397.92	6055.5	4	407.866	5611.65	4	540.376	1707.44	1	384.48	5825.26	4	393.672	5610.14	4	400.818	5722.05	4	376.461	5781.81	4	388.562	5542.61
403.497	5681.26	4	397.605	5736.12	4	407.934	5729.65	4	547.821	1620.15	1	437.825	5537.1	4	434.009	6243.39	4	454.711	5743.78	4	539.348	1597.18	1	381.483	5949.52	4	397.921	5594.92	4	407.884	5905.09	4	540.378	1632.38	1	384.485	5798.93	4	393.673	5764.55	4	400.838	5776.02	4	376.466	5490.02	4	388.616	5605.38
403.501	6103.18	4	397.615	5691.32	4	407.941	5678.21	4	547.88	1652.78	1	437.867	5668.98	4	434.035	5691.47	4	454.718	5682.05	4	539.351	1459.64	1	381.507	5740.33	4	397.936	5609.53	4	407.884	5553.12	4	540.398	1764.95	1	384.499	5831.1	4	393.736	5841.61	4	400.891	5852.19	4	376.48	6327.92	4	388.627	5967.92
403.55	5542.5	4	397.67	5730.11	4	407.968	5694.45	4	547.894	1608.07	1	437.891	5756.89	4	434.074	5555.68	4	454.801	5693.43	4	539.362	1588.85	1	381.521	5830.86	4	397.986	5535.6	4	407.885	6141.15	4	540.412	1625.93	1	384.515	5811.12	4	393.762	5549.37	4	400.978	5802.73	4	376.488	5817.13	4	388.652	6173.12
403.551	5532.43	4	397.676	6169.91	4	407.981	5792.03	4	547.902	1769.2	1	437.941	5691.2	4	434.087	5592.88	4	454.882	5763.42	4	539.377	1515.09	1	381.539	5867.69	4	397.998	5924.77	4	407.891	5615.33	4	540.427	1722.01	1	384.524	5881	4	393.776	5788.68	4	400.986	5852.66	4	376.521	5645.66	4	388.66	5723.92
403.611	5633.31	4	397.685	5658.7	4	408.003	5665.64	4	547.903	1682	1	437.987	5748.2	4	434.096	5433.45	4	454.975	5639.48	4	539.384	1753.93	1	381.551	5718.26	4	398.012	5904.89	4	407.994	6011.3	4	540.446	1631.94	1	384.53	6134.99	4	393.779	5623.41	4	400.99	5935.19	4	376.563	5758.22	4	388.69	6115.14
403.616	5795.38	4	397.737	5486.83	4	408.009	5695.47	4	547.919	1626.25	1	438.02	5647.86	4	434.115	5755.99	4	455.02	5474.46	4	539.404	1600.51	1	381.587	6078.34	4	398.056	5857.02	4	408.007	5823.98	4	540.461	1781.16	1	384.551	5627.51	4	393.789	5722.57	4	401.028	5727.25	4	376.566	5702.94	4	388.7	5822.43
403.648	5922.34	4	397.765	5768.93	4	408.01	5663.67	4	547.968	1716.68	1	438.045	5801.52	4	434.128	6250.82	4	455.062	5860.37	4	539.412	1634.69	1	381.636	5864.32	4	398.089	5733.3	4	408.023	5714.6	4	540.477	1653.94	1	384.573	5782.82	4	393.805	5561.12	4	401.036	5793.36	4	376.571	6280.97	4	388.703	5557.4
403.658	5762.97	4	397.776	5975.09	4	408.026	5996.71	4	547.972	1649.17	1	438.081	5699.5	4	434.133	5272.21	4	455.095	5752.92	4	539.413	1659.56	1	381.663	5609.81	4	398.1	5802.59	4	408.031	5821.12	4	540.48	1623.76	1	384.575	5908.24	4	393.81	5621.52	4	401.041	5784.6	4	376.591	5671.04	4	388.718	5583.62
403.664	5612.21	4	397.784	5551.51	4	408.052	5847.44	4	547.986	1622.81	1	438.139	5774.19	4	434.193	5583.8	4	455.307	5440	4	539.429	1610.04	1	381.671	6282.86	4	398.117	5980.71	4	408.063	5884.79	4	540.494	1680.67	1	384.589	5533.1	4	393.813	5562.37	4	401.046	5559.23	4	376.608	5522.87	4	388.761	5680.24
403.713	5577.86	4	397.787	5874.83	4	408.089	5713.76	4	548.021	1662.88	1	438.143	5737.96	4	434.241	5669.01	4	455.399	5815.1	4	539.466	1589.91	1	381.707	5865.43	4	398.138	5818.35	4	408.071	5612.34	4	540.51	1705.31	1	384.608	6234.99	4	393.834	5643.39	4	401.066	5668.76	4	376.617	5978.74	4	388.767	5596.95
403.729	5587.92	4	397.83	5728.91	4	408.092	5788.63	4	548.022	1709	1	438.267	5924.48	4	434.262	5662.98	4	455.437	5640.42	4	539.467	1563.99	1	381.716	5936.82	4	398.146	5486.34	4	408.08	5893.95	4	540.518	1601.62	1	384.635	5731.98	4	393.858	5808.81	4	401.072	5856.05	4	376.64	5689.25	4	388.795	5500.3
403.75	5865.96	4	397.878	5687.93	4	408.095	5902.36	4	548.035	1630.72	1	438.318	5800.56	4	434.275	5643.28	4	455.449	5781.8	4	539.473	1775.68	1	381.722	6137.19	4	398.167	6146.79	4	408.101	5857.26	4	540.522	1618.54	1	384.643	5632.06	4	393.89	6168.12	4	401.077	5723.2	4	376.652	6137.03	4	388.806	5523.95
403.816	5683.14	4	397.884	5691.84	4	408.102	5814.94	4	548.036	1611.57	1	438.322	5674.77	4	434.322	5803.9	4	455.616	5470.91	4	539.496	1539.5	1	381.753	5941.4	4	398.203	5571.66	4	408.11	5928.98	4	540.538	1708.7	1	384.645	5919.35	4	393.946	5899.83	4	401.114	5679.39	4	376.656	6189.47	4	388.816	5918.52
403.852	5874.94	4	397.888	5583.34	4	408.102	5761.7	4	548.085	1596.11	1	438.371	5649.84	4	434.367	5528.03	4	455.65	5811.91	4	539.515	1687.47	1	381.767	6158.29	4	398.21	5593.6	4	408.145	5731.36	4	540.567	1578.29	1	384.646	5625.2	4	393.967	5898.31	4	401.129	5617.71	4	376.691	5729.64	4	388.825	5881.89
403.903	5599.97	4	397.93	5994.34	4	408.105	6104.4	4	548.114	1614.12	1	438.423	5799.43	4	434.425	5921.45	4	455.651	5655.39	4	539.546	1612.36	1	381.802	5724.04	4	398.214	5327.29	4	408.167	5663.06	4	540.568	1708.72	1	384.716	5652.82	4	393.988	5649.41	4	401.14	5751.18	4	376.733	5682.9	4	388.862	5917.7
403.918	6027.74	4	397.934	5920.5	4	408.107	5860.27	4	548.122	1700.86	1	438.519	5704.61	4	434.431	5981.34	4	455.681	6008.1	4	539.557	1555.32	1	381.815	5860.4	4	398.229	6110.84	4	408.221	6022.31	4	540.575	1576.49	1	384.738	6055.28	4	394.031	5809.32	4	401.143	5798.11	4	376.764	5915.51	4	388.901	5352.34
403.921	5608.76	4	397.963	5814.56	4	408.113	6040.4	4	548.139	1687.51	1	438.528	5998.22	4	434.445	5553.92	4	455.687	5552.39	4	539.594	1642.11	1	381.816	5795.74	4	398.241	5691.17	4	408.238	5658.25	4	540.601	1680.21	1	384.741	5822.3	4	394.08	5697.81	4	401.152	5891.86	4	376.784	5757.88	4	388.905	5622.79
403.938	5641.62	4	397.971	5605.96	4	408.168	5664.69	4	548.139	1762.9	1	438.573	5902.2	4	434.447	5748.5	4	455.752	5879.92	4	539.624	1594.78	1	381.817	5722.19	4	398.253	5594.21	4	408.238	5595.53	4	540.616	1742.68	1	384.743	5795.26	4	394.091	5909.49	4	401.154	5725.76	4	376.836	5631.81	4	388.907	5687.43
403.957	5909.91	4	397.983	5699.65	4	408.172	5670.39	4	548.141	1595.85	1	438.649	5618.34	4	434.452	5635.72	4	455.927	5531.29	4	539.67	1627.37	1	381.822	6415.76	4	398.286	5783.47	4	408.305	5867.92	4	540.655	1686.13	1	384.788	5864.27	4	394.106	5489.18	4	401.156	5864.28	4	376.848	5711.33	4	388.911	6026.82
404.038	5572.51	4	397.989	5729.31	4	408.182	5844.76	4	548.186	1613.27	1	438.792	5781.18	4	434.486	5559.17	4	455.997	5569.51	4	539.69	1737.37	1	381.851	6261.64	4	398.288	5675.87	4	408.312	5712.01	4	540.682	1693.88	1	384.807	5850.3	4	394.124	5517.72	4	401.17	6230.09	4	376.857	6309.13	4	388.916	5642.46
404.043	6028.59	4	397.991	5579.58	4	408.202	5877	4	548.195	1662.48	1	439.017	5649.87	4	434.661	5759.6	4	456.012	5813.85	4	539.726	1675.06	1	381.852	5718.29	4	398.292	5749.16	4	408.32	5998.8	4	540.72	1715.13	1	384.813	5747.14	4	394.138	5792.56	4	401.174	5482.96	4	376.909	5734.91	4	388.948	5757.98
404.106	5657.05	4	398.033	5651.58	4	408.204	5809.27	4	548.199	1739.39	1	439.199	5784.53	4	434.669	5716.19	4	456.023	6024.49	4	539.768	1664.83	1	381.866	5929.2	4	398.305	5789.06	4	408.325	5549.06	4	540.722	1642.06	1	384.825	5978.68	4	394.145	5829.9	4	401.176	6008.82	4	376.938	5888.76	4	388.959	5766.69
404.129	5970.24	4	398.048	5630.37	4	408.219	6117.8	4	548.205	1642.83	1	439.21	5654.17	4	434.752	5613.3	4	456.113	5750.07	4	539.784	1686.64	1	381.89	5716.1	4	398.314	5694.78	4	408.331	5554.07	4	540.723	1738	1	384.854	5630.68	4	394.154	6188.31	4	401.183	5491.07	4	376.941	5996.93	4	389.016	5744.62
404.147	5750.49	4	398.062	5757.87	4	408.238	6126.12	4	548.212	1745.97	1	439.387	5807.36	4	434.76	5526.54	4	456.132	5649.52	4	539.825	1646.82	1	381.933	5849.58	4	398.322	5937.51	4	408.333	5690.58	4	540.752	1676.45	1	384.87	5724.95	4	394.188	6031.23	4	401.202	6417.06	4	377	5793	4	389.046	5957.68
404.209	5764.52	4	398.079	5485	4	408.248	6074.32	4	548.228	1763.2	1	439.468	5652.95	4	434.826	5707.73	4	456.228	6069.63	4	539.845	1681.88	1	381.934	6021.43	4	398.422	5796.13	4	408.339	5621.68	4	540.767	1604.53	1	384.895	5830.68	4	394.223	5627.83	4	401.232	5765.9	4	377.099	5726.9	4	389.048	5678.25
404.227	5631.35	4	398.082	5774.01	4	408.255	5728.27	4	548.229	1591.63	1	439.475	5775.59	4	434.841	6338.48	4	456.318	5840	4	539.858	1761.79	1	381.952	5773.93	4	398.465	5978.78	4	408.342	5806.53	4	540.785	1586.83	1	384.923	6070.83	4	394.237	5708.02	4	401.251	5878.91	4	377.106	5933.4	4	389.051	5767.78
404.243	5801.55	4	398.088	5648.06	4	408.293	5687.19	4	548.23	1606.54	1	439.48	6189.27	4	434.858	5612.35	4	456.328	5784.73	4	539.885	1545.91	1	381.956	5867.08	4	398.475	5816.99	4	408.347	5819.72	4	540.814	1683.56	1	384.935	5714.99	4	394.24	5910.24	4	401.264	5760.66	4	377.124	6085.07	4	389.066	5476.68
404.25	6143.89	4	398.105	5639.76	4	408.297	5565.52	4	548.231	1679.26	1	439.61	5402.56	4	434.915	5532.7	4	456.386	6019.06	4	539.89	1685.24	1	381.958	6076.12	4	398.486	5748.57	4	408.372	5648.78	4	540.822	1607.81	1	384.948	5815.58	4	394.266	5697.76	4	401.272	5693.98	4	377.125	5703.23	4	389.067	6117.12
404.302	5973.24	4	398.108	5742.49	4	408.301	5811.38	4	548.248	1775.73	1	439.648	5775.91	4	434.921	6073.7	4	456.387	5702.11	4	539.962	1615.99	1	381.974	5599.87	4	398.523	5836.05	4	408.39	5737.34	4	540.826	1693.73	1	384.958	5805.86	4	394.284	5865.29	4	401.275	5869.84	4	377.132	5895.01	4	389.086	5580.21
404.45	5301.07	4	398.144	5581.96	4	408.334	5708.64	4	548.25	1609.83	1	439.713	5934.88	4	434.936	5969.99	4	456.399	5707.72	4	539.982	1620.03	1	381.988	5939.25	4	398.562	5641.07	4	408.394	5850.74	4	540.827	1668.22	1	384.959	5858.01	4	394.285	5802.82	4	401.318	5740.19	4	377.156	5714.27	4	389.143	5609.36
404.477	5524.72	4	398.225	5681.51	4	408.34	5706.45	4	548.257	1585.19	1	439.715	5699.13	4	434.977	5541.35	4	456.473	6126.28	4	539.999	1654.44	1	382.009	5837.95	4	398.605	5630.3	4	408.398	6067.79	4	540.827	1654.33	1	384.963	5892.39	4	394.287	6257.19	4	401.402	5588.91	4	377.177	5631.78	4	389.144	5553.87
404.482	5677.74	4	398.248	5643.26	4	408.413	5628.09	4	548.267	1659.34	1	439.805	5676.17	4	435.026	5638.97	4	456.474	5571.22	4	540.011	1845.82	1	382.01	6036.83	4	398.644	5365.05	4	408.406	5775.06	4	540.845	1680.31	1	384.965	5746.95	4	394.296	5737.9	4	401.437	5964.79	4	377.184	5642.67	4	389.176	5798.91
404.489	5667.44	4	398.26	5726.12	4	408.512	5741.33	4	548.279	1553.82	1	439.822	5653.49	4	435.048	5599.82	4	456.485	5708.29	4	540.024	1630.12	1	382.027	6046.2	4	398.668	5870.92	4	408.456	5680.04	4	540.877	1592.04	1	384.989	5992.23	4	394.322	6037.29	4	401.445	5529.99	4	377.186	5831.76	4	389.203	5764.98
404.504	5566.54	4	398.26	5787.79	4	408.542	6010.84	4	548.293	1675.63	1	439.855	5717.83	4	435.069	5493.18	4	456.49	6197.11	4	540.05	1632.55	1	382.042	5639.48	4	398.673	6207.74	4	408.472	6271.13	4	540.887	1700.07	1	385.002	6261.32	4	394.326	6161.34	4	401.463	5643.19	4	377.237	5698.42	4	389.304	5625.33
404.505	5689.51	4	398.323	5605	4	408.556	5836.06	4	548.316	1657.11	1	439.93	5755.62	4	435.081	5986.84	4	456.547	5744.01	4	540.057	1585.58	1	382.062	5855.24	4	398.689	5968.03	4	408.476	5868.54	4	540.9	1500.82	1	385.023	5835.78	4	394.368	5561.03	4	401.466	5885.51	4	377.257	5572.23	4	389.313	5758.03
404.506	5624.74	4	398.331	5708.94	4	408.569	5610.37	4	548.324	1617.46	1	439.978	5736.37	4	435.114	5642.15	4	456.577	5690.09	4	540.069	1707.62	1	382.117	6411.41	4	398.704	6003.01	4	408.485	6033.36	4	540.902	1643.77	1	385.057	6213.39	4	394.384	6165.71	4	401.508	5639.6	4	377.277	5739.18	4	389.317	5445.68
404.528	5875.33	4	398.357	5961.23	4	408.574	5838.31	4	548.325	1695.34	1	440.008	5659.36	4	435.17	5603.14	4	456.581	5718.36	4	540.081	1633.46	1	382.122	5714.34	4	398.707	5903.09	4	408.488	5706.01	4	540.908	1616.92	1	385.102	5629.01	4	394.391	5634.31	4	401.517	5799.85	4	377.293	5568.68	4	389.327	5751.59
404.549	5623.51	4	398.358	6065.73	4	408.611	5576.57	4	548.33	1760.33	1	440.171	5684.6	4	435.171	5419.37	4	456.619	5607.66	4	540.106	1632.76	1	382.137	6018.5	4	398.729	6225.39	4	408.517	5686.79	4	540.914	1673.43	1	385.128	5931.82	4	394.41	6194.47	4	401.529	5846.09	4	377.297	5513.07	4	389.366	5564.48
404.551	5879.27	4	398.386	6060.2	4	408.645	5826.77	4	548.342	1721.12	1	440.294	5844.8	4	435.228	5680.18	4	456.664	5637.94	4	540.109	1617.55	1	382.155	5704.91	4	398.732	5640.33	4	408.55	5651.41	4	540.916	1657.93	1	385.133	5631.96	4	394.416	5510.22	4	401.534	6157.99	4	377.302	5867.82	4	389.412	5984.59
404.551	6072.75	4	398.403	5627.2	4	408.69	5821.97	4	548.351	1661.71	1	440.298	5643.63	4	435.24	5673.73	4	456.678	5721.18	4	540.115	1493.12	1	382.215	5893.22	4	398.742	5610.36	4	408.551	5632.53	4	540.919	1738.84	1	385.152	5600.14	4	394.432	6394.45	4	401.539	5124.71	4	377.305	5842.29	4	389.417	5504.24
404.587	5711.8	4	398.438	5549.96	4	408.712	5564.71	4	548.378	1606.8	1	440.484	5660.25	4	435.244	6101.86	4	456.682	5764.58	4	540.128	1615.15	1	382.24	6054.08	4	398.75	5826.48	4	408.585	5716.5	4	540.931	1611.57	1	385.19	5712.36	4	394.445	5915.16	4	401.544	5780.36	4	377.307	5685.94	4	389.423	5751.86
404.59	5633.01	4	398.444	5748.88	4	408.725	5962.33	4	548.382	1894.31	1	440.485	5903.89	4	435.305	5753.15	4	456.7	5607.92	4	540.153	1703.23	1	382.245	5842.75	4	398.767	5780.09	4	408.613	5666.11	4	540.959	1575.42	1	385.195	6227.84	4	394.492	5363.85	4	401.547	5601.83	4	377.308	5609.75	4	389.449	6205.64
404.627	5907.27	4	398.447	5873.8	4	408.743	5642.45	4	548.402	1537.15	1	440.507	5693.52	4	435.356	6093.82	4	456.774	5648.58	4	540.158	1639.42	1	382.26	6031.28	4	398.776	5789.25	4	408.618	5577.58	4	540.987	1665.79	1	385.271	5706.5	4	394.497	5808.3	4	401.563	5665.23	4	377.318	5849.79	4	389.45	5586.79
404.681	5776.32	4	398.513	5957.95	4	408.813	5665.77	4	548.41	1634.42	1	440.578	5845.29	4	435.365	5648.46	4	456.814	5865.5	4	540.158	1610.81	1	382.268	5858.5	4	398.821	5662.56	4	408.627	5624.84	4	540.988	1716.42	1	385.273	5626.66	4	394.501	5732.04	4	401.623	5632.59	4	377.375	6035.98	4	389.496	5716.31
404.707	5437.64	4	398.524	6099.53	4	408.825	5770.34	4	548.411	1657.94	1	440.658	5612.14	4	435.38	5510.81	4	456.822	5527.19	4	540.163	1647.72	1	382.269	5792.14	4	398.86	5621.92	4	408.655	5778.37	4	541.025	1660.22	1	385.287	5533.76	4	394.512	6202.11	4	401.636	6110.34	4	377.396	5661.21	4	389.502	5856.41
404.725	5955.14	4	398.539	5672.9	4	408.826	5389.3	4	548.416	1639.55	1	440.667	5409.87	4	435.438	5589.09	4	456.898	5624.87	4	540.172	1661.79	1	382.278	5925.31	4	398.865	5507.73	4	408.657	5889.28	4	541.076	1626.82	1	385.306	5833.38	4	394.583	5613.38	4	401.649	5940.18	4	377.413	6055.62	4	389.527	5525.57
404.739	5858.03	4	398.555	5637.29	4	408.855	5574.52	4	548.418	1732.59	1	440.704	5698.24	4	435.449	6035.85	4	456.96	5716.81	4	540.173	1604.84	1	382.283	5619.67	4	398.879	5734.29	4	408.678	5928.68	4	541.092	1618.92	1	385.317	5473.82	4	394.596	5472.94	4	401.676	5736.22	4	377.417	5656.27	4	389.541	6156.35
404.818	5701.68	4	398.576	5837.04	4	408.88	5819.37	4	548.449	1682.76	1	440.757	5918.52	4	435.496	5869.06	4	457.057	5599.07	4	540.176	1648.59	1	382.335	5812.25	4	398.884	5794.74	4	408.712	5682.08	4	541.115	1695.12	1	385.387	5463.31	4	394.602	5674.49	4	401.68	5687.73	4	377.431	5729.97	4	389.555	6105.6
404.82	5878.14	4	398.582	5788.59	4	408.927	5872.46	4	548.46	1696.81	1	440.77	5696.94	4	435.51	5851.38	4	457.109	5705.97	4	540.185	1665.74	1	382.337	5647.02	4	398.898	5877.54	4	408.732	5776.71	4	541.116	1700.12	1	385.438	5903.18	4	394.608	5637.89	4	401.698	5564.16	4	377.432	5621.42	4	389.599	5597.59
404.869	5744.81	4	398.585	5717.35	4	408.94	5814.95	4	548.47	1705.9	1	440.84	5777.3	4	435.559	5649.68	4	457.203	5595.19	4	540.209	1565.77	1	382.387	5720.75	4	398.91	5725.47	4	408.789	5708.29	4	541.122	1604.1	1	385.46	5818.48	4	394.651	5589.47	4	401.709	5564.32	4	377.451	5787.51	4	389.616	5828.26
404.876	5785.99	4	398.594	6116.39	4	408.956	5756	4	548.49	1564.07	1	440.845	5671.35	4	435.62	5551.31	4	457.289	5756.06	4	540.214	1708.84	1	382.422	5887.88	4	398.928	5662.72	4	408.79	5973.68	4	541.129	1663.31	1	385.466	5668.98	4	394.704	5815.37	4	401.715	5848.82	4	377.455	5909	4	389.622	5845.13
404.88	5723.18	4	398.598	5840.9	4	408.965	5875.17	4	548.496	1653.71	1	440.927	5850.31	4	435.688	5767.89	4	457.381	6056.96	4	540.22	1638.27	1	382.444	5731.76	4	398.977	5742.75	4	408.801	5416.37	4	541.131	1621.2	1	385.523	5795.33	4	394.725	6014.79	4	401.72	5788.72	4	377.461	5454.27	4	389.627	5588.83
404.882	5873.01	4	398.613	5621.23	4	409.012	5665.53	4	548.498	1685.53	1	440.938	5667.2	4	435.904	5611.07	4	457.464	5845.17	4	540.26	1697.25	1	382.444	5797.71	4	399.008	6028.73	4	408.826	5832.59	4	541.195	1648.35	1	385.531	5674.31	4	394.734	5536.85	4	401.725	5948.97	4	377.478	5952.73	4	389.667	6210.6
404.942	6024.42	4	398.629	5882.34	4	409.017	5634.08	4	548.521	1579.26	1	440.956	5546.03	4	435.922	5493.02	4	457.467	5681.07	4	540.263	1591.33	1	382.464	5630.23	4	399.017	5870.4	4	408.828	5811.66	4	541.196	1732.76	1	385.572	5916.85	4	394.754	5807.76	4	401.725	5727.32	4	377.497	6089.53	4	389.691	5628.44
404.958	5561.82	4	398.629	5852.09	4	409.042	5711	4	548.541	1665.6	1	441.028	6108.17	4	435.926	5551.64	4	457.549	5796.53	4	540.27	1698.6	1	382.484	5838.03	4	399.03	5662.65	4	408.854	5711.5	4	541.199	1543.13	1	385.622	5873.14	4	394.762	5769.22	4	401.768	6049.72	4	377.532	5774.57	4	389.723	5470.43
404.996	5759.94	4	398.634	5798.1	4	409.051	5470.83	4	548.547	1712.15	1	441.1	5622.69	4	436.04	5613.35	4	457.549	5854.05	4	540.28	1619.92	1	382.492	5803.96	4	399.047	6008.24	4	408.874	5651.53	4	541.2	1677.73	1	385.624	5845.9	4	394.778	5657.61	4	401.87	5943.66	4	377.545	5698.43	4	389.751	5511.12
405.001	5910.7	4	398.694	5626.96	4	409.067	5686.76	4	548.557	1667.44	1	441.148	5688.91	4	436.063	6169.6	4	457.686	5551.93	4	540.307	1673.51	1	382.5	5663.24	4	399.063	5663.94	4	408.934	5626.67	4	541.245	1770.44	1	385.661	5912.96	4	394.826	5795.16	4	401.913	5601.98	4	377.555	5781.82	4	389.754	5349.27
405.033	5784.94	4	398.712	6032.63	4	409.069	5507.19	4	548.564	1720.79	1	441.205	5707.38	4	436.089	5679.95	4	457.696	5665.99	4	540.317	1584.06	1	382.526	5695.82	4	399.075	5731.34	4	408.941	6121.51	4	541.26	1638.48	1	385.676	6055.01	4	394.851	5548.93	4	401.927	5740.32	4	377.557	5873.02	4	389.769	5618.67
405.041	5586.75	4	398.719	5686.14	4	409.098	5710.2	4	548.576	1552.89	1	441.22	5840.9	4	436.127	5793.93	4	457.724	5763.36	4	540.317	1623.8	1	382.575	5953.35	4	399.08	5851.24	4	408.945	5494.46	4	541.272	1685.11	1	385.699	5759.09	4	394.868	5801.38	4	401.942	6267.39	4	377.561	5582.76	4	389.802	5607.61
405.092	5965.92	4	398.797	5692.54	4	409.151	5743.28	4	548.601	1744.68	1	441.277	5695.76	4	436.194	5759.26	4	457.786	5678.57	4	540.33	1706.85	1	382.591	6186.77	4	399.121	5769.36	4	408.978	6160.18	4	541.289	1611.95	1	385.733	5824.94	4	394.931	5854.51	4	401.979	5500.94	4	377.566	5883.96	4	389.858	5753.14
405.105	5682.26	4	398.801	5666.42	4	409.178	5730.78	4	548.602	1624.4	1	441.33	5941.75	4	436.33	5555.37	4	457.903	5476.24	4	540.336	1674.58	1	382.595	5810.84	4	399.128	5867.38	4	409.062	5433.92	4	541.349	1675.45	1	385.757	5740.99	4	394.986	5719.7	4	401.985	5524.24	4	377.596	6017.98	4	389.927	5603.61
405.111	5996.42	4	398.802	6186.33	4	409.18	5846.4	4	548.612	1741.55	1	441.361	6193.62	4	436.349	5987.57	4	457.941	6198.28	4	540.359	1651.06	1	382.599	5882.46	4	399.151	5811.36	4	409.064	5801.82	4	541.35	1743.95	1	385.762	5952.9	4	394.987	5507.13	4	401.986	5633.73	4	377.635	5690.17	4	389.957	5677.56
405.124	5782.05	4	398.809	5974.39	4	409.211	5528.54	4	548.615	1701.93	1	441.414	5684.59	4	436.35	5815.46	4	458.021	5924.7	4	540.389	1677.69	1	382.619	5641.57	4	399.265	5787.01	4	409.07	6105.07	4	541.358	1594.37	1	385.766	5762.88	4	395.014	5849.71	4	402.012	5857.68	4	377.668	5774.22	4	389.966	5626.37
405.14	6025.85	4	398.832	5919.03	4	409.226	5684.14	4	548.631	1688.21	1	441.461	5625.4	4	436.504	5953.44	4	458.032	5377.96	4	540.405	1590.15	1	382.628	5658.26	4	399.289	5925.67	4	409.089	6040.02	4	541.363	1701.23	1	385.801	5760.7	4	395.083	5731.76	4	402.051	5887.33	4	377.706	5852.96	4	390.048	5644.6
405.142	5737.73	4	398.859	5710.94	4	409.27	6018.39	4	548.651	1799.45	1	441.52	5565.04	4	436.548	5566.38	4	458.033	5607.16	4	540.492	1594.95	1	382.636	5719.47	4	399.318	5670.75	4	409.093	5579.38	4	541.375	1636.43	1	385.841	5774.63	4	395.106	5466.9	4	402.056	6003.99	4	377.759	5903.56	4	390.064	5365.43
405.144	5999.25	4	398.909	5903.63	4	409.292	5801.86	4	548.681	1599.61	1	441.535	5710.46	4	436.549	5656.32	4	458.11	5464.92	4	540.495	1846.44	1	382.676	5642.41	4	399.321	5785.63	4	409.099	5684.8	4	541.388	1651.52	1	385.858	6116.5	4	395.112	5865.32	4	402.105	5865.46	4	377.761	5809.29	4	390.069	6348.31
405.197	5656.66	4	398.909	5952.33	4	409.326	5754.67	4	548.694	1675.95	1	441.605	5818.25	4	436.64	5796.37	4	458.182	6090.12	4	540.528	1518.34	1	382.695	5696.39	4	399.329	5634.49	4	409.112	5811.96	4	541.392	1778.79	1	385.875	5809.35	4	395.116	5799.59	4	402.109	5811.89	4	377.769	5715.97	4	390.078	5780.69
405.207	5754.37	4	398.914	5633.21	4	409.327	5612.23	4	548.722	1625.23	1	441.66	1729.91	1	436.7	5747.21	4	458.328	5524.71	4	540.549	1588.57	1	382.712	6045.74	4	399.332	5822.88	4	409.164	5722.75	4	541.4	1677.88	1	385.894	6240.47	4	395.132	6247.47	4	402.137	5899.29	4	377.771	6013.56	4	390.092	5788.5
405.23	5787.03	4	398.967	5694.65	4	409.337	5565.97	4	548.727	1570.65	1	441.727	5710.51	4	436.706	5699.51	4	458.329	5611.07	4	540.585	1595.44	1	382.729	5871.6	4	399.35	5613.47	4	409.178	5829.88	4	541.404	1574.72	1	385.9	6006.19	4	395.144	5498.22	4	402.174	5936.45	4	377.774	5638.61	4	390.129	5655.55
405.251	5801.46	4	398.976	5935.83	4	409.345	5604.2	4	548.739	1615.09	1	441.786	5662.08	4	436.785	5654.45	4	458.394	6176.32	4	540.597	1590.9	1	382.743	5828.28	4	399.351	5758.12	4	409.186	5731.55	4	541.42	1666.72	1	385.903	5738.8	4	395.155	5916.97	4	402.195	5948.33	4	377.78	6074	4	390.157	5757.36
405.27	5539.34	4	399.09	5845.15	4	409.345	5795.92	4	548.742	1532.72	1	441.905	6105.8	4	436.803	5676.91	4	458.41	5740.83	4	540.6	1678.17	1	382.794	5724.39	4	399.432	5958.71	4	409.204	5669.34	4	541.449	1609.38	1	385.94	5764.57	4	395.188	5518.05	4	402.208	5845.22	4	377.803	6003.09	4	390.183	5700.72
405.33	6210.19	4	399.096	5863.98	4	409.397	5805.61	4	548.766	1709.2	1	441.976	5784.84	4	436.817	5294.34	4	458.614	5771.1	4	540.608	1623.41	1	382.8	6182.44	4	399.442	5811.11	4	409.221	5852.56	4	541.452	1731.92	1	385.959	5839.47	4	395.191	5692.72	4	402.211	5598.71	4	377.858	5854.51	4	390.214	5640.43
405.333	5345.12	4	399.118	5582.83	4	409.407	5528.82	4	548.778	1582.13	1	442.077	5763.73	4	436.849	5732.59	4	458.686	5593.4	4	540.615	1656.47	1	382.804	5776.36	4	399.484	5795.5	4	409.223	5730.26	4	541.461	1552.35	1	385.973	5803.68	4	395.197	5875.26	4	402.237	5988.23	4	377.86	5780.76	4	390.217	5387.5
405.337	5662.02	4	399.141	6022.32	4	409.412	5643.01	4	548.811	1593.62	1	442.101	5464.06	4	436.915	5803.49	4	458.718	5560.18	4	540.629	1774.64	1	382.812	5763.24	4	399.513	5892.2	4	409.228	6027.71	4	541.462	1611.27	1	385.98	6126.01	4	395.201	6031.16	4	402.241	5559.38	4	377.898	5649.23	4	390.223	5686.95
405.348	5903.35	4	399.156	5804.55	4	409.416	5505	4	548.821	1513.4	1	442.132	6077.96	4	436.922	5761.95	4	458.754	6009.43	4	540.63	1533.08	1	382.833	5994.06	4	399.517	5866.91	4	409.238	5720.78	4	541.475	1611.21	1	385.983	6165.19	4	395.201	6028.46	4	402.28	5784.77	4	377.904	5640.3	4	390.246	5573.29
405.353	5853.66	4	399.18	6179.19	4	409.443	5708.41	4	548.833	1839.29	1	442.142	5968.22	4	436.952	5679.05	4	458.835	5697.92	4	540.644	1707.24	1	382.865	5547.54	4	399.525	5809.13	4	409.261	5754.92	4	541.489	1602.21	1	385.992	5450.16	4	395.224	5821.04	4	402.292	5770.76	4	377.909	6048.73	4	390.277	5696.04
405.384	5762.75	4	399.192	5759.27	4	409.459	5778.81	4	548.856	1624.32	1	442.143	5818.14	4	436.98	5437.19	4	458.84	5404.99	4	540.645	1780.39	1	382.915	5927.6	4	399.547	5646.95	4	409.298	5863.42	4	541.513	1690.55	1	386.009	6034.71	4	395.231	5975.06	4	402.293	5722.73	4	377.915	5951.22	4	390.298	5661.92
405.413	5542.81	4	399.197	5654.73	4	409.471	5936.47	4	548.872	1511.14	1	442.192	5902.86	4	437.029	5743.73	4	458.879	5617.49	4	540.654	1594.81	1	382.916	5674.39	4	399.572	5550.42	4	409.328	5885.1	4	541.517	1727.46	1	386.052	5881.63	4	395.236	5708.05	4	402.293	5806.23	4	377.943	5679.53	4	390.305	6289.24
405.455	5600.76	4	399.232	5511.84	4	409.516	5794.39	4	548.874	1674.28	1	442.313	5442.27	4	437.045	5576.43	4	458.891	5625.44	4	540.668	1702.47	1	382.92	5981.63	4	399.583	5623.22	4	409.358	5962.2	4	541.533	1748.93	1	386.089	6112.65	4	395.251	5989.18	4	402.324	5577.59	4	377.946	5461.68	4	390.311	5607.42
405.462	5601.45	4	399.251	5641.96	4	409.529	6086.86	4	548.884	1683.13	1	442.342	5666.9	4	437.054	5709.01	4	458.901	5637.87	4	540.672	1705.29	1	382.942	5721.45	4	399.591	5774.13	4	409.378	6101.78	4	541.556	1692.29	1	386.102	5832.07	4	395.284	5911.77	4	402.338	5817.04	4	377.95	5584.22	4	390.325	5465.15
405.532	5799.83	4	399.256	5470.45	4	409.549	5748.52	4	548.897	1588.4	1	442.352	5766.63	4	437.092	5592.01	4	459.009	5342.56	4	540.674	1821.48	1	382.942	5819.86	4	399.638	5816.49	4	409.38	6012.53	4	541.573	1610.75	1	386.102	6061.59	4	395.305	5831.61	4	402.355	5999.97	4	377.979	5703.96	4	390.328	6360.21
405.592	5708.67	4	399.276	6127.64	4	409.574	5673.58	4	548.915	1694.72	1	442.643	5669.21	4	437.107	5640.79	4	459.055	5632.68	4	540.704	1634.08	1	382.955	5908.44	4	399.661	5746.79	4	409.387	5594.63	4	541.582	1648.92	1	386.149	5733.13	4	395.312	6162.5	4	402.382	5742.64	4	377.981	5838.65	4	390.376	6072.03
405.597	5542.56	4	399.289	5641.4	4	409.59	5775.36	4	548.917	1579.68	1	442.649	6221.42	4	437.12	5990.51	4	459.13	5647.27	4	540.712	1759.27	1	382.969	5643.21	4	399.666	5761.23	4	409.395	5810.76	4	541.591	1606.17	1	386.191	5892.84	4	395.349	5725.28	4	402.394	6087.49	4	377.988	5708.75	4	390.394	5838.74
405.649	5779.21	4	399.3	5808.82	4	409.592	5683.31	4	548.923	1596.01	1	442.658	5563.66	4	437.177	5747.39	4	459.147	5793.66	4	540.715	1591.44	1	383.048	5749.17	4	399.686	5512.97	4	409.417	5657.86	4	541.594	1658.09	1	386.198	5783.41	4	395.36	5781.49	4	402.397	5769.8	4	378.042	5730.86	4	390.408	5727.64
405.656	5610.77	4	399.339	5842.66	4	409.608	5666.58	4	548.946	1689.77	1	442.691	5741.01	4	437.216	5753.1	4	459.238	5618.96	4	540.726	1659.54	1	383.053	5716.79	4	399.69	5661.62	4	409.443	5881.72	4	541.601	1573.49	1	386.219	5994.43	4	395.375	5765.19	4	402.4	5708.04	4	378.057	5684.43	4	390.42	5517.4
405.666	6083.9	4	399.388	5851.12	4	409.608	6108.54	4	548.983	1641.38	1	442.735	5730.69	4	437.239	5977.61	4	459.265	5988.31	4	540.748	1641.17	1	383.061	5761.31	4	399.719	6240.36	4	409.463	5754.18	4	541.624	1712.83	1	386.223	6028.36	4	395.38	5668.29	4	402.434	5991.07	4	378.122	5646.72	4	390.425	5744.56
405.672	5722.15	4	399.399	5644.34	4	409.612	5792.53	4	548.997	1625.68	1	442.783	5792.96	4	437.242	5547.16	4	459.279	5955.42	4	540.758	1640.11	1	383.088	6022.28	4	399.732	5707.67	4	409.525	6154.01	4	541.64	1620.43	1	386.232	5878.9	4	395.386	5507.25	4	402.439	5566.12	4	378.141	6263.76	4	390.445	5533.53
405.705	5480.14	4	399.44	6298.48	4	409.617	5722.74	4	549.055	1750.35	1	442.94	5521.6	4	437.313	5427.39	4	459.28	5494.26	4	540.786	1574.24	1	383.101	6042.8	4	399.748	6194.45	4	409.525	5735.79	4	541.641	1630.83	1	386.244	5765.21	4	395.404	5780.56	4	402.468	5700.72	4	378.147	5627.59	4	390.461	5864.53
405.727	6188.31	4	399.446	5932.54	4	409.663	5278.59	4	549.084	1564.86	1	442.979	5836.76	4	437.397	5735.17	4	459.281	5729.78	4	540.812	1584.9	1	383.118	6060.32	4	399.753	5722.85	4	409.529	5737.46	4	541.727	1582.25	1	386.364	5796.31	4	395.435	5676.72	4	402.473	5638.46	4	378.157	5899.87	4	390.462	5736.49
405.739	5656.32	4	399.486	5797.4	4	409.677	5454.27	4	549.12	1704.84	1	443.206	5747.29	4	437.445	5898.14	4	459.312	5546.98	4	540.822	1499.68	1	383.124	5949.79	4	399.761	6178.27	4	409.538	5791.1	4	541.755	1606.44	1	386.37	5608.76	4	395.439	6041.17	4	402.485	5811.53	4	378.172	5874.87	4	390.488	5888.7
405.791	5650.33	4	399.548	5990.96	4	409.717	6123.93	4	549.127	1681.46	1	443.257	5740.2	4	437.475	5552.8	4	459.364	1735.3	1	540.843	1581.29	1	383.154	6108.01	4	399.791	5811.48	4	409.556	5824.26	4	541.759	1720.21	1	386.374	5772.17	4	395.45	5782.56	4	402.493	6463.09	4	378.19	5744.69	4	390.489	5644.18
405.811	5608.37	4	399.565	5531.42	4	409.78	5443.32	4	549.128	1690.01	1	443.332	5877.88	4	437.482	5471.97	4	459.385	5759.42	4	540.849	1655.32	1	383.155	6342.46	4	399.798	5783.63	4	409.578	5801.76	4	541.8	1645.91	1	386.374	6079.9	4	395.452	5836.92	4	402.502	5688.07	4	378.201	5521.59	4	390.501	5755.19
405.838	5760.47	4	399.579	5903.29	4	409.783	5524.07	4	549.15	1651.66	1	443.358	5603.98	4	437.519	5632.41	4	459.408	5729.98	4	540.871	1538.45	1	383.167	5798.48	4	399.812	5647.72	4	409.591	5842.82	4	541.804	1642.28	1	386.472	5835.44	4	395.453	6123.7	4	402.507	5749.41	4	378.201	5810.15	4	390.539	5593.58
405.867	5608.92	4	399.597	5943.04	4	409.803	5446.86	4	549.153	1639.52	1	443.406	5940.77	4	437.619	5629.83	4	459.457	5853.1	4	540.892	1614.97	1	383.226	5594.22	4	399.822	5776.19	4	409.603	5762.79	4	541.806	1623.1	1	386.483	5780.77	4	395.463	5787.07	4	402.508	5550.42	4	378.204	5793.94	4	390.584	5801.62
405.965	5765.48	4	399.643	6079.37	4	409.82	5716.71	4	549.191	1584.34	1	443.412	5684.84	4	437.689	5705.84	4	459.681	5788.81	4	540.895	1561.41	1	383.247	5862.8	4	399.876	5716.66	4	409.622	5855.43	4	541.82	1619.46	1	386.531	5875.08	4	395.516	6102.35	4	402.538	6054.4	4	378.21	5942.16	4	390.638	5720.91
406.018	5866.03	4	399.666	5725.74	4	409.83	5997.69	4	549.195	1614.05	1	443.412	5505.25	4	437.73	5692.39	4	459.729	5918.46	4	540.902	1683.47	1	383.257	5806.31	4	399.878	5884.98	4	409.639	5934.8	4	541.855	1730.25	1	386.583	5668.85	4	395.517	5563.91	4	402.545	5562.16	4	378.248	5831.16	4	390.638	6022.49
406.045	6194.36	4	399.675	5797.36	4	409.835	5602.86	4	549.207	1607.15	1	443.461	5804.64	4	437.732	5571.78	4	459.762	5547.1	4	540.902	1761.97	1	383.274	5607.33	4	399.893	5662.14	4	409.713	5793.73	4	541.86	1631.78	1	386.587	5978.62	4	395.609	5930.74	4	402.562	5745.66	4	378.261	5735.69	4	390.658	6060.14
406.046	5612.11	4	399.681	5822.88	4	409.856	5751.38	4	549.217	1742.84	1	443.541	5695.61	4	437.753	5658.51	4	459.785	5489.31	4	540.903	1595.01	1	383.279	5949.67	4	399.894	5543.01	4	409.719	5730.81	4	541.902	1654.87	1	386.587	5811.63	4	395.614	5827.23	4	402.583	5555.67	4	378.262	5654.57	4	390.665	5677.92
406.05	5891.17	4	399.684	5647.96	4	409.879	5736.8	4	549.228	1666.91	1	443.559	5912.8	4	437.789	6020.9	4	459.798	5503.58	4	540.934	1610.52	1	383.299	5882.32	4	399.929	6079.85	4	409.72	5695.73	4	541.914	1725.43	1	386.623	5900.83	4	395.626	5850.15	4	402.599	5792.65	4	378.298	5882.65	4	390.666	5983.71
406.108	5862.06	4	399.695	5731.13	4	409.905	6007.79	4	549.229	1748.26	1	443.59	5676.76	4	437.94	5498.84	4	460.019	1788.52	1	540.957	1781.54	1	383.34	5640.64	4	399.93	5831.32	4	409.729	5783.95	4	541.933	1799.04	1	386.623	5949.95	4	395.655	5803.39	4	402.599	5971.09	4	378.364	5685.53	4	390.682	6281.9
406.222	5309	4	399.737	5812.87	4	409.906	6210.41	4	549.237	1742.41	1	443.625	6059.19	4	437.989	5788.1	4	460.032	5620.77	4	540.97	1534.97	1	383.349	5607.18	4	399.965	5880.6	4	409.733	5719.94	4	541.942	1585.7	1	386.635	5743.05	4	395.766	5753.1	4	402.602	5684.97	4	378.397	5587.63	4	390.683	5522.29
406.257	5855.12	4	399.761	5857.56	4	409.92	5698.2	4	549.239	1611.43	1	443.8	5729.24	4	437.995	5516.18	4	460.051	5826.26	4	540.988	1574.33	1	383.376	5726.08	4	399.966	5680.53	4	409.739	5927.64	4	541.954	1549.21	1	386.637	6219.03	4	395.771	6195.1	4	402.614	5666.62	4	378.398	5870.45	4	390.692	5742.14
[truncated: 14,308 more rows]
[truncated: 193 more columns]
